# Supplementary material for: Chemo- and regio-selective amidation of indoles with isocyanates using borane Lewis acids
Source: Royal Society of Chemistry journal article supplement (doi:10.1039/d2cy01441f), 2022-01-01
Supplement: d2cy01441f1.pdf [file d2cy01441f1.pdf]

Supporting Information

---

## **Chemo- and Regio-Selective Amidation of Indoles with Isocyanates Using Borane Lewis Acids**

Dr Ayan Dasgupta,<sup>[a]</sup> Michael G. Guerzoni,<sup>[a]</sup> Nusaybah Alotaibi,<sup>[a]</sup> Yara van Ingen,<sup>[a]</sup> Dr Kaveh Farshadfar,<sup>[b]</sup> Prof. Alireza Ariafard,<sup>\*[c]</sup> and Prof. Rebecca L. Melen<sup>\*[a]</sup>

---

[a] Dr A. Dasgupta, M. G. Guerzoni, N. Alotaibi, Y. van Ingen, and Prof. R. L. Melen,  
Cardiff Catalysis Institute, School of Chemistry, Cardiff University, Main Building, Park Place, Cardiff,  
CF10 3AT, Cymru/Wales, United Kingdom.  
E-mail: MelenR@cardiff.ac.uk

[b] Dr Kaveh Farshadfar, Department of Chemistry, Islamic Azad University, Central Tehran Branch, Poonak,  
Tehran 1469669191, Iran.

[c] Prof. A. Ariafard, School of Physical Sciences, University of Tasmania Private Bag 75, Hobart, Tasmania  
7001, Australia.

## Table of Contents

---

### Contents

|                                                                                                                                            |     |
|--------------------------------------------------------------------------------------------------------------------------------------------|-----|
| <b>1. Experimental</b> .....                                                                                                               | 3   |
| 1.1 General experimental .....                                                                                                             | 3   |
| <b>2. Synthesis and Characterisation</b> .....                                                                                             | 4   |
| 2.1 General Procedures .....                                                                                                               | 4   |
| 2.2 Optimisation of reaction conditions for the C3 C–H amidation of 1-methylindole using phenyl isocyanate. ....                           | 5   |
| 2.3 Substrate scope for B(C <sub>6</sub> F <sub>5</sub> ) <sub>3</sub> catalysed amidation of 1-methylpyrrole using aryl isocyanates ..... | 6   |
| 2.4 Optimisation for N–H Amidation of 1 <i>H</i> -Indole.....                                                                              | 7   |
| 2.5 Synthesis and spectral characterisation of C3 C–H amidated products .....                                                              | 10  |
| 2.6 Synthesis and spectral characterisation of N–carboxamidated products .....                                                             | 22  |
| 2.7 Synthesis and spectral characterisation of N–carboxamidated 2-alkynyl products .....                                                   | 32  |
| 2.8 Experiments to support proposed mechanism.....                                                                                         | 37  |
| <b>3. NMR Spectra</b> .....                                                                                                                | 38  |
| <b>4. Crystallographic data</b> .....                                                                                                      | 160 |
| 4.1 Single crystal X-ray diffraction experimental .....                                                                                    | 160 |
| 4.2 Crystal Structures .....                                                                                                               | 162 |
| 4.3 Crystal Structure Data .....                                                                                                           | 173 |
| <b>5. Computational Data</b> .....                                                                                                         | 184 |
| 5.1 Computational details.....                                                                                                             | 184 |
| 5.2 Cartesian Coordinates and Total Energies for the Calculated Structures .....                                                           | 184 |
| <b>6. References</b> .....                                                                                                                 | 212 |

## 1. Experimental

### 1.1 General experimental

Except for the starting materials, all reactions and manipulations were carried out under an atmosphere of dry, O<sub>2</sub>-free nitrogen using standard double-manifold techniques with a rotary oil pump. A nitrogen-filled glove box (MBraun) was used to manipulate solids including the storage of starting materials, ambient temperature reactions, product recovery and sample preparation for analysis. All solvents (toluene, dichloromethane, hexane, acetonitrile) were dried by employing a Grubbs-type column system (Innovative Technology) or a solvent purification system MB SPS-800 and stored under a nitrogen atmosphere. Anhydrous (with Sure/Seal) 1,2-dichloroethane (1,2-C<sub>2</sub>H<sub>4</sub>Cl<sub>2</sub>) and  $\alpha,\alpha,\alpha$ -trifluorotoluene (C<sub>6</sub>H<sub>5</sub>CF<sub>3</sub>) were purchased from Merck and dried over molecular sieves before use. Deuterated solvents were distilled and/or dried over molecular sieves before use. Chemicals were purchased from commercial suppliers and used as received. All the triarylfluoroboranes were prepared as per the standard literature report.<sup>1</sup> Thin-layer chromatography (TLC) was performed on pre-coated aluminium sheets of Merck silica gel 60 F254 (0.20 mm). <sup>1</sup>H, <sup>13</sup>C, <sup>11</sup>B, and <sup>19</sup>F NMR spectra were recorded on a Bruker Avance II 400 or Bruker Avance 500 spectrometer. All coupling constants are absolute values and are expressed in Hertz (Hz). <sup>13</sup>C NMR was measured as <sup>1</sup>H decoupled. Yields are given as isolated yields. Chemical shifts are expressed as parts per million (ppm,  $\delta$ ) downfield of tetramethylsilane (TMS) and are referenced to CDCl<sub>3</sub> (7.26/77.16 ppm) as internal standard. The description of signals includes s = singlet, d = doublet, t = triplet, q = quartet, and m = multiplet, br. = broad. All coupling constants are absolute values and are expressed in Hertz (Hz). All spectra were analysed assuming a first order approximation. IR-Spectra were measured on a Shimadzu IRAffinity-1 photo-spectrometer. Mass spectra were measured on a Waters LCT Premier/XE or a Waters GCT Premier spectrometer. Ions were generated by the Atmospheric Solids, Analysis Probe (ASAP), Electrospray (ES), or Electron Ionisation (EI). The molecular ion peaks values quoted for either molecular ion (M<sup>+</sup>), molecular ion plus or minus hydrogen (M+H<sup>+</sup>, M-H<sup>-</sup>), molecular ion plus sodium (M+Na<sup>+</sup>).

## 2. Synthesis and Characterisation

### 2.1 General Procedures

#### General Procedure a

In the glovebox, three glass microwave vials were charged separately with protected indole (1 equiv), aryl isocyanate (1.5 equiv), and  $B(C_6F_5)_3$  (30 mol %), and then capped with a septum. The three vials were taken outside the glovebox and 0.5 mL of  $\alpha,\alpha,\alpha$ -trifluorotoluene (TFT) were added to each vial using a syringe. Ar-NCO solution was added to the  $B(C_6F_5)_3$  solution and the resulting solution was added to the indole solution dropwise with vigorous stirring at room temperature. All the reactions were carried out at an optimum temperature 80 °C for 22–24 h. All volatiles were removed *in vacuo* and the crude compound was purified *via* preparative thin layer chromatography using hexane/ethyl acetate as eluent.

#### General Procedure b

In the glovebox, three glass microwave vials were charged separately with unprotected indole (1 equiv), aryl isocyanate (1.5 equiv), and  $BCl_3$  [1M solution in hexane] (5 mol %), and then capped with a septum. The three vials were brought outside the glovebox and 0.5 mL of 1,2-dichloroethane (1,2- $C_2H_4Cl_2$ ) were added to each vial using a syringe. Ar-NCO solution was added to the  $BCl_3$  solution and the resulting solution was added to the indole solution dropwise with vigorous stirring at room temperature. All the reactions were carried out at an optimum temperature 60 °C for 16–24 h. All volatiles were removed *in vacuo* and the crude compound was purified *via* preparative thin layer chromatography using hexane/ethyl acetate as eluent.

#### General Procedure c

In the glovebox, three glass microwave vial were charged separately with alkyne derivatives (1 equiv), aryl isocyanate (1.5 equiv), and  $BCl_3$  [1M solution in hexane] (5 mol%), and then capped with a septum. The three vials were brought outside the glovebox and 0.5 mL of 1,2- $C_2H_4Cl_2$  were added to each vial using a syringe. Ar-NCO solution was added to the  $BCl_3$  solution and the resulting solution was added to the indole solution dropwise with vigorous stirring at room temperature. All the reactions were carried out at an optimum temperature 60 °C for 22–24 h. All volatiles were removed *in vacuo* and the crude compound was purified *via* preparative thin layer chromatography using hexane/ethyl acetate as eluent.

For 0.1 mmol scale reaction, 5% catalyst loading require 5  $\mu$ L of the  $BCl_3$ -hexane (1M) solution (a micropipette was used to make a quick transfer the catalyst into the reaction vial and then closed with a cap with septum immediately using a crimper.

**2.2 Table S1: Optimisation of the reaction conditions for the C3 C–H amidation of 1-methylindole using phenyl isocyanate.**

All reactions were carried out on a 0.1 mmol scale using 10 mol% catalyst unless stated otherwise; yields reported are isolated; [a] 20 mol%, [b] 30 mol% [c] 5 mol% B(C<sub>6</sub>F<sub>5</sub>)<sub>3</sub>.

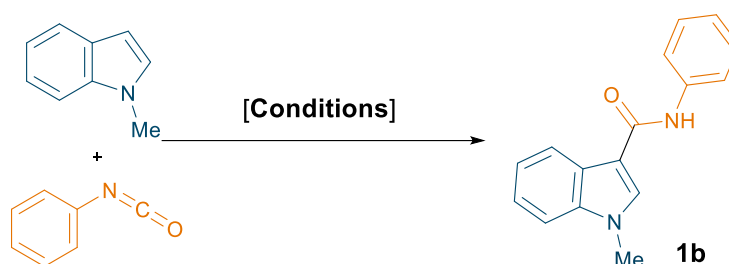

| Entry | Catalyst                                                      | Solvent                                           | Temp (°C) | Time (h) | Yield (%) |
|-------|---------------------------------------------------------------|---------------------------------------------------|-----------|----------|-----------|
| 1     | None                                                          | 1,2-C <sub>2</sub> H <sub>4</sub> Cl <sub>2</sub> | rt        | 24       | -         |
| 2     | None                                                          | 1,2-C <sub>2</sub> H <sub>4</sub> Cl <sub>2</sub> | 60        | 24       | -         |
| 3     | None                                                          | 1,2-C <sub>2</sub> H <sub>4</sub> Cl <sub>2</sub> | 80        | 24       | -         |
| 4     | BF <sub>3</sub> ·OEt <sub>2</sub>                             | 1,2-C <sub>2</sub> H <sub>4</sub> Cl <sub>2</sub> | 80        | 24       | -         |
| 5     | 2,4,6-BAr <sup>F</sup>                                        | 1,2-C <sub>2</sub> H <sub>4</sub> Cl <sub>2</sub> | 80        | 24       | 18        |
| 6     | 3,4,5-BAr <sup>F</sup>                                        | 1,2-C <sub>2</sub> H <sub>4</sub> Cl <sub>2</sub> | 80        | 24       | 23        |
| 7     | B(C <sub>6</sub> F <sub>5</sub> ) <sub>3</sub>                | 1,2-C <sub>2</sub> H <sub>4</sub> Cl <sub>2</sub> | 80        | 24       | 18        |
| 8     | BCl <sub>3</sub>                                              | 1,2-C <sub>2</sub> H <sub>4</sub> Cl <sub>2</sub> | 80        | 24       | 10        |
| 9     | B(C <sub>6</sub> F <sub>5</sub> ) <sub>3</sub>                | Et <sub>2</sub> O                                 | 80        | 24       | -         |
| 10    | B(C <sub>6</sub> F <sub>5</sub> ) <sub>3</sub>                | THF                                               | 80        | 24       | -         |
| 11    | B(C <sub>6</sub> F <sub>5</sub> ) <sub>3</sub>                | CH <sub>3</sub> CN                                | 80        | 24       | -         |
| 12    | B(C <sub>6</sub> F <sub>5</sub> ) <sub>3</sub>                | TFT                                               | 80        | 24       | 35        |
| 13    | B(C <sub>6</sub> F <sub>5</sub> ) <sub>3</sub> <sup>[a]</sup> | TFT                                               | 80        | 24       | 44        |
| 14    | B(C <sub>6</sub> F <sub>5</sub> ) <sub>3</sub> <sup>[b]</sup> | TFT                                               | 80        | 24       | 58        |
| 15    | B(C <sub>6</sub> F <sub>5</sub> ) <sub>3</sub> <sup>[c]</sup> | TFT                                               | 80        | 48       | 14        |

Reported yields are isolated yields.

## 2.3 Substrate scope for the $B(C_6F_5)_3$ catalysed amidation of 1-methylpyrrole using aryl isocyanates

Scheme S1. Substrate scope for the amidation of 1-methylpyrrole using aryl isocyanates using 30 mol%  $B(C_6F_5)_3$ .

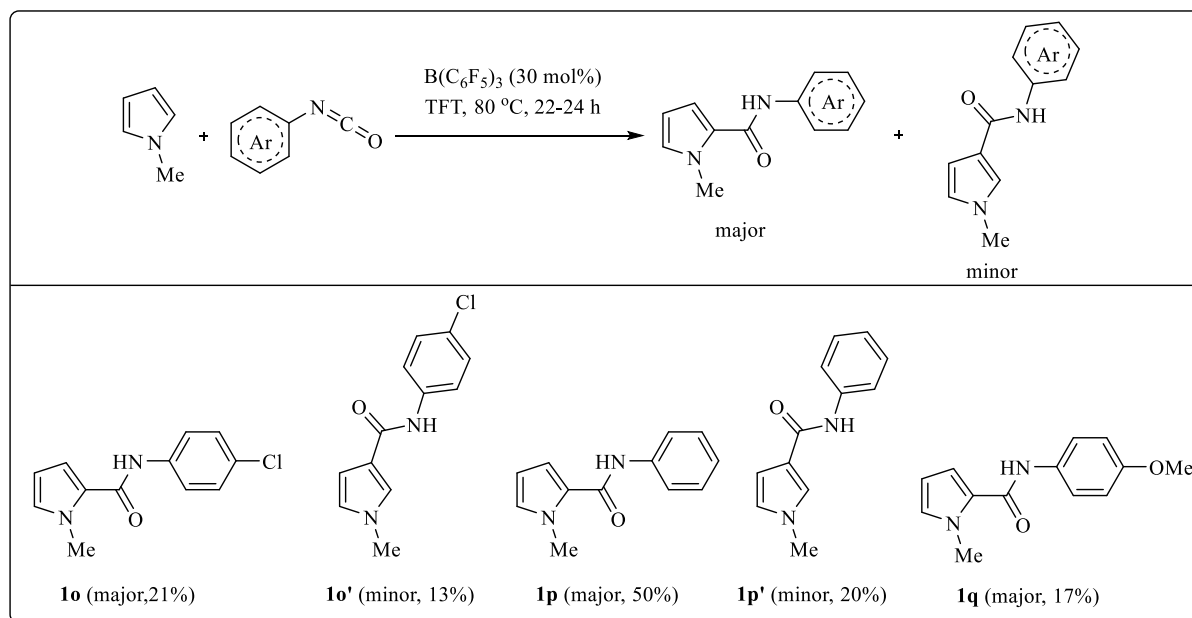

Reported yields are isolated yields.

## 2.4 Optimisation for the N–H Amidation of 1*H*-Indole

**Table S2.** Optimisation for the N–H insertion of 1*H*-Indole.

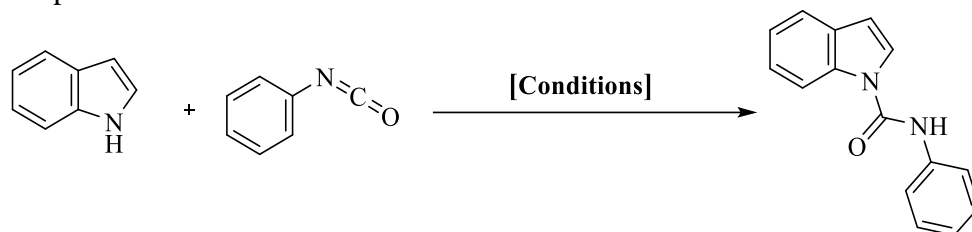

| Entry | Catalyst (mol%)                                     | Solvent                                           | Temp (°C) | Time (h) | Yield of <b>5a</b> (%) |
|-------|-----------------------------------------------------|---------------------------------------------------|-----------|----------|------------------------|
| 1     | B(C <sub>6</sub> F <sub>5</sub> ) <sub>3</sub> (30) | TFT                                               | 80        | 24       | 17                     |
| 2     | B(C <sub>6</sub> F <sub>5</sub> ) <sub>3</sub> (30) | TFT                                               | 80        | 72       | 23                     |
| 3     | B(C <sub>6</sub> F <sub>5</sub> ) <sub>3</sub> (30) | 1,2-C <sub>2</sub> H <sub>4</sub> Cl <sub>2</sub> | 80        | 96       | 38                     |
| 4     | B(C <sub>6</sub> F <sub>5</sub> ) <sub>3</sub> (10) | TFT                                               | 80        | 24       | 10                     |
| 5     | B(C <sub>6</sub> F <sub>5</sub> ) <sub>3</sub> (20) | TFT                                               | 80        | 24       | 14                     |
| 6     | B(C <sub>6</sub> F <sub>5</sub> ) <sub>3</sub> (30) | TFT                                               | 25        | 24       | 12                     |
| 7     | B(C <sub>6</sub> F <sub>5</sub> ) <sub>3</sub> (30) | TFT                                               | 110       | 24       | 24                     |
| 8     | -                                                   | TFT                                               | 80        | 24       | 0                      |
| 9     | BF <sub>3</sub> ·OEt <sub>2</sub> (20)              | 1,2-C <sub>2</sub> H <sub>4</sub> Cl <sub>2</sub> | 87        | 24       | 46                     |
| 10    | BCl <sub>3</sub> (20)                               | 1,2-C <sub>2</sub> H <sub>4</sub> Cl <sub>2</sub> | 87        | 24       | 93                     |
| 11    | BCl <sub>3</sub> (10)                               | 1,2-C <sub>2</sub> H <sub>4</sub> Cl <sub>2</sub> | 87        | 24       | 87                     |
| 12    | BCl <sub>3</sub> (5)                                | 1,2-C <sub>2</sub> H <sub>4</sub> Cl <sub>2</sub> | 87        | 18       | 93                     |
| 13    | BCl <sub>3</sub> (5)                                | 1,2-C <sub>2</sub> H <sub>4</sub> Cl <sub>2</sub> | 60        | 18       | 93                     |
| 14    | BCl <sub>3</sub> (1)                                | 1,2-C <sub>2</sub> H <sub>4</sub> Cl <sub>2</sub> | 60        | 24       | 0                      |
| 15    | BCl <sub>3</sub> (5)                                | 1,2-C <sub>2</sub> H <sub>4</sub> Cl <sub>2</sub> | 25        | 18       | 20                     |
| 16    | BCl <sub>3</sub> (5)                                | 1,2-C <sub>2</sub> H <sub>4</sub> Cl <sub>2</sub> | 45        | 18       | 52                     |
| 17    | H <sub>3</sub> BO <sub>3</sub> (5)                  | 1,2-C <sub>2</sub> H <sub>4</sub> Cl <sub>2</sub> | 60        | 24       | 0                      |

Reported yields are isolated yields.

## 2.5 Synthesis and characterisation of starting materials

### Synthesis of *N*-Benzyl *o*-iodoaniline

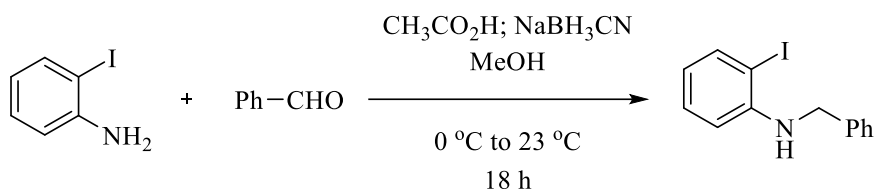

Synthesised in accordance with the procedure illustrated by Wang and co-workers,<sup>2</sup> the following procedure was performed under a moisture and oxygen free N<sub>2</sub> atmosphere. A two-necked round bottom flask was charged with *o*-iodoaniline (10 g, 45.7 mmol, 1 equiv) and benzaldehyde (11.1 mL, 109.6 mmol, 2.4 equiv) and dissolved in methanol (MeOH) (180 mL). The solution was cooled to 0 °C then acetic acid (CH<sub>3</sub>CO<sub>2</sub>H) (10.5 ml, 182.8 mmol, 4 equiv) was added dropwise under vigorous stirring. Sequentially, sodium cyanoborohydride (NaBH<sub>3</sub>CN) (5.74 g, 91.4 mmol, 2 equiv) was added portionwise letting the evolution of gas cease before adding a new portion. The reaction mixture was left to react overnight (ca. 18 h) and was then quenched with cold water, leading to the immediate formation of a white precipitate. The organic solvent was removed *in vacuo* and the aqueous phase was extracted with ethyl acetate (3 × 50 mL). The organic phases were collected, washed with brine, dried over Na<sub>2</sub>SO<sub>4</sub> and concentrated *in vacuo*, leaving a yellow oil which was used in the next step without further purification.

### Synthesis of *N*-benzyl-2-(phenylethynyl)aniline

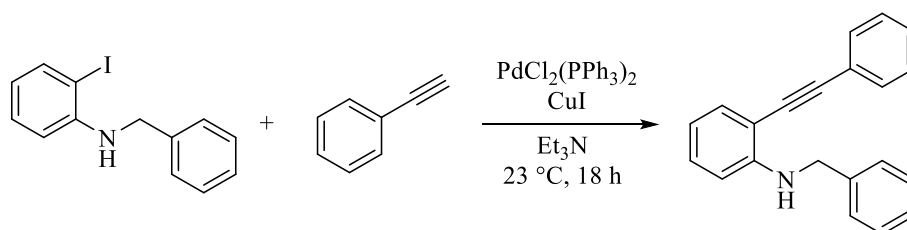

Synthesised in accordance with the procedure by Wang and co-workers.<sup>2</sup> The following procedure was performed under a moisture and oxygen free N<sub>2</sub> atmosphere. A one necked Schlenk round bottom flask was charged with *N*-Benzyl *o*-iodoaniline (2 g, 6.5 mmol, 1 equiv), dissolved in triethylamine (Et<sub>3</sub>N) (26 mL). To this solution, phenylacetylene (1.4 mL, 13 mmol, 2 equiv) was added dropwise. Sequentially, PdCl<sub>2</sub>(PPh<sub>3</sub>)<sub>2</sub> (2.2 mg, 3 μmol, 0.02 equiv) was added and the reaction mixture was stirred for 5 minutes before adding CuI (1.5 mg, 8 μmol, 0.05 equiv). The reaction was left to stir at room temperature until completion (24 h). After



consumption of the starting material, checked by TLC, the solvent was removed under vacuum leading to a dark oil which was passed through a silica plug. The crude reaction mixture was purified by column chromatography using hexane/ethyl acetate (100:0 to 100:10 v/v) as the eluent to afford the desired product as a yellow solid (1.60 g, 87% yield). The spectroscopic data are in agreement with the literature.<sup>2</sup>

#### Synthesis of *N*-benzyl-2-((trimethylsilyl)ethynyl)aniline

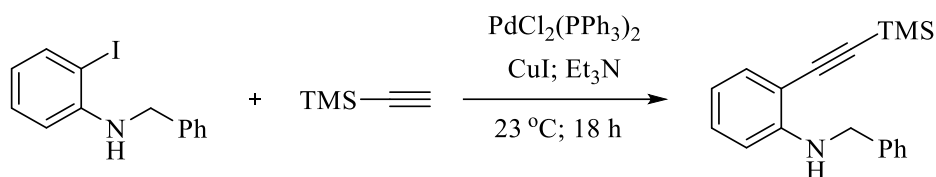

Synthesised in accordance with the procedure illustrated by Wang and co-workers.<sup>2</sup> The following procedure was performed under a moisture and oxygen free N<sub>2</sub> atmosphere. A one necked round bottomed Schlenk flask was charged with *N*-Benzyl *o*-iodoaniline (2 g, 6.5 mmol, 1 equiv) and dissolved in Et<sub>3</sub>N (26 mL). To this solution, trimethylsilylacetylene (1.9 mL, 13 mmol, 2 equiv) was added dropwise. Sequentially, PdCl<sub>2</sub>(PPh<sub>3</sub>)<sub>2</sub> (2 mg, 3 μmol, 0.02 equiv) was added and the reaction mixture was stirred for 5 minutes before adding CuI (2 mg, 8 μmol, 0.05 equiv). The reaction was left to stir at room temperature until completion (18 h). After consumption of the starting material, checked by TLC, the solvent was removed *in vacuo* leading to a dark oil which was passed through a silica plug. The crude reaction mixture was purified by column chromatography using hexane/ethyl acetate (100:0 to 100:5) as the eluent to afford the desired product as a yellow oil (1.6 g, 86% yield). The spectroscopic data are in agreement with the literature.<sup>2</sup>

#### Synthesis of *N*-benzyl-2-ethynylaniline

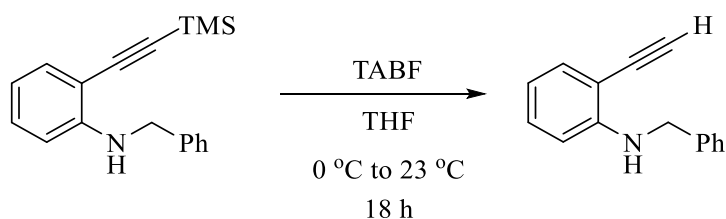

Synthesised in accordance with the procedure illustrated by Wang and co-workers.<sup>2</sup> The following procedure was performed under a moisture and oxygen free N<sub>2</sub> atmosphere. A one necked round bottomed Schlenk flask was charged with *N*-benzyl-2-((trimethylsilyl)ethynyl)aniline (0.7 g, 2.5 mmol, 1 equiv) dissolved in THF (20 mL) and

cooled to 0 °C. To this solution, tetra-*n*-butylammonium fluoride (3 mL, 3 mmol, 1.2 equiv) was added dropwise. The reaction mixture was stirred until completion (18 h). After consumption of the starting material, checked by TLC, water was added to the reaction mixture, leading to the formation of a white precipitate. The ethereal solvent was removed *in vacuo* and the aqueous phase was extracted with ethyl acetate (3 × 10 mL). The organic phases were then collected, washed with brine, dried over Na<sub>2</sub>SO<sub>4</sub> and concentrated *in vacuo* to give a golden yellow oil which was purified by column chromatography using hexane:ethyl acetate (100:0 to 100:5 v/v) as the eluent affording the desired product as a yellow oil (0.33 g, 63% yield). The spectroscopic data are in agreement with the literature.<sup>2</sup>

## 2.5 Synthesis and spectral characterisation of C3 C–H amidated products

### Synthesis of *N*-(4-chlorophenyl)-1-methyl-1*H*-indole-3-carboxamide (**1a**)<sup>3</sup>

Synthesised in accordance with *General Procedure a* using B(C<sub>6</sub>F<sub>5</sub>)<sub>3</sub> (15 mg, 0.03 mmol), 4-chlorophenyl isocyanate (23 mg, 0.15 mmol), and *N*-methylindole (13 μL, 0.1 mmol) in TFT to afford **1a**. The crude reaction mixture was purified *via* preparative thin layer chromatography using hexane/ethyl acetate as eluent. The desired compound **1a** was obtained as a white solid. Yield: 11 mg, 0.04 mmol, 39%.

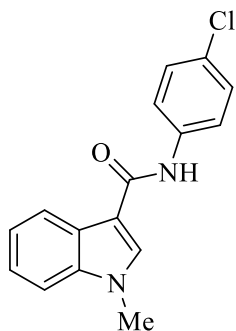

<sup>1</sup>H NMR (500 MHz, CDCl<sub>3</sub>, 298 K) δ: 7.92 (d, *J* = 7.8 Hz, 1H, Ar–CH), 7.71 (br., s, 1H, NH), 7.67 (s, 1H, CH), 7.54–7.46 (m, 2H, Ar–CH), 7.40–7.27 (m, 3H, Ar–CH), 7.25–7.20 (m, 2H, Ar–CH), 3.73 (s, 3H, NMe); <sup>13</sup>C NMR (126 MHz, CDCl<sub>3</sub>, 298 K) δ: 163.7, 137.4, 136.7, 133.3, 129.13, 129.10, 125.0, 123.1, 122.1, 121.5, 119.7, 110.6, 110.3, 33.39. Data agrees with literature values.<sup>3</sup>

### Synthesis of *N*-(phenyl)-1-methyl-1*H*-indole-3-carboxamide (**1b**)<sup>3</sup>

Synthesised in accordance with *General Procedure a* using B(C<sub>6</sub>F<sub>5</sub>)<sub>3</sub> (15 mg, 0.03 mmol), phenyl isocyanate (16 μL, 0.15 mmol), and *N*-methylindole (13 μL, 0.1 mmol) in TFT to afford **1b**. The crude reaction mixture was purified *via* preparative thin layer chromatography using hexane/ethyl acetate as eluent. The desired compound **1b** was obtained as a white solid. Yield: 15 mg, 0.06 mmol, 58%.

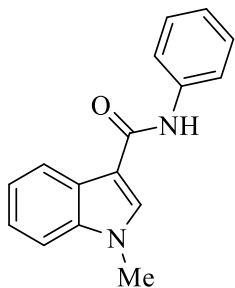

<sup>1</sup>H NMR (500 MHz, CDCl<sub>3</sub>, 298 K) δ: 8.06–8.04 (m, 1H, Ar–CH), 7.76 (br., s, 1H, NH), 7.73 (s, 1H, CH), 7.68–7.64 (m, 2H, Ar–CH), 7.40–7.29 (m, 5H, Ar–CH), 7.12 (t, *J* = 7.4 Hz, 1H, Ar–CH), 3.79 (s, 3H, NMe); <sup>13</sup>C NMR (126 MHz, CDCl<sub>3</sub>, 298 K) δ:

163.3, 138.6, 137.5, 132.8, 129.2, 125.5, 124.1, 123.0, 121.9, 120.19, 120.16, 111.2, 110.4, 33.5. Data agrees with literature values.<sup>3</sup>

#### Synthesis of 1-methyl-N-(naphthalen-1-yl)-1H-indole-3-carboxamide (**1c**)

Synthesised in accordance with *General Procedure a* using B(C<sub>6</sub>F<sub>5</sub>)<sub>3</sub> (15 mg, 0.03 mmol), 1-naphthyl isocyanate (22  $\mu$ L, 0.15 mmol), and *N*-methylindole (13  $\mu$ L, 0.1 mmol) in TFT to afford **1c**. The crude reaction mixture was purified *via* preparative thin layer chromatography using hexane/ethyl acetate as eluent. The desired compound **1c** was obtained as a white solid. Yield: 14 mg, 0.05 mmol, 47%.

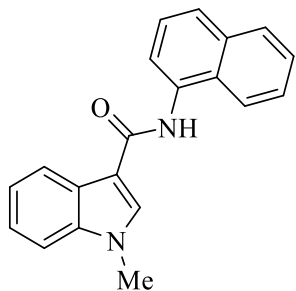

<sup>1</sup>H NMR (500 MHz, CDCl<sub>3</sub>, 298 K)  $\delta$ : 8.17–8.03 (m, 3H, Ar–CH), 7.99 (d, *J* = 7.4 Hz, 1H, Ar–CH), 7.90 (d, *J* = 7.5 Hz, 1H, Ar–CH), 7.82 (s, 1H, CH), 7.73 (d, *J* = 8.1 Hz, 1H, Ar–CH), 7.59–7.48 (m, overlapped Ar–CH and NH, 3H), 7.44 (d, *J* = 7.6 Hz, 1H, Ar–CH), 7.40–7.30 (m, 2H, Ar–CH), 3.87 (s, 3H, NMe); <sup>13</sup>C NMR (126 MHz, CDCl<sub>3</sub>, 298 K)  $\delta$ : 164.0, 137.6, 134.4, 133.12, 133.05, 129.0, 127.6, 126.5, 126.09, 126.06, 125.6, 125.59, 123.0, 122.1, 121.1, 121.0, 120.3, 111.2, 110.5, 33.6; IR  $\nu_{\text{max}}$  (cm<sup>-1</sup>): 3292, 3049, 1635 (C=O); 1524, 1496, 1462, 1227, 1111, 744. HRMS (ES<sup>+</sup>) [M+H]<sup>+</sup> [C<sub>20</sub>H<sub>17</sub>N<sub>2</sub>O]<sup>+</sup>: calculated 301.1341, found 301.1342.

#### Synthesis of *N*-(4-methoxyphenyl)-1-methyl-1H-indole-3-carboxamide (**1d**)<sup>3</sup>

Synthesised in accordance with *General Procedure a* using B(C<sub>6</sub>F<sub>5</sub>)<sub>3</sub> (15 mg, 0.03 mmol), 4-methoxyphenyl isocyanate (19  $\mu$ L, 0.15 mmol), *N*-methylindole (13  $\mu$ L, 0.1 mmol) in TFT to afford **1d**. The crude reaction mixture was purified *via* preparative thin layer chromatography using hexane/ethyl acetate as eluent. The desired compound **1d** was obtained as a white solid. Yield: 11 mg, 0.04 mmol, 39%.

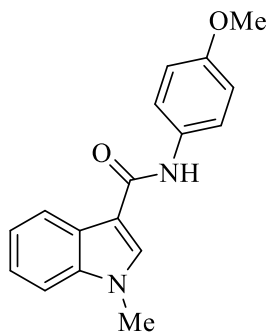

<sup>1</sup>H NMR (500 MHz, CDCl<sub>3</sub>, 298 K)  $\delta$ : 7.82 (d, *J* = 7.9 Hz, 1H, Ar–CH), 7.64 (s, 1H, CH), 7.55 (br., s, 1H, NH), 7.38–7.24 (m, 5H, Ar–CH), 6.76 (d, *J* = 8.9 Hz, 2H, Ar–CH), 3.68 (s, 3H, OMe), 3.65 (s, 3H, NMe); <sup>13</sup>C NMR (126 MHz, CDCl<sub>3</sub>, 298 K)  $\delta$ : 164.4, 157.0, 137.4, 133.4, 130.3, 124.8, 123.1, 123.0, 122.1, 119.3, 114.4, 110.7, 110.1, 55.5, 33.2. Data agrees with literature values.<sup>3</sup>

### Synthesis of 1,2-dimethyl-N-(4-(trifluoromethyl)phenyl)-1H-indole-3-carboxamide (**1e**)

Synthesised in accordance with *General Procedure a* using B(C<sub>6</sub>F<sub>5</sub>)<sub>3</sub> (15 mg, 0.03 mmol), 4-(trifluoromethyl)phenyl isocyanate (21 μL, 0.15 mmol), and 1,2-dimethylindole (15 mg, 0.1 mmol) in TFT to afford **1e**. The crude reaction mixture was purified *via* preparative thin layer chromatography using hexane/ethyl acetate as eluent. The desired compound **1e** was obtained as a white solid. Yield: 11 mg, 0.03 mmol, 33%.

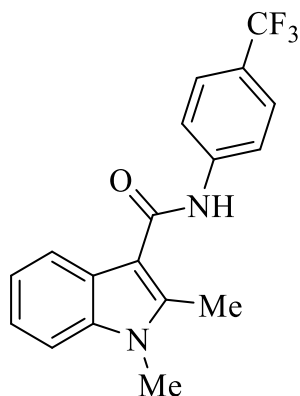

<sup>1</sup>H NMR (500 MHz, CDCl<sub>3</sub>, 298 K) δ: 7.90 (br., s, 1H, NH), 7.81–7.72 (m, 3H, Ar–CH), 7.62 (d, *J* = 8.5 Hz, 2H, Ar–CH), 7.39–7.37 (m, 1H, Ar–CH), 7.32–7.27 (m, 2H, Ar–CH), 3.70 (s, 3H, NMe), 2.75 (s, 3H, Me); <sup>13</sup>C NMR (126 MHz, CDCl<sub>3</sub>, 298 K) δ: 164.7, 143.9, 141.8, 136.7, 126.5, 126.5 (q, *J*<sub>C–F</sub> = 3.7 Hz), 125.6 (q, *J*<sub>C–F</sub> = 32.5 Hz), 124.7, 124.3 (q, *J*<sub>C–F</sub> = 272.7 Hz), 122.3, 121.9, 119.4, 118.3, 118.2, 110.2, 107.4, 29.8, 11.8 (Me); <sup>19</sup>F NMR (471 MHz, CDCl<sub>3</sub>, 298 K) δ: -61.91; IR *v*<sub>max</sub> (cm<sup>-1</sup>): 3292, 1643 (C=O), 1599, 1522, 1406, 1319, 1111, 1067. HRMS (CI) [M+H]<sup>+</sup> [C<sub>18</sub>H<sub>16</sub>F<sub>3</sub>N<sub>2</sub>O]<sup>+</sup>: calculated 333.1209, found 333.1208.

### Synthesis of N-(4-chlorophenyl)-1,2-dimethyl-1H-indole-3-carboxamide (**1f**)

Synthesised in accordance with *General Procedure a* using B(C<sub>6</sub>F<sub>5</sub>)<sub>3</sub> (15 mg, 0.03 mmol), 4-chlorophenyl isocyanate (23 mg, 0.15 mmol), and 1,2-dimethylindole (15 mg, 0.1 mmol) in TFT to afford **1f**. The crude reaction mixture was purified *via* preparative thin layer chromatography using hexane/ethyl acetate as eluent. The desired compound **1f** was obtained as a white solid. Yield: 13 mg, 0.04 mmol, 43%.

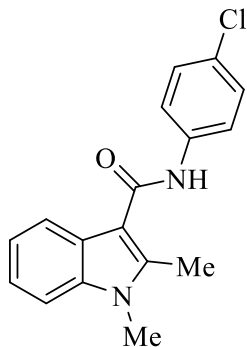

<sup>1</sup>H NMR (500 MHz, CDCl<sub>3</sub>, 298 K) δ: 7.77–7.74 (m, 1H, Ar–CH), 7.71 (br., s, 1H, NH), 7.60 (d, *J* = 8.8 Hz, 2H, Ar–CH), 7.40–7.36 (m, 1H, Ar–CH), 7.33 (d, *J* = 8.8 Hz, 2H, Ar–CH), 7.30–7.24 (m, 2H, Ar–CH), 3.72 (s, 3H, NMe), 2.76 (s, 3H, Me); <sup>13</sup>C NMR (126 MHz, CDCl<sub>3</sub>, 298 K) δ: 164.5, 143.5, 137.4, 136.7, 129.1, 128.7, 124.9, 122.1, 121.7, 121.1, 118.3, 110.0, 107.6, 29.7, 11.7; IR *v*<sub>max</sub> (cm<sup>-1</sup>): 3287, 1634 (C=O), 1591, 1491, 1404. HRMS (EI) [M] [C<sub>17</sub>H<sub>15</sub>Cl<sup>35</sup>N<sub>2</sub>O]: calculated 298.0867, found 298.0865.

### Synthesis of 1,2-dimethyl-N-phenyl-1H-indole-3-carboxamide (**1g**)

Synthesised in accordance with *General Procedure a* using  $B(C_6F_5)_3$  (15 mg, 0.03 mmol), phenyl isocyanate (16  $\mu$ L, 0.15 mmol), and 1,2-dimethylindole (15 mg, 0.1 mmol) in TFT to afford **1g**. The crude reaction mixture was purified *via* preparative thin layer chromatography using hexane/ethyl acetate as eluent. The desired compound **1g** was obtained as a white solid. Yield: 13 mg, 0.05 mmol, 49%.

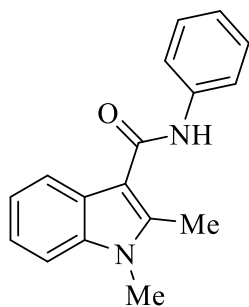

$^1H$  NMR (500 MHz,  $CDCl_3$ , 298 K)  $\delta$ : 7.82–7.77 (m, 1H, Ar–CH), 7.72 (br., s, 1H, NH), 7.65 (d,  $J = 7.5$  Hz, 2H, Ar–CH), 7.42–7.34 (m, 3H, Ar–CH), 7.31–7.26 (m, 2H, Ar–CH), 7.13 (t,  $J = 7.4$  Hz, 1H, Ar–CH), 3.72 (s, 3H, NMe), 2.77 (s, 3H, Me);  $^{13}C$  NMR (126 MHz,  $CDCl_3$ , 298 K)  $\delta$ : 164.7 (C=O), 143.3, 138.6, 136.6, 129.2, 124.9, 124.1, 122.1, 121.6, 120.1, 118.3, 110.0, 107.8, 29.7, 11.7; IR  $\nu_{max}$  ( $cm^{-1}$ ): 3285, 1638 (C=O), 1595, 1535, 1499, 1437, 1312. HRMS (EI) [M] [ $C_{17}H_{16}N_2O$ ]: calculated 264.1257, found 264.1255.

### Synthesis of N-(4-methoxyphenyl)-1,2-dimethyl-1H-indole-3-carboxamide (**1h**)

Synthesised in accordance with *General Procedure a* using  $B(C_6F_5)_3$  (15 mg, 0.03 mmol), 4-methoxyphenyl isocyanate (19  $\mu$ L, 0.15 mmol), and 1,2-dimethylindole (15 mg, 0.1 mmol) in TFT to afford **1h**. The crude reaction mixture was purified *via* preparative thin layer chromatography using hexane/ethyl acetate as eluent. The desired compound **1h** was obtained as a white solid. Yield: 7 mg, 0.02 mmol, 24%.

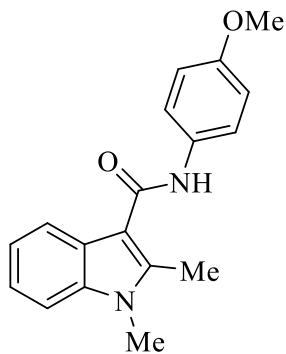

$^1H$  NMR (500 MHz,  $CDCl_3$ , 298 K)  $\delta$ : 7.81–7.77 (m, 1H, Ar–CH), 7.63 (br., s, 1H, NH), 7.55 (d,  $J = 9.0$  Hz, 2H, Ar–CH), 7.39–7.34 (m, 1H, Ar–CH), 7.30–7.23 (m, 2H, Ar–CH), 6.92 (d,  $J = 9.0$  Hz, 2H, Ar–CH), 3.82 (s, 3H, OMe), 3.72 (s, 3H, NMe), 2.76 (s, 3H, Me);  $^{13}C$  NMR (126 MHz,  $CDCl_3$ , 298 K)  $\delta$ : 164.5, 156.3, 143.1, 136.6, 131.7, 125.0, 122.0, 121.9, 121.5, 118.4, 114.3, 109.9, 107.8, 55.7, 29.7, 11.7; IR  $\nu_{max}$  ( $cm^{-1}$ ): 3277, 1633 (C=O), 1508, 1408, 1233, 1161, 1105, 1032. HRMS (CI) [ $M+H$ ] $^+$  [ $C_{18}H_{19}N_2O_2$ ] $^+$ : calculated 295.1441, found 295.1443.

### Synthesis of 5-bromo-1-methyl-N-phenyl-1H-indole-3-carboxamide (**1i**)

Synthesised in accordance with *General Procedure a* using  $B(C_6F_5)_3$  (15 mg, 0.03 mmol), phenyl isocyanate (16  $\mu$ L, 0.15 mmol), and 5-bromo-1-methylindole (21 mg, 0.1 mmol) in TFT to afford **1i**. The crude reaction mixture was purified *via* preparative thin layer chromatography using hexane/ethyl acetate as eluent. The desired compound **1i** was obtained as a white solid. Yield: 11 mg, 0.03 mmol, 33%.

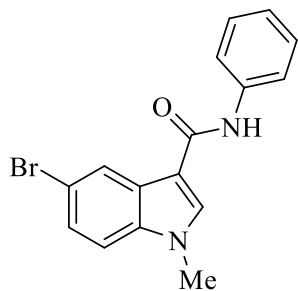

$^1H$  NMR (500 MHz,  $CDCl_3$ , 298 K)  $\delta$ : 8.27 (d,  $J = 1.8$  Hz, 1H), 7.68 (s, 1H, CH), 7.64 (d,  $J = 7.6$  Hz, 2H, Ar-CH), 7.55 (br., s, 1H, NH), 7.44–7.36 (m, 3H, Ar-CH), 7.28–7.23 (m, 1H, Ar-CH), 7.14 (t,  $J = 7.4$  Hz, 1H), 3.83 (s, 3H, NMe);  $^{13}C$  NMR (126 MHz,  $CDCl_3$ , 298 K)  $\delta$ : 162.8, 138.3, 136.1, 132.7, 129.2, 127.4, 126.1, 124.3, 123.4, 120.9, 120.3, 115.6, 111.7, 33.7; IR  $\nu_{max}$  ( $cm^{-1}$ ): 3298, 1636 (C=O), 1597, 1528, 1466, 1240, 1111. HRMS (ES+)  $[M+H]^+$   $[C_{16}H_{14}BrN_2O]^+$ : calculated 329.0290, found 329.0290.

### Synthesis of N-(4-methoxyphenyl)-1-methyl-2-phenyl-1H-indole-3-carboxamide (**1j**)

Synthesised in accordance with *General Procedure a* using  $B(C_6F_5)_3$  (15 mg, 0.03 mmol), 4-methoxyphenyl isocyanate (19  $\mu$ L, 0.15 mmol), and 1-methyl-2-phenylindole (21 mg, 0.1 mmol) in TFT to afford **1j**. The crude reaction mixture was purified *via* preparative thin layer chromatography using hexane/ethyl acetate as eluent. The desired compound **1j** was obtained as a white solid. Yield: 13 mg, 0.04 mmol, 36%.

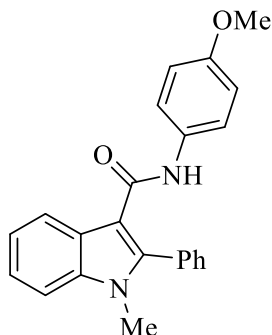

$^1H$  NMR (500 MHz,  $CDCl_3$ , 298 K)  $\delta$ : 8.50–8.46 (m, 1H, Ar-CH), 7.68–7.61 (m, 3H, Ar-CH), 7.58–7.54 (m, 2H, Ar-CH), 7.41–7.31 (m, 3H, Ar-CH), 7.09 (d,  $J = 9.0$  Hz, 2H, Ar-CH), 6.91 (br., s, 1H, NH), 6.76 (d,  $J = 9.0$  Hz, 2H, Ar-CH), 3.75 (s, 3H, OMe), 3.58 (s, 3H, NMe);  $^{13}C$  NMR (126 MHz,  $CDCl_3$ , 298 K)  $\delta$ : 163.1, 155.8, 141.1, 137.0, 131.9, 131.1, 131.0, 130.4, 129.7, 127.3, 123.3, 122.4, 122.2, 120.9, 114.1, 109.7, 109.4, 55.6, 31.0; IR  $\nu_{max}$  ( $cm^{-1}$ ): 3292, 3265, 3118, 3048, 2814, 1635 (C=O), 1523, 1496, 1396, 1375, 1335, 1247, 1155, 1128, 1084, 1010. HRMS (ES+)  $[M+H]^+$   $[C_{23}H_{21}N_2O_2]^+$ : calculated 357.1609, found 357.1603.

### Synthesis of *N*-(4-chlorophenyl)-1,2,5-trimethyl-1*H*-pyrrole-3-carboxamide (**1k**)

Synthesised in accordance with *General Procedure a* using  $B(C_6F_5)_3$  (15 mg, 0.03 mmol), 4-chlorophenyl isocyanate (23 mg, 0.15 mmol), and 1,2,5-trimethylpyrrole (14  $\mu$ L, 0.1 mmol) in TFT to afford **1k**. The crude reaction mixture was purified *via* preparative thin layer chromatography using hexane/ethyl acetate as eluent. The desired compound **1k** was obtained as a white solid. Yield: 13 mg, 0.05 mmol, 50%.

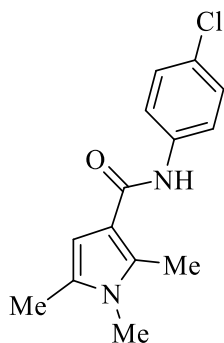

$^1H$  NMR (500 MHz,  $CDCl_3$ , 298 K)  $\delta$ : 7.55–7.50 (m, 2H, Ar–CH), 7.45 (br., s, 1H, NH), 7.28–7.22 (m, 2H, Ar–CH), 6.05 (s, 1H, CH), 3.39 (s, 3H, NMe), 2.54 (s, 3H, Me), 2.20 (s, 3H, Me);  $^{13}C$  NMR (126 MHz,  $CDCl_3$ , 298 K)  $\delta$ : 164.2, 137.5, 134.8, 128.9, 128.3, 128.2, 121.1, 113.2, 103.7, 30.3, 12.5, 11.4; IR  $\nu_{max}$  ( $cm^{-1}$ ): 3294, 2910, 1636 (C=O), 1589, 1530, 1508, 1301, 1242, 826. HRMS (ES+)  $[M+H]^+$   $[C_{14}H_{16}ClN_2O]^+$ : calculated 263.0951, found 263.0950.

### Synthesis of 1,2,5-trimethyl-*N*-phenyl-1*H*-pyrrole-3-carboxamide (**1l**)

Synthesised in accordance with *General Procedure a* using  $B(C_6F_5)_3$  (15 mg, 0.03 mmol), phenyl isocyanate (16  $\mu$ L, 0.15 mmol), and 1,2,5-trimethylpyrrole (14  $\mu$ L, 0.1 mmol) in TFT to afford **1l**. The crude reaction mixture was purified *via* preparative thin layer chromatography using hexane/ethyl acetate as eluent. The desired compound **1l** was obtained as a white solid. Yield: 8 mg, 0.04 mmol, 35%.

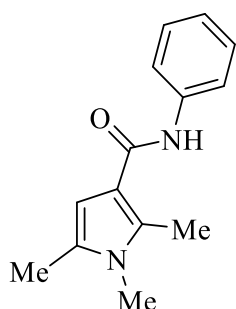

$^1H$  NMR (500 MHz,  $CDCl_3$ , 298 K)  $\delta$ : 7.60–7.55 (m, 2H, Ar–CH), 7.42 (br, s, 1H, NH), 7.34–7.29 (m, 2H, Ar–CH), 7.09–7.04 (m, 1H, Ar–CH), 6.07 (s, 1H, CH), 3.40 (s, 3H, NMe), 2.56 (s, 3H, Me), 2.22 (s, 3H, Me);  $^{13}C$  NMR (126 MHz,  $CDCl_3$ , 298 K)  $\delta$ : 164.4 (C=O), 138.8, 134.6, 129.0, 128.2, 123.6, 120.0, 113.6, 103.8, 30.3 (NMe), 12.5 (Me), 11.5 (Me); IR  $\nu_{max}$  ( $cm^{-1}$ ): 3337, 2911, 1634 (C=O), 1595, 1533, 1497, 1305, 1244. HRMS (ES+)  $[M+H]^+$   $[C_{14}H_{17}N_2O]^+$ : calculated 229.1341, found 229.1338.

### Synthesis of 1,2,5-trimethyl-N-(naphthalen-1-yl)-1H-pyrrole-3-carboxamide (**1m**)

Synthesised in accordance with *General Procedure a* using  $B(C_6F_5)_3$  (15 mg, 0.03 mmol), 1-naphthyl isocyanate (22  $\mu$ L, 0.15 mmol), and 1,2,5-trimethylpyrrole (14  $\mu$ L, 0.1 mmol) in TFT to afford **1m**. The crude reaction mixture was purified *via* preparative thin layer chromatography using hexane/ethyl acetate as eluent. The desired compound **1m** was obtained as a white solid. Yield: 15 mg, 0.05 mmol, 52%.

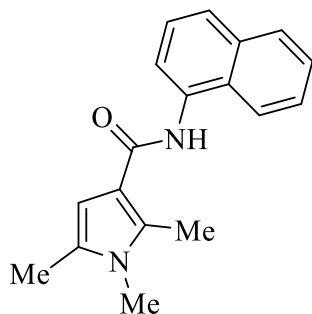

$^1H$  NMR (500 MHz,  $CDCl_3$ , 298 K)  $\delta$ : 8.07 (d,  $J = 7.5$  Hz, 1H, Ar-CH), 7.91 (d,  $J = 8.0$  Hz, 1H, Ar-CH), 7.88–7.85 (m, 1H, Ar-CH), 7.83 (br., s, 1H, NH), 7.67 (d,  $J = 8.2$  Hz, 1H, Ar-CH), 7.56–7.44 (m, 3H, Ar-CH), 6.22 (s, 1H, CH), 3.44 (s, 3H, NMe), 2.61 (s, 3H, Me), 2.27 (s, 3H, Me);  $^{13}C$  NMR (126 MHz,  $CDCl_3$ , 298 K)  $\delta$ : 164.6, 134.8, 134.3, 133.3, 128.9, 128.3, 127.4, 126.2, 126.1, 125.9, 125.0, 120.9, 120.5, 113.6, 103.8, 30.4, 12.6, 11.5; IR  $\nu_{max}$  ( $cm^{-1}$ ): 3277, 3051, 3916, 1637 (C=O), 1521, 1487, 1396, 1250, 769. HRMS (CI) [M] [ $C_{18}H_{18}N_2O$ ]: calculated 278.1414, found 278.1416.

### Synthesis of N-(4-methoxyphenyl)-1,2,5-trimethyl-1H-pyrrole-3-carboxamide (**1n**)

Synthesised in accordance with *General Procedure a* using  $B(C_6F_5)_3$  (15 mg, 0.03 mmol), 4-methoxyphenyl isocyanate (19  $\mu$ L, 0.15 mmol), and 1,2,5-trimethylpyrrole (14  $\mu$ L, 0.1 mmol) in TFT to afford **1n**. The crude reaction mixture was purified *via* preparative thin layer chromatography using hexane/ethyl acetate as eluent. The desired compound **1n** was obtained as a white solid. Yield: 11 mg, 0.04 mmol, 42%.

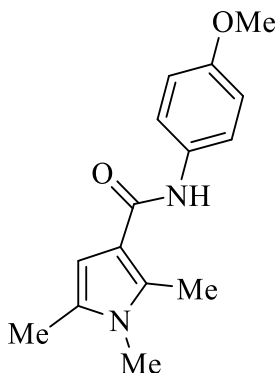

$^1H$  NMR (500 MHz,  $CDCl_3$ , 298 K)  $\delta$ : 7.42–7.36 (m, 2H, Ar-CH), 7.32 (br., s, 1H, NH), 6.86–6.80 (m, 2H, Ar-CH), 6.03 (s, 1H, CH), 3.76 (s, 3H, OMe), 3.39 (s, 3H, NMe), 2.50 (s, 3H, Me), 2.21 (s, 3H, Me);  $^{13}C$  NMR (126 MHz,  $CDCl_3$ , 298 K)  $\delta$ : 164.6, 156.2, 134.2, 131.6, 128.2, 122.3, 114.2, 113.4, 103.8, 55.6, 30.3, 12.5, 11.4; IR  $\nu_{max}$  ( $cm^{-1}$ ): 3331, 2934, 1638 (C=O), 1508, 1460, 1410, 1233. HRMS (ES+) [ $M+H$ ] $^+$  [ $C_{15}H_{19}N_2O_2$ ] $^+$ : calculated 259.1447, found 259.1441.



### Synthesis of *N*-(4-chlorophenyl)-1-methyl-1*H*-pyrrole-3-carboxamide (**1o'**)

Synthesised in accordance with *General Procedure a* using  $B(C_6F_5)_3$  (15 mg, 0.03 mmol), 4-chlorophenyl isocyanate (23 mg, 0.15 mmol), and *N*-methylpyrrole (9  $\mu$ L, 0.1 mmol) in TFT to afford **1o'**. The crude reaction mixture was purified *via* preparative thin layer chromatography using hexane/ethyl acetate as eluent. The desired compound **1o'** was obtained as a white solid. Yield: 3 mg, 0.01 mmol, 13%.

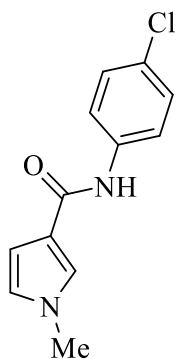

$^1H$  NMR (500 MHz,  $CDCl_3$ , 298 K)  $\delta$ : 7.57–7.51 (m, 2H, Ar–CH), 7.44 (br., s, 1H, NH), 7.30–7.25 (m, overlapped, Ar–CH and pyrrole CH, 3H), 6.61 (t,  $J = 2.5$  Hz, 1H, pyrrole CH), 6.45–6.40 (m, 1H, pyrrole CH), 3.69 (s, 3H, NMe);  $^{13}C$  NMR (126 MHz,  $CDCl_3$ , 298 K)  $\delta$ : 162.8, 137.1, 129.1, 128.8, 125.5, 123.2, 121.2, 119.8, 107.2, 36.8; IR  $\nu_{max}$  ( $cm^{-1}$ ): 3296, 3121, 2924, 1643, 1591, 1537, 1510, 1491, 1464, 1400, 1090. HRMS (APCI)  $[M+H]^+$  [ $C_{12}H_{12}ClN_2O$ ] $^+$ : calculated 235.0638, found 235.0641.

### Synthesis of *N*-(4-chlorophenyl)-1-methyl-1*H*-pyrrole-2-carboxamide (**1o**)<sup>4</sup>

Synthesised in accordance with *General Procedure a* using  $B(C_6F_5)_3$  (15 mg, 0.03 mmol), 4-chlorophenyl isocyanate (23 mg, 0.15 mmol), and *N*-methylpyrrole (9  $\mu$ L, 0.1 mmol) in TFT to afford **1o**. The crude reaction mixture was purified *via* preparative thin layer chromatography using hexane/ethyl acetate as eluent. The desired compound **1o** was obtained as a light-yellow solid. Yield: 5 mg, 0.02 mmol, 21%.

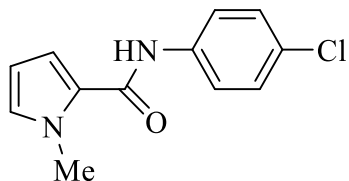

$^1H$  NMR (500 MHz,  $CDCl_3$ , 298 K)  $\delta$ : 7.59 (br., s, 1H, NH), 7.53–7.48 (m, 2H, Ar–CH), 7.32–7.27 (m, 2H, Ar–CH), 6.80–6.78 (m, 1H, pyrrole CH), 6.69 (dd,  $J = 4.0, 1.7$  Hz, 1H, pyrrole CH), 6.14 (dd,  $J = 4.0, 2.6$  Hz, 1H, pyrrole CH), 3.97 (s, 3H, NMe);  $^{13}C$  NMR (126 MHz,  $CDCl_3$ , 298 K)  $\delta$ : 159.9, 136.8, 129.22, 129.15, 129.0, 125.5, 121.3, 112.5, 107.7, 37.0. Data agrees with literature values.<sup>4</sup>

#### Synthesis of 1-methyl-N-phenyl-1H-pyrrole-3-carboxamide (**1p'**)<sup>5</sup>

Synthesised in accordance with *General Procedure a* using B(C<sub>6</sub>F<sub>5</sub>)<sub>3</sub> (15 mg, 0.03 mmol), phenyl isocyanate (16  $\mu$ L, 0.15 mmol), and *N*-methylpyrrole (9  $\mu$ L, 0.1 mmol) in TFT to afford **1p'**. The crude reaction mixture was purified *via* preparative thin layer chromatography using hexane/ethyl acetate as eluent. The desired compound **1p'** was obtained as a light-yellow solid. Yield: 4 mg, 0.02 mmol, 20%.

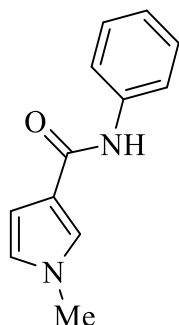

<sup>1</sup>H NMR (500 MHz, CDCl<sub>3</sub>, 298 K)  $\delta$ : 7.60 (d,  $J$  = 7.8 Hz, 2H, Ar-CH), 7.44 (br., s, 1H, NH), 7.36–7.30 (m, 2H, Ar-CH), 7.29–7.27 (m, 1H, Ar-CH), 7.09 (t,  $J$  = 7.4 Hz, 1H, pyrrole CH), 6.61 (t,  $J$  = 2.5 Hz, 1H, pyrrole CH), 6.44 (t,  $J$  = 2.2 Hz, 1H, pyrrole CH), 3.70 (s, 3H, NMe); <sup>13</sup>C NMR (126 MHz, CDCl<sub>3</sub>, 298 K)  $\delta$ : 162.8, 138.5, 129.3, 129.1, 125.4, 123.9, 123.1, 120.0, 107.2, 36.8. Data agrees with literature values.<sup>5</sup>

#### Synthesis of 1-methyl-N-phenyl-1H-pyrrole-2-carboxamide (**1p**)<sup>6</sup>

Synthesised in accordance with *General Procedure a* using B(C<sub>6</sub>F<sub>5</sub>)<sub>3</sub> (15 mg, 0.03 mmol), phenyl isocyanate (16  $\mu$ L, 0.15 mmol), and *N*-methylpyrrole (9  $\mu$ L, 0.1 mmol) in TFT to afford **1p**. The crude reaction mixture was purified *via* preparative thin layer chromatography using hexane/ethyl acetate as eluent. The desired compound **1p** was obtained as a white solid.

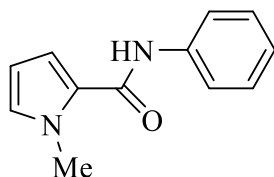

Yield: 10 mg, 0.05 mmol, 50%.

<sup>1</sup>H NMR (500 MHz, CDCl<sub>3</sub>, 298 K)  $\delta$ : 7.58 (br., s, 1H, NH), 7.57–7.53 (m, 2H, Ar-CH), 7.37–7.31 (m, 2H, Ar-CH), 7.13–7.09 (m, 1H, Ar-CH), 6.79 (t,  $J$  = 2.1, 1H, pyrrole CH), 6.70 (dd,  $J$  = 4.0, 1.7 Hz, 1H, pyrrole CH), 6.15 (dd,  $J$  = 3.8, 2.6 Hz, 1H, pyrrole CH), 3.98 (s, 3H, NMe); <sup>13</sup>C NMR (126 MHz, CDCl<sub>3</sub>, 298 K)  $\delta$ : 160.0, 138.2, 129.2, 129.0, 125.9, 124.2, 120.1, 112.3, 107.6, 37.0. Data agrees with literature values.<sup>6</sup>

#### Synthesis of *N*-(4-methoxyphenyl)-1-methyl-1H-pyrrole-2-carboxamide (**1q**)<sup>4</sup>

Synthesised in accordance with *General Procedure a* using B(C<sub>6</sub>F<sub>5</sub>)<sub>3</sub> (15 mg, 0.03 mmol), 4-methoxyphenyl isocyanate (19  $\mu$ L, 0.15 mmol), and *N*-methylpyrrole (9  $\mu$ L, 0.1 mmol) in TFT to afford **1q**. The crude reaction mixture was purified *via* preparative thin layer chromatography using hexane/ethyl acetate as eluent. The desired compound **1q** was obtained as a pale-yellow solid. Yield: 4 mg, 0.02 mmol, 17%.

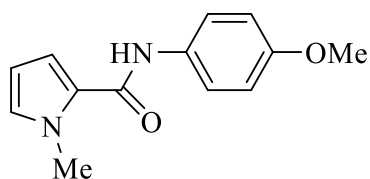

$^1\text{H}$  NMR (500 MHz,  $\text{CDCl}_3$ , 298 K)  $\delta$ : 7.49 (br., s, 1H, NH), 7.47–7.42 (m, 2H, Ar–CH), 6.92–6.86 (m, 2H, Ar–CH), 6.77 (t,  $J = 2.1$ , 1H, pyrrole CH), 6.67 (dd,  $J = 4.0, 1.7$  Hz, 1H, pyrrole CH), 6.13 (dd,  $J = 3.9, 2.6$  Hz, 1H, pyrrole CH), 3.97 (s, 3H, NMe), 3.80 (s, 3H, OMe);  $^{13}\text{C}$  NMR (126 MHz,  $\text{CDCl}_3$ , 298 K)  $\delta$ : 160.1, 156.5, 131.2, 128.7, 126.0, 122.2, 114.4, 112.0, 107.6, 55.7, 37.0. Data agrees with literature values.<sup>4</sup>

*Synthesis of N-(4-chlorophenyl)-1-methyl-1H-indole-3-carboxamide-B(C<sub>6</sub>F<sub>5</sub>)<sub>3</sub> adduct (1a•B(C<sub>6</sub>F<sub>5</sub>)<sub>3</sub>)*

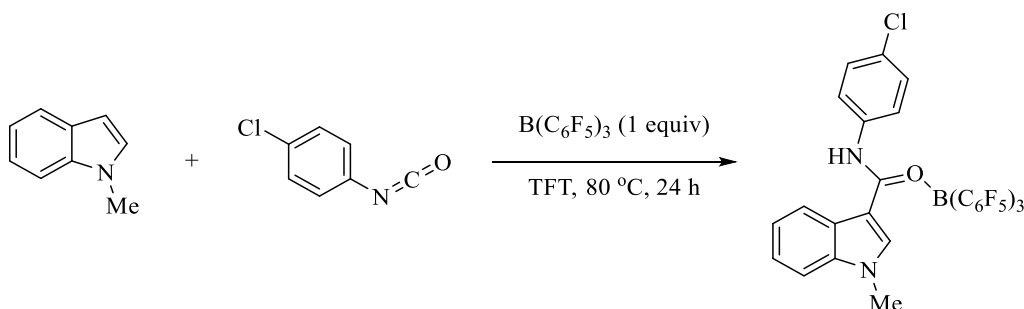

Synthesised in accordance with *General Procedure a* using  $\text{B}(\text{C}_6\text{F}_5)_3$  (1 equiv, 51 mg, 0.1 mmol), 4-chlorophenyl isocyanate (2 equiv, 31 mg, 0.20 mmol), and *N*-methylindole (1 equiv, 12  $\mu\text{L}$ , 0.1 mmol,) in TFT to afford **1a**• $\text{B}(\text{C}_6\text{F}_5)_3$ . The reaction mixture was kept inside the glovebox for crystallisation. After several days, light pink crystals formed. The crystals were collected and washed with pentane. Yield: 36 mg, 0.05 mmol, 45%.

$^1\text{H}$  NMR (500 MHz,  $\text{CDCl}_3$ , 298 K)  $\delta$ : 7.78 (br., s, 1H, NH), 7.72 (d,  $J = 7.9$  Hz, 1H, Ar–CH), 7.66 (s, 1H, CH), 7.46–7.32 (m, 7H, Ar–CH), 3.84 (s, 3H, NMe);  $^{11}\text{B}$  NMR (128 MHz,  $\text{CDCl}_3$ , 298 K)  $\delta$ : -1.67;  $^{19}\text{F}$  NMR (471 MHz,  $\text{CDCl}_3$ , 298 K)  $\delta$ : -135.15 (d,  $J = 20.0$  Hz, 2F), -157.06 (t,  $J = 19.8$  Hz, 1F), -163.72 (t,  $J = 18.4$  Hz, 2F).

*Synthesis of 1-methyl-N-phenyl-1H-indole-3-carboxamide-B(C<sub>6</sub>F<sub>5</sub>)<sub>3</sub> adduct (1b•B(C<sub>6</sub>F<sub>5</sub>)<sub>3</sub>).*

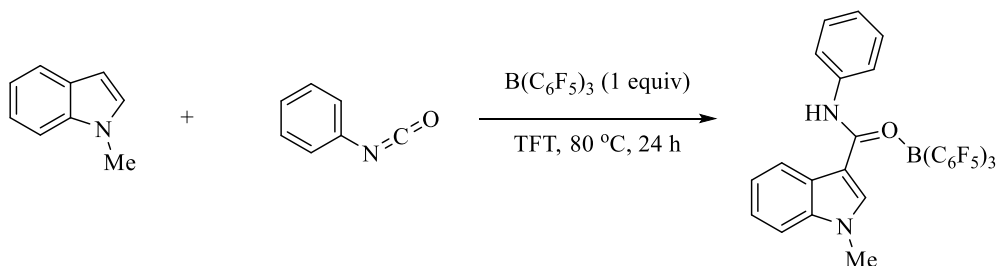

Synthesised in accordance with *General Procedure a* using  $B(C_6F_5)_3$  (1 equiv, 51 mg, 0.1 mmol), phenyl isocyanate (2 equiv, 22  $\mu$ L, 0.2 mmol), and *N*-methylindole (1 equiv, 13  $\mu$ L, 0.1 mmol) in TFT to afford **1b**· $B(C_6F_5)_3$ . The reaction mixture was kept inside the glovebox for crystallisation. After several days, light pink crystals formed. The crystals were collected and washed with pentane. Yield: 18 mg, 0.02 mmol, 24%.

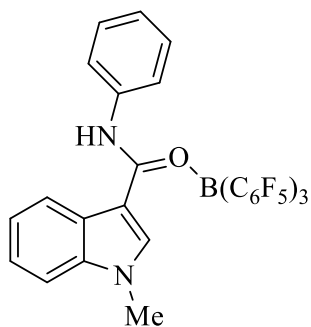

$^1H$  NMR (500 MHz,  $CDCl_3$ , 298 K)  $\delta$ : 7.86 (br., s, 1H, NH), 7.68 (d,  $J = 7.9$  Hz, 1H, Ar-CH), 7.64 (s, 1H, CH), 7.47–7.31 (m, 8H, Ar-CH), 3.82 (s, 3H, NMe);  $^{13}C$  NMR (126 MHz,  $CDCl_3$ , 298 K)  $\delta$ : 166.2, 137.5, 135.9, 134.8, 129.5, 126.7, 124.4, 124.1, 123.2, 122.1, 118.7, 111.2, 107.4, 33.7 (NMe);\*  $^{11}B$  NMR (128 MHz,  $CDCl_3$ , 298 K)  $\delta$ : -2.01;  $^{19}F$  NMR (471 MHz,  $CDCl_3$ , 298 K)  $\delta$ : -135.05 (br., 2F), -157.45 (br., 1F), -163.96 (br., 2F).

\*The  $C_6F_5$  carbon atoms could not be detected in  $^{13}C$  NMR in sufficient intensity to assign them.

### Synthesis of **2** and **3**

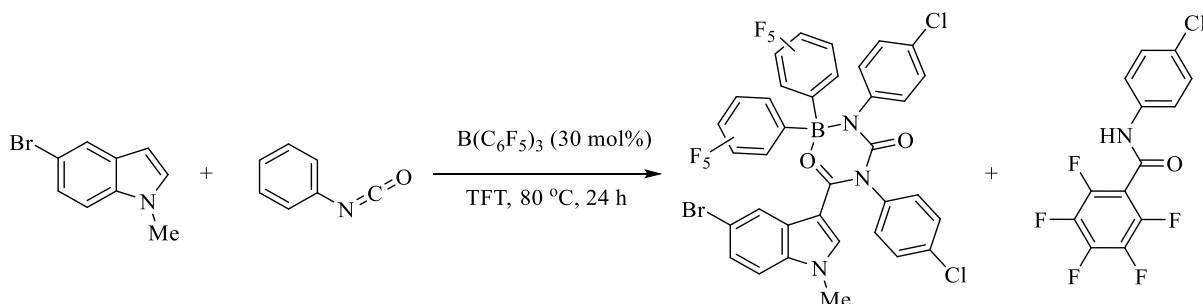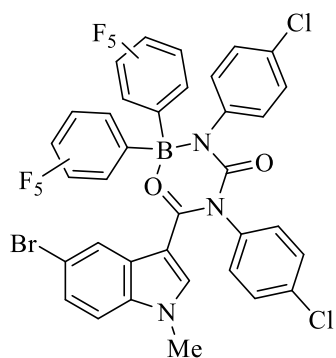

Complex **2** was synthesized by *General Procedure a* using  $B(C_6F_5)_3$  (0.3 equiv, 15 mg, 0.03 mmol), 4-chlorophenyl isocyanate (1.5 equiv, 23 mg, 0.15 mmol), and 5-bromo-1-methylindole (1 equiv, 21 mg, 0.1 mmol) in TFT to afford **2** and **3**. The crude reaction mixture was purified via preparative thin layer chromatography using hexane/ethyl acetate as eluent. Compound **2** was obtained as a light pink solid. Yield: 10 mg, 0.01 mmol, 39%.\*\*

$^1H$  NMR (500 MHz,  $CDCl_3$ , 298 K)  $\delta$ : 8.19 (s, 1H, Ar-CH), 7.62 (d,  $J = 8.5$  Hz, 2H, Ar-CH), 7.52–7.39 (m, 3H, Ar-CH), 7.20 (m, 5H, Ar-CH), 5.94 (s, 1H, indole C2), 3.66 (s, 3H, NMe);  $^{13}C$  NMR (126 MHz,  $CDCl_3$ , 298 K)  $\delta$ : 167.5, 152.7, 137.6, 136.6, 135.4, 135.3, 135.1, 132.0, 130.5, 129.9, 129.2, 126.9, 125.5, 121.7, 116.8, 111.3, 108.3, 33.9;\*  $^{11}B$  NMR (128 MHz,

CDCl<sub>3</sub>)  $\delta$ : 3.7; <sup>19</sup>F NMR (376 MHz, CDCl<sub>3</sub>, 298 K)  $\delta$ : -136.72 (td,  $J$  = 22.6, 9.4 Hz, 2F), -155.10 (t,  $J$  = 20.2 Hz, 1F), -162.85 (td,  $J$  = 23.9, 9.9 Hz, 2F). HRMS (ES+) [M+H]<sup>+</sup> [C<sub>35</sub>H<sub>16</sub>BBrCl<sub>2</sub>F<sub>10</sub>N<sub>3</sub>O<sub>2</sub>]<sup>+</sup>: calculated 861.9716, found 861.9739.

Compound **3** was obtained as a pinkish-white solid. Yield: 4 mg, 0.0124 mmol, 41%.<sup>\*\*</sup>

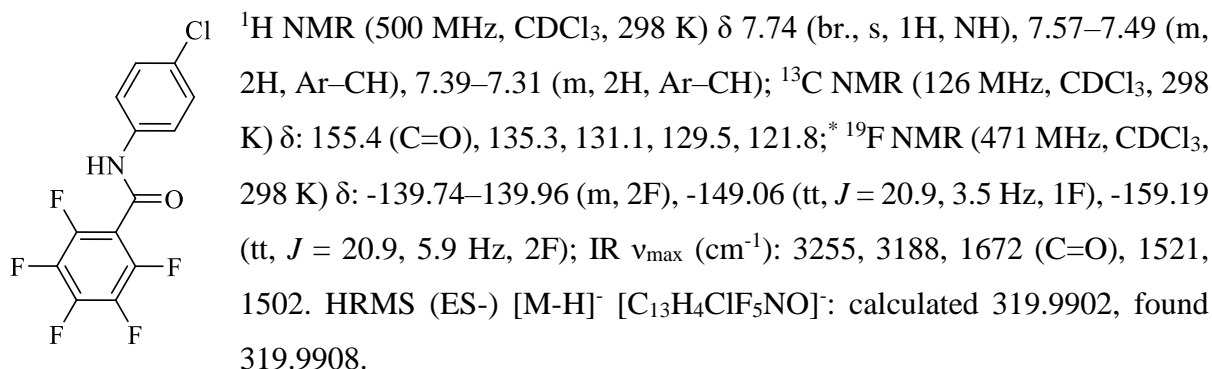

\*The C<sub>6</sub>F<sub>5</sub> carbons could not be detected in <sup>13</sup>C NMR in sufficient intensity to assign them.

\*\*Yields are calculated based on the amount of B(C<sub>6</sub>F<sub>5</sub>)<sub>3</sub> used.

Synthesis of *N*-((4-chlorophenyl)carbamoyl)-1-methyl-*N*-phenyl-1*H*-indole-3-carboxamide, (**4**).

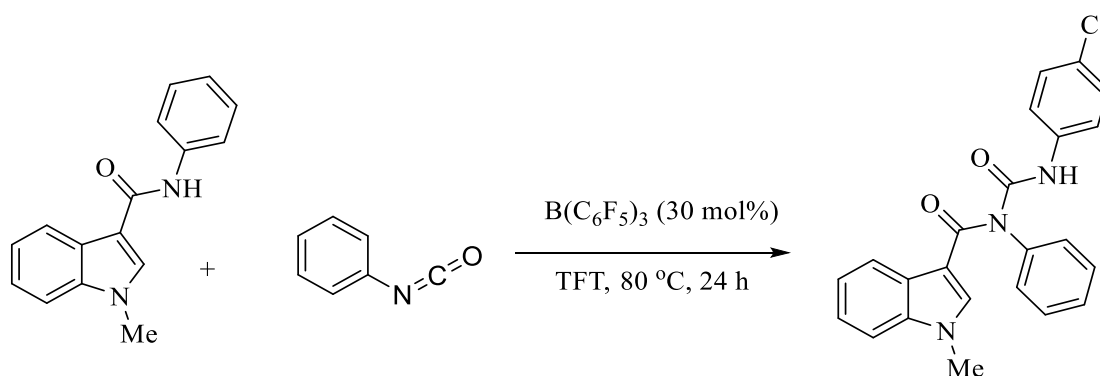

Synthesised in accordance with *General Procedure a* using B(C<sub>6</sub>F<sub>5</sub>)<sub>3</sub> (0.3 equiv, 15 mg, 0.03 mmol), 4-chlorophenyl isocyanate (0.15 equiv, 23 mg, 0.15 mmol), and **1b** (1 equiv, 25 mg, 0.1 mmol) in TFT to afford **4**. The crude reaction mixture was purified *via* preparative thin layer chromatography using hexane/ethyl acetate as eluent. Compound **4** was obtained as a white solid. Yield: 10 mg, 0.02 mmol, 21%.

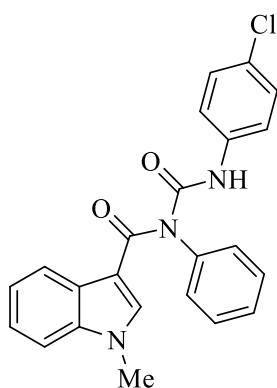

$^1\text{H}$  NMR (600 MHz,  $\text{CDCl}_3$ , 298 K)  $\delta$ : 12.16 (br., s, 1H, NH), 8.49–8.46 (m, 1H, Ar–CH), 7.63–7.59 (m, 2H, Ar–CH), 7.54–7.49 (m, 3H Ar–CH), 7.43–7.39 (m, 2H, Ar–CH), 7.36–7.27 (m, 5H, Ar–CH), 5.49 (s, 1H, CH), 3.49 (s, 3H, NMe);  $^{13}\text{C}$  NMR (151 MHz,  $\text{CDCl}_3$ , 298 K)  $\delta$ : 168.4, 153.2, 139.4, 137.0, 136.3, 135.0, 130.8, 129.6, 129.5, 129.2, 129.1, 128.9, 123.6, 122.84, 122.80, 121.6, 109.7, 108.8, 33.5; IR  $\nu_{\text{max}}$  ( $\text{cm}^{-1}$ ): 2924, 2853, 2349, 1709 (C=O), 1581, 1515 (C=O), 1490, 1359, 1234, 1151, 1109, 748. HRMS (ES+)  $[\text{M}+\text{H}]^+$   $[\text{C}_{23}\text{H}_{19}\text{ClN}_3\text{O}_2]^+$ : calculated 404.1166, found 404.1164.

## 2.6 Synthesis and spectral characterisation of *N*-carboxamidated products

### Synthesis of *N*-phenyl-1*H*-indole-1-carboxamide (**5a**)<sup>7</sup>

Synthesised in accordance with *General Procedure b* using  $\text{BCl}_3$  (1 M in hexane, 5  $\mu\text{L}$ , 0.005 mmol), indole (12 mg, 0.10 mmol), and phenylisocyanate (16  $\mu\text{L}$ , 0.15 mmol) in 1,2- $\text{C}_2\text{H}_4\text{Cl}_2$  to afford **5a**. The crude reaction mixture was purified *via* preparative thin layer chromatography using hexane/ethyl acetate as eluent. The desired compound **5a** was obtained as a white solid. Yield: 22 mg, 0.09 mmol, 93%.

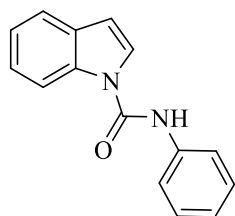

$^1\text{H}$  NMR (500 MHz,  $\text{CDCl}_3$ , 298 K)  $\delta$ : 8.11 (dd,  $J = 8.3, 0.9$  Hz, 1H, Ar–CH), 7.64 (dt,  $J = 7.8, 1.3, 0.8$  Hz, 1H, Ar–CH), 7.56 (d,  $J = 3.7$  Hz, 1H, indole C2), 7.57–7.50 (m, 2H, Ar–CH), 7.43–7.32 (m, 4H, Ar–CH), 7.29–7.25 (m, 1H, Ar–CH), 7.21–7.17 (m, 1H, Ar–CH), 6.69 (dd,  $J = 3.7, 0.8$  Hz, 1H, indole C3);  $^{13}\text{C}$  NMR (126 MHz,  $\text{CDCl}_3$ , 298 K)  $\delta$ : 149.6, 137.2, 135.2, 130.6, 129.5, 125.0, 124.7, 124.2, 122.8, 121.6, 120.5, 114.1, 107.9. Data agrees with literature values.<sup>7</sup>

### Synthesis of *N*-(*p*-tolyl)-1*H*-indole-1-carboxamide (**5b**)<sup>8</sup>

Synthesised in accordance with *General Procedure b* using  $\text{BCl}_3$  (1 M in hexane, 5  $\mu\text{L}$ , 0.005 mmol), indole (12 mg, 0.10 mmol), and *p*-tolyl isocyanate (19  $\mu\text{L}$ , 0.15 mmol) in 1,2- $\text{C}_2\text{H}_4\text{Cl}_2$  to afford **5b**. The crude reaction mixture was purified *via* preparative thin layer chromatography using hexane/ethyl acetate as eluent. The desired compound **5b** was obtained as a brown solid. Yield: 25 mg, 0.07 mmol, 72%.

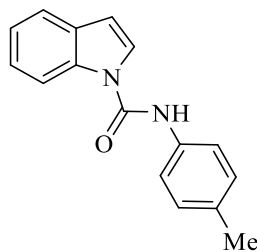

$^1\text{H}$  NMR (500 MHz,  $\text{CDCl}_3$ , 298 K)  $\delta$ : 8.02 (d,  $J = 9.2$  Hz, 1H, Ar–CH), 7.53 (dd,  $J = 7.8, 1.0$  Hz, 1H, Ar–CH), 7.44 (d,  $J = 3.6$  Hz, 1H, indole C2), 7.33 (br, s, 1H, NH), 7.30 (d,  $J = 8.4$  Hz, 2H, Ar–CH), 7.24 (t,  $J = 8.4$  Hz, 1H, Ar–CH), 7.19–7.14 (m, 1H, Ar–CH), 7.07 (d,  $J = 8.1$  Hz,

2H, Ar-CH), 6.55 (d,  $J = 3.6$  Hz, 1H, indole C3), 2.25 (s, 3H, CH<sub>3</sub>); <sup>13</sup>C NMR (126 MHz, CDCl<sub>3</sub>, 298 K)  $\delta$ : 149.9, 135.2, 134.7, 134.5, 130.4, 129.8, 124.5, 124.3, 122.7, 121.5, 120.8, 114.2, 107.7, 21.0. Data agrees with literature values.<sup>8</sup>

#### Synthesis of *N*-(4-chlorophenyl)-1*H*-indole-1-carboxamide (**5c**)<sup>8</sup>

Synthesised in accordance with *General Procedure a* using BCl<sub>3</sub> (1 M in hexane, 5  $\mu$ L, 0.005 mmol), indole (12 mg, 0.10 mmol), and 4-chlorophenyl isocyanate (23 mg, 0.15 mmol) in 1,2-C<sub>2</sub>H<sub>4</sub>Cl<sub>2</sub> to afford **5c**. The crude reaction mixture was purified *via* preparative thin layer chromatography using hexane/ethyl acetate as eluent. The desired compound **5c** was obtained as an off-white solid. Yield: 25 mg, 0.09 mmol, 93%.

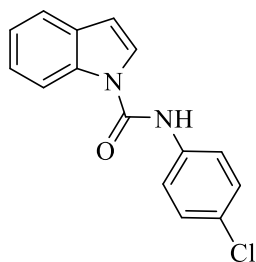

<sup>1</sup>H NMR (500 MHz, CDCl<sub>3</sub>, 298 K)  $\delta$ : 7.99 (d,  $J = 9.3$  Hz, 1H, Ar-CH), 7.52 (d,  $J = 8.8$  Hz, 1H, indole C3), 7.40 (d,  $J = 3.7$  Hz, 1H, Ar-CH), 7.39 (br., s, 1H, NH), 7.37–7.33 (m, 2H, Ar-CH), 7.27–7.19 (m, 3H, Ar-CH), 7.18–7.13 (m, 1H, Ar-CH), 6.55 (d,  $J = 3.7$  Hz, 1H, indole C2); <sup>13</sup>C NMR (126 MHz, CDCl<sub>3</sub>, 298 K)  $\delta$ : 149.7, 135.7, 135.2, 130.5, 130.1, 129.4, 124.7, 124.0, 123.0, 121.9, 121.6, 114.2, 108.2. Data agrees with literature values.<sup>8</sup>

#### Synthesis of *N*-(4-methoxyphenyl)-1*H*-indole-1-carboxamide (**5d**)<sup>9</sup>

Synthesised in accordance with *General Procedure b* using BCl<sub>3</sub> (1 M in hexane, 5  $\mu$ L, 0.005 mmol), indole (12 mg, 0.10 mmol), and 4-methoxy phenyl isocyanate (19  $\mu$ L, 0.15 mmol) in 1,2-C<sub>2</sub>H<sub>4</sub>Cl<sub>2</sub> to afford **5d**. The crude reaction mixture was purified *via* preparative thin layer chromatography using hexane/ethyl acetate as eluent. The desired compound **5d** was obtained as an off-white solid. Yield: 25 mg, 0.09 mmol, 94%.

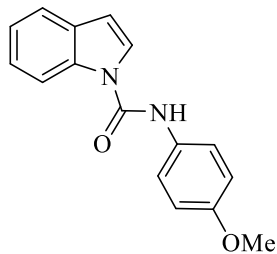

<sup>1</sup>H NMR (500 MHz, CDCl<sub>3</sub>, 298 K)  $\delta$ : 8.01 (d,  $J = 8.1$  Hz, 1H, Ar-CH), 7.51 (d,  $J = 7.8$  Hz, 1H, Ar-CH), 7.42 (d,  $J = 3.7$  Hz, 1H, indole C2), 7.33 (br., s, 1H, NH), 7.27 (d,  $J = 9.0$  Hz, 2H, Ar-CH), 7.22 (t,  $J = 8.4$  Hz, 1H, Ar-CH), 7.16–7.12 (m, 1H, Ar-CH), 6.76 (d,  $J = 9.0$  Hz, 2H, Ar-CH), 6.52 (d,  $J = 3.7$  Hz, 1H, indole C3), 3.68 (s, 3H, OMe); <sup>13</sup>C NMR (126 MHz, CDCl<sub>3</sub>, 298 K)  $\delta$ : 157.1, 150.2, 135.3, 130.4, 129.9, 124.5, 124.2, 122.9, 122.7, 121.5, 114.5, 114.2, 107.7, 55.7. Data agrees with literature values.<sup>9</sup>

### Synthesis of 3-methyl-N-phenyl-1H-indole-1-carboxamide (**5e**)

Synthesised in accordance with *General Procedure b* using BCl<sub>3</sub> (1 M in hexane, 5 μL, 0.005 mmol), 3-methylindole (13 mg, 0.10 mmol), and methoxyphenylisocyanate (16 μL, 0.15 mmol) in 1,2-C<sub>2</sub>H<sub>4</sub>Cl<sub>2</sub> to afford **5e**. The crude reaction mixture was purified *via* preparative thin layer chromatography using hexane/ethyl acetate as eluent. The desired compound **5e** was obtained as an off-white solid. Yield: 21 mg, 0.08 mmol, 84%.

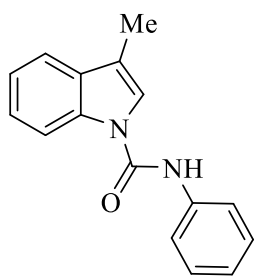

<sup>1</sup>H NMR (500 MHz, CDCl<sub>3</sub>, 298 K) δ: 8.04 (dt, *J* = 8.3, 0.9 Hz, 1H, Ar-CH), 7.48–7.44 (m, 1H, Ar-CH), 7.43 (dd, *J* = 8.6, 1.1 Hz, 2H, Ar-CH), 7.31–7.28 (m, 1H, Ar-CH), 7.29–7.23 (m, 3H, Ar-CH), 7.20 (s, 1H, indole C2), 7.18–7.17 (m, 1H, Ar-CH), 7.09–7.04 (m, 1H, Ar-CH), 2.20 (d, *J* = 1.3 Hz, 3H, CH<sub>3</sub>); <sup>13</sup>C NMR (126 MHz, CDCl<sub>3</sub>, 298 K) δ: 149.8, 137.3, 135.7, 131.2, 129.3, 124.72, 124.67, 122.4, 121.0, 120.5, 119.5, 117.3, 114.4, 9.8; IR *v*<sub>max</sub> (cm<sup>-1</sup>): 3246, 3107, 3048, 2965, 2916, 2857, 1670 (C=O), 1597, 1528, 1447, 1343, 1215, 1088. HRMS (EI) [M] [C<sub>16</sub>H<sub>14</sub>ON<sub>2</sub>]: calculated. 250.1101, found: 250.1102.

### Synthesis of 5-chloro-N-phenyl-1H-indole-1-carboxamide (**5f**)

Synthesised in accordance with *General Procedure b* using BCl<sub>3</sub> (1 M in hexane, 5 μL, 0.005 mmol), 5-chloro-indole (15 mg, 0.10 mmol), phenyl isocyanate (16 μL, 0.15 mmol) in 1,2-C<sub>2</sub>H<sub>4</sub>Cl<sub>2</sub> to afford **5f**. The crude reaction mixture was purified *via* preparative thin layer chromatography using hexane/ethyl acetate as eluent. The desired compound **5f** was obtained as a green solid. Yield: 23 mg, 0.09 mmol, 85%.

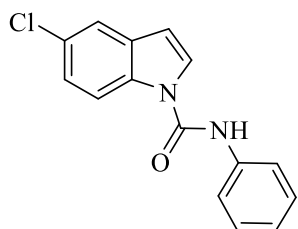

<sup>1</sup>H NMR (500 MHz, CDCl<sub>3</sub>, 298 K) δ: 8.09 (d, *J* = 8.8 Hz, 1H, Ar-CH), 7.58 (d, *J* = 2.7 Hz, 1H, Ar-CH), 7.53 (d, *J* = 3.7 Hz, 1H, Indole C2), 7.52–7.49 (m, 2H, Ar-CH), 7.41–7.36 (m, 2H, Ar-CH), 7.34 (br., s, 1H, NH), 7.29 (dd, *J* = 8.8, 2.1 Hz, 1H, Ar-CH), 7.21–7.17 (m, 1H, Ar-CH), 6.61 (dd, *J* = 3.7, 0.8 Hz, 1H, Indole C3); <sup>13</sup>C NMR (126 MHz, CDCl<sub>3</sub>, 298 K) δ: 149.4, 136.9, 133.9, 131.4, 129.5, 128.5, 125.2, 125.0, 124.9, 121.0, 120.7, 115.6, 107.4; IR *v*<sub>max</sub> (cm<sup>-1</sup>): 3294, 3138, 3063, 1678 (C=O), 1599, 1574, 1526, 1445, 1364, 1333, 1266, 1248, 1200, 1092, 1067, 1032. HRMS (EI) [M] [C<sub>15</sub>H<sub>11</sub>ON<sub>2</sub><sup>35</sup>Cl]: calculated. 270.0554, found: 270.0552.



### Synthesis of 5-chloro-N-(4-chlorophenyl)-1H-indole-1-carboxamide (**5g**)

Synthesised in accordance with *General Procedure b* using BCl<sub>3</sub> (1 M in hexane, 5 μL, 0.005 mmol), 5-chloro-indole (15 mg, 0.10 mmol), and 4-chlorophenylisocyanate (23 mg, 0.15 mmol) in 1,2-C<sub>2</sub>H<sub>4</sub>Cl<sub>2</sub> to afford **5g**. The crude reaction mixture was purified *via* preparative thin layer chromatography using hexane/ethyl acetate as eluent. The desired compound **5g** was obtained as an off-white solid. Yield: 30 mg, 0.10 mmol, 98%.

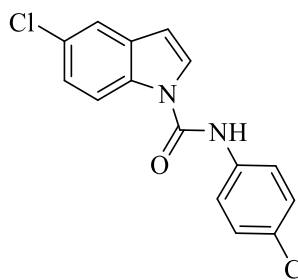

<sup>1</sup>H NMR (500 MHz, CDCl<sub>3</sub>, 298 K) δ: 8.06 (d, *J* = 8.9 Hz, 1H, Ar-CH), 7.57 (d, *J* = 2.1 Hz, 1H, Ar-CH), 7.49 (d, *J* = 3.7 Hz, 1H, Indole C2), 7.46–7.42 (m, 2H, Ar-CH), 7.36 (br., s, 1H, NH), 7.35–7.31 (m, 2H, Ar-CH), 7.29 (dd, *J* = 8.9, 2.1 Hz, 1H, Ar-CH), 6.60 (d, *J* = 3.8 Hz, 1H, Indole C3); <sup>13</sup>C NMR (126 MHz, CDCl<sub>3</sub>, 298 K) δ: 149.3, 135.5, 133.9, 131.4, 130.4, 129.4, 128.6, 125.0, 124.8, 122.0, 121.0, 115.6, 107.7; IR ν<sub>max</sub> (cm<sup>-1</sup>): 330, 1676 (C=O), 1593, 1518, 1493, 1449, 1400, 1329, 1285, 1244, 1200, 1090, 1067, 1015. HRMS (EI) [M] [C<sub>15</sub>H<sub>10</sub>ON<sub>2</sub><sup>35</sup>Cl<sub>2</sub>]: calculated. 304.0165, found: 304.0169.

### Synthesis of 5-chloro-N-(4-methoxyphenyl)-1H-indole-1-carboxamide (**5h**)

Synthesised in accordance with *General Procedure b* using BCl<sub>3</sub> (1 M in hexane, 5 μL, 0.005 mmol), 5-chloro-indole (15 mg, 0.10 mmol), and 4-methoxyphenyl isocyanate (19 μL, 0.15 mmol) in 1,2-C<sub>2</sub>H<sub>4</sub>Cl<sub>2</sub> to afford **5h**. The crude reaction mixture was purified *via* preparative thin layer chromatography using hexane/ethyl acetate as eluent. The desired compound **5h** was obtained as a off-white solid. Yield: 16 mg, 0.05 mmol, 53%.

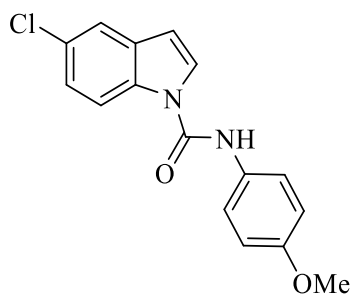

<sup>1</sup>H NMR (500 MHz, CDCl<sub>3</sub>, 298 K) δ: 8.10 (d, *J* = 8.9 Hz, 1H, Ar-CH), 7.58 (d, *J* = 2.1 Hz, 1H, Ar-CH), 7.52 (d, *J* = 3.7 Hz, 1H, Indole C2), 7.43–7.36 (m, 2H, Ar-CH), 7.29 (dd, *J* = 8.9, 2.1 Hz, 1H, Ar-CH), 7.25 (br., s, 1H, NH), 6.96–6.87 (m, 2H, Ar-CH), 6.61 (dd, *J* = 3.7, 0.8 Hz, 1H, Indole C3), 3.81 (s, 3H, OMe); <sup>13</sup>C NMR (126 MHz, CDCl<sub>3</sub>, 298 K) δ: 157.2, 149.8, 133.9, 131.3, 129.6, 128.3, 124.9, 124.8, 123.0, 120.9, 115.6, 114.6, 107.3, 55.7; IR ν<sub>max</sub> (cm<sup>-1</sup>): 3320, 2924, 2853, 1937, 1881, 1709, 1678 (C=O), 1601, 1572, 1514, 1474, 1441, 1414, 1360, 1333, 1302, 1265, 1244, 1198, 1173, 1109, 1090, 1063, 1032. HRMS (ES<sup>+</sup>) [M+H] [C<sub>16</sub>H<sub>14</sub>O<sub>2</sub>N<sub>2</sub><sup>35</sup>Cl]<sup>+</sup>: calculated. 301.0744, found: 301.0735.

### Synthesis of 5-methoxy-N-phenyl-1H-indole-1-carboxamide (**5i**)

Synthesised in accordance with *General Procedure b* using BCl<sub>3</sub> (1 M in hexane, 5 μL, 0.005 mmol), 5-methoxy indole (15 mg, 0.10 mmol), and phenyl isocyanate (16 μL, 0.15 mmol) in 1,2-C<sub>2</sub>H<sub>4</sub>Cl<sub>2</sub> to afford **5i**. The crude reaction mixture was purified *via* preparative thin layer chromatography using hexane/ethyl acetate as eluent. The desired compound **5i** was obtained as an off-white solid. Yield: 19 mg, 0.07 mmol, 71%.

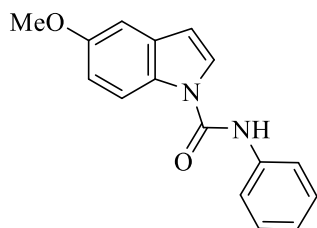

<sup>1</sup>H NMR (500 MHz, CDCl<sub>3</sub>, 298 K) δ: 8.01 (d, *J* = 9.8 Hz, 1H, Ar-CH), 7.53–7.48 (m, 3H, Ar-CH and Indole C2), 7.43 (br., s, 1H, NH), 7.37 (t, *J* = 8.1 Hz, 2H, Ar-CH), 7.20–7.14 (m, 1H, Ar-CH), 7.07 (d, *J* = 2.4 Hz, 1H, Ar-CH), 6.96 (dd, *J* = 9.0, 2.5 Hz, 1H, Ar-CH), 6.58 (d, *J* = 3.5 Hz, 1H, Indole C3), 3.86 (s, 3H, OMe); <sup>13</sup>C NMR (126 MHz, CDCl<sub>3</sub>, 298 K) δ 155.9, 149.7, 137.2, 131.3, 130.2, 129.4, 124.9, 124.6, 120.6, 115.1, 113.6, 107.7, 103.8, 55.8; IR *v*<sub>max</sub> (cm<sup>-1</sup>): 3245, 3066, 1671 (C=O), 1594, 1542, 1471, 1438, 1308, 1263, 1202, 1148, 1115, 1021. HRMS (EI) [M] [C<sub>16</sub>H<sub>14</sub>O<sub>2</sub>N<sub>2</sub>]: calculated. 266.1050, found: 266.1049.

### Synthesis of N-(4-chlorophenyl)-5-methoxy-1H-indole-1-carboxamide (**5j**)

Synthesised in accordance with *General Procedure b* using BCl<sub>3</sub> (1 M in hexane, 5 μL, 0.005 mmol), 5-methoxy indole (15 mg, 0.10 mmol), and 4-chlorophenyl isocyanate (23 mg, 0.15 mmol) in 1,2-C<sub>2</sub>H<sub>4</sub>Cl<sub>2</sub> to afford **5j**. The crude reaction mixture was purified *via* preparative thin layer chromatography using hexane/ethyl acetate as eluent. The desired compound **5j** was obtained as an off-white solid. Yield: 10 mg, 0.03 mmol, 33%.

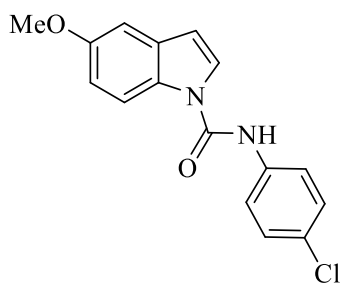

<sup>1</sup>H NMR (500 MHz, CDCl<sub>3</sub>, 298 K) δ: 8.00 (d, *J* = 9.0 Hz, 1H, Ar-CH), 7.50 (d, *J* = 3.7 Hz, 1H, Indole C2), 7.49–7.45 (m, 2H, Ar-CH), 7.37–7.33 (m, 2H, Ar-CH), 7.30 (br., s, 1H, NH), 7.08 (d, *J* = 2.5 Hz, 1H, Ar-CH), 6.98 (dd, *J* = 9.0, 2.6 Hz, 1H, Ar-CH), 6.62 (dd, *J* = 3.6, 0.8 Hz, 1H, Ar-CH), 3.87 (s, 3H, OMe); <sup>13</sup>C NMR (126 MHz, CDCl<sub>3</sub>, 298 K) δ 156.1, 149.5, 135.8, 131.3, 130.1, 130.0, 129.4, 124.4, 121.7, 115.0, 113.8, 108.1, 103.9, 55.9; IR *v*<sub>max</sub> (cm<sup>-1</sup>): 2833, 2351, 1715, 1668 (C=O), 1645, 1634, 1622, 1614, 1595, 1568, 1506, 1495, 1472, 1457, 1445, 1402, 1368, 1337, 1310, 1290, 1263, 1209, 1182, 1152, 1121, 1106, 1094, 1020, 1013. HRMS (EI) [M] [C<sub>16</sub>H<sub>13</sub>O<sub>2</sub>N<sub>2</sub><sup>35</sup>Cl]: calculated. 300.0660, found: 300.0663.

### Synthesis of 5-methoxy-N-(4-methoxyphenyl)-1H-indole-1-carboxamide (**5k**)

Synthesised in accordance with *General Procedure b* using BCl<sub>3</sub> (1 M in hexane, 5 μL, 0.005 mmol), 5-methoxy-indole (15 mg, 0.10 mmol), and 4-methoxy-phenylisocyanate (19 μL, 0.15 mmol) in 1,2-C<sub>2</sub>H<sub>4</sub>Cl<sub>2</sub> to afford **5k**. The crude reaction mixture was purified *via* preparative thin layer chromatography using hexane/ethyl acetate as eluent. The desired compound **5k** was obtained as an off-white solid. Yield: 17 mg, 0.06 mmol, 57%.

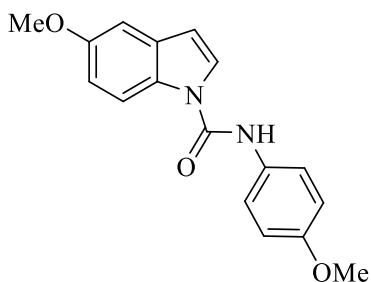

<sup>1</sup>H NMR (500 MHz, CDCl<sub>3</sub>, 298 K) δ: 8.02 (d, *J* = 9.0 Hz, 1H, Ar-CH), 7.51 (d, *J* = 3.6 Hz, 1H, Indole C2), 7.43–7.37 (m, 2H, Ar-CH), 7.22 (br., s, 1H, NH), 7.08 (d, *J* = 2.6 Hz, 1H, Ar-CH), 6.97 (dd, *J* = 9.0, 3.0 Hz, 1H, Ar-CH), 6.94–6.87 (m, 2H, Ar-CH), 6.60 (dd, *J* = 3.6, 0.8 Hz, 1H, Indole C3), 3.86 (s, 3H, OMe), 3.81 (s, 3H, OMe); <sup>13</sup>C NMR (126 MHz, CDCl<sub>3</sub>, 298 K) δ: 157.1, 155.9, 150.1, 131.3, 130.2, 130.0, 124.6, 122.9, 115.1, 114.6, 113.7, 107.6, 103.7, 55.8, 55.7; IR  $\nu_{\max}$  (cm<sup>-1</sup>): 3310, 3138, 2999, 2936, 2833, 1672 (C=O), 1613, 1601, 1512, 1474, 1414, 1368, 1335, 1298, 1254, 1211, 1198, 1150, 1121, 1032. HRMS (EI) [M] [C<sub>17</sub>H<sub>16</sub>O<sub>3</sub>N<sub>2</sub>]: calculated. 296.1055, found: 296.1056.

### Synthesis of N-phenyl-9H-carbazole-9-carboxamide (**5l**)

Synthesised in accordance with *General Procedure b* using BCl<sub>3</sub> (1 M in hexane, 5 μL, 0.005 mmol), carbazole (16 mg, 0.10 mmol), and phenylisocyanate (16 μL, 0.15 mmol) in 1,2-C<sub>2</sub>H<sub>4</sub>Cl<sub>2</sub> to afford **5l**. The crude reaction mixture was purified *via* preparative thin layer chromatography using hexane/ethyl acetate as eluent. The desired compound **5l** was obtained as a white solid. Yield: 24 mg, 0.08 mmol, 84%.

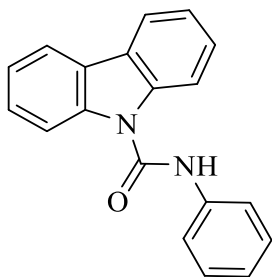

<sup>1</sup>H NMR (500 MHz, CDCl<sub>3</sub>, 298 K) δ: 8.04 (d, *J* = 10.8 Hz, 4H, Ar-CH), 7.62–7.58 (m, 2H, Ar-CH), 7.53 (br., s, 1H, NH), 7.52–7.47 (m, 2H, Ar-CH), 7.47–7.41 (m, 2H, Ar-CH), 7.40–7.34 (m, 2H, Ar-CH), 7.23–7.19 (m, 1H, Ar-CH); <sup>13</sup>C NMR (126 MHz, CDCl<sub>3</sub>, 298 K) δ: 150.2, 138.3, 137.3, 129.5, 127.3, 125.4, 124.9, 122.8, 120.5, 120.1, 113.6; IR  $\nu_{\max}$  (cm<sup>-1</sup>): 3260, 1668 (C=O), 1599, 1526, 1445, 1352, 1327, 1310, 1256, 1236, 1219, 1200, 1120, 1078, 1028. HRMS (ES<sup>+</sup>) [M+H] [C<sub>19</sub>H<sub>15</sub>ON<sub>2</sub>]<sup>+</sup>: calculated. 287.1184, found: 287.1186.

### Synthesis of *N*-phenyl-1*H*-benzo[*d*]imidazole-1-carboxamide (**5m**)

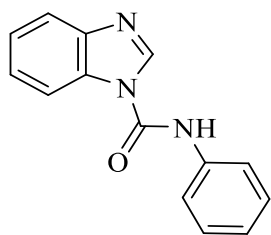

Synthesised in accordance with *General Procedure b* using  $\text{BCl}_3$  (1 M in hexane, 5  $\mu\text{L}$ , 0.005 mmol), benzoimidazole (12 mg, 0.10 mmol), and phenyl isocyanate (16  $\mu\text{L}$ , 0.15 mmol) in 1,2- $\text{C}_2\text{H}_4\text{Cl}_2$  to afford **5m**. The crude reaction mixture was purified *via* preparative thin layer chromatography using hexane/ethyl acetate as eluent. The desired compound **5m** was obtained as a white solid. Yield: 23 mg, 0.10 mmol, 97%.

$^1\text{H}$  NMR (500 MHz,  $\text{CDCl}_3$ , 298 K)  $\delta$ : 9.11 (br., s, 1H, NH), 8.48 (dd,  $J = 8.5, 0.9$  Hz, 1H, Ar-CH), 8.12 (s, 1H, C2), 7.76 (dt,  $J = 8.0, 1.0$  Hz, 1H, Ar-CH), 7.71–7.64 (m, 2H, Ar-CH), 7.62–7.53 (m, 1H, Ar-CH), 7.44–7.36 (m, 2H, Ar-CH), 7.37–7.30 (m, 1H, Ar-CH), 7.17 (tt,  $J = 7.4, 1.1$  Hz, 1H, Ar-CH);  $^{13}\text{C}$  NMR (126 MHz,  $\text{CDCl}_3$ , 298 K)  $\delta$ : 148.9, 139.3, 137.9, 137.3, 129.4, 129.3, 126.0, 124.5, 123.7, 121.2, 119.8, 115.0; IR  $\nu_{\text{max}}$  ( $\text{cm}^{-1}$ ): 3358, 1722 (C=O), 1591, 1522, 1497, 1466, 1441, 1427, 1416, 1368, 1352, 1325, 1310, 1297, 1269, 1229, 1217, 1175, 1156, 1142, 1113, 1080, 1034, 1020, 1009. HRMS (EI) [M] [ $\text{C}_{14}\text{H}_{11}\text{ON}_3$ ]: calculated. 237.0897, found: 237.0895.

### Synthesis of 2-oxo-*N*-phenylindoline-1-carboxamide (**5n**)<sup>10</sup>

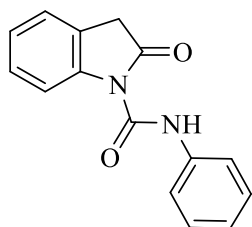

Synthesised in accordance with *General Procedure b* using  $\text{BCl}_3$  (1 M in hexane, 5  $\mu\text{L}$ , 0.005 mmol), oxindole (13 mg, 0.10 mmol), and phenyl isocyanate (16  $\mu\text{L}$ , 0.15 mmol) in 1,2- $\text{C}_2\text{H}_4\text{Cl}_2$  to afford **5n**. The crude reaction mixture was purified *via* preparative thin layer chromatography using hexane/ethyl acetate as eluent. The desired compound **5n** was obtained as an off-white solid. Yield: 12 mg, 0.05 mmol, 48%.

$^1\text{H}$  NMR (500 MHz,  $\text{CDCl}_3$ , 298 K)  $\delta$ : 10.69 (br., s, 1H, NH), 8.32 (d,  $J = 8.2$  Hz, 1H, Ar-CH), 7.64–7.53 (m, 2H, Ar-CH), 7.40–7.33 (m, 3H, Ar-CH), 7.29 (d,  $J = 8.9$  Hz, 1H, Ar-CH), 7.19 (t,  $J = 8.0$  Hz, 1H, Ar-CH), 7.15 (tt,  $J = 7.4, 1.2$  Hz, 1H, Ar-CH), 3.81 (s, 2H,  $\text{CH}_2$ );  $^{13}\text{C}$  NMR (126 MHz,  $\text{CDCl}_3$ , 298 K)  $\delta$ : 177.8, 149.6, 141.7, 137.2, 129.2, 128.6, 124.9, 124.7, 124.1, 123.0, 120.7, 116.9, 37.2. Data agrees with literature values.<sup>10</sup>

### Synthesis of 3-phenyl-1,1-dipropylurea (**5o**)<sup>10</sup>

Synthesised in accordance with *General Procedure b* using BCl<sub>3</sub> (1 M in hexane, 5 μL, 0.005 mmol), dipropylamine (14 μL, 0.10 mmol), and phenyl isocyanate (16 μL, 0.15 mmol) in 1,2-C<sub>2</sub>H<sub>4</sub>Cl<sub>2</sub> to afford **5o**. The crude reaction mixture was purified *via* silica-plug using hexane/ethyl acetate as eluent. The desired compound **2o** was obtained as a white solid. Yield: 21 mg, 0.10 mmol, 96%.

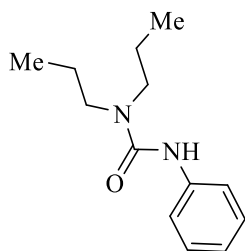

<sup>1</sup>H NMR (500 MHz, CDCl<sub>3</sub>, 298 K) δ: 7.33–7.28 (m, 2H, Ar–CH), 7.23–7.17 (m, 2H, Ar–CH), 6.94 (tt, *J* = 7.4, 1.2 Hz, 1H, Ar–CH), 6.25 (br., s, 1H, NH), 3.19 (t, *J* = 7.8 Hz, 4H, α-CH<sub>2</sub>), 1.57 (m, *J* = 7.4 Hz, 4H, β-CH<sub>2</sub>), 0.87 (t, *J* = 7.4 Hz, 6H, CH<sub>3</sub>); <sup>13</sup>C NMR (126 MHz, CDCl<sub>3</sub>, 298 K) δ: 155.0, 139.4, 128.9, 122.8, 119.8, 49.5, 22.0, 11.5. Data agrees with literature values.<sup>10</sup>

### Synthesis of 1,1-diethyl-3-phenylurea (**5p**)<sup>11</sup>

Synthesised in accordance with *General Procedure b* using BCl<sub>3</sub> (1 M in hexane, 5 μL, 0.005 mmol), diethylamine (14 μL, 0.10 mmol), and phenyl isocyanate (16 μL, 0.15 mmol) in 1,2-C<sub>2</sub>H<sub>4</sub>Cl<sub>2</sub> to afford **5p**. The crude reaction mixture was purified *via* silica-plug using hexane/ethyl acetate as eluent. The desired compound **5p** was obtained as a white solid. Yield: 19 mg, 0.10 mmol, 99%.

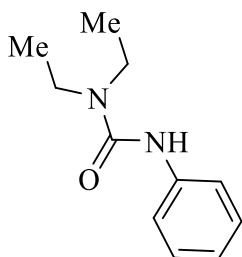

<sup>1</sup>H NMR (500 MHz, CDCl<sub>3</sub>, 298 K) δ: 7.35–7.29 (m, 2H, Ar–CH), 7.24–7.17 (m, 2H, Ar–CH), 6.94 (tt, *J* = 7.3, 1.2 Hz, 1H, Ar–CH), 6.25 (br., s, 1H, NH), 3.30 (q, *J* = 7.1 Hz, 4H, α-CH<sub>2</sub>), 1.15 (t, *J* = 7.2 Hz, 6H, CH<sub>3</sub>); <sup>13</sup>C NMR (126 MHz, CDCl<sub>3</sub>, 298 K) δ: 154.7, 139.4, 128.9, 122.9, 119.9, 41.7, 14.1. Data agrees with literature values.<sup>11</sup>

### Synthesis of *N*-phenylpiperidine-1-carboxamide (**5q**)<sup>11</sup>

Synthesised in accordance with *General Procedure b* using BCl<sub>3</sub> (1 M in hexane, 5 μL, 0.005 mmol), piperidine (10 μL, 0.10 mmol), and phenyl isocyanate (16 μL, 0.15 mmol) in 1,2-C<sub>2</sub>H<sub>4</sub>Cl<sub>2</sub> to afford **5q**. The crude reaction mixture was purified *via* silica-plug using hexane/ethyl acetate as eluent. The desired compound **5q** was obtained as a white solid. Yield: 16 mg, 0.08 mmol, 78%.

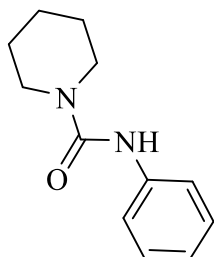

<sup>1</sup>H NMR (500 MHz, CDCl<sub>3</sub>, 298 K) δ: 7.31–7.25 (m, 2H, Ar–CH), 7.23–7.16 (m, 2H, Ar–CH), 6.93 (tt, *J* = 7.3, 1.1 Hz, 1H, Ar–CH), 6.39 (br., s, 1H, NH), 3.37–3.35

(m, 4H, CH<sub>2</sub>), 1.55–1.51 (m, 6H, CH<sub>2</sub>); <sup>13</sup>C NMR (126 MHz, CDCl<sub>3</sub>, 298 K) δ: 155.1, 139.4, 128.9, 122.9, 119.9, 45.3, 25.8, 24.5. Data agrees with literature values.<sup>11</sup>

#### Synthesis of *N*-phenylmorpholine-4-carboxamide (**5r**)<sup>11</sup>

Synthesised in accordance with *General Procedure b* using BCl<sub>3</sub> (1 M in hexane, 5 μL, 0.005 mmol), morpholine (9 μL, 0.10 mmol), and phenyl isocyanate (16 μL, 0.15 mmol) in 1,2-C<sub>2</sub>H<sub>4</sub>Cl<sub>2</sub> to afford **5r**. The crude reaction mixture was purified *via* silica-plug using hexane/ethyl acetate as eluent. The desired compound **5r** was obtained as a white solid. Yield: 16 mg, 0.078 mmol, 78%.

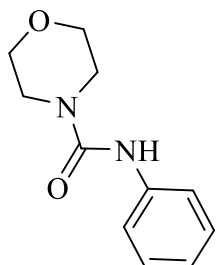

<sup>1</sup>H NMR (500 MHz, CDCl<sub>3</sub>, 298 K) δ: 7.28–7.23 (m, 2H, Ar–CH), 7.23–7.18 (m, 2H, Ar–CH), 6.98 (tt, *J* = 7.3, 1.3 Hz, 1H, Ar–CH), 6.49 (br., s, 1H, NH), 3.63 (t, *J* = 4.6 Hz, 4H, N–CH<sub>2</sub>), 3.38 (t, *J* = 5.2 Hz, 4H, OCH<sub>2</sub>); <sup>13</sup>C NMR (126 MHz, CDCl<sub>3</sub>, 298 K) δ: 155.3, 138.8, 129.0, 123.5, 120.3, 66.6, 44.3. Data agrees with literature values.<sup>11</sup>

#### Synthesis of *N*-phenyl-3,4-dihydroisoquinoline-2(1*H*)-carboxamide (**5s**)<sup>11</sup>

Synthesised in accordance with *General Procedure b* using BCl<sub>3</sub> (1 M in hexane, 5 μL, 0.005 mmol), tetrahydroisoquinoline (13 μL, 0.10 mmol), and phenyl isocyanate (16 μL, 0.15 mmol) in 1,2-C<sub>2</sub>H<sub>4</sub>Cl<sub>2</sub> to afford **5s**. The crude reaction mixture was purified *via* preparative thin layer chromatography using hexane/ethyl acetate as eluent. The desired compound **5s** was obtained as an off-white solid. Yield: 23 mg, 0.09 mmol, 91%.

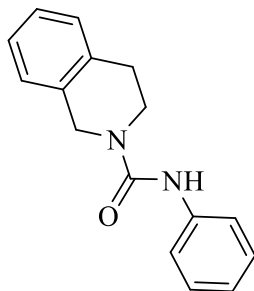

<sup>1</sup>H NMR (500 MHz, CDCl<sub>3</sub>, 298 K) δ: 7.42–7.38 (m, 2H, Ar–CH), 7.31–7.27 (m, 2H, Ar–CH), 7.23–7.16 (m, 3H, Ar–CH), 7.15–7.12 (m, 1H, Ar–CH), 7.04 (tt, *J* = 7.3, 1.2 Hz, 1H, Ar–CH), 6.56 (br., s, 1H, NH), 4.66 (s, 2H, α-N benzylic CH<sub>2</sub>), 3.72 (t, *J* = 5.9 Hz, 2H), 2.92 (t, *J* = 5.9 Hz, 2H); <sup>13</sup>C NMR (126 MHz, CDCl<sub>3</sub>, 298 K) δ: 155.1, 139.1, 135.1, 133.2, 129.0, 128.5, 126.9, 126.6, 126.5, 123.2, 120.2, 45.8, 41.7, 29.1. Data agrees with literature values.<sup>11</sup>

### Synthesis of 3-cyclohexyl-1,1-dipropylurea (**5t**)<sup>12</sup>

Synthesised in accordance with *General Procedure b* using BCl<sub>3</sub> (1 M in hexane, 5 μL, 0.005 mmol), di-propylamine (14 μL, 0.10 mmol), and cyclohexyl isocyanate (19 μL, 0.15 mmol) in 1,2-C<sub>2</sub>H<sub>4</sub>Cl<sub>2</sub> to afford **2t**. The crude reaction mixture was purified *via* silica-plug using hexane/ethyl acetate as eluent. The desired compound **2t** was obtained as a white solid. Yield: 15 mg, 0.07 mmol, 66%.

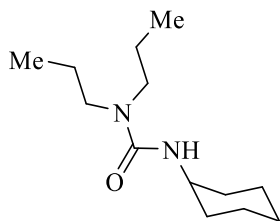

<sup>1</sup>H NMR (500 MHz, CDCl<sub>3</sub>, 298 K) δ: 4.11 (br., s, 1H, NH), 3.63 (m, 1H, CH), 3.11 (t, *J* = 8.2 Hz, 4H, α-N-CH<sub>2</sub>), 1.97–1.89 (m, 2H, CH<sub>2</sub>), 1.69–1.62 (m, 2H, Cy-CH<sub>2</sub>), 1.54 (m, *J* = 7.4 Hz, 4H, β-N-CH<sub>2</sub>), 1.41–1.28 (m, 2H, Cy-CH<sub>2</sub>), 1.24 (s, 1H, Cy-CH<sub>2</sub>), 1.19–1.02 (m, 3H, Cy-CH<sub>2</sub>), 0.88 (t, *J* = 7.4 Hz, 6H, CH<sub>3</sub>); <sup>13</sup>C NMR (126 MHz, CDCl<sub>3</sub>, 298 K) δ: 157.2, 49.3, 49.1, 34.2, 25.9, 25.2, 21.9, 11.5. Data agrees with literature values.<sup>12</sup>

### Synthesis of *N*-(3-(trifluoromethyl)phenyl)-1*H*-indole-1-carboxamide (**5u**)<sup>8</sup>

Synthesised in accordance with *General Procedure b* using BCl<sub>3</sub> (1 M in hexane, 0.85 ml, 0.85 mmol), indole (1 g, 8.5 mmol), and 3-trifluoromethyl-phenyl isocyanate (1.8 mL, 12.8 mmol) in 1,2-C<sub>2</sub>H<sub>4</sub>Cl<sub>2</sub> to afford **5u**. The crude reaction mixture was purified *via* column chromatography using hexane/ethyl acetate as eluent. The desired compound **5u** was obtained as an off-white solid. Yield: 2.0 g, 6.97 mmol, 82%.

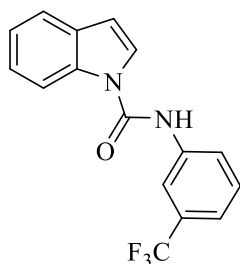

<sup>1</sup>H NMR (500 MHz, CDCl<sub>3</sub>, 298 K) δ: 8.05 (dd, *J* = 8.3, 0.9 Hz, 1H, Ar-CH), 7.77 (br., s, 1H, NH), 7.70–7.64 (m, 1H, Ar-CH), 7.57 (dt, *J* = 7.8, 1.0 Hz, 1H, indole C2), 7.46 (d, *J* = 3.6 Hz, 2H, Ar-CH), 7.43 (t, *J* = 8.0 Hz, 1H, Ar-CH), 7.36 (m, 1H, Ar-CH), 7.30 (m, 1H, Ar-CH), 7.25–7.18 (m, 1H, Ar-CH), 6.63 (dd, *J* = 3.7, 0.8 Hz, 1H, Indole C3); <sup>13</sup>C NMR (126 MHz, CDCl<sub>3</sub>, 298 K) δ: 149.6, 137.8, 135.3, 131.9 (q, *J*<sub>C-F</sub> = 32.7 Hz), 130.5, 130.0, 124.9, 123.9, (q, *J*<sub>C-F</sub> = 272.4 Hz), 123.6, 123.5, 123.1, 122.8, 121.7, 121.54–121.45 (q, *J*<sub>C-F</sub> = 3.8 Hz), 117.2 (q, *J* = 4.0 Hz), 114.2, 108.5. Data agrees with literature values.<sup>8</sup>

## 2.7 Synthesis and spectral characterisation of *N*-carboxamidated 2-alkynyl products

### Synthesis of 1-benzyl-3-(4-chlorophenyl)-1-(2-((trimethylsilyl)ethynyl)phenyl)urea (**6a**)

Synthesised in accordance with *General Procedure c* using BCl<sub>3</sub> (1 M in hexane, 5 μL, 0.005 mmol), *N*-benzyl-2-((trimethylsilyl)ethynyl)aniline (28 mg, 0.10 mmol), and 4-chlorophenyl isocyanate (23 mg, 0.15 mmol) in 1,2-C<sub>2</sub>H<sub>4</sub>Cl<sub>2</sub> to afford **6a**. The crude reaction mixture was purified *via* preparative thin layer chromatography using hexane/ethyl acetate as eluent. The desired compound **6a** was obtained as an off-white solid. Yield: 26 mg, 0.06 mmol, 61%.

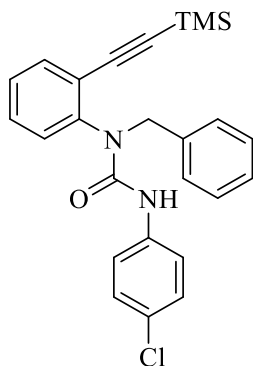

<sup>1</sup>H NMR (600 MHz, CDCl<sub>3</sub>, 298 K) δ: 7.56–7.52 (m, 1H, Ar–CH), 7.29–7.19 (m, 9H, Ar–CH), 7.15 (s, 2H, Ar–CH), 7.00–6.95 (m, 1H, Ar–CH), 6.01 (br, s, 1H, NH), 5.28 (br., s, 1H, benzyl CH)\*, 4.53 (br., s, 1H, benzyl CH), 0.13 (s, 9H, CH<sub>3</sub>); <sup>13</sup>C NMR (151 MHz, CDCl<sub>3</sub>, 298 K) δ: 154.1, 142.5, 138.0, 137.8, 134.2, 130.1, 130.0, 129.11, 129.08, 128.8, 128.5, 128.0, 127.5, 123.6, 121.0, 101.8, 100.3, 52.5, -0.2;<sup>13</sup> IR  $\nu_{\max}$  (cm<sup>-1</sup>): 3320, 2957, 2158, 1661 (C=O), 1591, 1559, 1506, 1493, 1481, 1458, 1447, 1427, 1398, 1364, 1321, 1300, 1283, 1271, 1262, 1242, 1219, 1198, 1173, 1113, 1090, 1076, 1040, 1030, 1013. HRMS (ES+) [M+H] [C<sub>25</sub>H<sub>26</sub>OSiCl]<sup>+</sup>: calculated. 433.1503, found: 433.1495.



### Synthesis of 1-benzyl-3-phenyl-1-(2-((trimethylsilyl)ethynyl)phenyl)urea (**6b**)

Synthesised in accordance with *General Procedure c* using BCl<sub>3</sub> (1 M in hexane, 5 μL, 0.005 mmol), *N*-benzyl-2-((trimethylsilyl)ethynyl)aniline (28 mg, 0.10 mmol), and phenyl isocyanate (16 μL, 0.15 mmol) in 1,2-C<sub>2</sub>H<sub>4</sub>Cl<sub>2</sub> to afford **6b**.

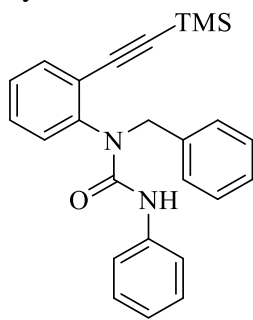

The crude reaction mixture was purified *via* preparative thin layer chromatography using hexane/ethyl acetate as eluent. The desired compound **6b** was obtained as a white solid. Yield: 19 mg, 0.05 mmol, 48%.

<sup>1</sup>H NMR (500 MHz, CDCl<sub>3</sub>, 298 K) δ: 7.60–7.53 (m, 1H, Ar–CH), 7.32–7.19 (m, 11H, Ar–CH), 7.03–6.94 (m, 2H, Ar–CH), 6.03 (br., s, 1H, NH), 5.34 (br., s, 1H, benzyl CH), 4.62 (br s, 1H, benzyl CH), 0.16 (s, 9H, CH<sub>3</sub>); <sup>13</sup>C NMR (126 MHz, CDCl<sub>3</sub>, 298 K) δ: 154.3, 142.7, 139.2, 138.2, 134.2, 130.1, 130.0, 129.1, 128.8, 128.4, 128.3, 127.4, 123.6, 123.1, 119.8, 101.6, 100.5, 52.4, -0.2; <sup>13</sup> IR ν<sub>max</sub> (cm<sup>-1</sup>): 3428, 3061, 3030, 2957, 2160, 1674 (C=O), 1595, 1518, 1501, 1483, 1439, 1400, 1364, 1310, 1269, 1248, 1219, 1196, 1155, 1109, 1078, 1044, 1030. HRMS (ES<sup>+</sup>) [M+H] [C<sub>25</sub>H<sub>27</sub>N<sub>2</sub>OSi]<sup>+</sup>: calculated. 399.1893, found: 399.1886.

### Synthesis of 1-benzyl-3-(4-methoxyphenyl)-1-(2-((trimethylsilyl)ethynyl)phenyl)urea (**6c**)

Synthesised in accordance with *General Procedure c* using BCl<sub>3</sub> (1 M in hexane, 5 μL, 0.005 mmol), *N*-benzyl-2-((trimethylsilyl)ethynyl)aniline (28 mg, 0.10 mmol), and 4-methoxyphenyl isocyanate (19 μL, 0.15 mmol) in 1,2-C<sub>2</sub>H<sub>4</sub>Cl<sub>2</sub> to afford **6c**.

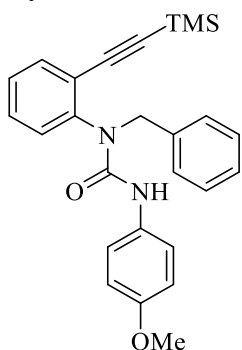

The crude reaction mixture was purified *via* preparative thin layer chromatography using hexane/ethyl acetate as eluent. The desired compound **6c** was obtained as a light brown solid. Yield: 25 mg, 0.06 mmol, 58%.

<sup>1</sup>H NMR (500 MHz, CDCl<sub>3</sub>, 298 K) δ: 7.56–7.52 (m, 1H, Ar–CH), 7.29–7.16 (m, 10H, Ar–CH), 7.02–6.96 (m, 1H, Ar–CH), 6.77 (d, *J* = 8.9 Hz, 2H, Ar–CH), 5.88 (br., s, 1H, NH), 5.32 (br., s, 1H, benzyl CH), 4.58 (br., s, 1H, benzyl CH) 3.74 (s, 3H, OMe), 0.17 (s, 9H, CH<sub>3</sub>); <sup>13</sup>C NMR (126 MHz, CDCl<sub>3</sub>, 298 K) δ: 155.9, 154.8, 142.9, 138.3, 134.2, 132.3, 130.2, 130.0, 129.1, 128.4, 128.2, 127.3, 123.6, 122.2, 114.1, 101.5, 100.6, 55.6, 52.4, -0.1; <sup>13</sup> IR ν<sub>max</sub> (cm<sup>-1</sup>): 3429, 2955, 2160, 1670. (C=O), 1595, 1510, 1483, 1464, 1447, 1410, 1356, 1296, 1219, 1196, 1179, 1109, 1074, 1032. HRMS (ES<sup>+</sup>) [M+H] [C<sub>26</sub>H<sub>29</sub>N<sub>2</sub>O<sub>2</sub>Si]<sup>+</sup>: calculated. 429.1998, found: 429.1984.

### Synthesis of 1-benzyl-3-(4-chlorophenyl)-1-(2-(phenylethynyl)phenyl)urea (**6d**)

Synthesised in accordance with *General Procedure c* using BCl<sub>3</sub> (1 M in hexane, 5 μL, 0.005 mmol), *N*-benzyl-2-(phenylethynyl)aniline (28 mg, 0.10 mmol), and 4-chlorophenyl isocyanate (23 mg, 0.15 mmol) in 1,2-C<sub>2</sub>H<sub>4</sub>Cl<sub>2</sub> to afford **6d**. The crude reaction mixture was purified *via* preparative thin layer chromatography using hexane/ethyl acetate as eluent. The desired compound **6d** was obtained as an off-white solid. Yield: 27 mg, 0.06 mmol, 62%.

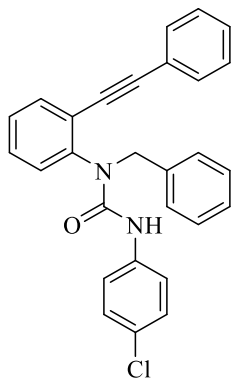

<sup>1</sup>H NMR (500 MHz, CDCl<sub>3</sub>, 298 K) δ: 7.63 (dd, *J* = 7.6, 1.7 Hz, 1H, Ar-CH), 7.44 (m, 2H, Ar-CH), 7.38–7.26 (m, 7H, Ar-CH), 7.26–7.18 (m, 5H, Ar-CH), 7.15 (d, *J* = 8.8 Hz, 2H, Ar-CH), 7.05 (d, *J* = 9.2 Hz, 1H, Ar-CH), 6.09 (br., s, 1H, NH), 5.37 (br., s, 1H, benzyl CH), 4.60 (br., s, 1H, benzyl CH); <sup>13</sup>C NMR (126 MHz, CDCl<sub>3</sub>, 298 K) δ: 154.4, 141.9, 137.9, 137.6, 133.8, 131.9, 130.2, 129.8, 129.1, 129.0, 128.8, 128.7, 128.6, 128.4, 128.0, 127.5, 123.8, 122.4, 121.1, 95.8, 85.0, 52.7; <sup>13</sup> IR ν<sub>max</sub> (cm<sup>-1</sup>): 3422, 3318, 3061, 3030, 2922, 2853, 1667 (C=O), 1591, 1508, 1491, 1447, 1398, 1358, 1304, 1285, 1234, 1200, 1177, 1159, 1090, 1070, 1042, 1026, 1011. HRMS (ES<sup>+</sup>) [M+H] [C<sub>28</sub>H<sub>22</sub>N<sub>2</sub>OCl]<sup>+</sup>: calculated. 437.1421, found: 429.1415.

### Synthesis of 1-benzyl-3-phenyl-1-(2-(phenylethynyl)phenyl)urea (**6e**)

Synthesised in accordance with *General Procedure c* using BCl<sub>3</sub> (1 M in hexane, 5 μL, 0.005 mmol), *N*-benzyl-2-(phenylethynyl)aniline (28 mg, 0.10 mmol), and phenyl isocyanate (16 μL, 0.15 mmol) in 1,2-C<sub>2</sub>H<sub>4</sub>Cl<sub>2</sub> to afford **6e**. The crude reaction mixture was purified *via* preparative thin layer chromatography using hexane/ethyl acetate as eluent. The desired compound **6e** was obtained as a yellow solid. Yield: 18 mg, 0.04 mmol, 45%.

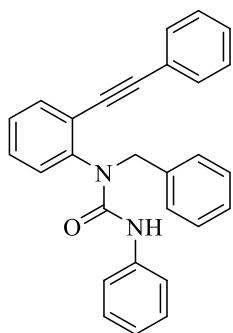

<sup>1</sup>H NMR (500 MHz, CDCl<sub>3</sub>, 298 K) δ: 7.65 (d, *J* = 7.7 Hz, 1H, Ar-CH), 7.48 (d, *J* = 1.6 Hz, 2H, Ar-CH), 7.33 (m, 9H, Ar-CH), 7.25–7.17 (m, 5H, Ar-CH), 7.06 (d, *J* = 7.7 Hz, 1H, Ar-CH), 7.01–6.95 (m, 1H, Ar-CH), 6.10 (br., s, 1H, NH), 5.35 (br., s, 1H, Benzyl CH), 4.65 (br., s, 1H, Benzyl CH); <sup>13</sup>C NMR (126 MHz, CDCl<sub>3</sub>, 298 K) δ: 154.6, 142.2, 139.1, 138.2, 133.8, 132.0, 130.3, 129.8, 129.1, 128.93, 128.89, 128.6, 128.5, 128.4, 127.4, 124.0, 123.2, 122.6, 120.0, 95.8, 85.2, 52.6; <sup>13</sup> IR ν<sub>max</sub> (cm<sup>-1</sup>): 3426, 3321, 3061, 3030, 2959, 2924, 1674 (C=O), 1595, 1520, 1495, 1479, 1439, 1362, 1312, 1261, 1238, 1200, 1179, 1157, 1101, 1028. HRMS (ES<sup>+</sup>) [M+H] [C<sub>28</sub>H<sub>23</sub>N<sub>2</sub>O]<sup>+</sup>: calculated. 403.1810, found: 403.1802.

### Synthesis of 1-benzyl-3-(4-methoxyphenyl)-1-(2-(phenylethynyl)phenyl)urea (**6f**)

Synthesised in accordance with *General Procedure c* using BCl<sub>3</sub> (1 M in hexane, 5 μL, 0.005

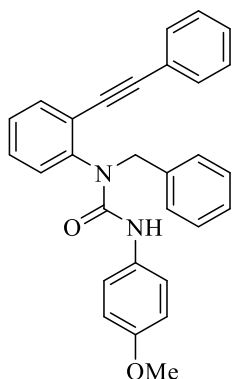

mmol), *N*-benzyl-2-(phenylethynyl)aniline (28 mg, 0.10 mmol), and 4-methoxyphenyl isocyanate (19 μL, 0.15 mmol) in 1,2-C<sub>2</sub>H<sub>4</sub>Cl<sub>2</sub> to afford

**6f**. The crude reaction mixture was purified *via* preparative thin layer chromatography using hexane/ethyl acetate as eluent. The desired compound **6f** was obtained as a brown oil. Yield: 21 mg, 0.05 mmol, 49%.

<sup>1</sup>H NMR (500 MHz, CDCl<sub>3</sub>, 298 K) δ: 7.64 (dd, *J* = 7.6, 1.7 Hz, 1H, Ar-CH), 7.51–7.47 (m, 2H, Ar-CH), 7.37–7.28 (m, 7H, Ar-CH), 7.26–7.17

(m, 5H, Ar-CH), 7.07 (dd, *J* = 7.8, 1.5 Hz, 1H, Ar-CH), 6.76 (d, *J* = 9.0 Hz, 2H, Ar-CH), 5.98

(br., s, 1H, NH), 5.38 (br., s, 1H, benzyl CH), 4.66 (br., s, 1H, benzyl CH), 3.74 (s, 3H, OMe);

<sup>13</sup>C NMR (126 MHz, CDCl<sub>3</sub>, 298 K) δ: 156.0, 155.1, 142.4, 138.3, 133.8, 132.1, 132.0, 130.3,

129.7, 129.1, 128.9, 128.52, 128.46, 128.4, 127.4, 123.9, 122.7, 122.5, 114.1, 95.6, 85.3, 55.6,

52.6;<sup>13</sup> IR ν<sub>max</sub> (cm<sup>-1</sup>): 3426, 3323, 3061, 3030, 2928, 2833, 2218, 1665(C=O), 1595, 1508,

1495, 1479, 1464, 1410, 1356, 1296, 1231, 1207, 1179, 1107, 1071, 1028. HRMS (ES<sup>+</sup>)

[M+H] [C<sub>29</sub>H<sub>25</sub>N<sub>2</sub>O<sub>2</sub>]<sup>+</sup>: calculated. 433.1916, found: 433.1909.

### Synthesis of 1-benzyl-3-(4-chlorophenyl)-1-(2-ethynylphenyl)urea (**6g**)

Synthesised in accordance with *General Procedure c* using BCl<sub>3</sub> (1 M in hexane, 5 μL, 0.005

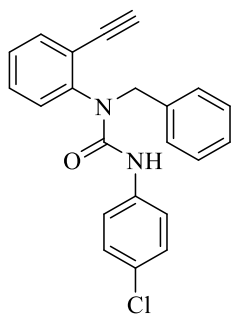

mmol), *N*-benzyl-2-ethynylaniline (21 mg, 0.10 mmol), and 4-chlorophenyl isocyanate (23 mg, 0.15 mmol) in 1,2-C<sub>2</sub>H<sub>4</sub>Cl<sub>2</sub> to afford **6g**.

The crude reaction mixture was purified *via* preparative thin layer chromatography using hexane/ethyl acetate as eluent. The desired compound **6g** was obtained as an off-white solid. Yield: 14 mg, 0.04 mmol,

39%.

<sup>1</sup>H NMR (500 MHz, CDCl<sub>3</sub>, 298 K) δ: 7.58 (dd, *J* = 7.3, 2.0 Hz, 1H, Ar-CH), 7.28 (m, 2H,

Ar-CH), 7.23–7.18 (m, 8H, Ar-CH), 7.16–7.13 (m, 2H, Ar-CH), 6.93 (dd, *J* = 7.3, 1.9 Hz,

1H, Ar-CH), 5.95 (br., s, 1H, NH), 5.35 (br., s, 1H, benzyl CH), 4.41 (br., s, 1H, benzyl CH),

3.25 (s, 1H, alkyne CH); <sup>13</sup>C NMR (126 MHz, CDCl<sub>3</sub>, 298 K) δ: 154.2, 142.5, 137.8, 137.6,

134.8, 130.44, 130.36, 129.1, 128.9, 128.7, 128.5, 128.2, 127.6, 122.7, 121.1, 83.6, 79.2,

52.5;<sup>13</sup> IR ν<sub>max</sub> (cm<sup>-1</sup>): 3271, 2922, 2853, 1655, 1589, 1571, 1514, 1487, 1435, 1424, 1400,

1372, 1360, 1312, 1287, 1262, 1238, 1225, 1188, 1177, 1090, 1076, 1049, 1026, 1011. HRMS

(ES<sup>+</sup>) [M+H] [C<sub>22</sub>H<sub>18</sub>N<sub>2</sub>OCl]<sup>+</sup>: calculated. 361.1108, found: 361.1104.

### Synthesis of 1-benzyl-1-(2-ethynylphenyl)-3-phenylurea (**6h**)

Synthesised in accordance with *General Procedure c* using BCl<sub>3</sub> (1 M in hexane, 5 μL, 0.005 mmol), *N*-benzyl-2-ethynylaniline (21 mg, 0.10 mmol), and phenyl isocyanate (16 μL, 0.15 mmol) in 1,2-C<sub>2</sub>H<sub>4</sub>Cl<sub>2</sub> to afford **6h**. The crude reaction mixture was purified *via* preparative thin layer chromatography using hexane/ethyl acetate as eluent. The desired compound **6h** was obtained as an off-white solid. Yield: 13 mg, 0.04 mmol, 40%.

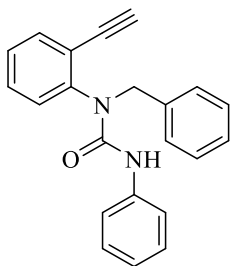

<sup>1</sup>H NMR (500 MHz, CDCl<sub>3</sub>, 298 K) δ: 7.63 (dd, *J* = 7.3, 2.0 Hz, 1H, Ar-CH), 7.37–7.27 (m, 8H, Ar-CH), 7.24 (m, 3H, Ar-CH), 7.04–6.97 (m, 2H, Ar-CH), 6.00 (br., s, 1H, NH), 5.00 (br., s, 2H, benzyl CH<sub>2</sub>), 3.30 (s, 1H, alkyne CH); <sup>13</sup>C NMR (126 MHz, CDCl<sub>3</sub>, 298 K) δ: 154.4, 142.7, 139.0, 138.1, 134.7, 130.5, 130.4, 129.1, 128.9, 128.6, 128.5, 127.5, 123.2, 122.8, 119.9, 83.5, 79.3, 52.4.<sup>13</sup> IR ν<sub>max</sub> (cm<sup>-1</sup>): 3291, 3260, 3061, 3030, 2924, 2853, 1655 (C=O), 1616, 1595, 1568, 1559, 1522, 1503, 1486, 1439, 1368, 1312, 1242, 1211, 1188, 1157, 1078, 1044, 1028. HRMS (ES<sup>+</sup>) [M+H] [C<sub>22</sub>H<sub>19</sub>N<sub>2</sub>O]<sup>+</sup>: calculated. 327.1497, found: 327.1490.

### Synthesis of 1-benzyl-1-(2-ethynylphenyl)-3-(4-methoxyphenyl)urea (**6i**)

Synthesised in accordance with *General Procedure c* using BCl<sub>3</sub> (1 M in hexane, 5 μL, 0.005 mmol), *N*-benzyl-2-ethynylaniline (21 mg, 0.10 mmol), and 4-methoxyphenyl isocyanate (19 μL, 0.15 mmol) in 1,2-C<sub>2</sub>H<sub>4</sub>Cl<sub>2</sub> to afford **6i**. The crude reaction mixture was purified *via* preparative thin layer chromatography using hexane/ethyl acetate as eluent. The desired compound **6i** was obtained as a pale-yellow solid. Yield: 15 mg, 0.04 mmol, 42%.

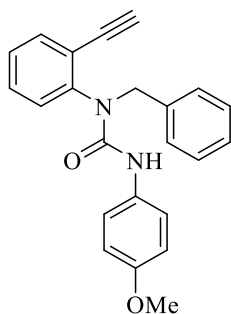

<sup>1</sup>H NMR (500 MHz, CDCl<sub>3</sub>, 298 K) δ: 7.62–7.55 (m, 1H, Ar-CH), 7.31–7.14 (m, 11H, Ar-CH), 6.97–6.93 (m, 1H, Ar-CH), 6.79–6.73 (m, 2H, Ar-CH), 5.83 (br., s, 1H, NH), 5.36 (br., s, 1H, benzyl CH), 4.50 (br., s, 1H, benzyl CH), 3.72 (s, 3H, OMe), 3.27 (s, 1H, alkyne CH); <sup>13</sup>C NMR (126 MHz, CDCl<sub>3</sub>, 298 K) δ: 156.0, 154.9, 142.9, 138.2, 134.7, 132.0, 130.5, 130.3, 129.1, 128.5, 128.4, 127.4, 122.8, 122.3, 114.2, 83.4, 79.4, 55.7, 52.4;<sup>13</sup> IR ν<sub>max</sub> (cm<sup>-1</sup>): 3426, 3283, 3063, 3030, 3001, 2930, 2833, 1663(C=O), 1595, 1510, 1483, 1464, 1447, 1412, 1356, 1314, 1296, 1233, 1211, 1179, 1107, 1074, 1030. HRMS (ES<sup>+</sup>) [M+H] [C<sub>23</sub>H<sub>21</sub>N<sub>2</sub>O<sub>2</sub>]<sup>+</sup>: calculated. 357.1603, found: 357.1593.

## 2.8 Experiments to support proposed mechanism

### Synthesis of **10**·BCl<sub>3</sub><sup>14</sup>

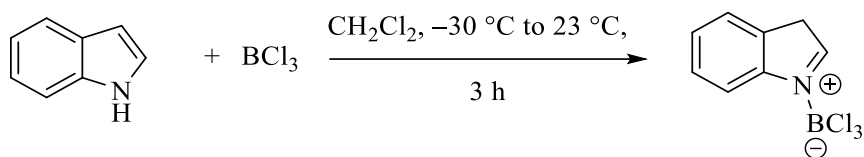

In the glovebox, indole (1 equiv, 0.6 g, 4.78 mmol) was dissolved in CH<sub>2</sub>Cl<sub>2</sub> (3 mL) and cooled

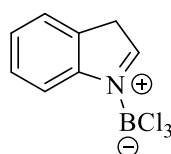

to -30 °C. To this solution, BCl<sub>3</sub> was added dropwise (1M in CH<sub>2</sub>Cl<sub>2</sub>, 4.78 mL, 4.78 mmol) and the reaction mixture was stirred at 23 °C for 3 h. Next, the solution was decanted and the pink solid obtained was washed several times with pentane. Compound **10**·BCl<sub>3</sub> was obtained as pink solid. Yield: 0.8 g, 3.23 mmol, 68%.

<sup>1</sup>H NMR (400 MHz, CD<sub>2</sub>Cl<sub>2</sub>, 298 K) δ: 9.38 (d, *J* = 3.0 Hz, 1H, indole C2), 8.30 (d, *J* = 7.3 Hz, 1H, Ar-CH), 7.61 (d, *J* = 7.1 Hz, 2H, Ar-CH), 7.52 (m, 2H, Ar-CH), 4.18 (s, 2H, indole C3); <sup>13</sup>C NMR (101 MHz, CD<sub>2</sub>Cl<sub>2</sub>, 298 K) δ: 175.5, 129.6, 128.9, 125.1, 122.2, 41.7. <sup>11</sup>B NMR (128 MHz, CD<sub>2</sub>Cl<sub>2</sub>, 298 K) δ: 5.8.

*Synthesis of N-phenyl-1H-indole-1-carboxamide (5a) using 0.05 equiv of 10·BCl<sub>3</sub> as the catalyst.*

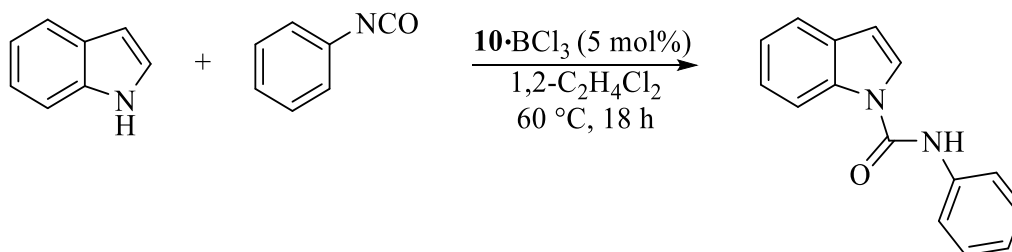

Synthesised in accordance with *General Procedure b* using **10**·BCl<sub>3</sub> (1 mg, 0.005 mmol), indole (12 mg, 0.10 mmol), and phenyl isocyanate (16 μL, 0.15 mmol) in 1,2-C<sub>2</sub>H<sub>4</sub>Cl<sub>2</sub> to afford **5a**. The solvent was removed under vacuum to afford a yellow oil which revealed formation of the product **5a** (See Figure S121 and Figure S122 for comparison of the crude <sup>1</sup>H NMR spectrum with that of compound **5a**).

### 3. NMR Spectra

Figure S1:  $^1\text{H}$  NMR (500 MHz,  $\text{CDCl}_3$ , 298 K) spectrum of **1a**.

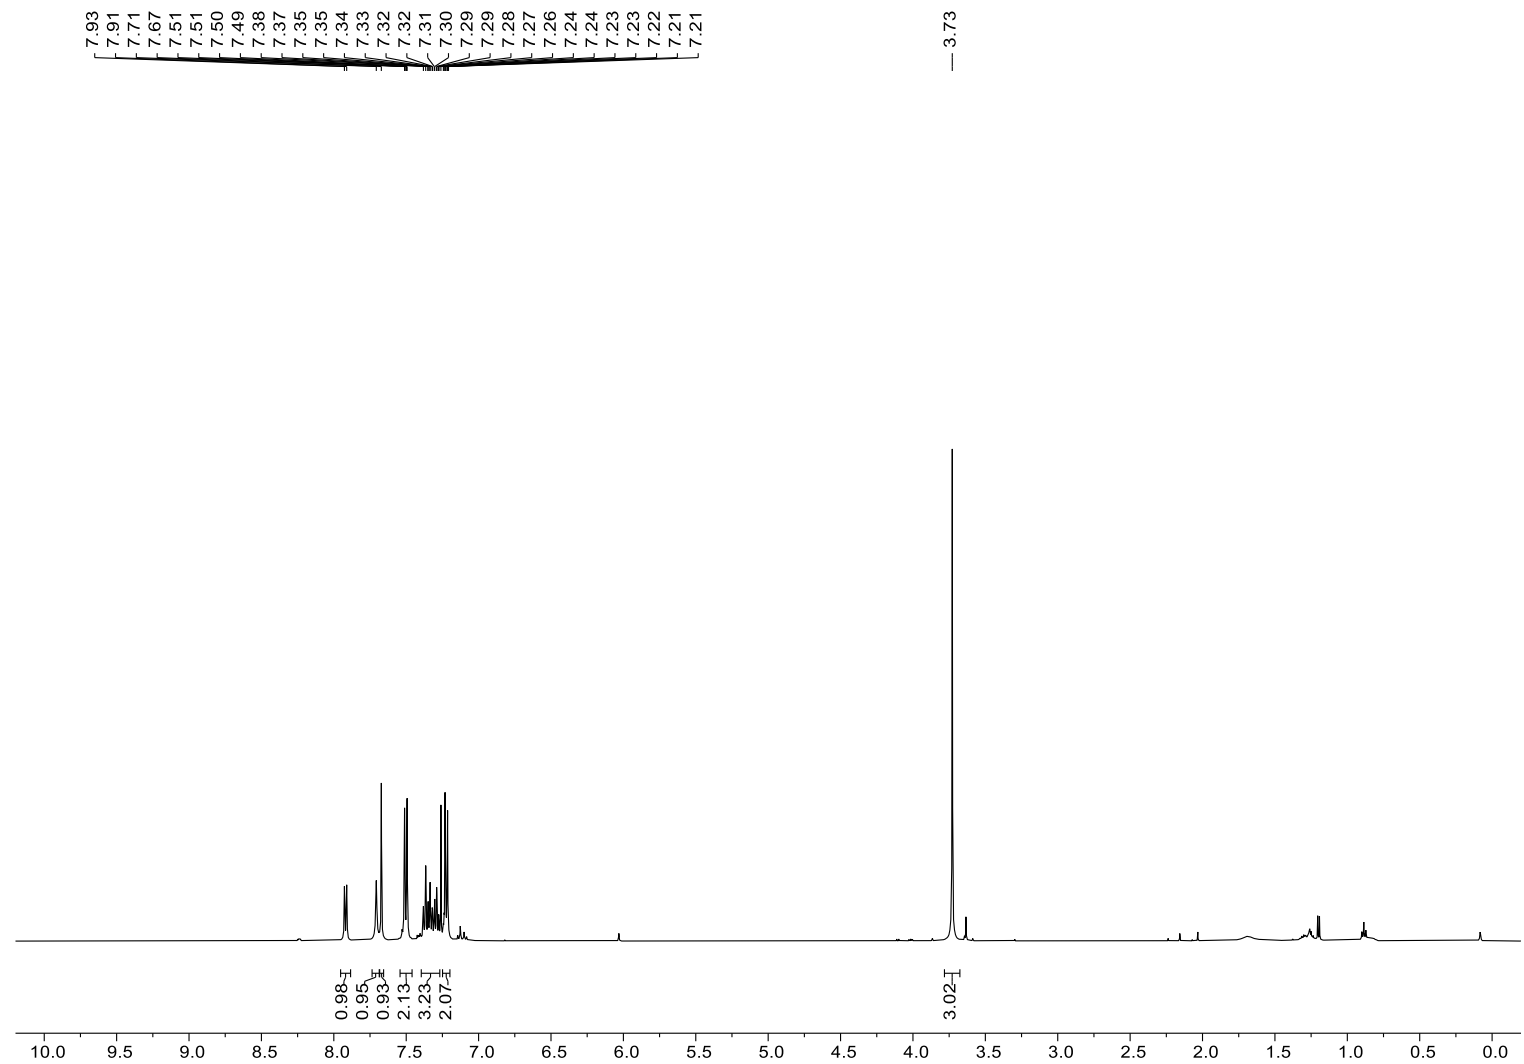

Figure S2:  $^{13}\text{C}$  NMR (126 MHz,  $\text{CDCl}_3$ , 298 K) spectrum of **1a**.

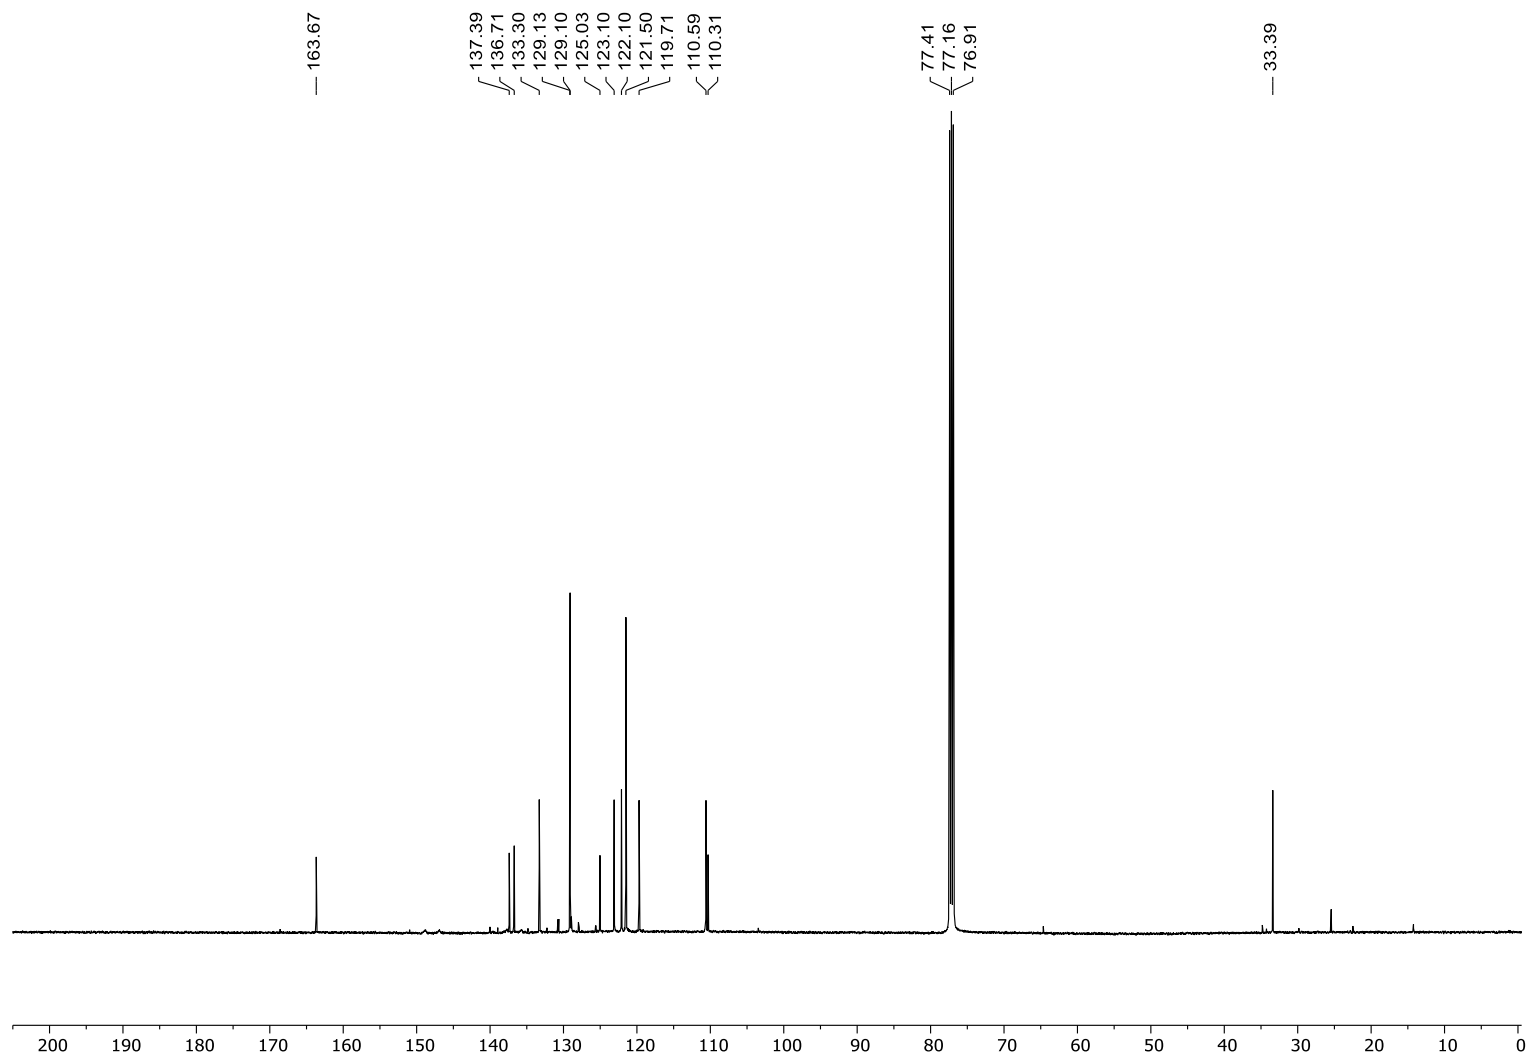

Figure S3:  $^1\text{H}$  NMR (500 MHz,  $\text{CDCl}_3$ , 298 K) spectrum of **1b**.

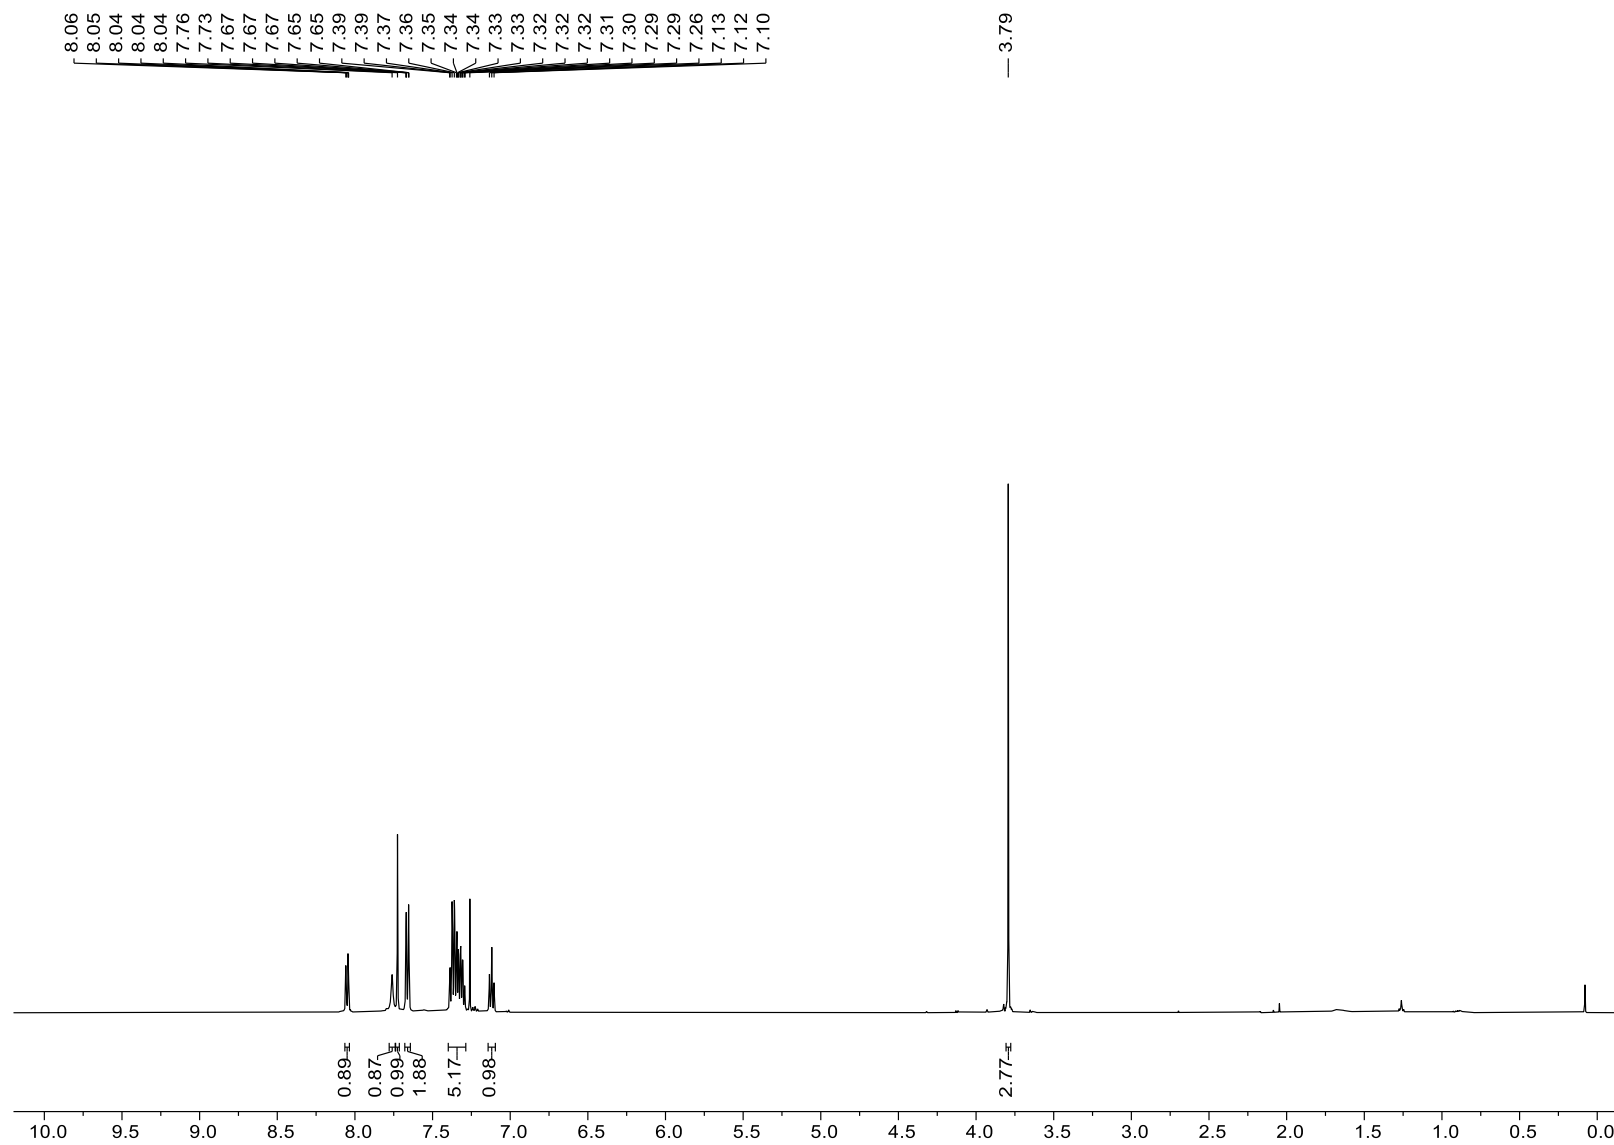



Figure S4:  $^{13}\text{C}$  NMR (126 MHz,  $\text{CDCl}_3$ , 298 K) spectrum of **1b**.

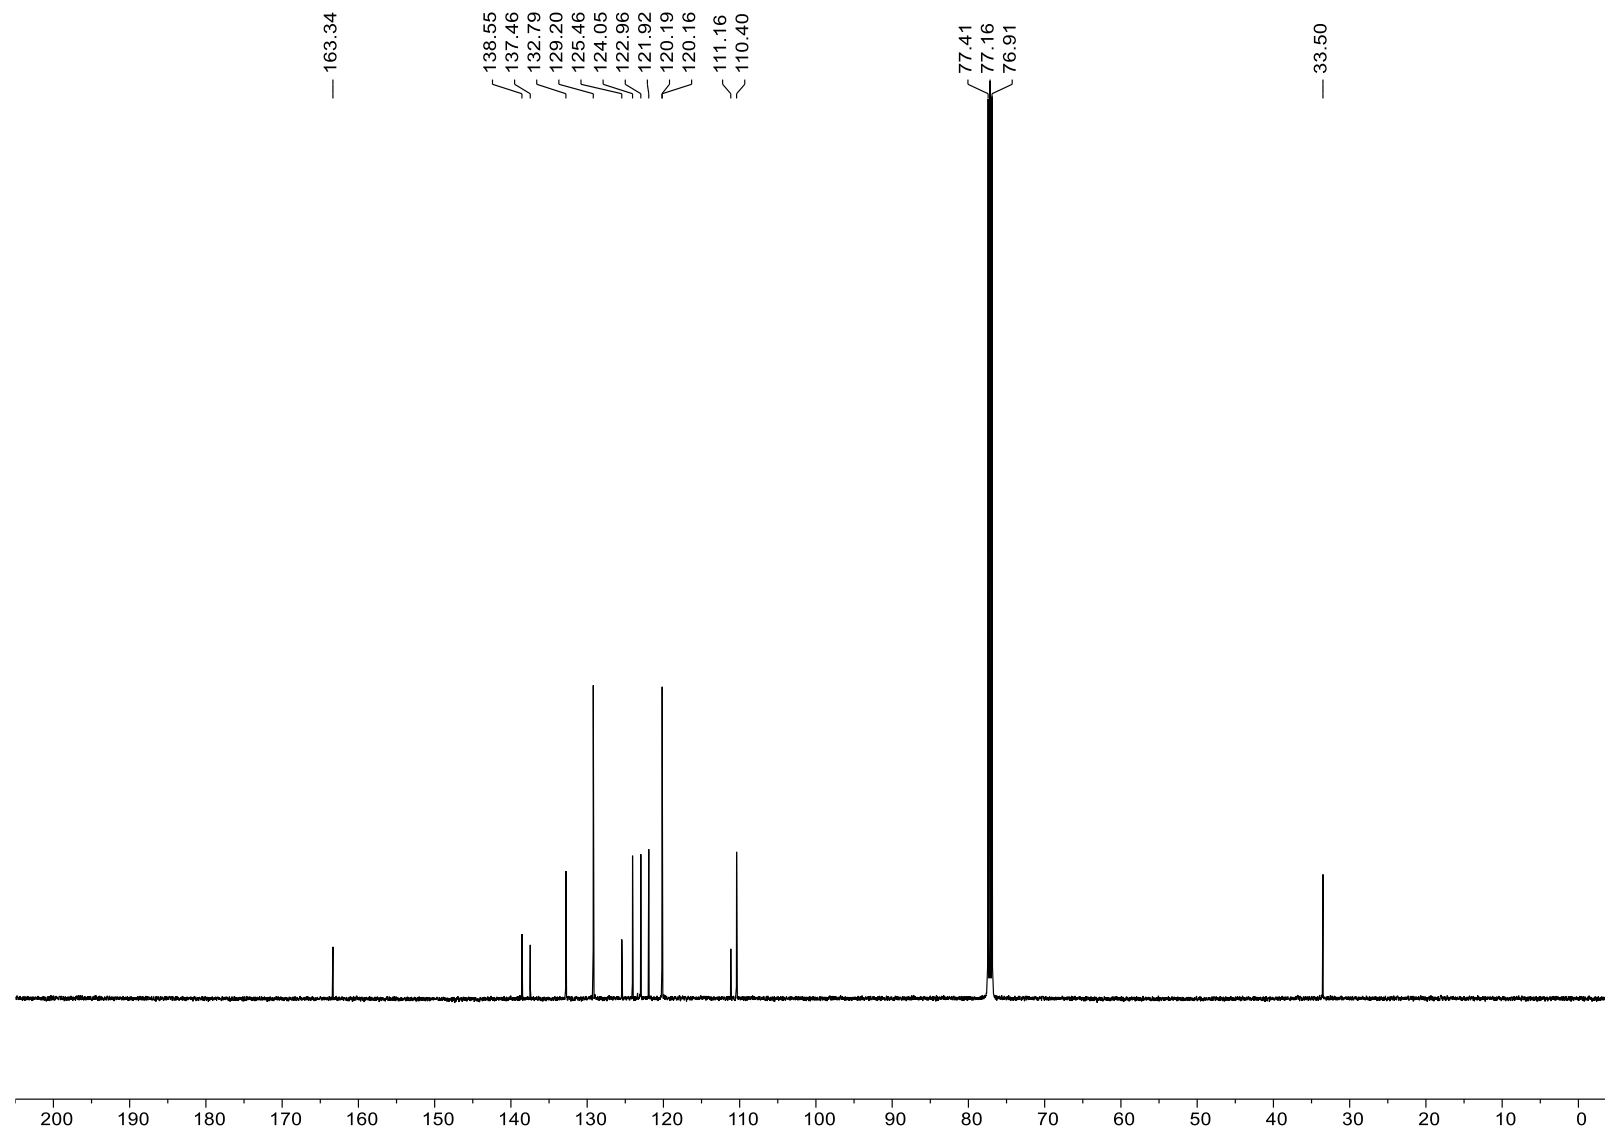

Figure S5:  $^1\text{H}$  NMR (500 MHz,  $\text{CDCl}_3$ , 298 K) spectrum of **1c**.

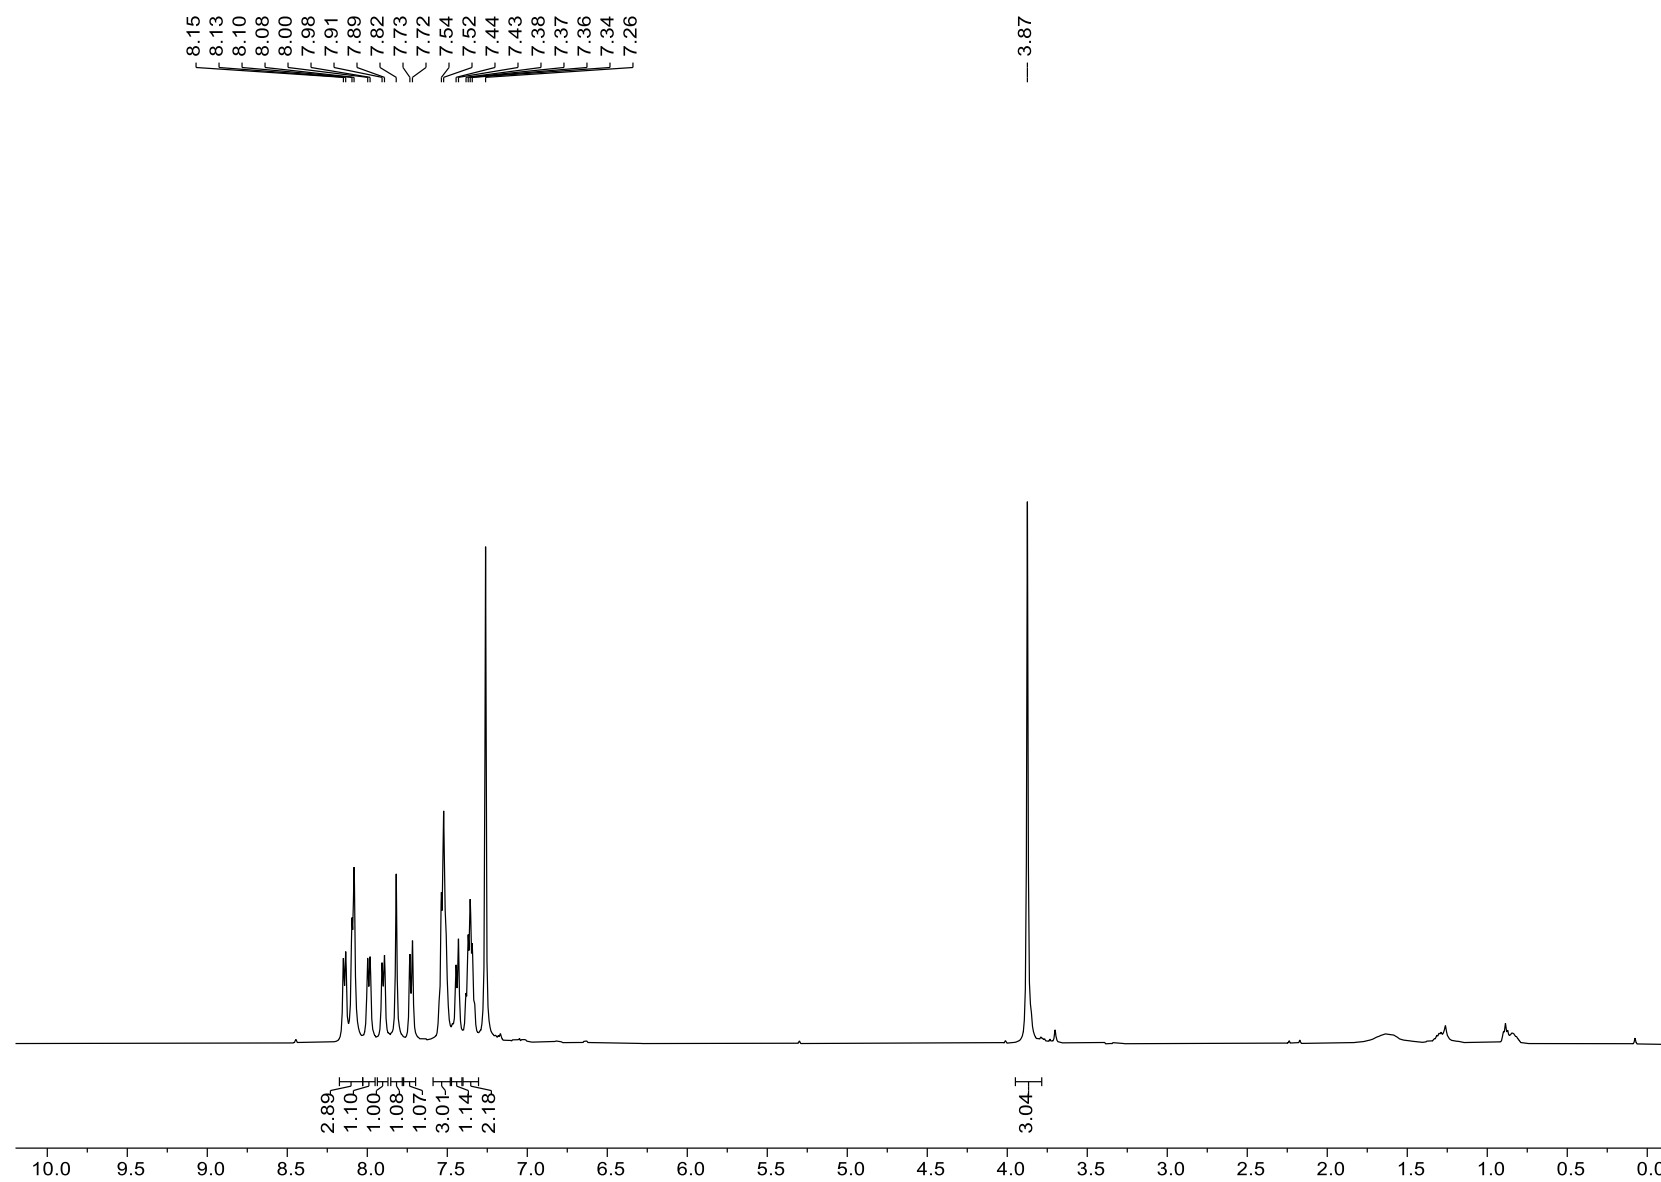

Figure S6:  $^{13}\text{C}$  NMR (126 MHz,  $\text{CDCl}_3$ , 298 K) spectrum of **1c**.

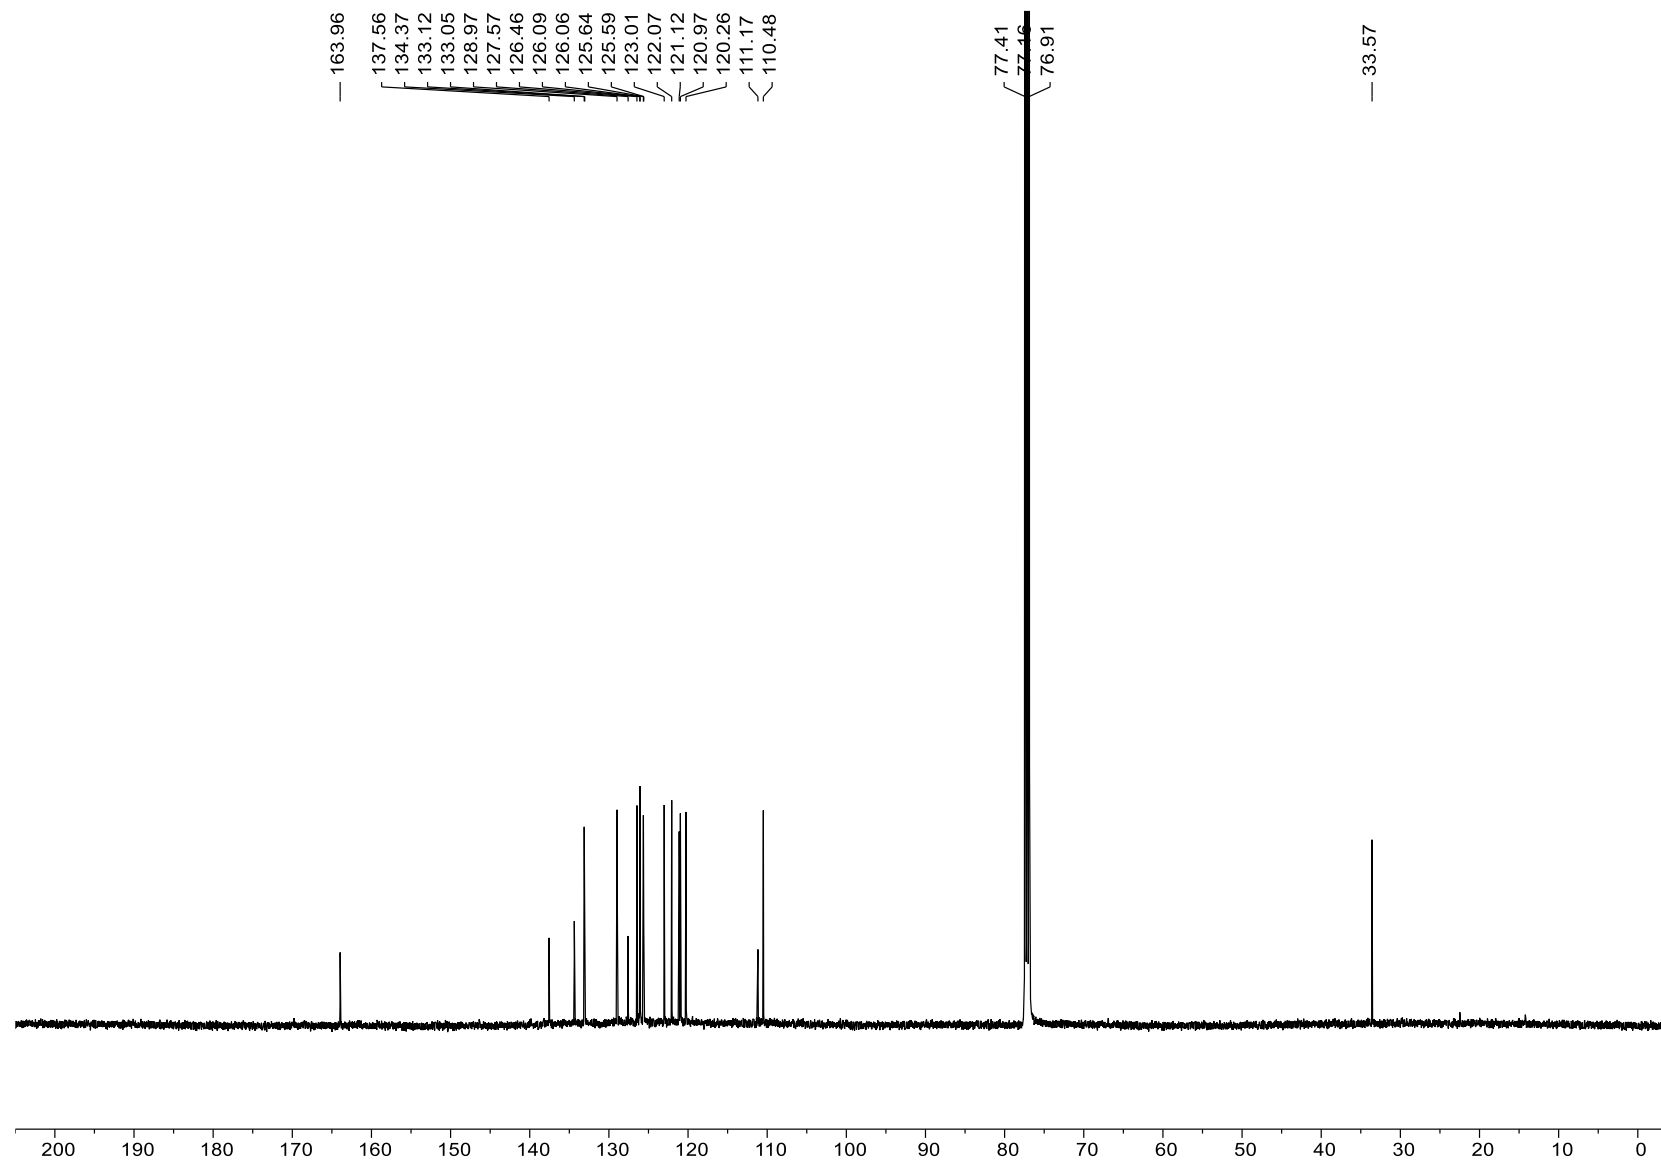

Figure S7:  $^1\text{H}$  NMR (500 MHz,  $\text{CDCl}_3$ , 298 K) spectrum of **1d**.

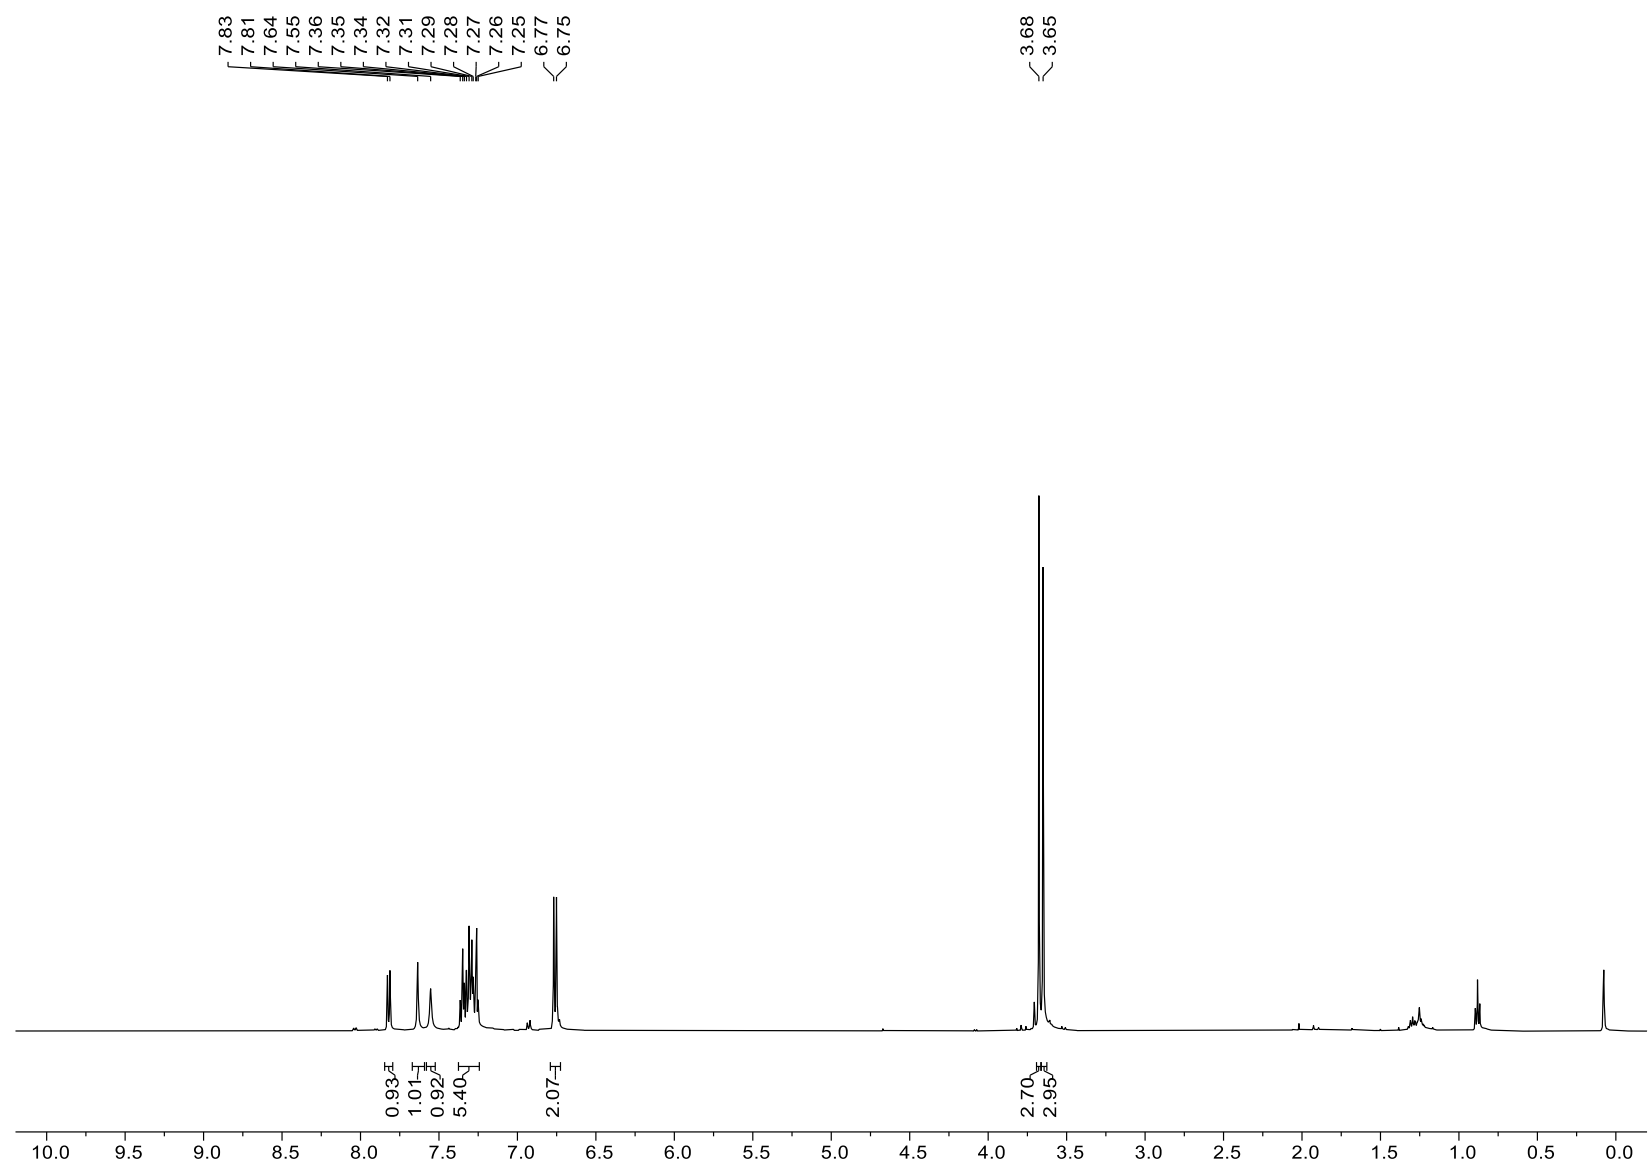

Figure S8:  $^{13}\text{C}$  NMR (126 MHz,  $\text{CDCl}_3$ , 298 K) spectrum of **1d**.

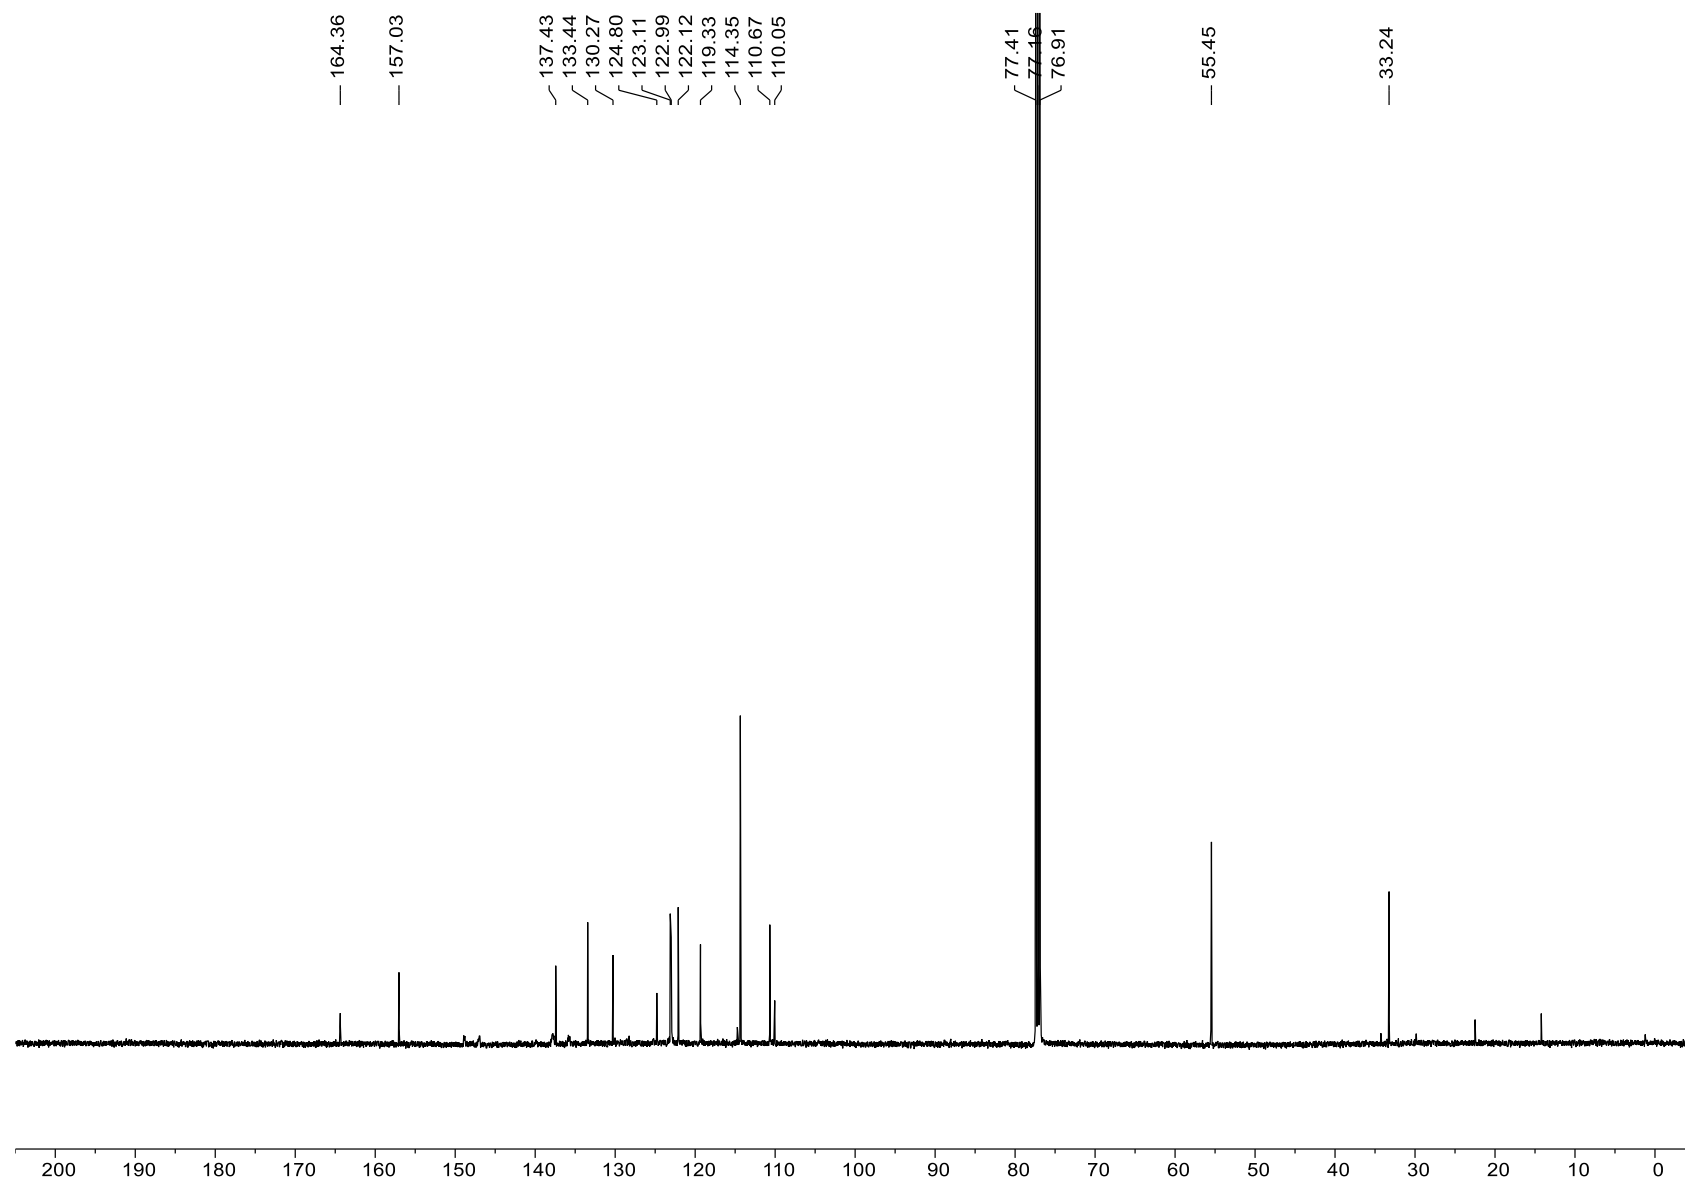

Figure S9:  $^1\text{H}$  NMR (500 MHz,  $\text{CDCl}_3$ , 298 K) spectrum of **1e**.

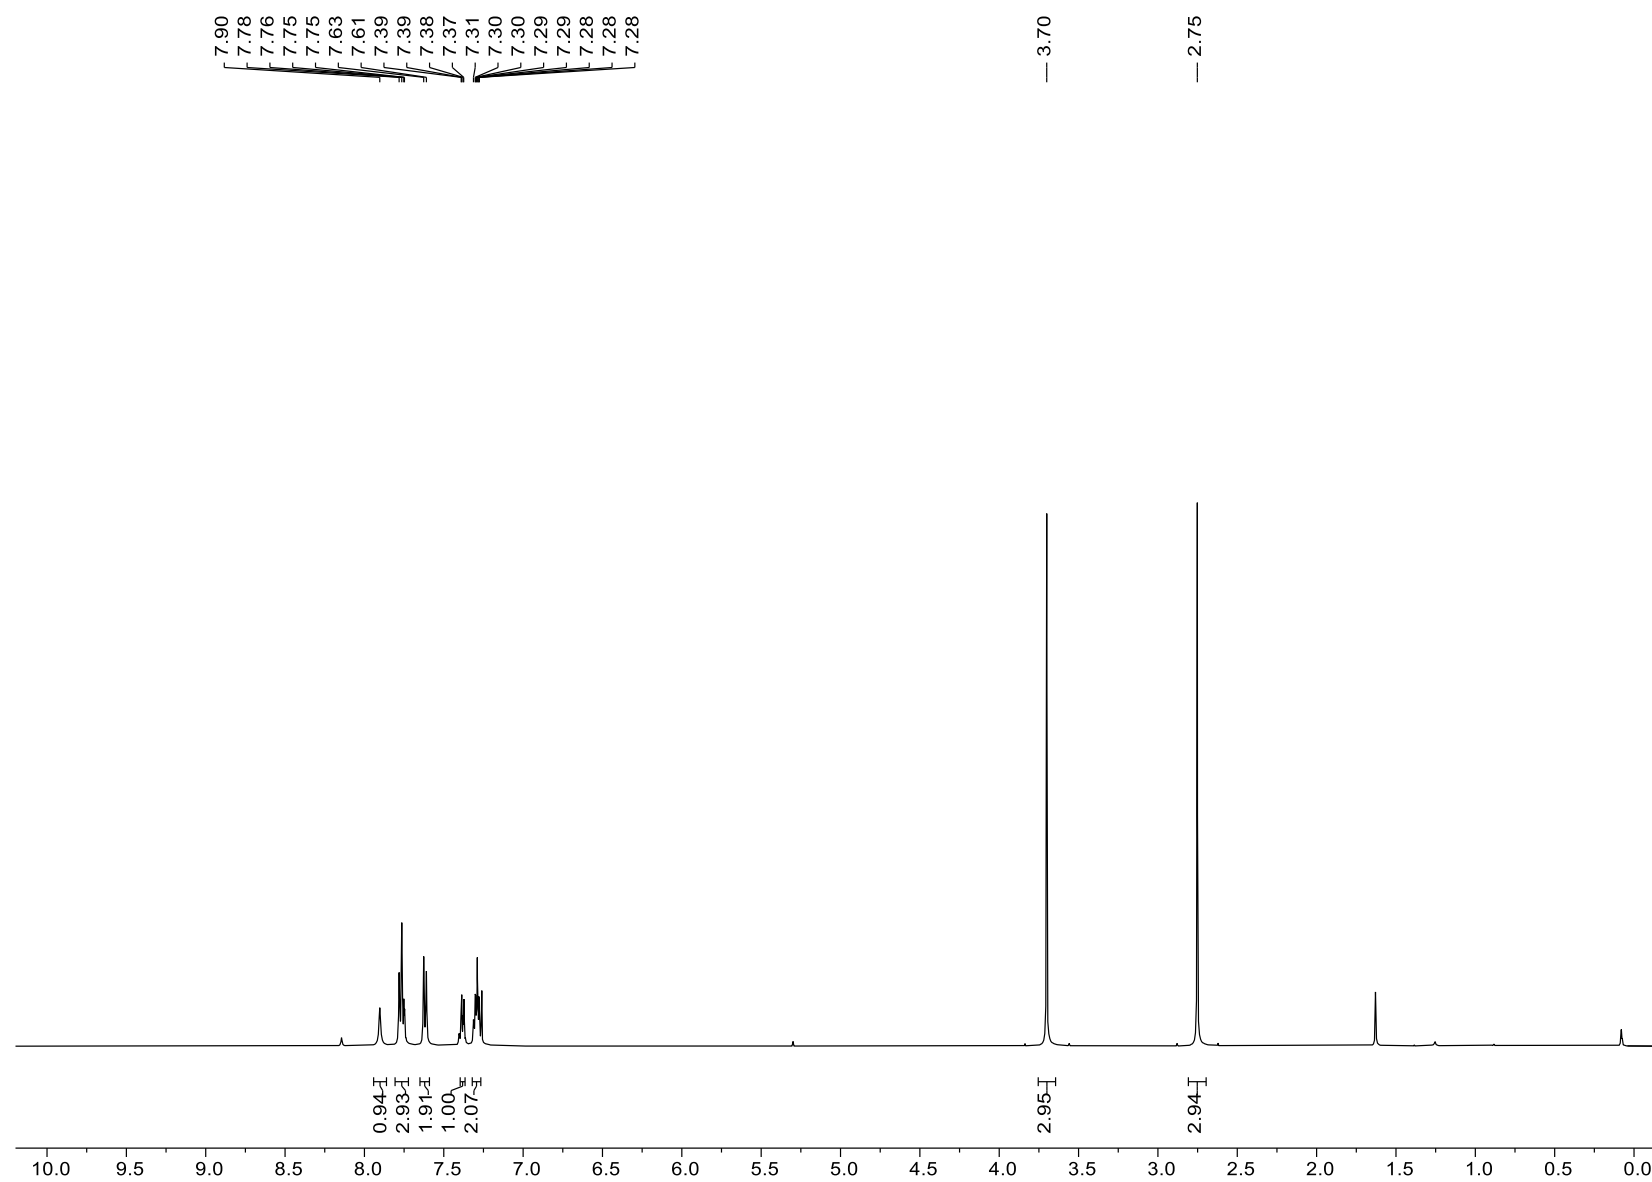

Figure S10:  $^{13}\text{C}$  NMR (126 MHz,  $\text{CDCl}_3$ , 298 K) spectrum of **1e**.

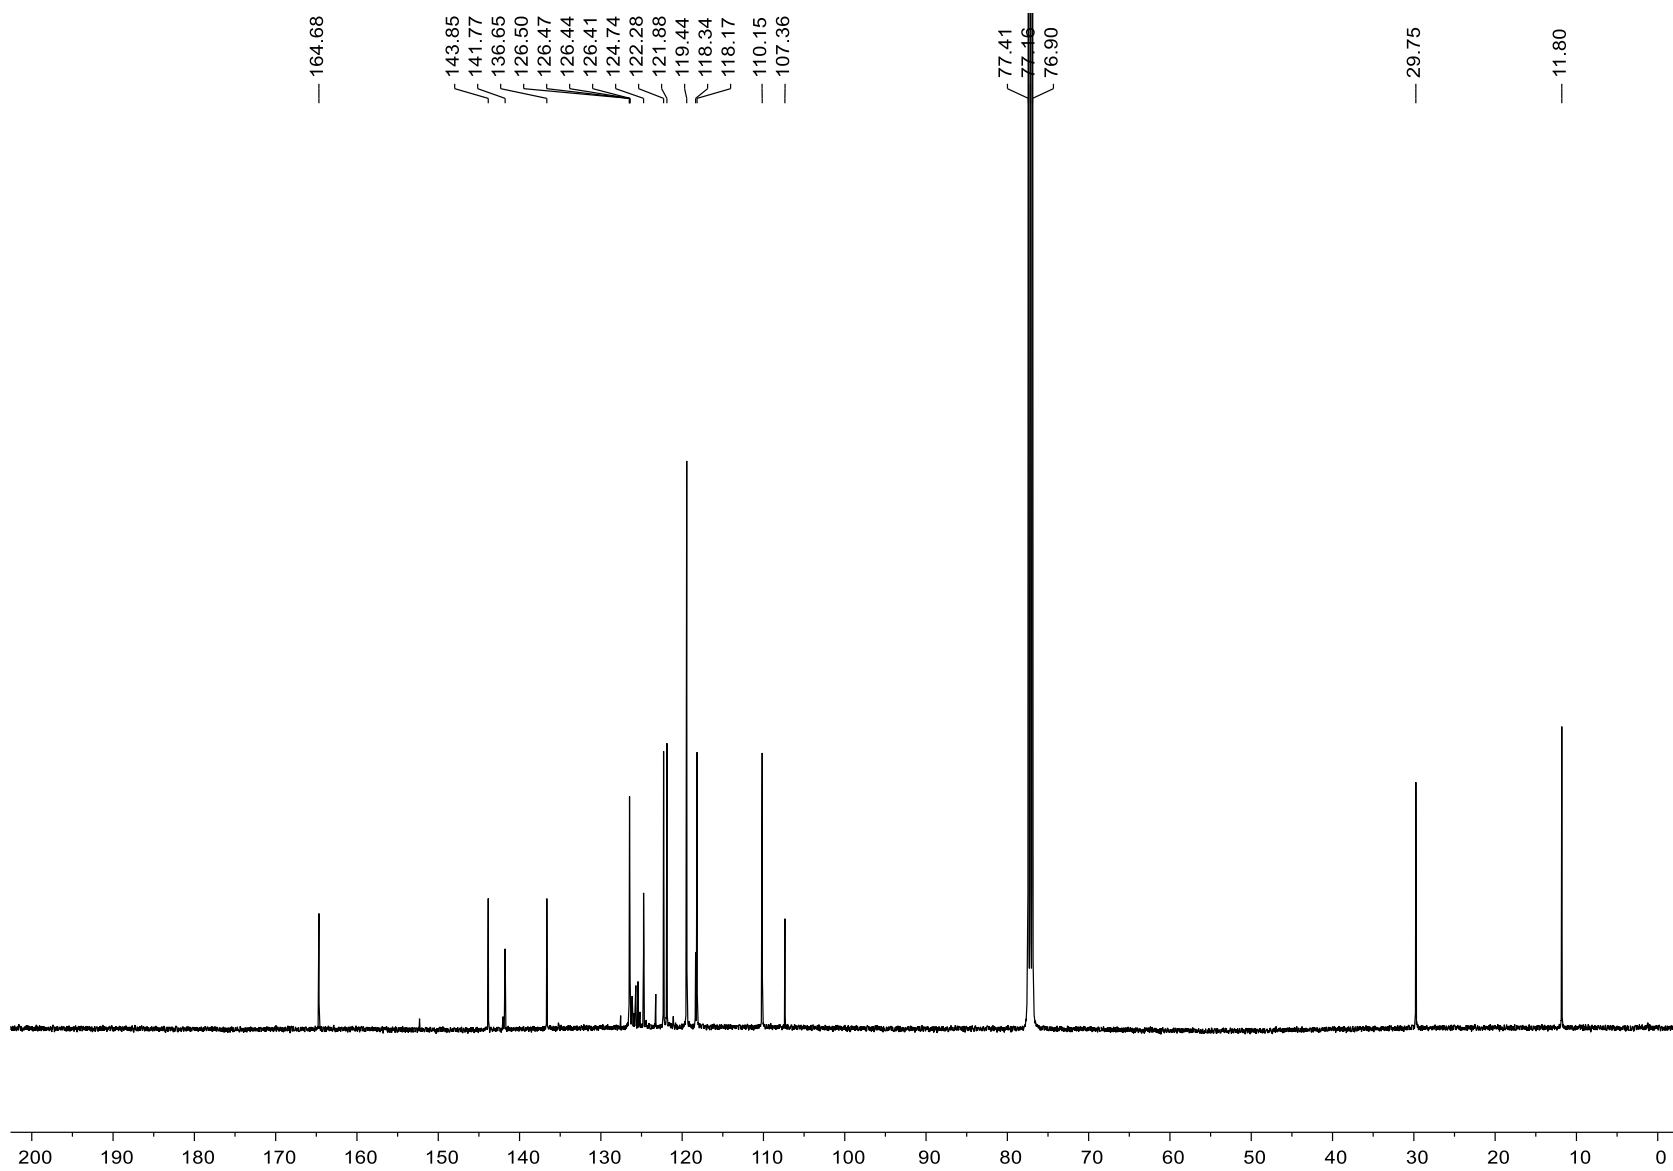

Figure S11:  $^{19}\text{F}$  NMR (471 MHz,  $\text{CDCl}_3$ , 298 K) spectrum of **1e**.

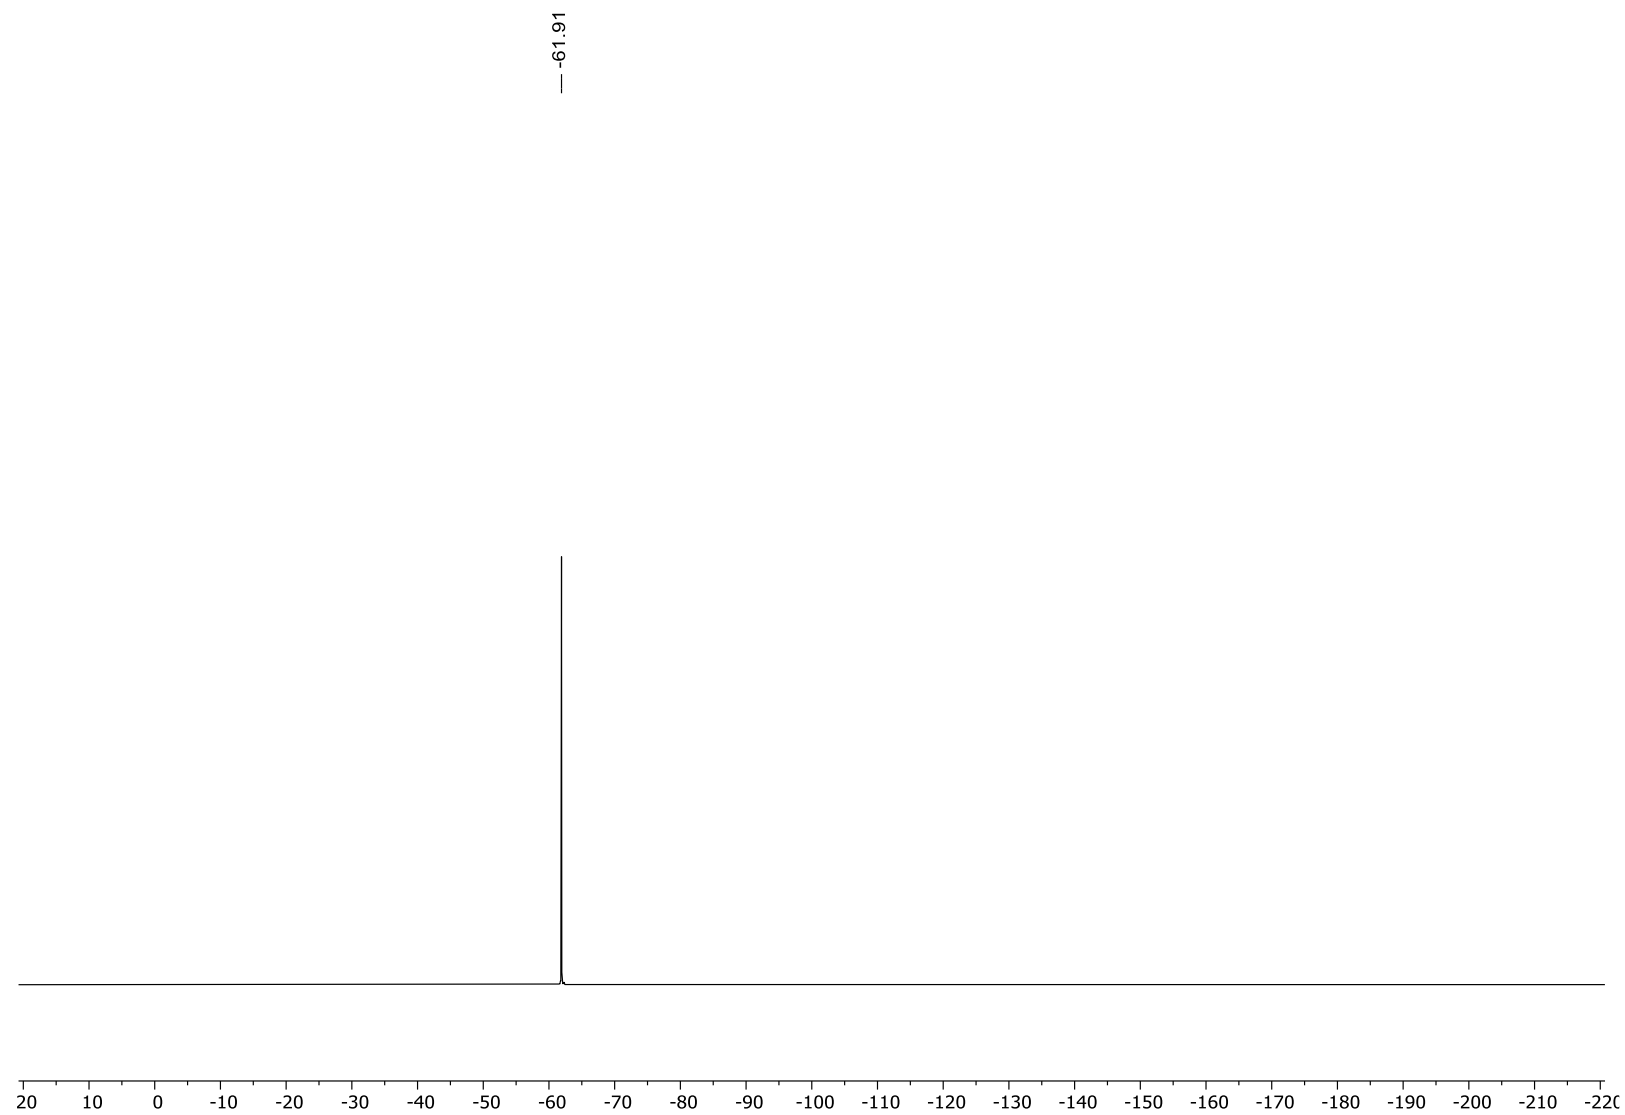



Figure S12:  $^1\text{H}$  NMR (500 MHz,  $\text{CDCl}_3$ , 298 K) spectrum of **1f**.

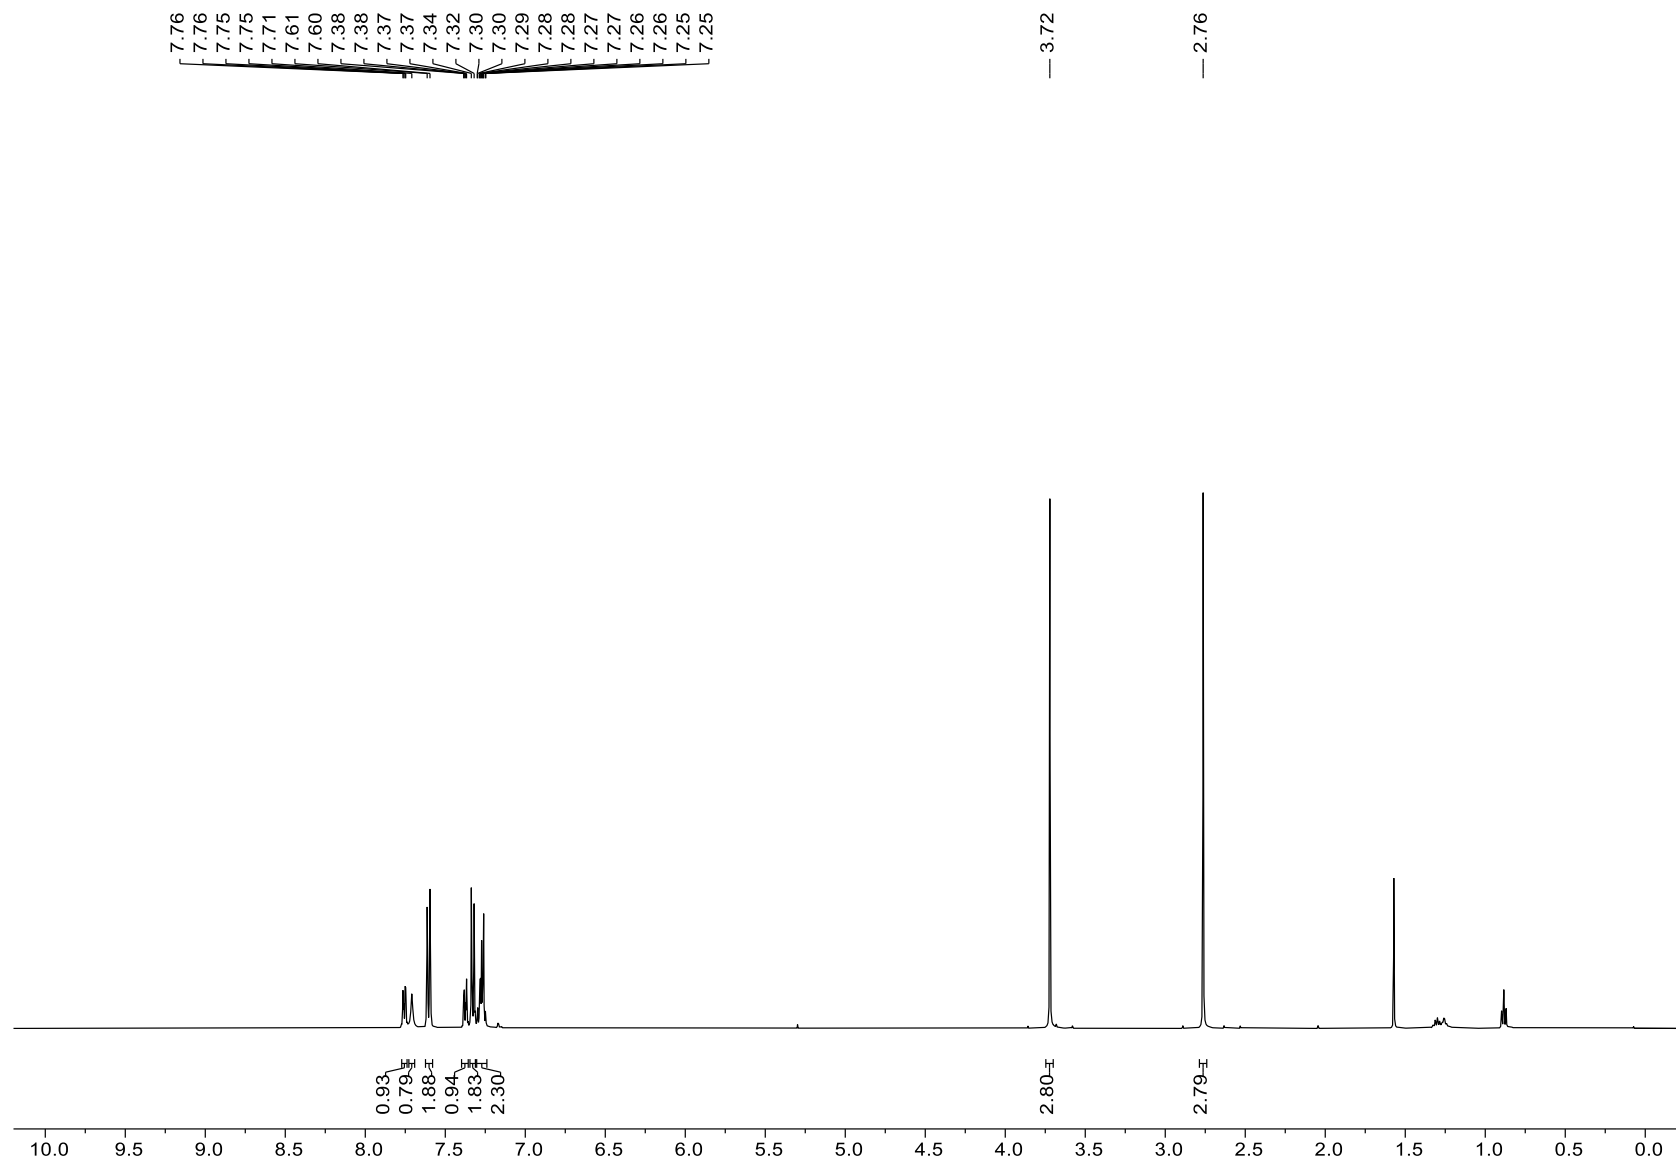

Figure S13:  $^{13}\text{C}$  NMR (126 MHz,  $\text{CDCl}_3$ , 298 K) spectrum of **1f**.

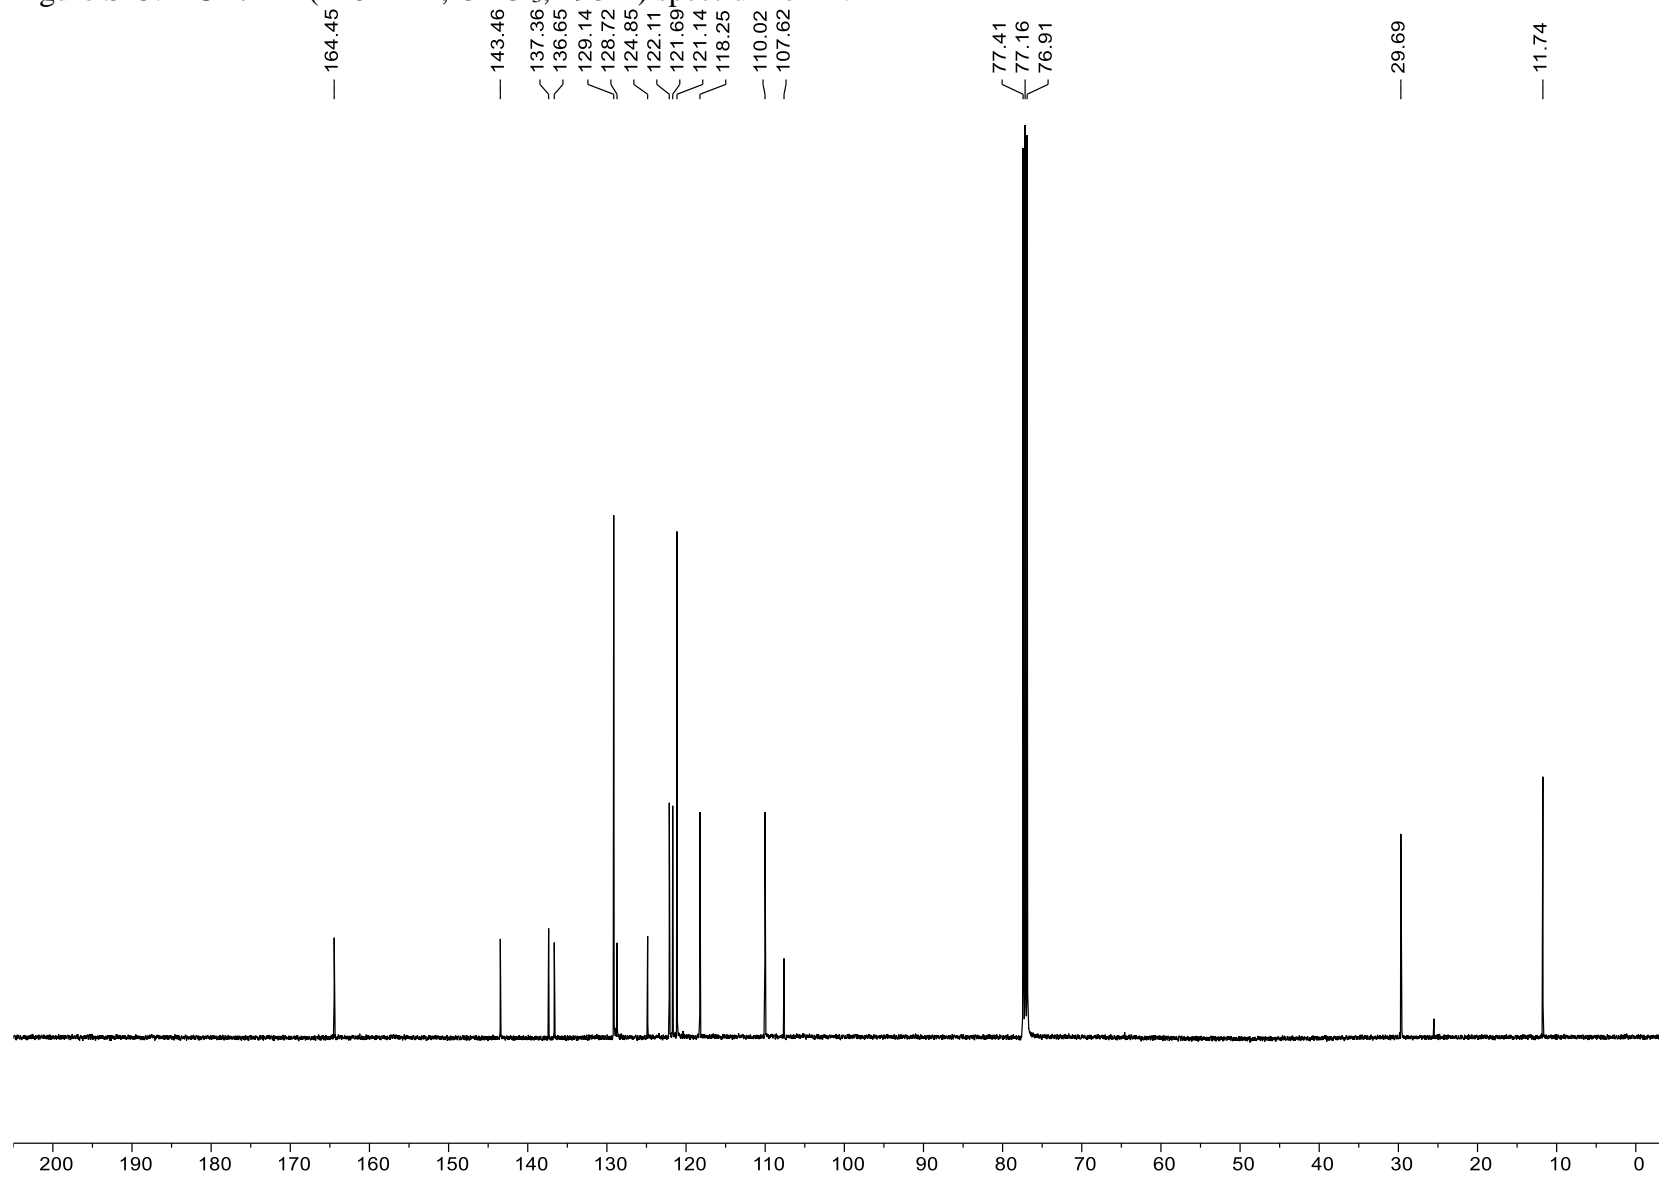

Figure S14:  $^1\text{H}$  NMR (500 MHz,  $\text{CDCl}_3$ , 298 K) spectrum of **1g**.

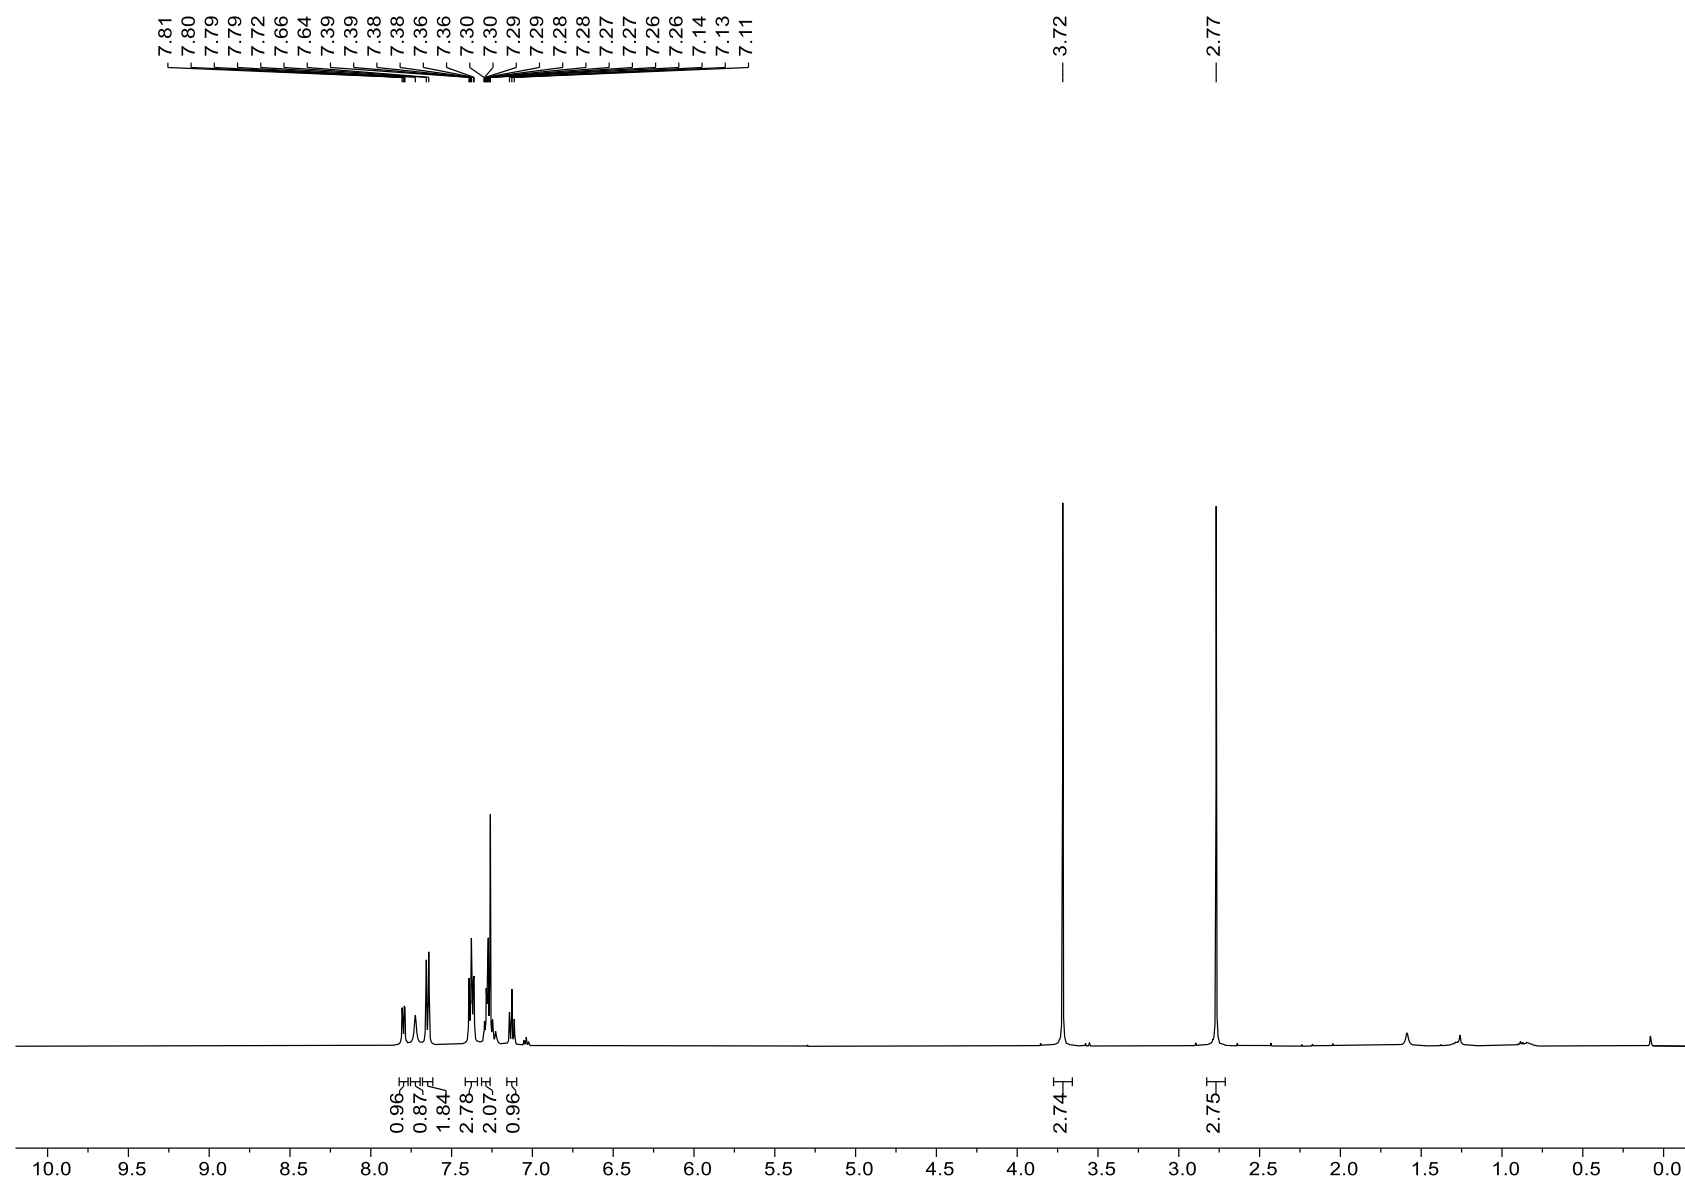

Figure S15:  $^{13}\text{C}$  NMR (126 MHz,  $\text{CDCl}_3$ , 298 K) spectrum of **1g**.

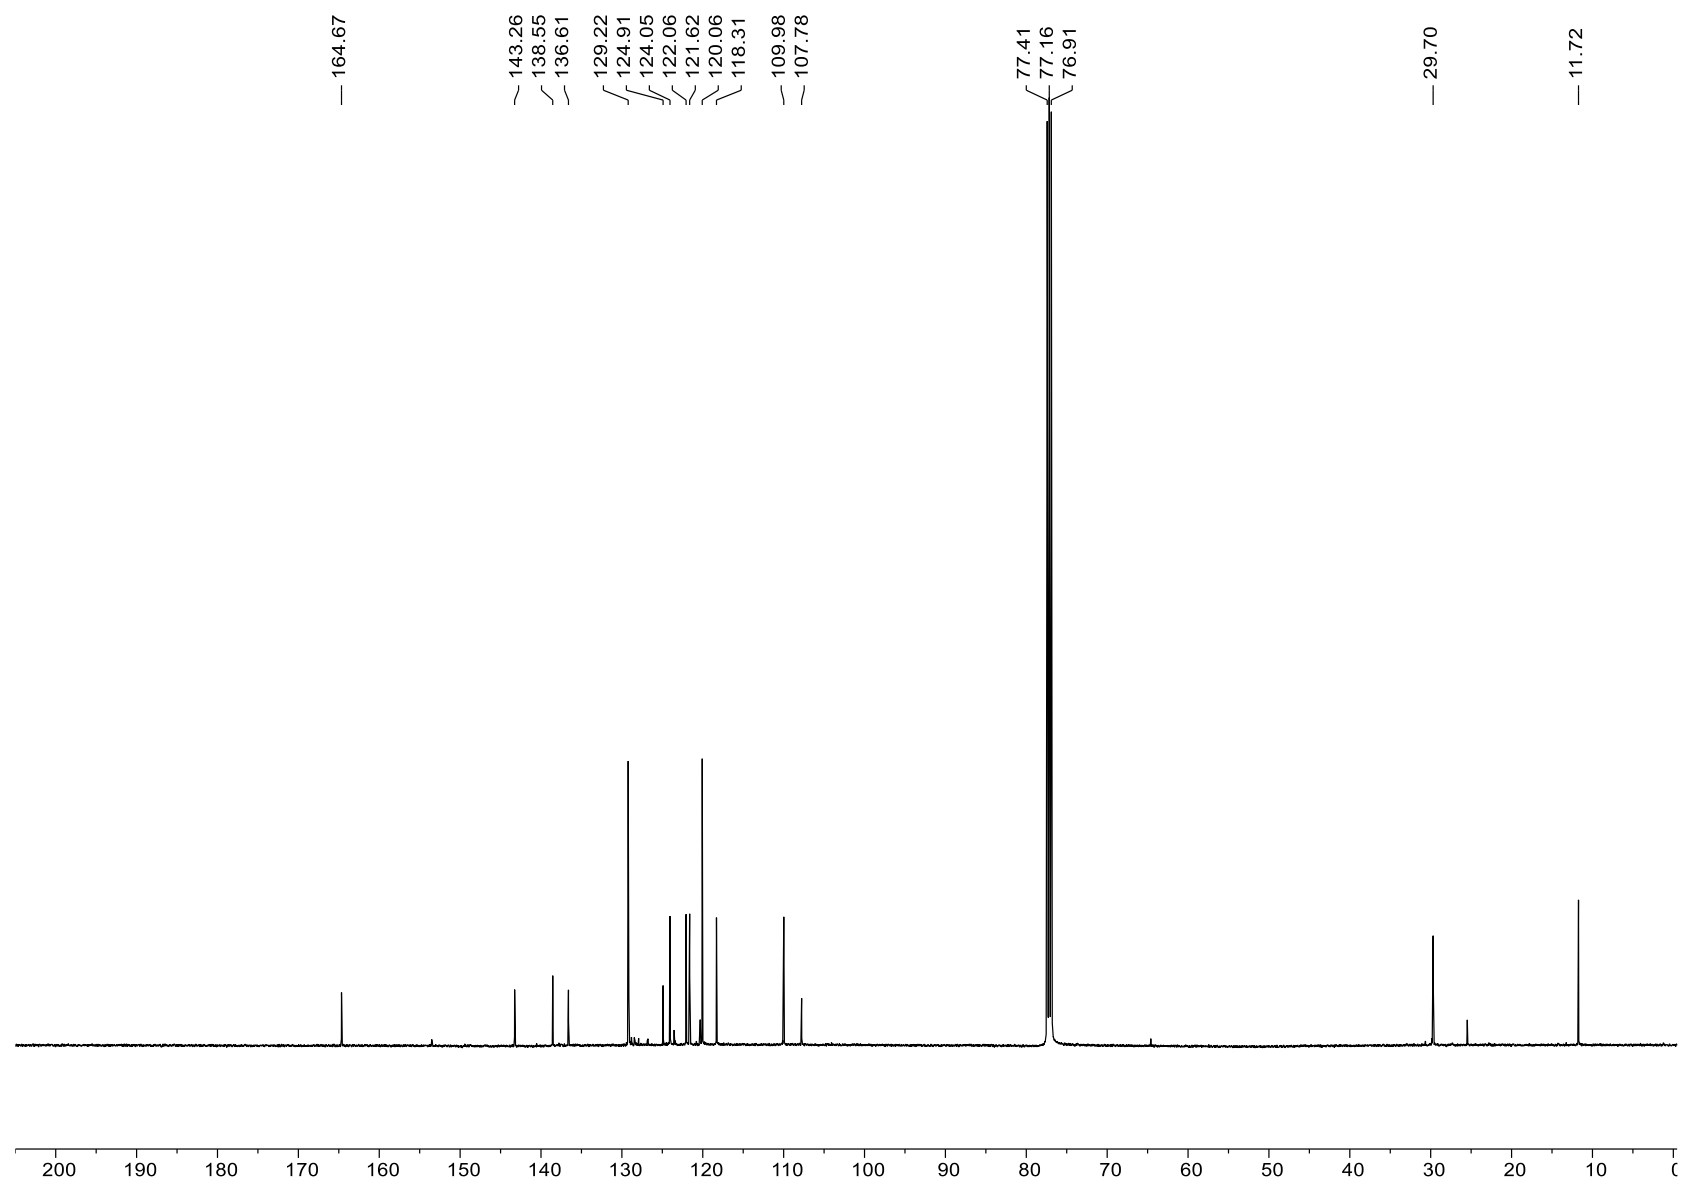

Figure S16:  $^1\text{H}$  NMR (500 MHz,  $\text{CDCl}_3$ , 298 K) spectrum of **1h**.

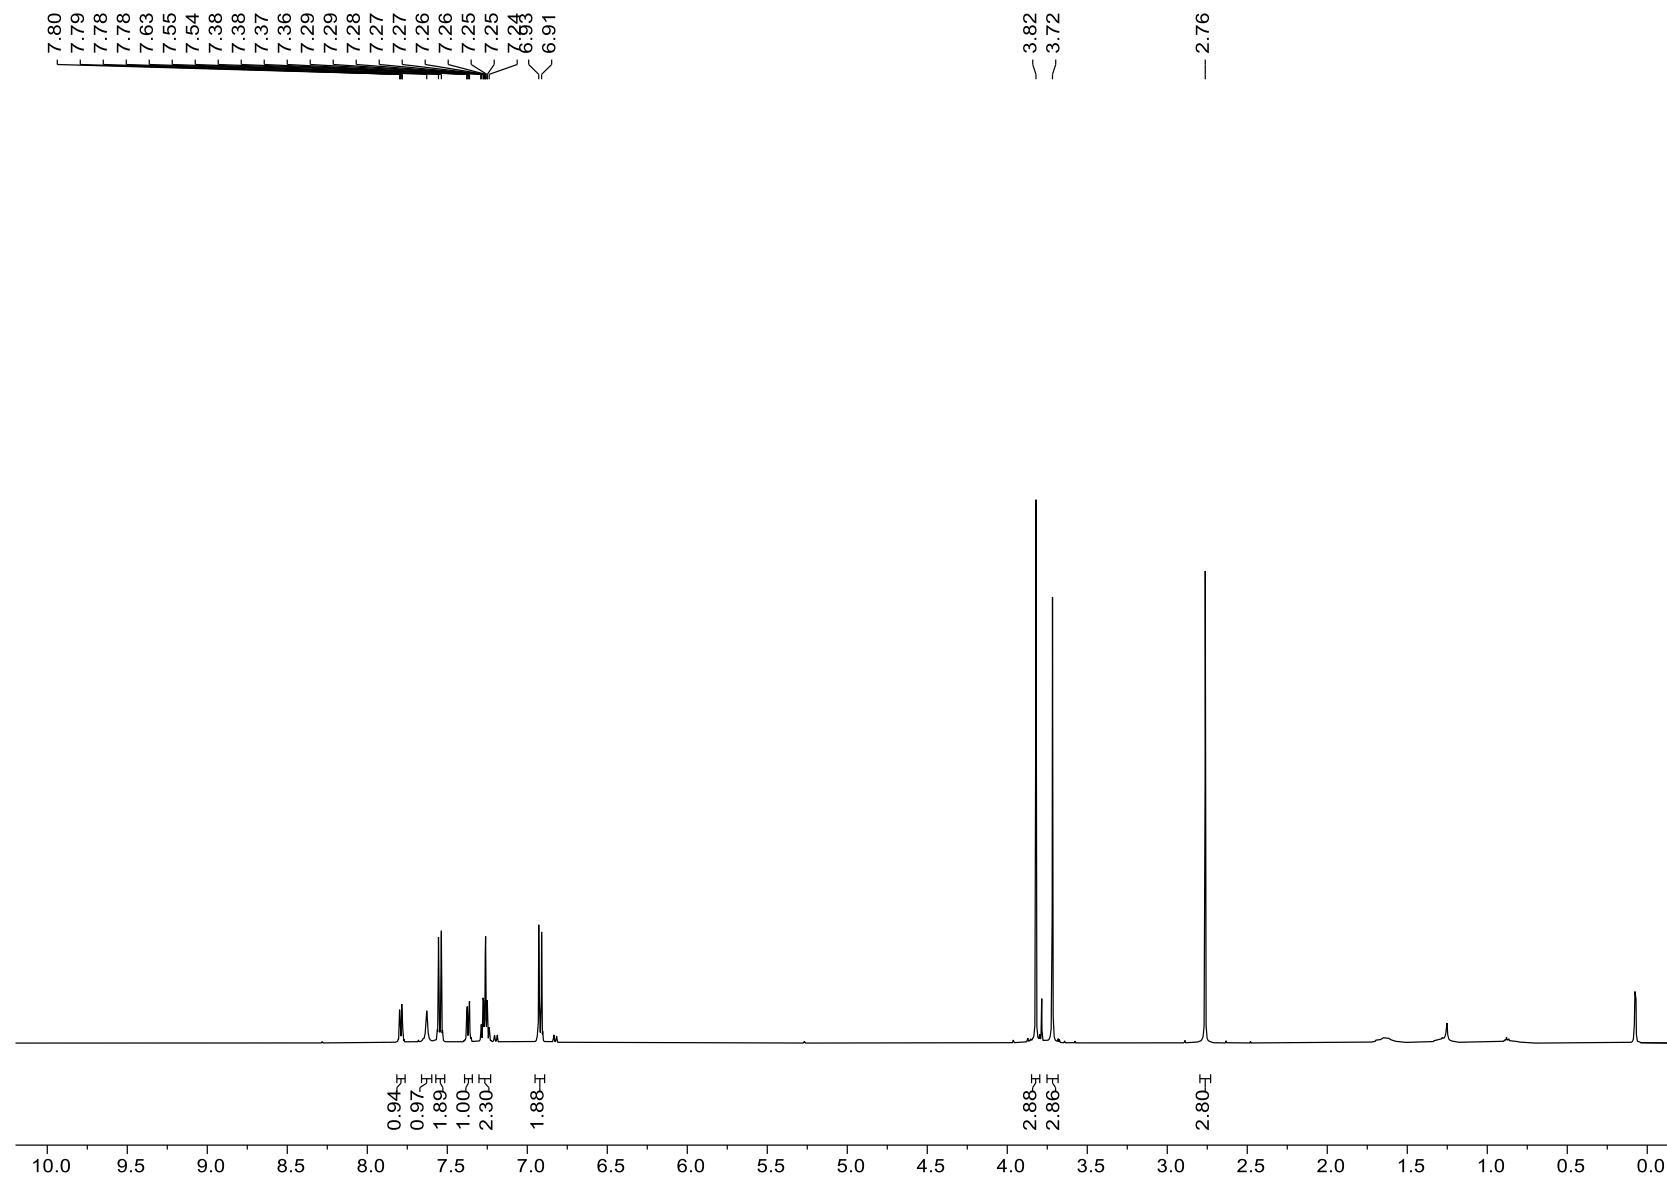

Figure S17:  $^{13}\text{C}$  NMR (126 MHz,  $\text{CDCl}_3$ , 298 K) spectrum of **1h**.

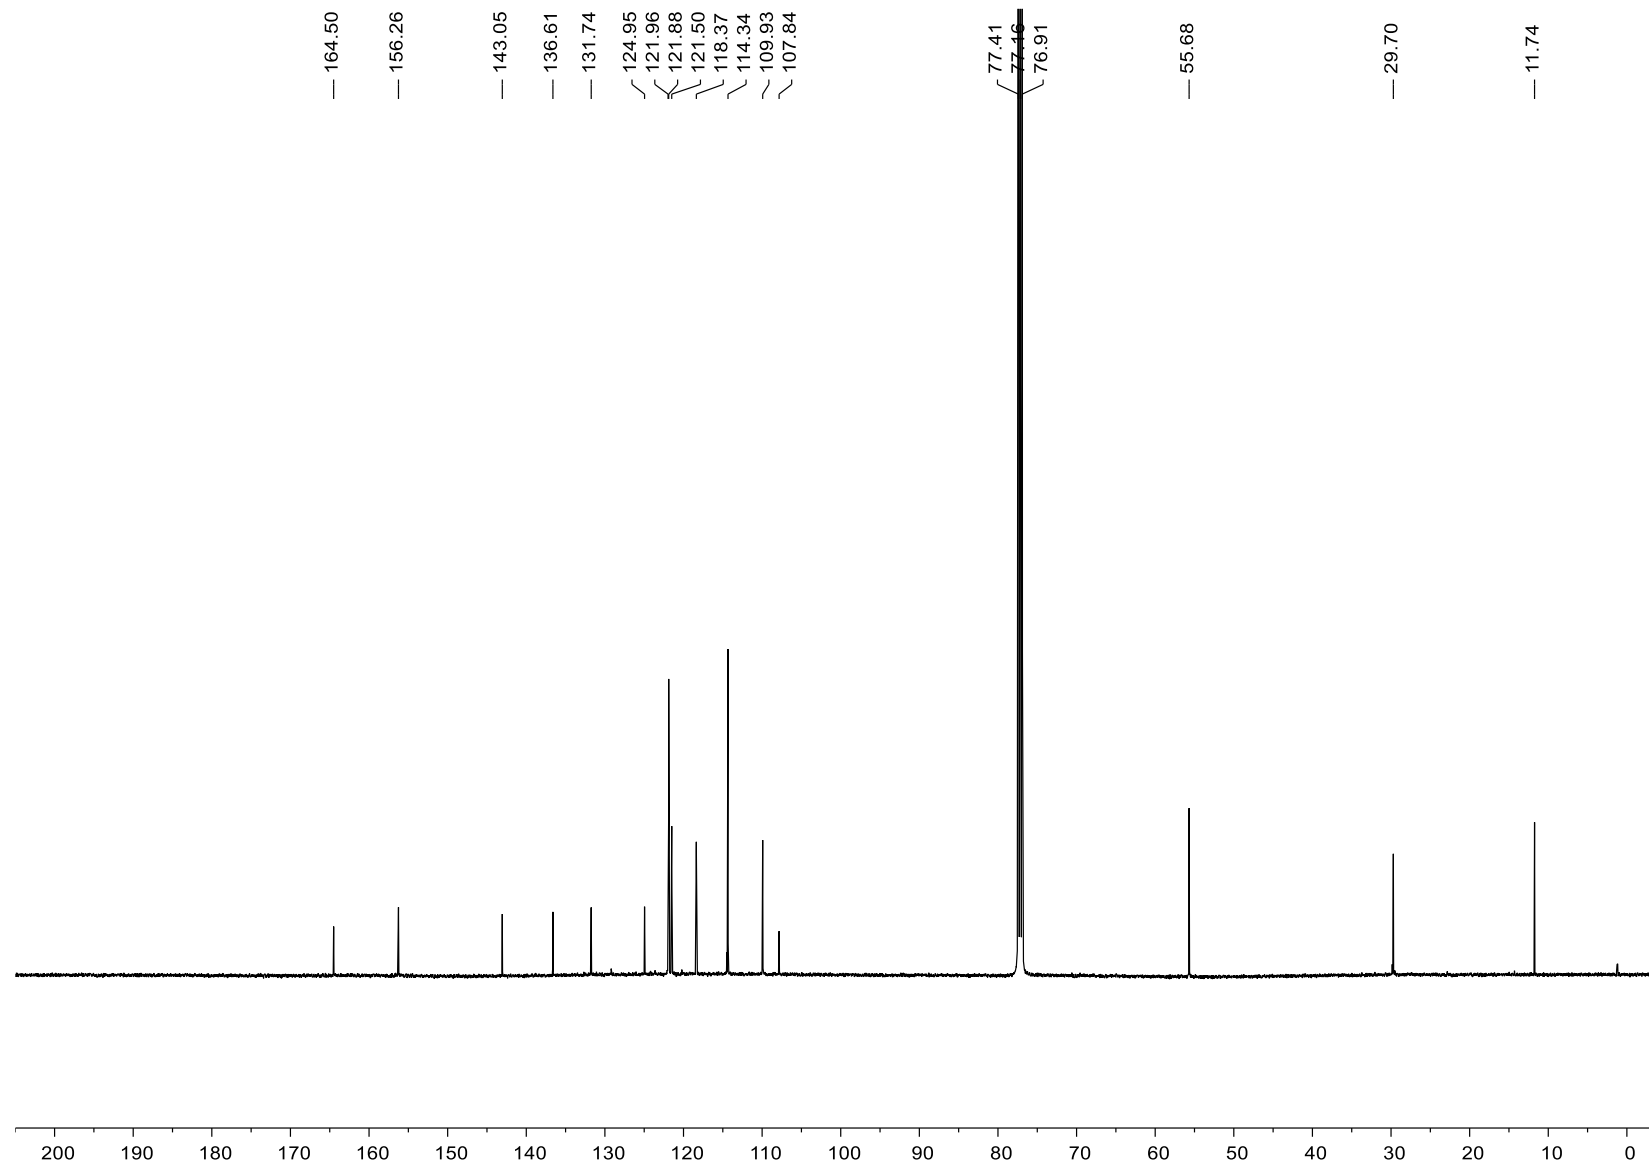

Figure S18:  $^1\text{H}$  NMR (500 MHz,  $\text{CDCl}_3$ , 298 K) spectrum of **1i**.

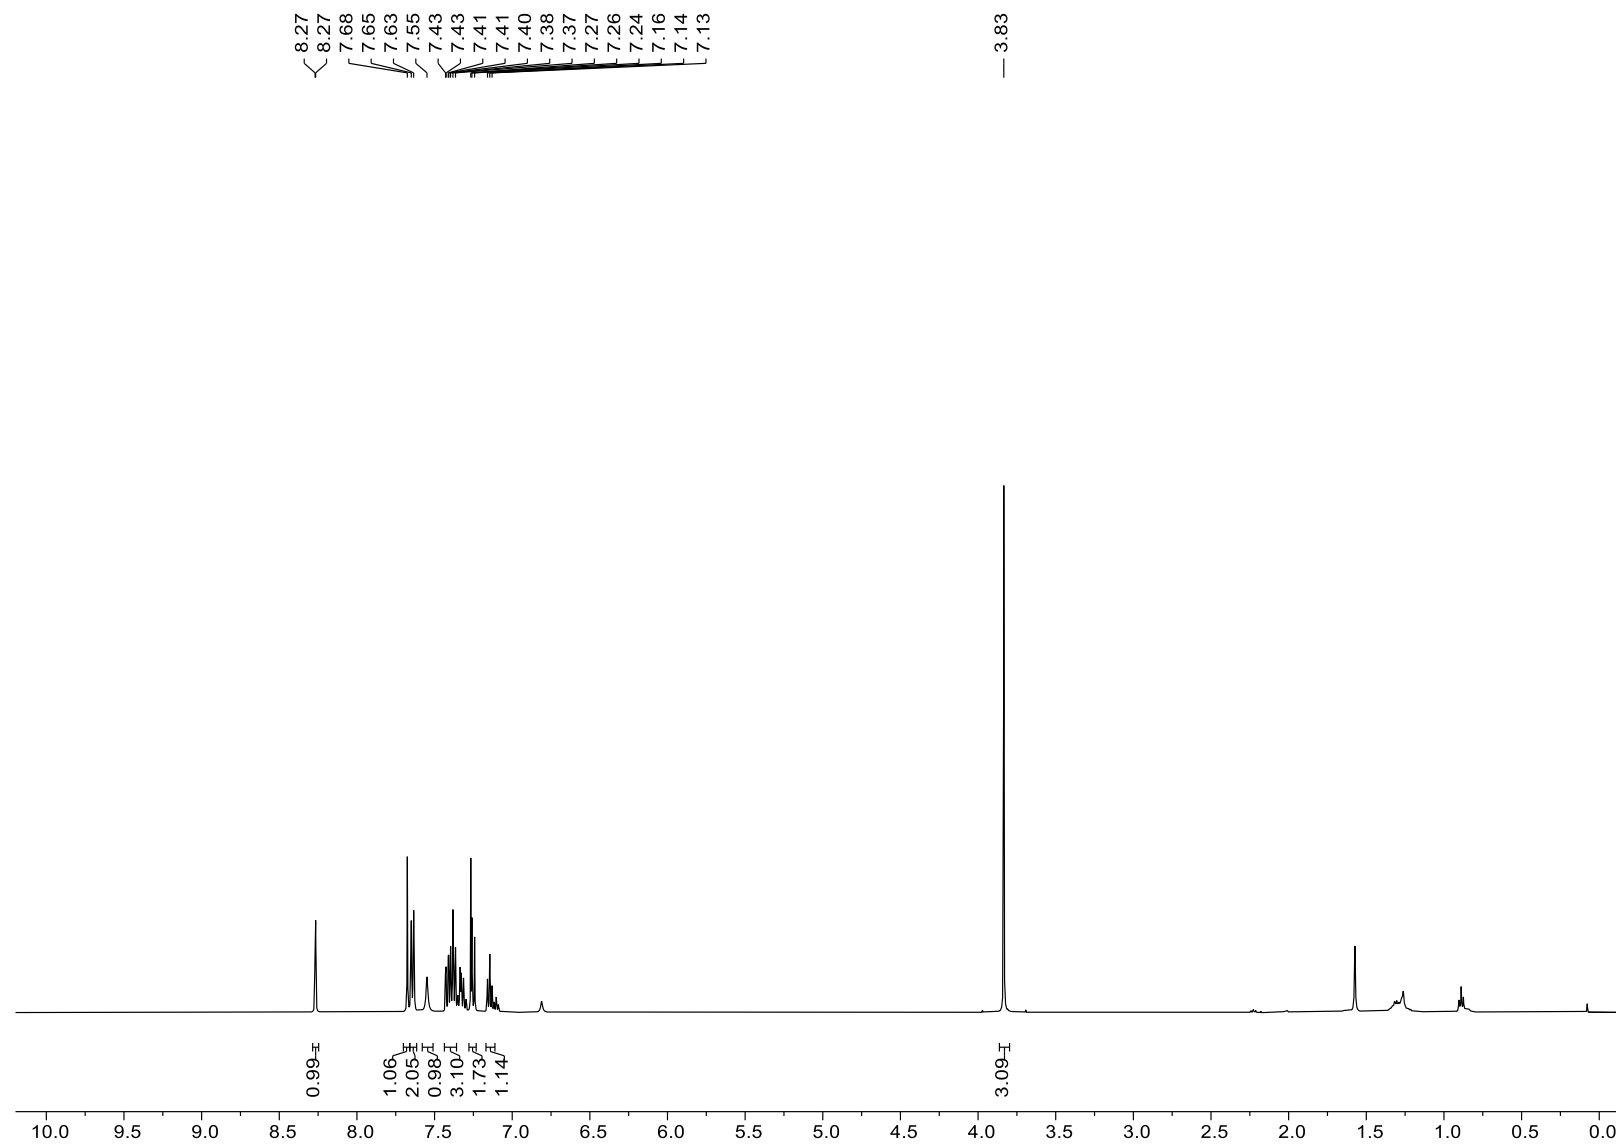

Figure S19:  $^{13}\text{C}$  NMR (126 MHz,  $\text{CDCl}_3$ , 298 K) spectrum of **1i**.

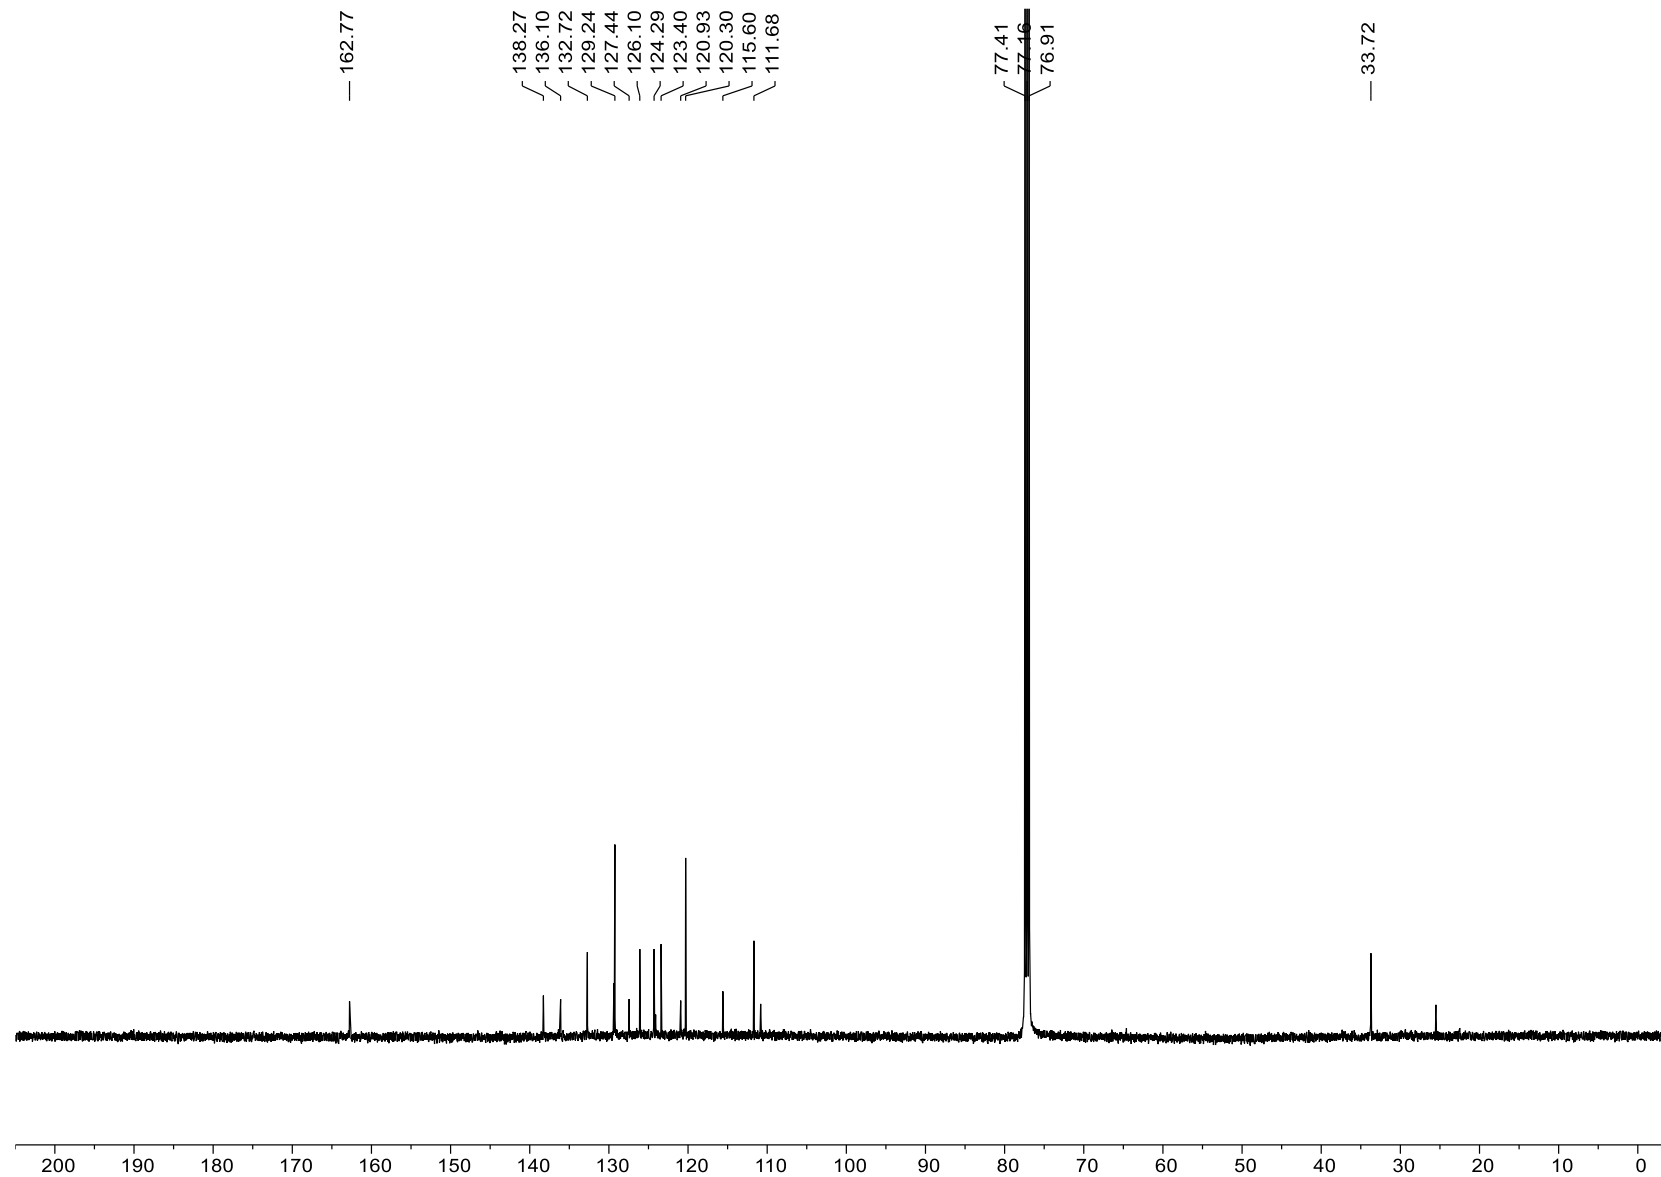



Figure S20:  $^1\text{H}$  NMR (500 MHz,  $\text{CDCl}_3$ , 298 K) spectrum of **1j**.

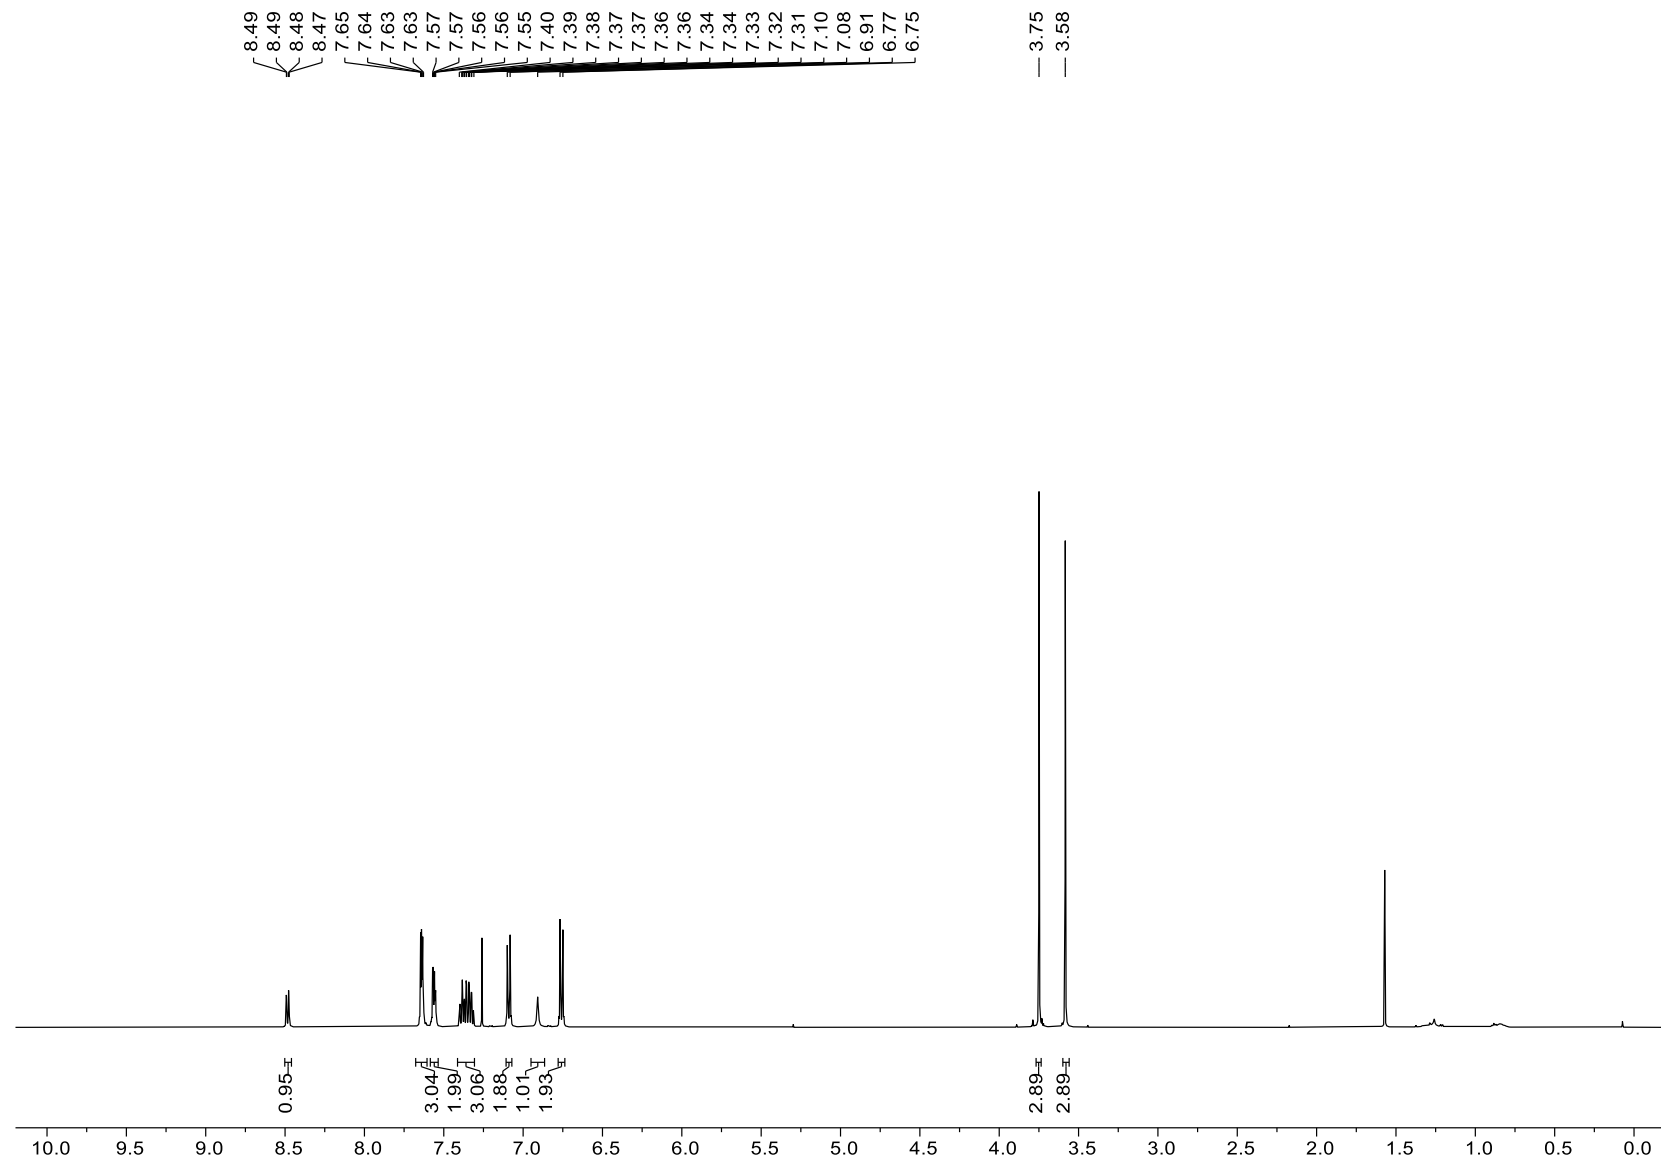

Figure S21:  $^{13}\text{C}$  NMR (126 MHz,  $\text{CDCl}_3$ , 298 K) spectrum of **1j**.

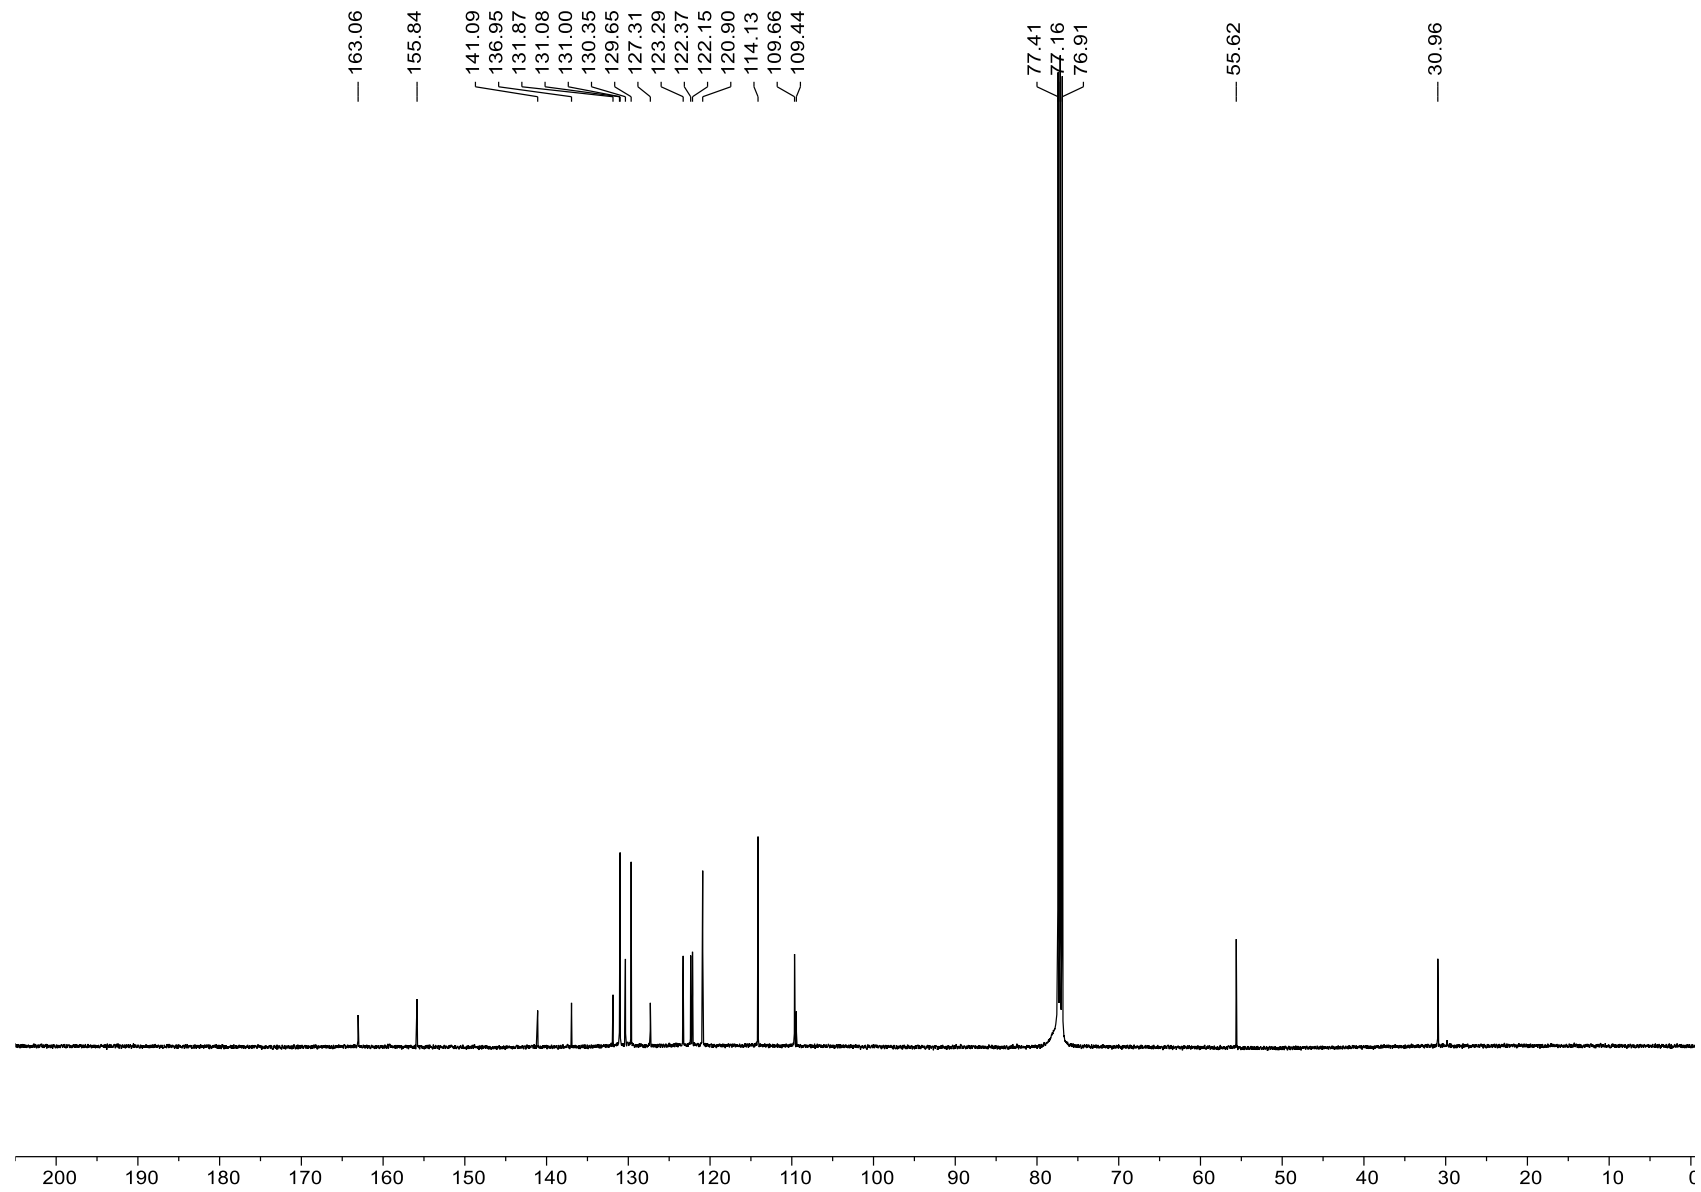

Figure S22:  $^1\text{H}$  NMR (500 MHz,  $\text{CDCl}_3$ , 298 K) spectrum of **1k**.

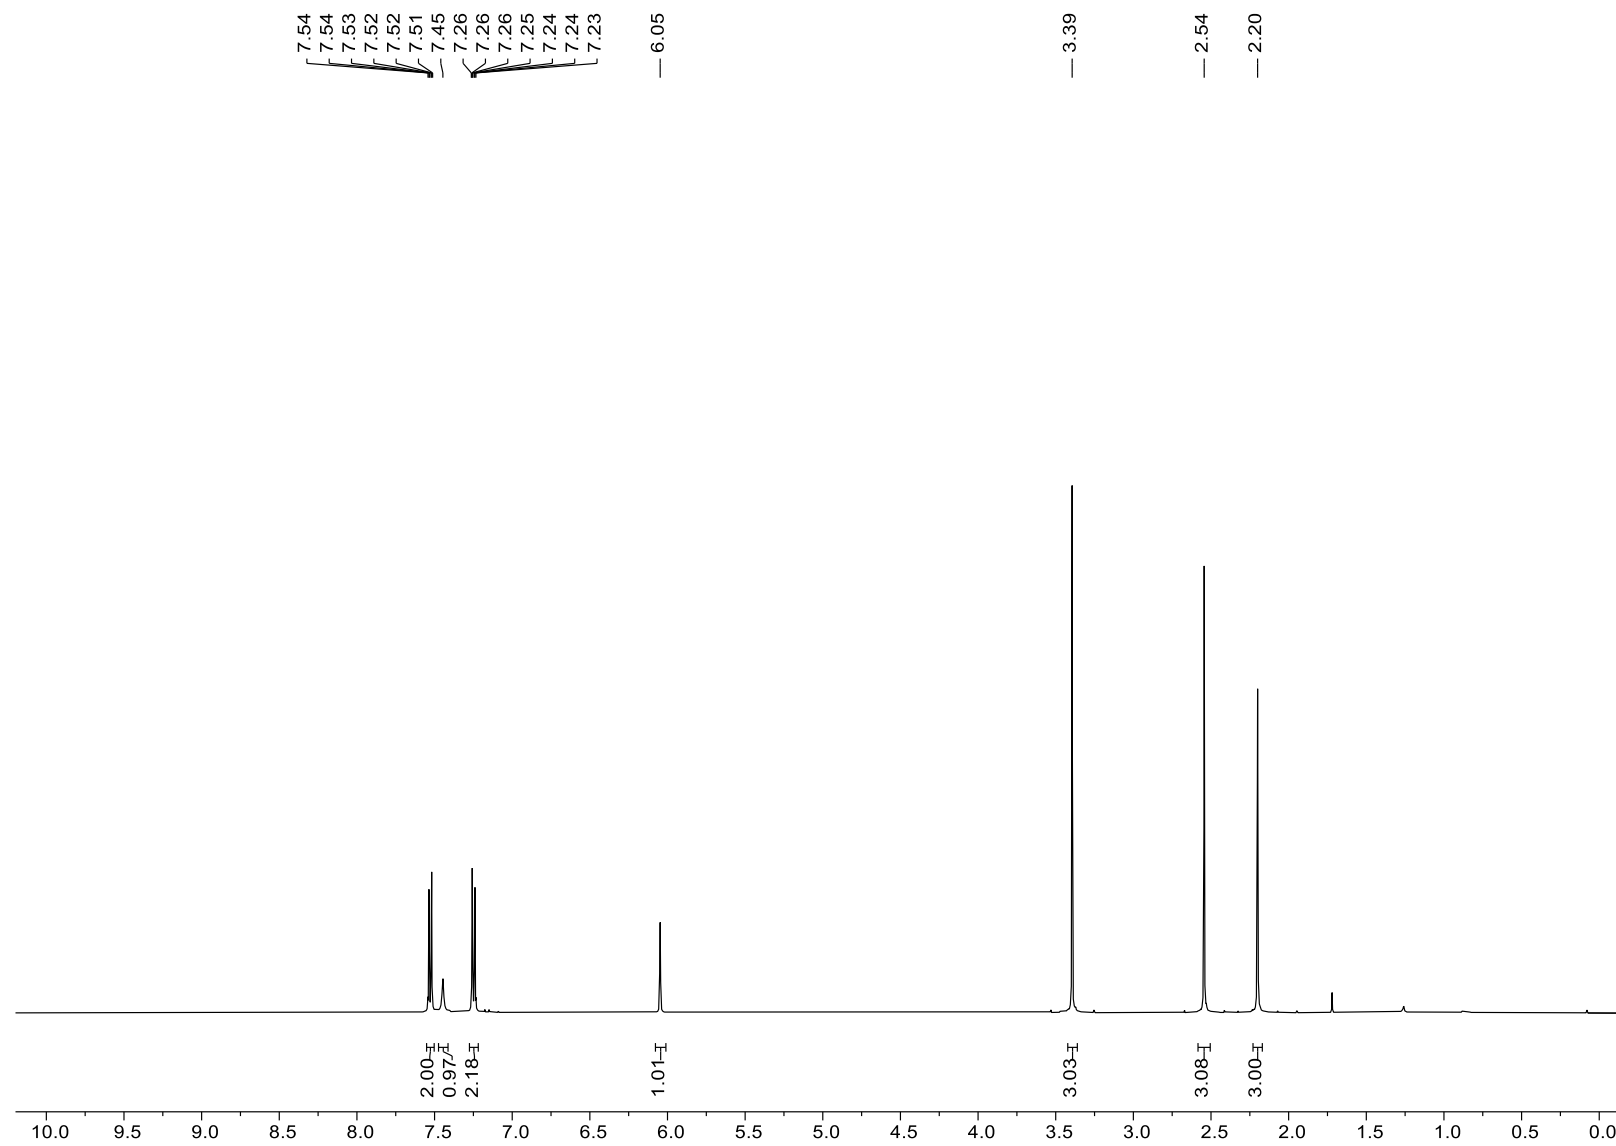

Figure S23:  $^{13}\text{C}$  NMR (126 MHz,  $\text{CDCl}_3$ , 298 K) spectrum of **1k**.

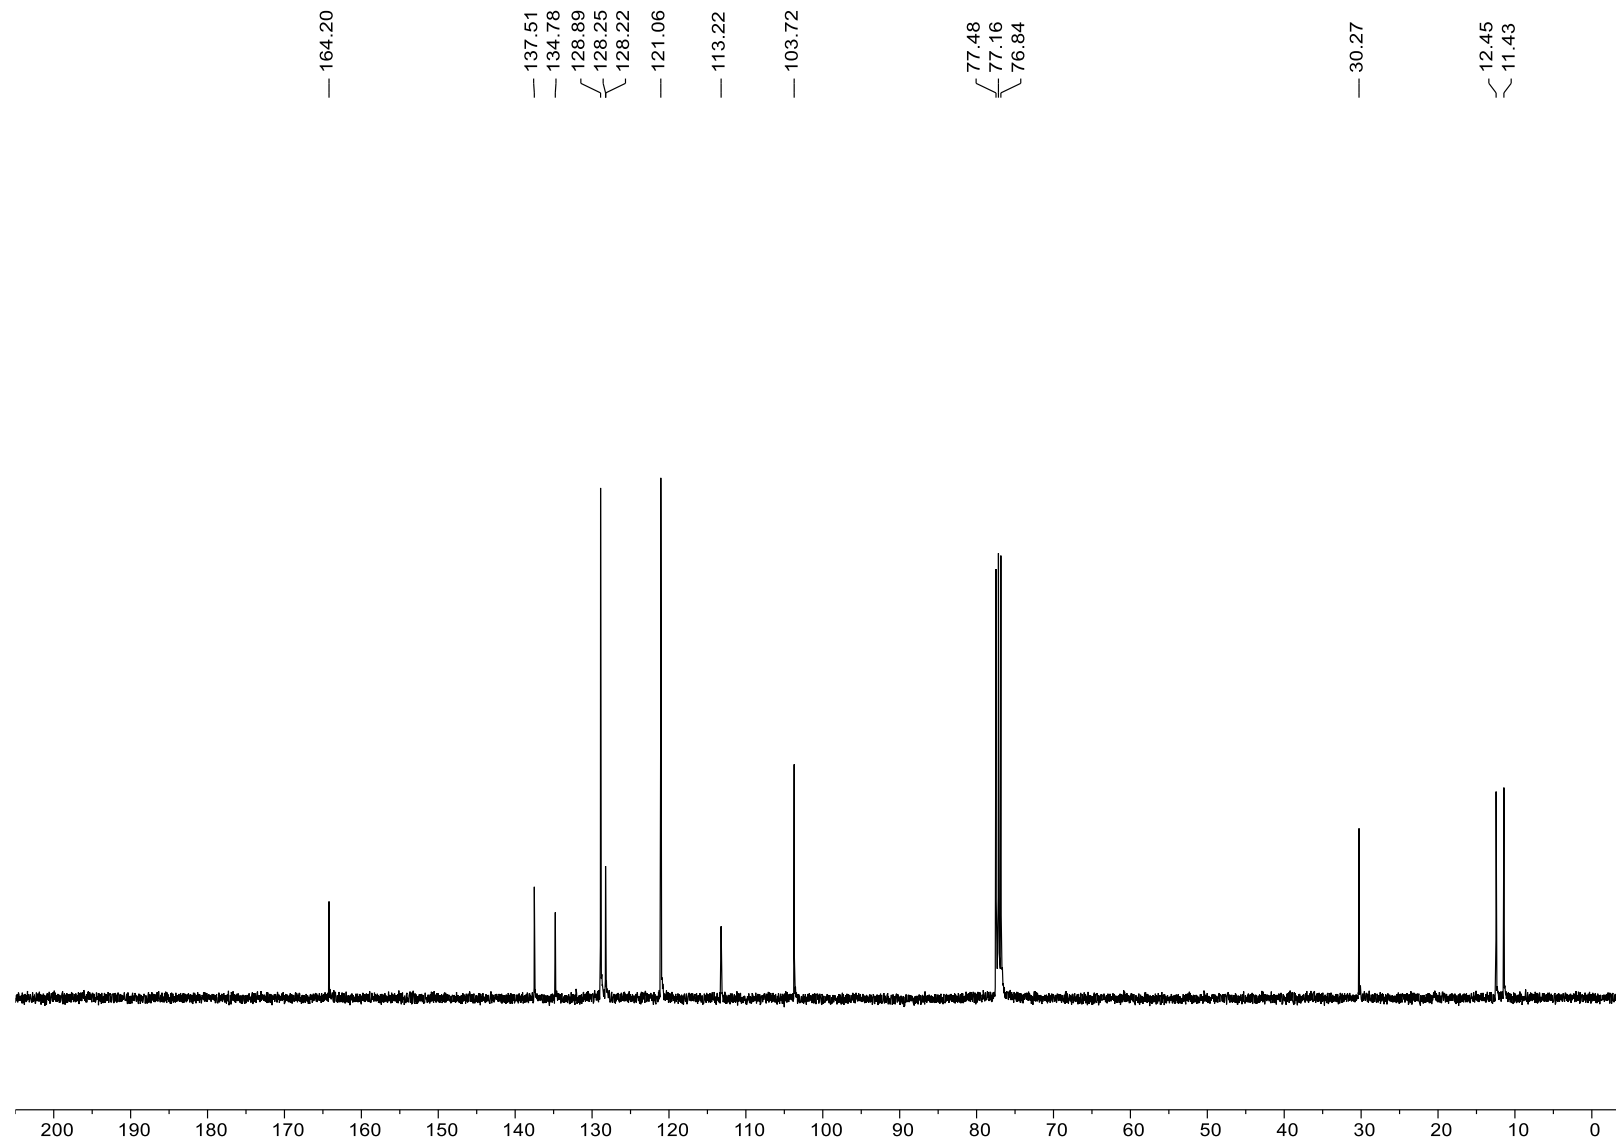

Figure S24:  $^1\text{H}$  NMR (500 MHz,  $\text{CDCl}_3$ , 298 K) spectrum of **11**.

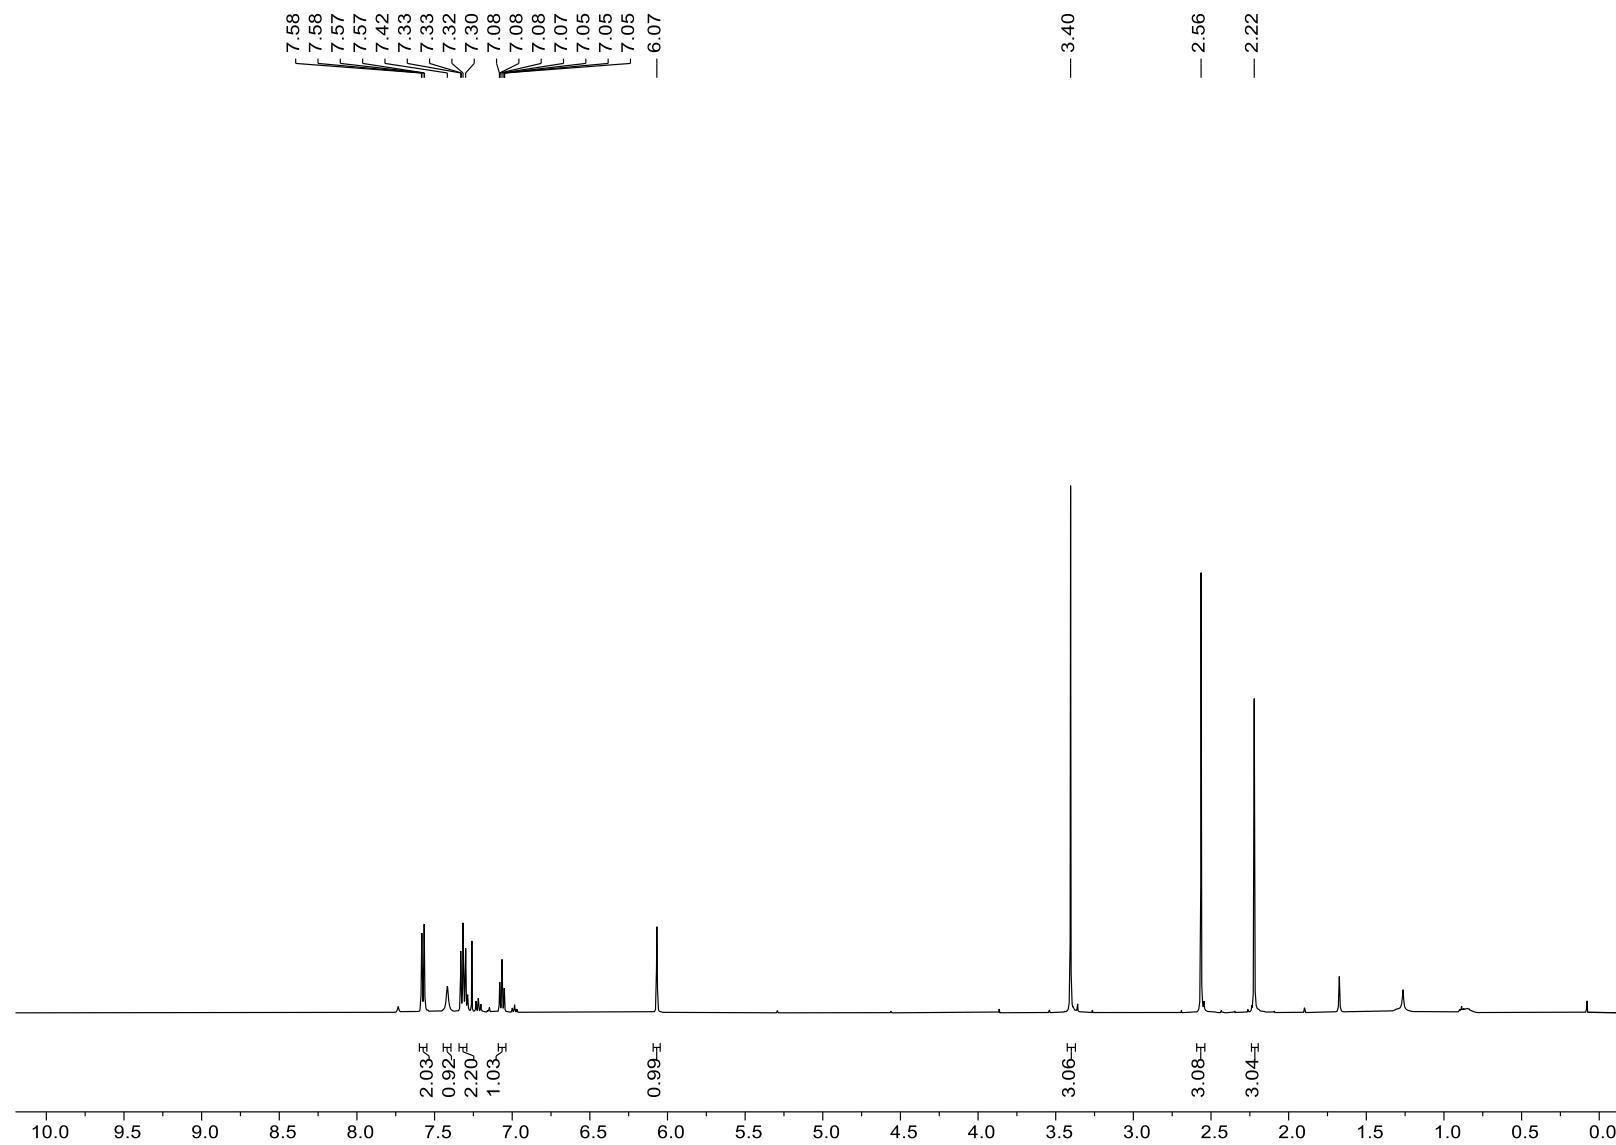

Figure S25:  $^{13}\text{C}$  NMR (126 MHz,  $\text{CDCl}_3$ , 298 K) spectrum of **11**.

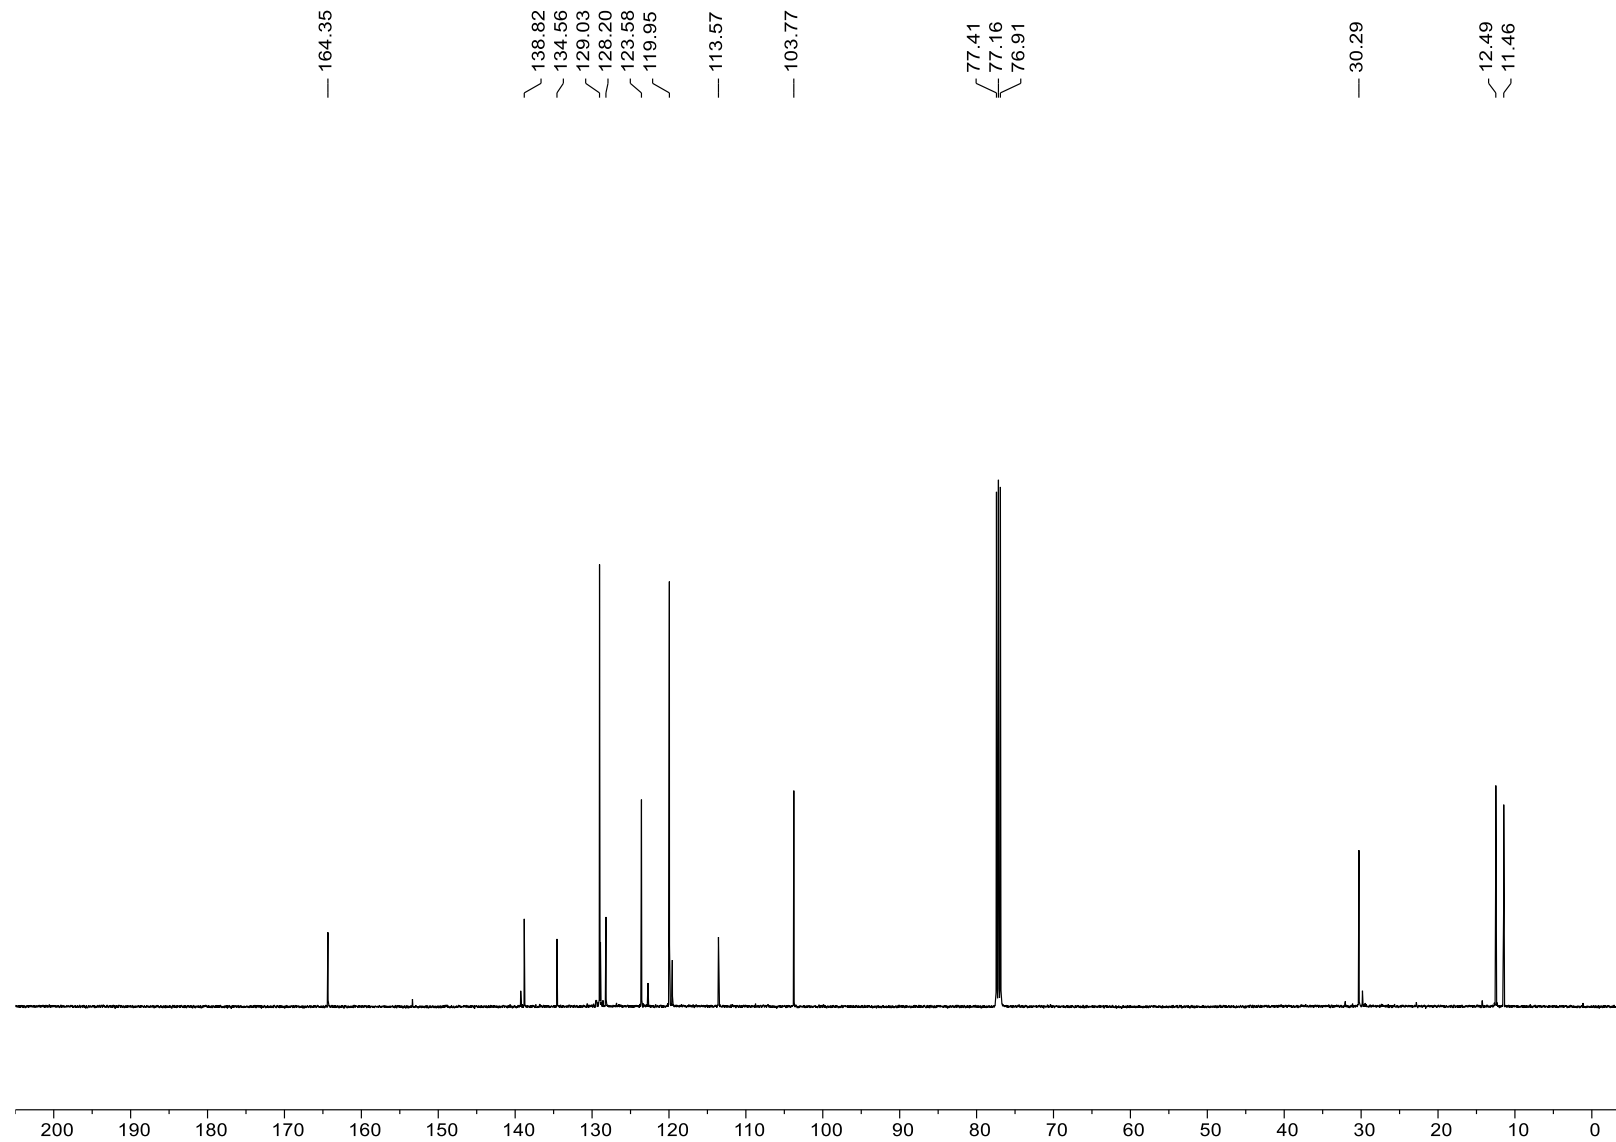

Figure S26:  $^1\text{H}$  NMR (500 MHz,  $\text{CDCl}_3$ , 298 K) spectrum of **1m**.

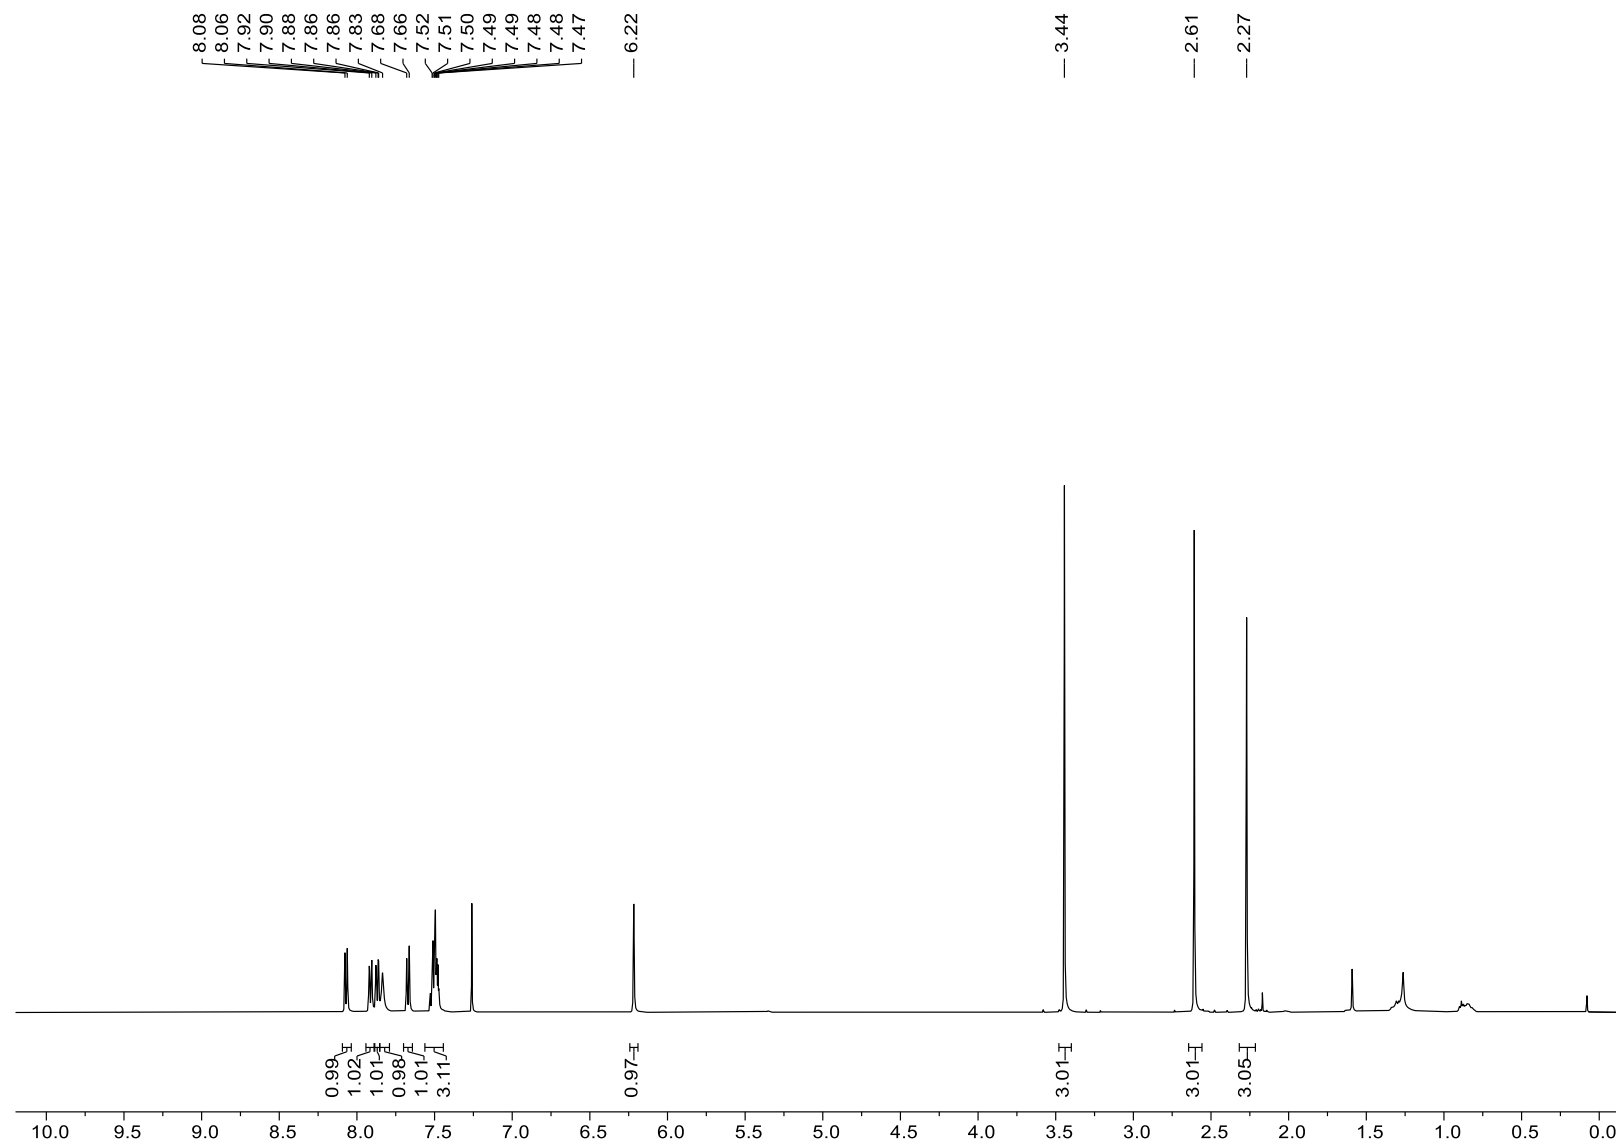

Figure S27:  $^{13}\text{C}$  NMR (126 MHz,  $\text{CDCl}_3$ , 298 K) spectrum of **1m**.

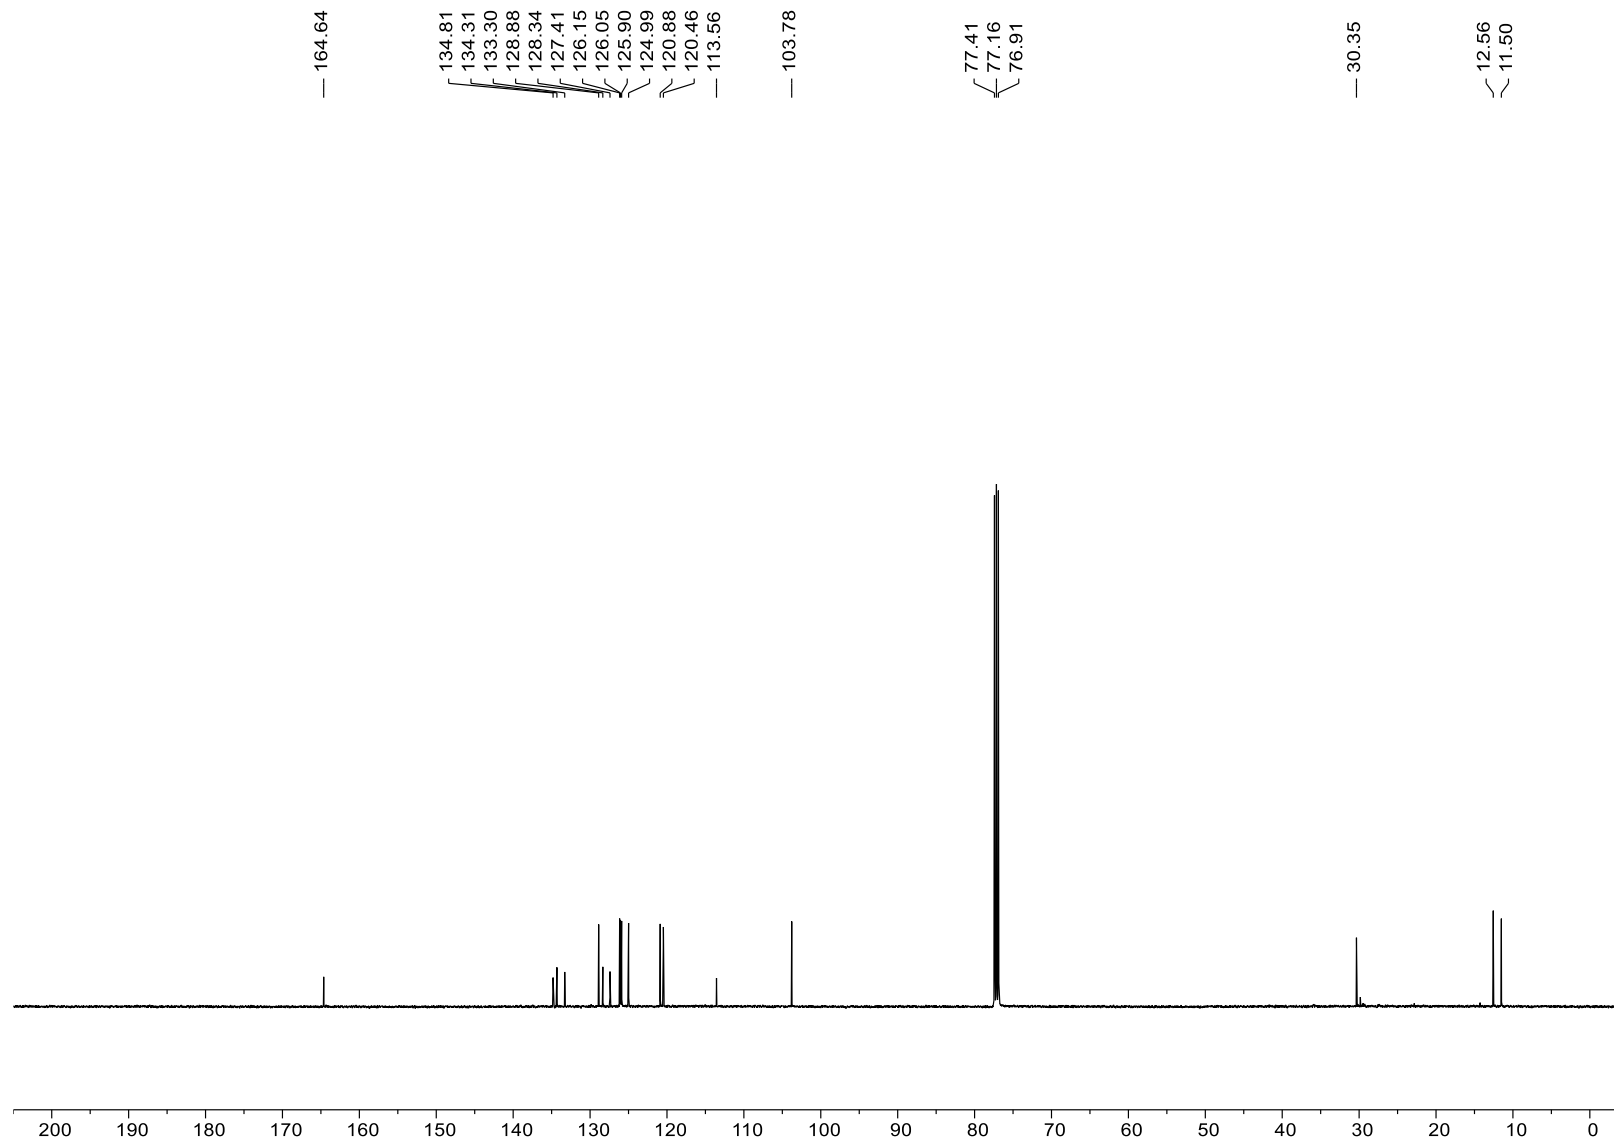



Figure S28:  $^1\text{H}$  NMR (500 MHz,  $\text{CDCl}_3$ , 298 K) spectrum of **1n**.

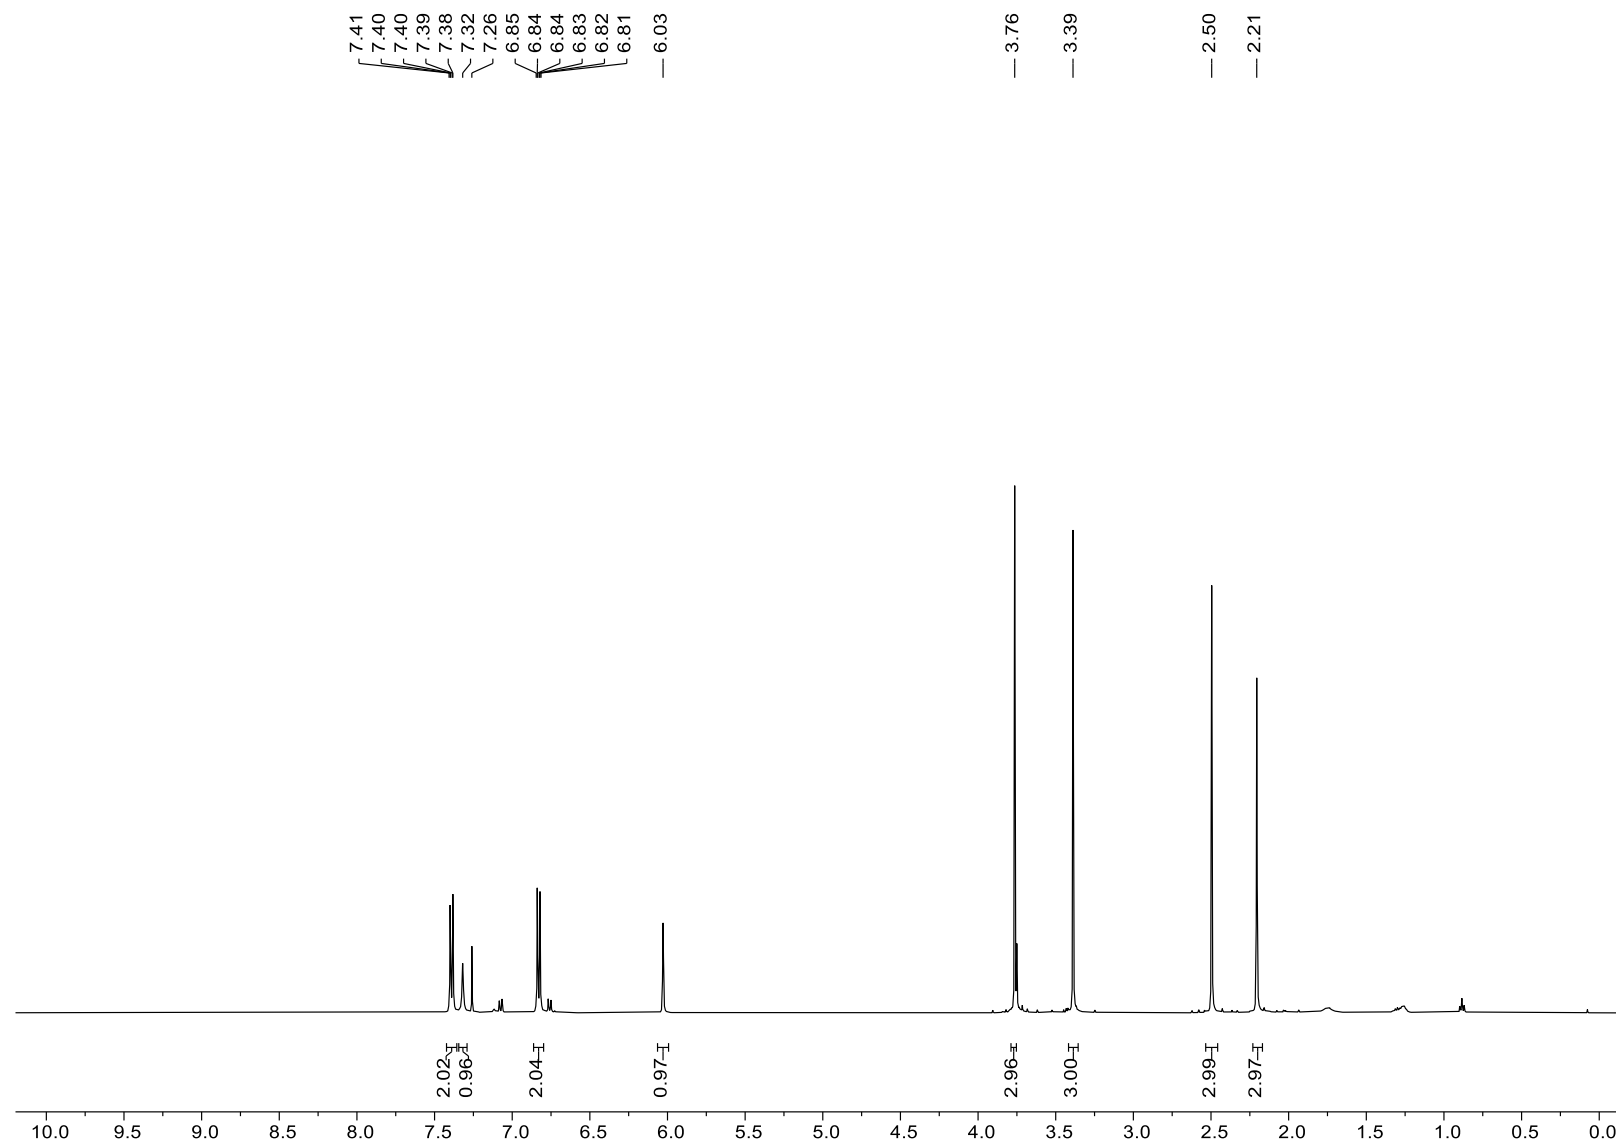

Figure S29:  $^{13}\text{C}$  NMR (126 MHz,  $\text{CDCl}_3$ , 298 K) spectrum of **1n**.

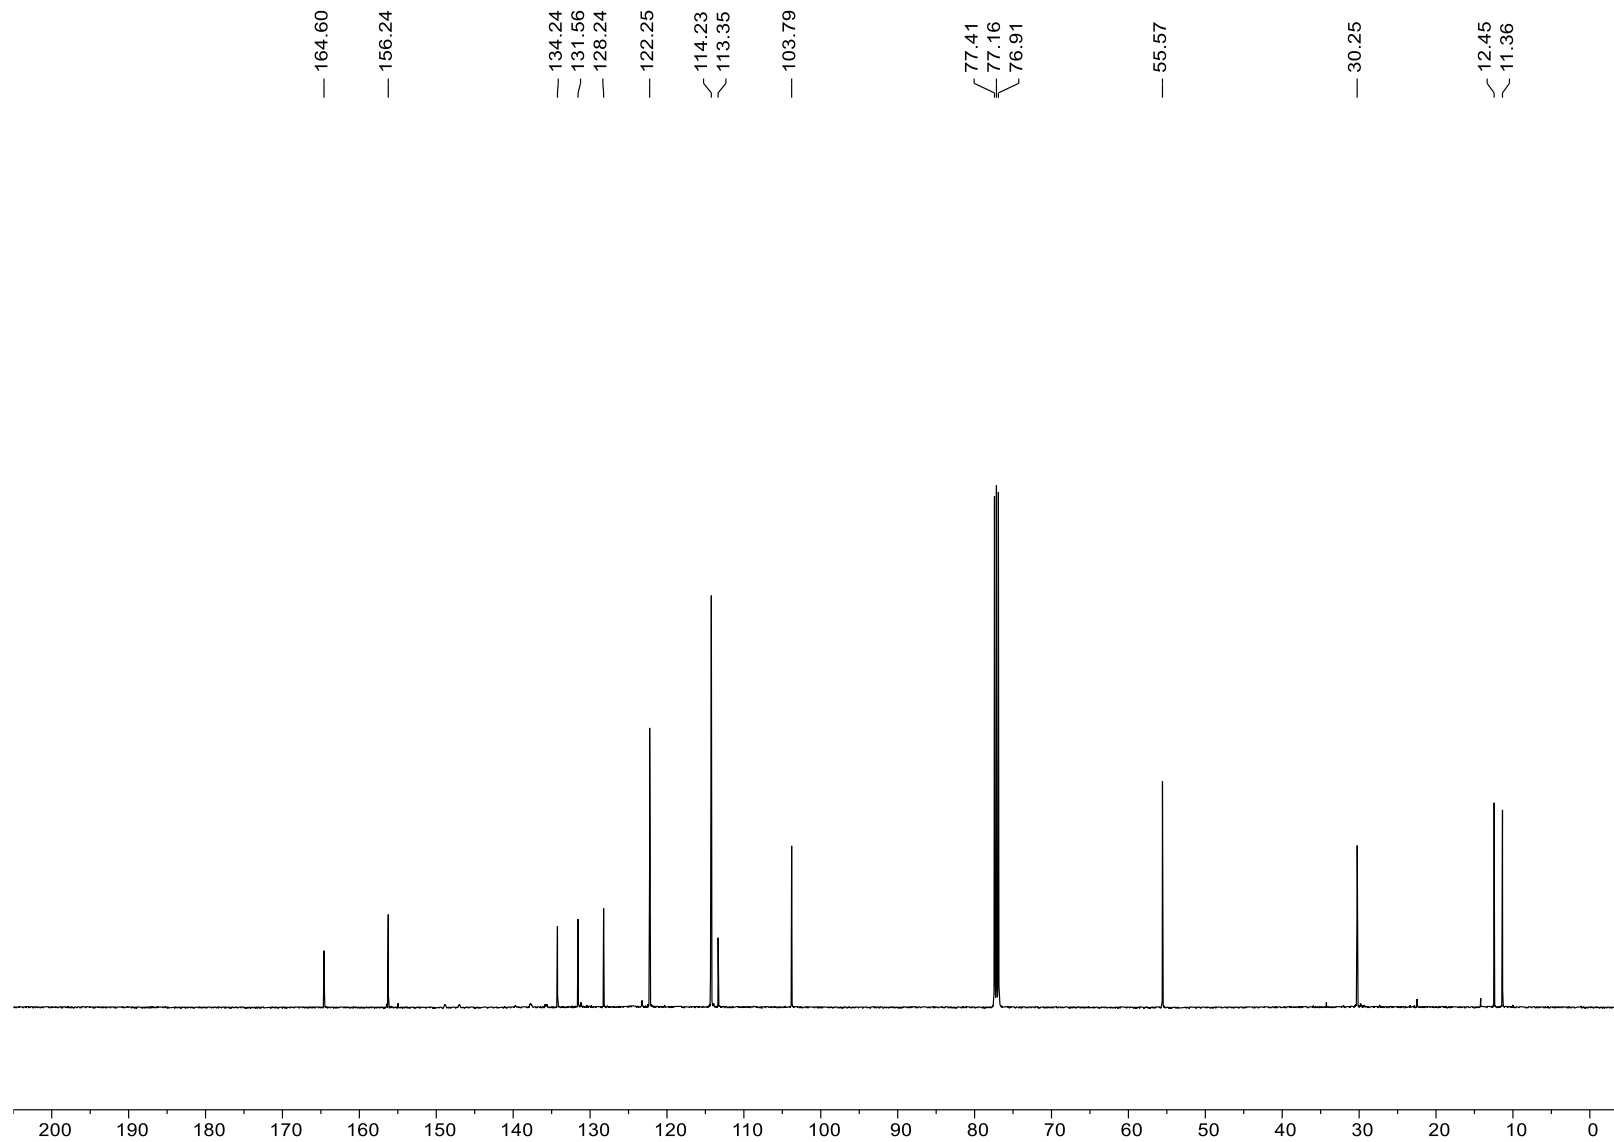

Figure S30:  $^1\text{H}$  NMR (500 MHz,  $\text{CDCl}_3$ , 298 K) spectrum of **1o'**.

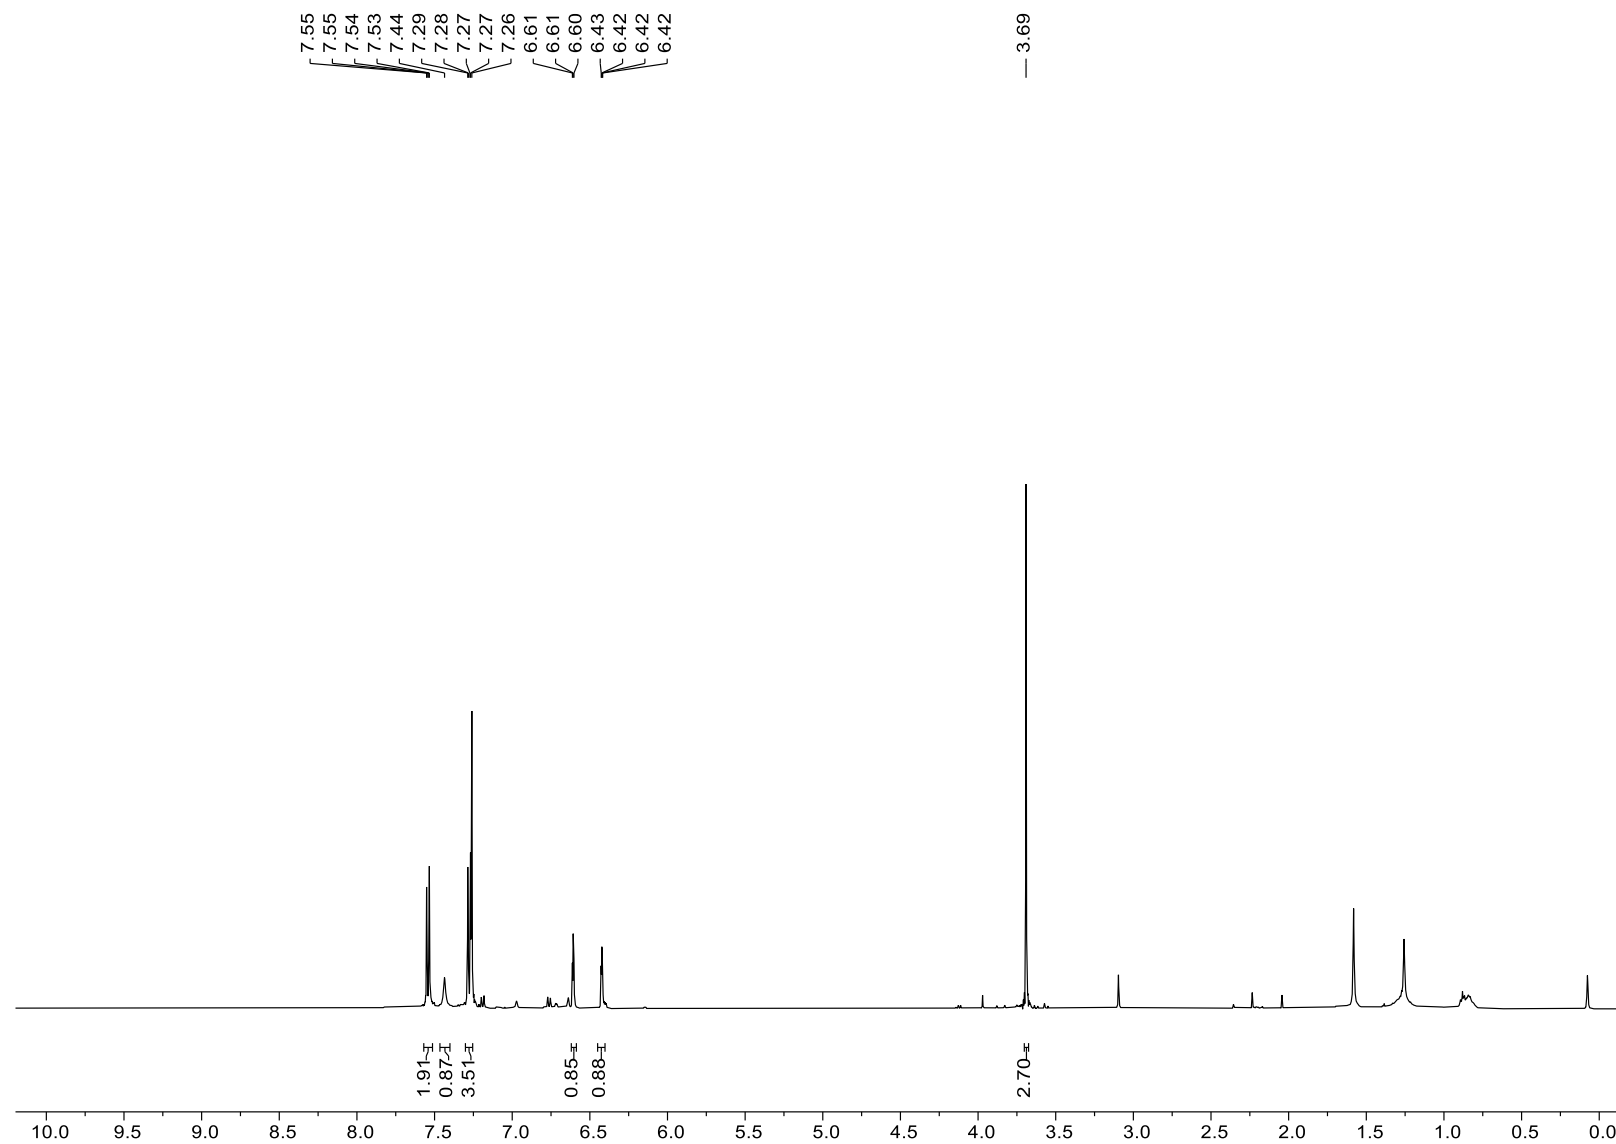

Figure S31:  $^{13}\text{C}$  NMR (126 MHz,  $\text{CDCl}_3$ , 298 K) spectrum of **1o'**.

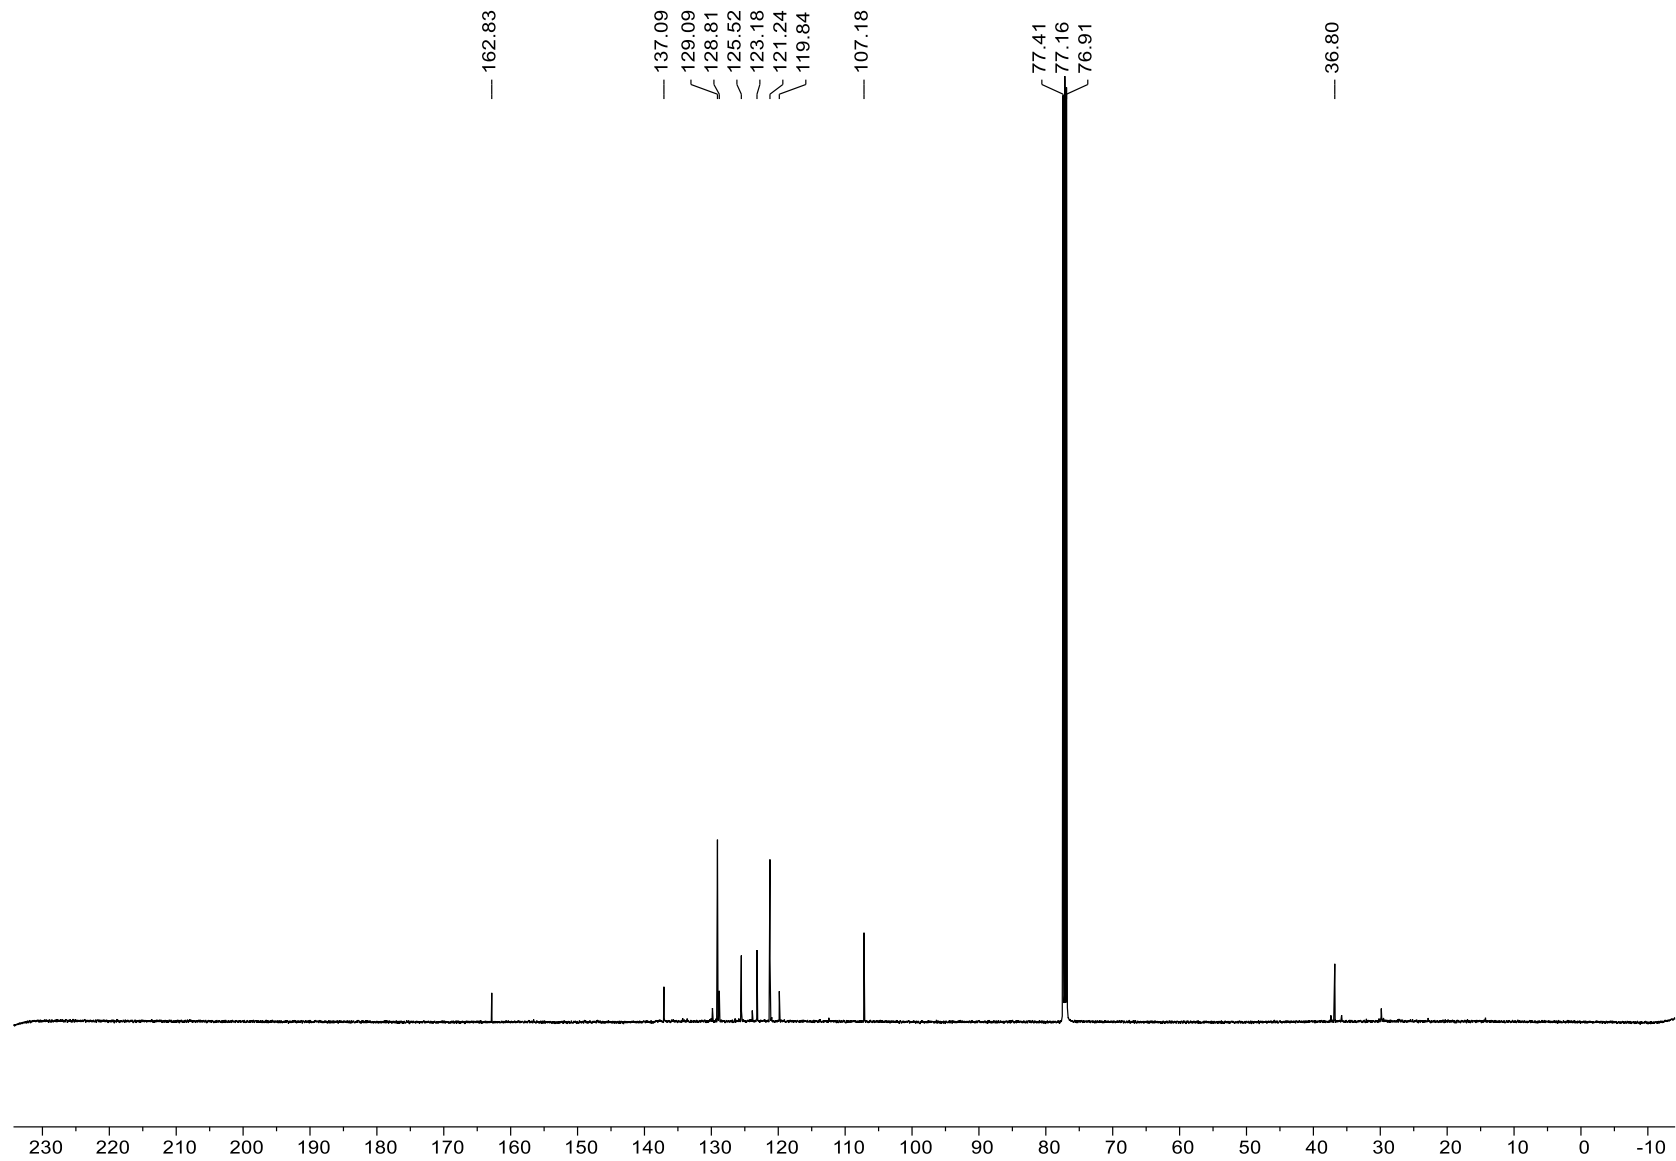

Figure S32:  $^1\text{H}$  NMR (500 MHz,  $\text{CDCl}_3$ , 298 K) spectrum of **1o**.

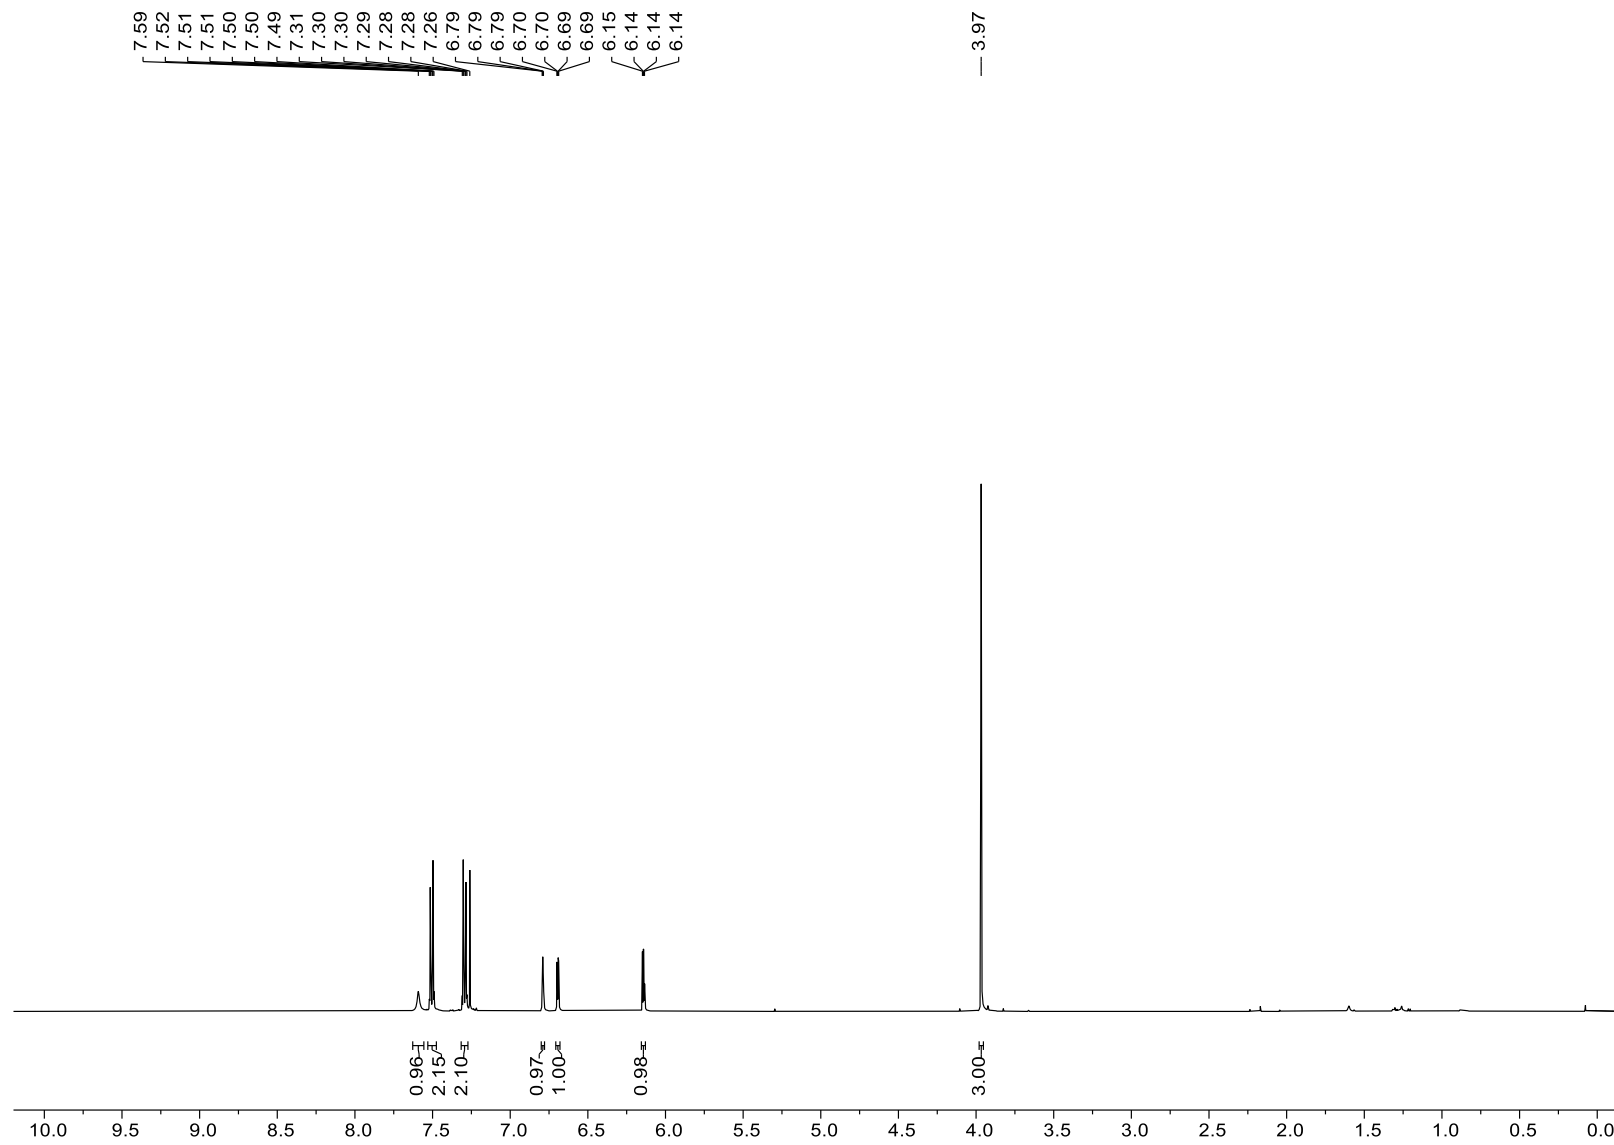

Figure S33:  $^{13}\text{C}$  NMR (126 MHz,  $\text{CDCl}_3$ , 298 K) spectrum of **1o**.

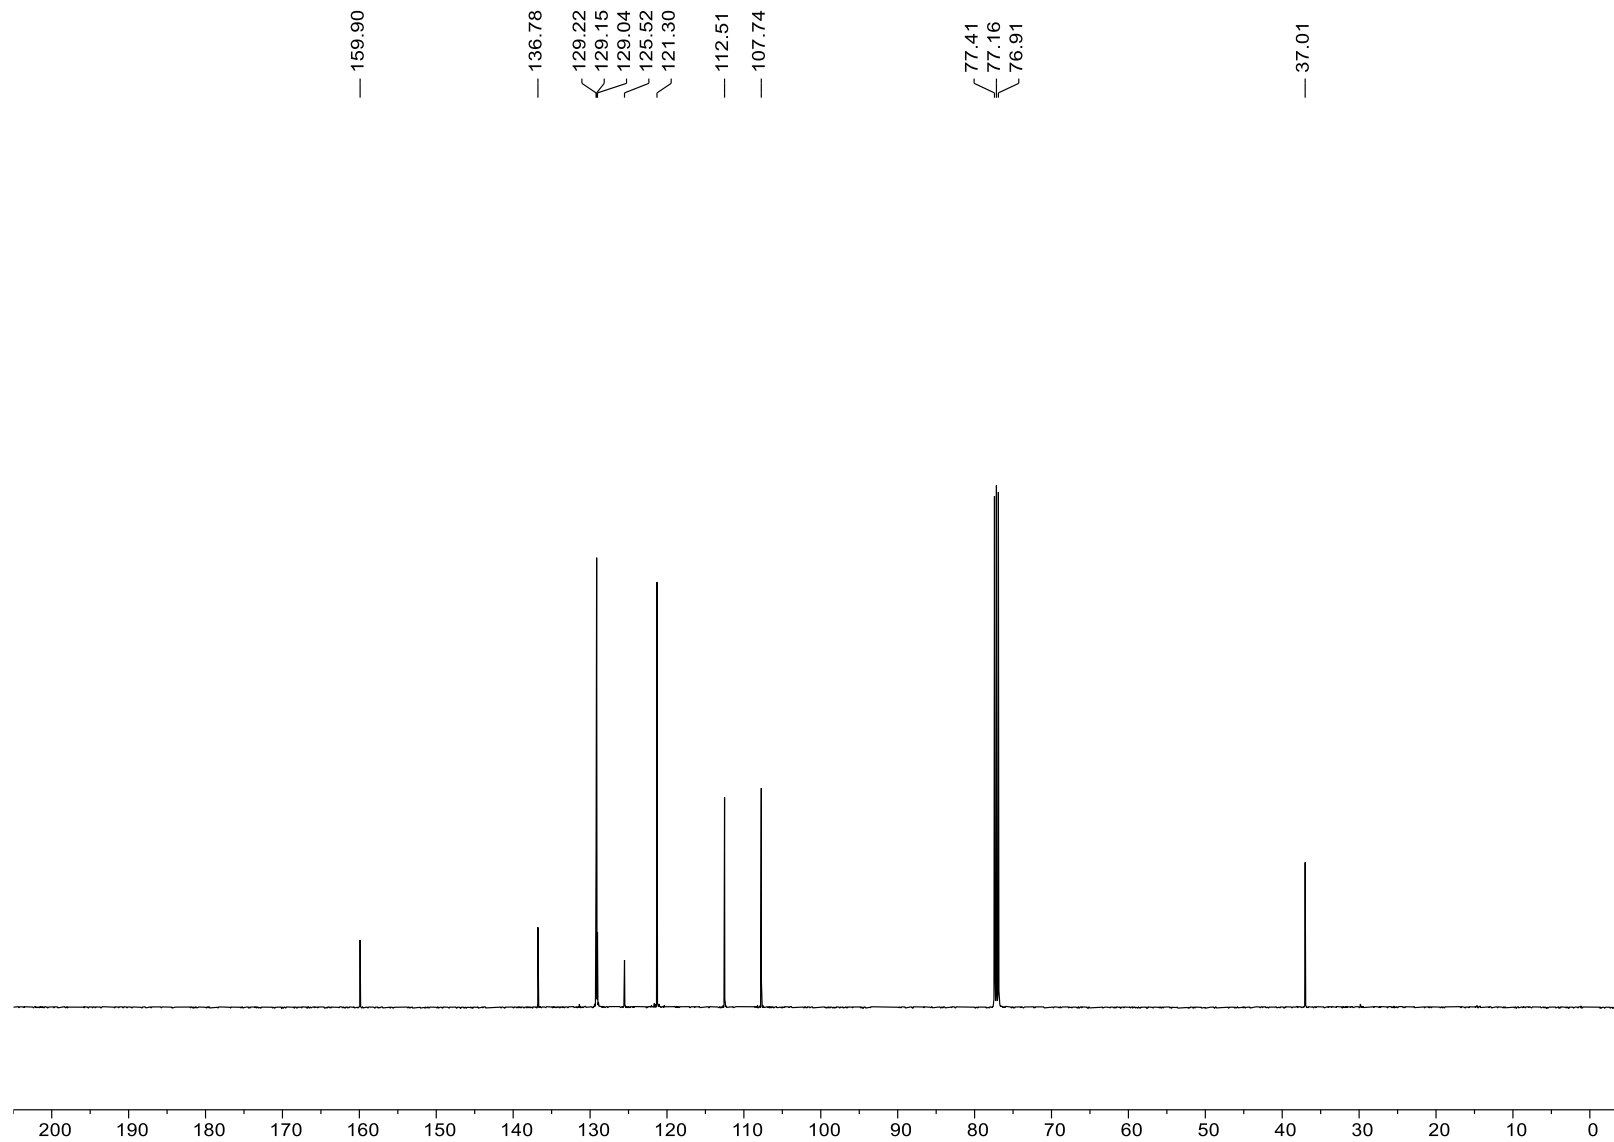

Figure S34:  $^1\text{H}$  NMR (500 MHz,  $\text{CDCl}_3$ , 298 K) spectrum of **1p'**.

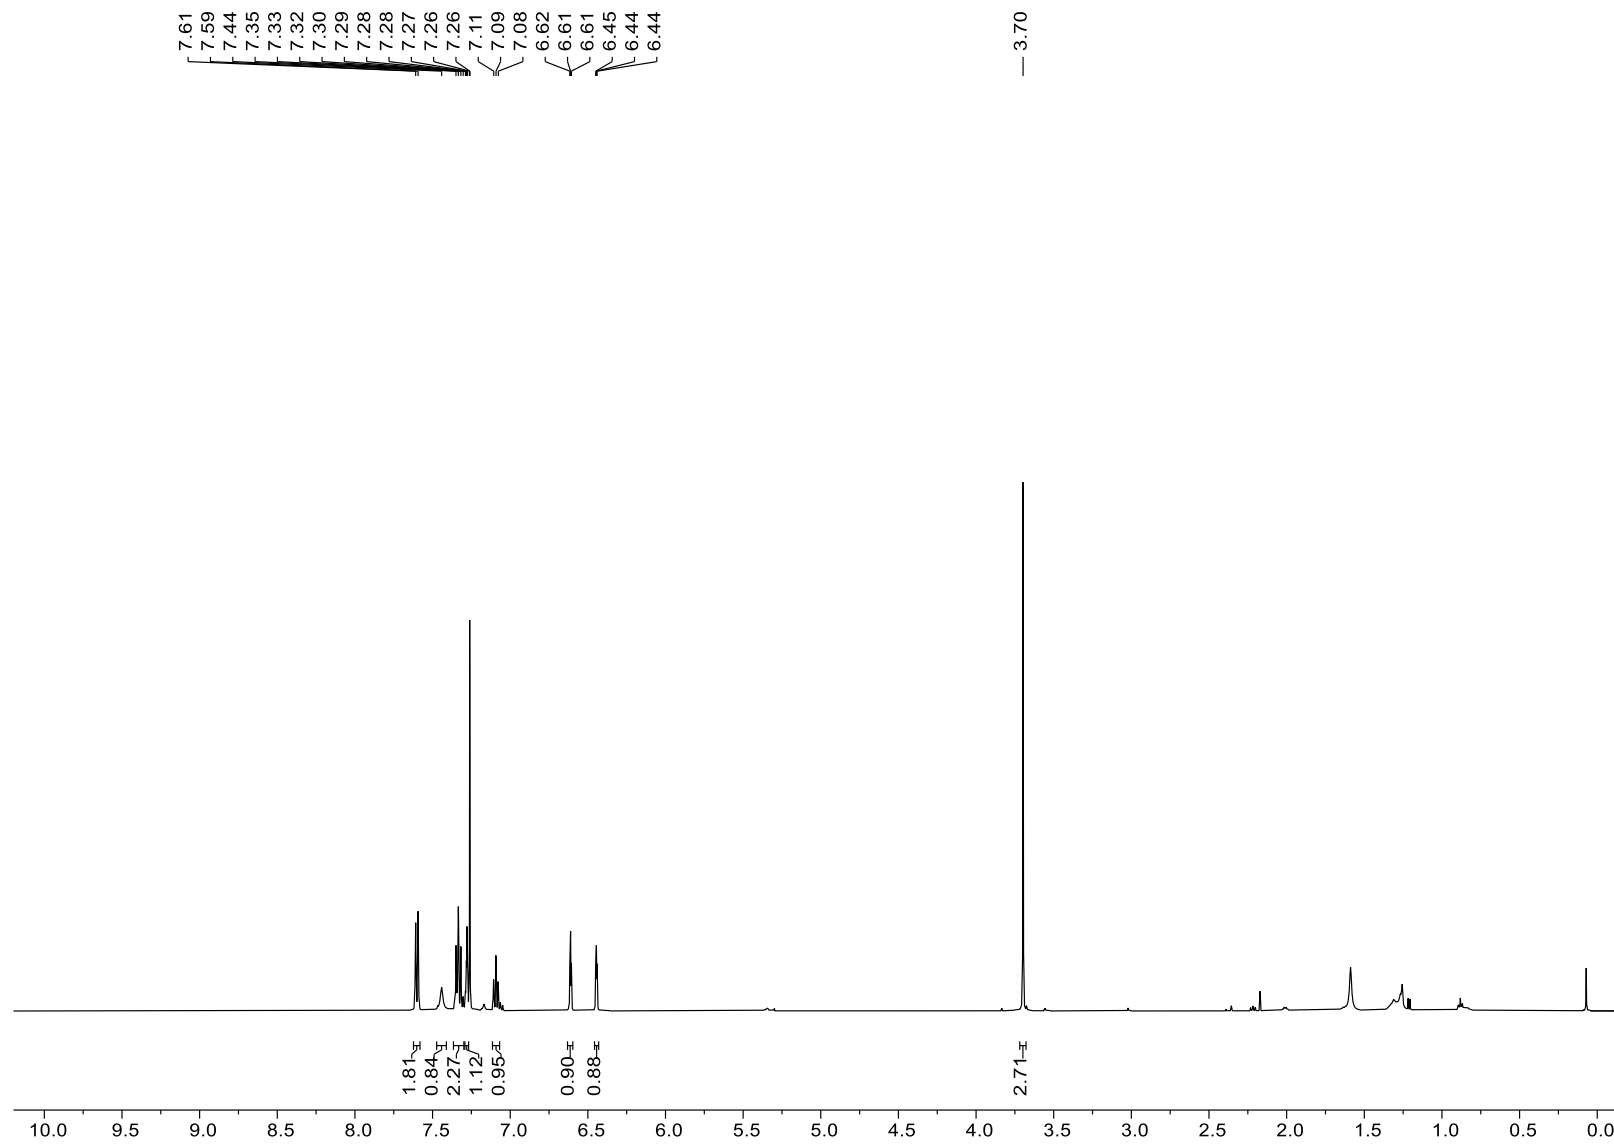

Figure S35:  $^{13}\text{C}$  NMR (126 MHz,  $\text{CDCl}_3$ , 298 K) spectrum of **1p'**.

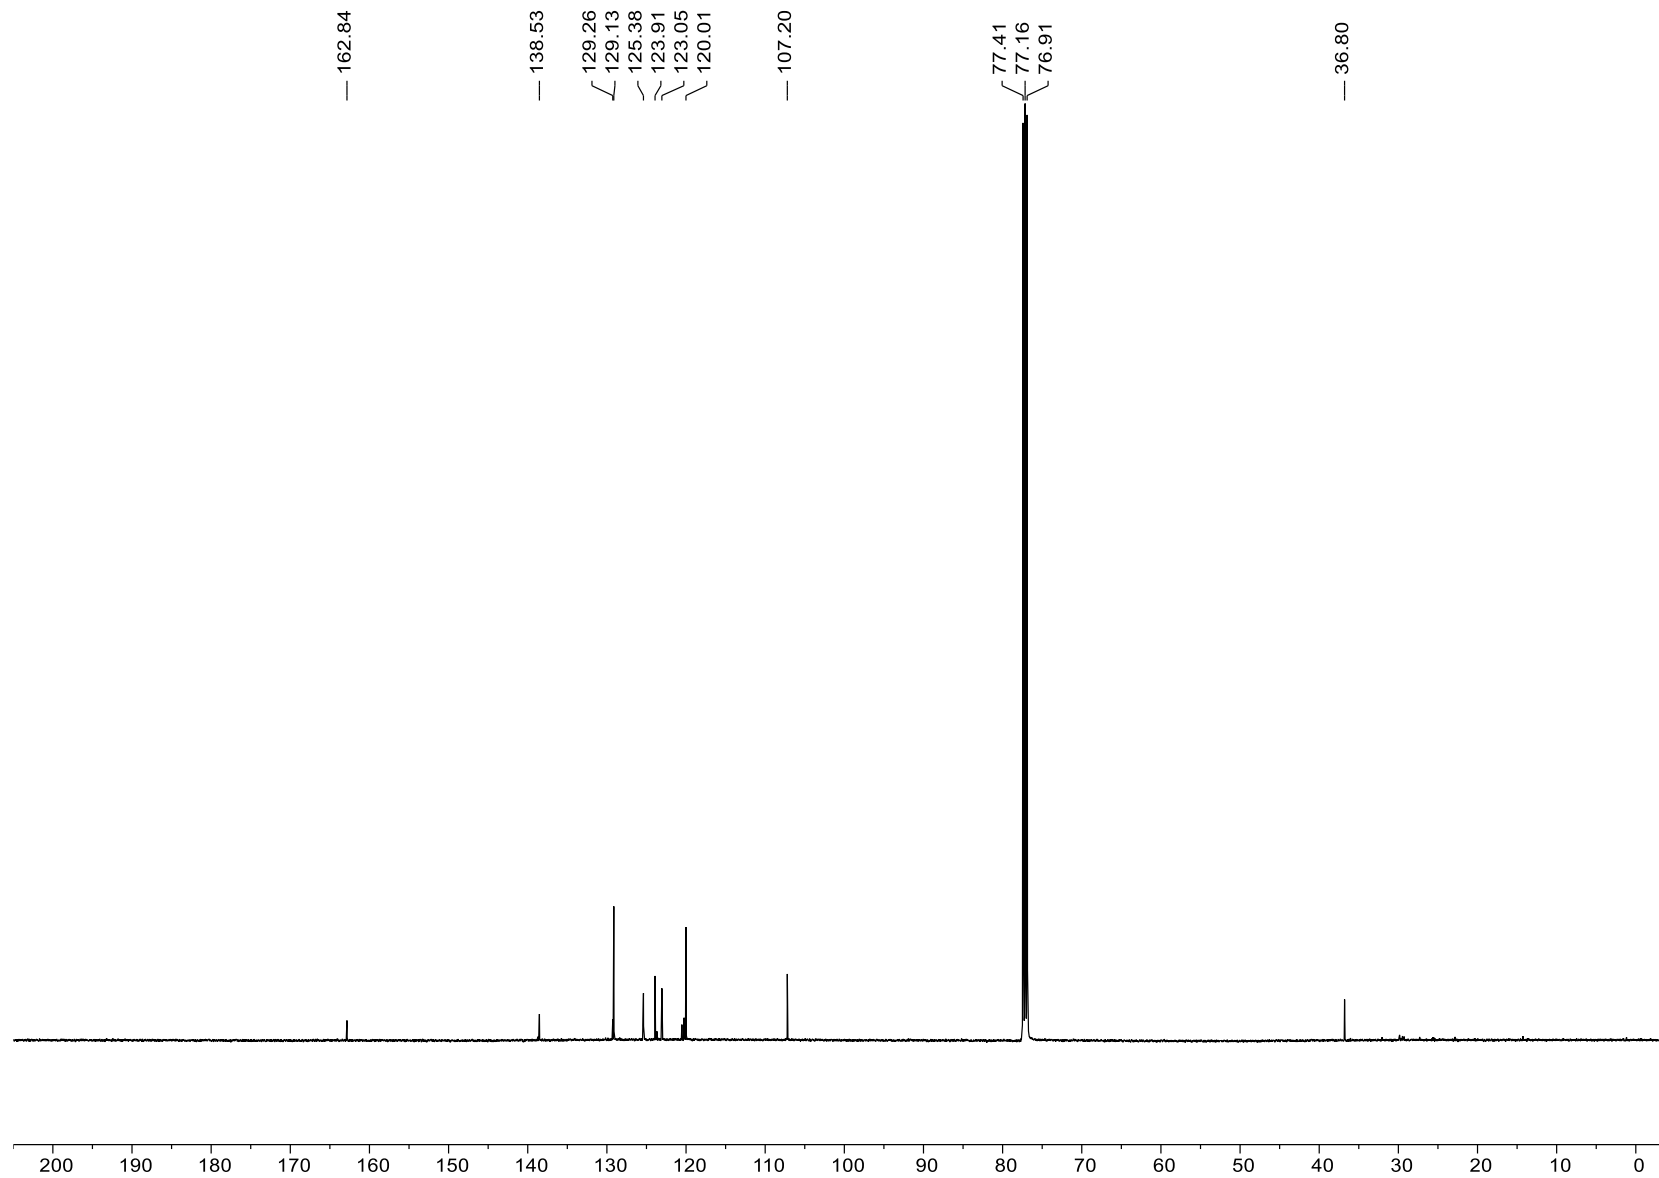



Figure S36:  $^1\text{H}$  NMR (500 MHz,  $\text{CDCl}_3$ , 298 K) spectrum of **1p**.

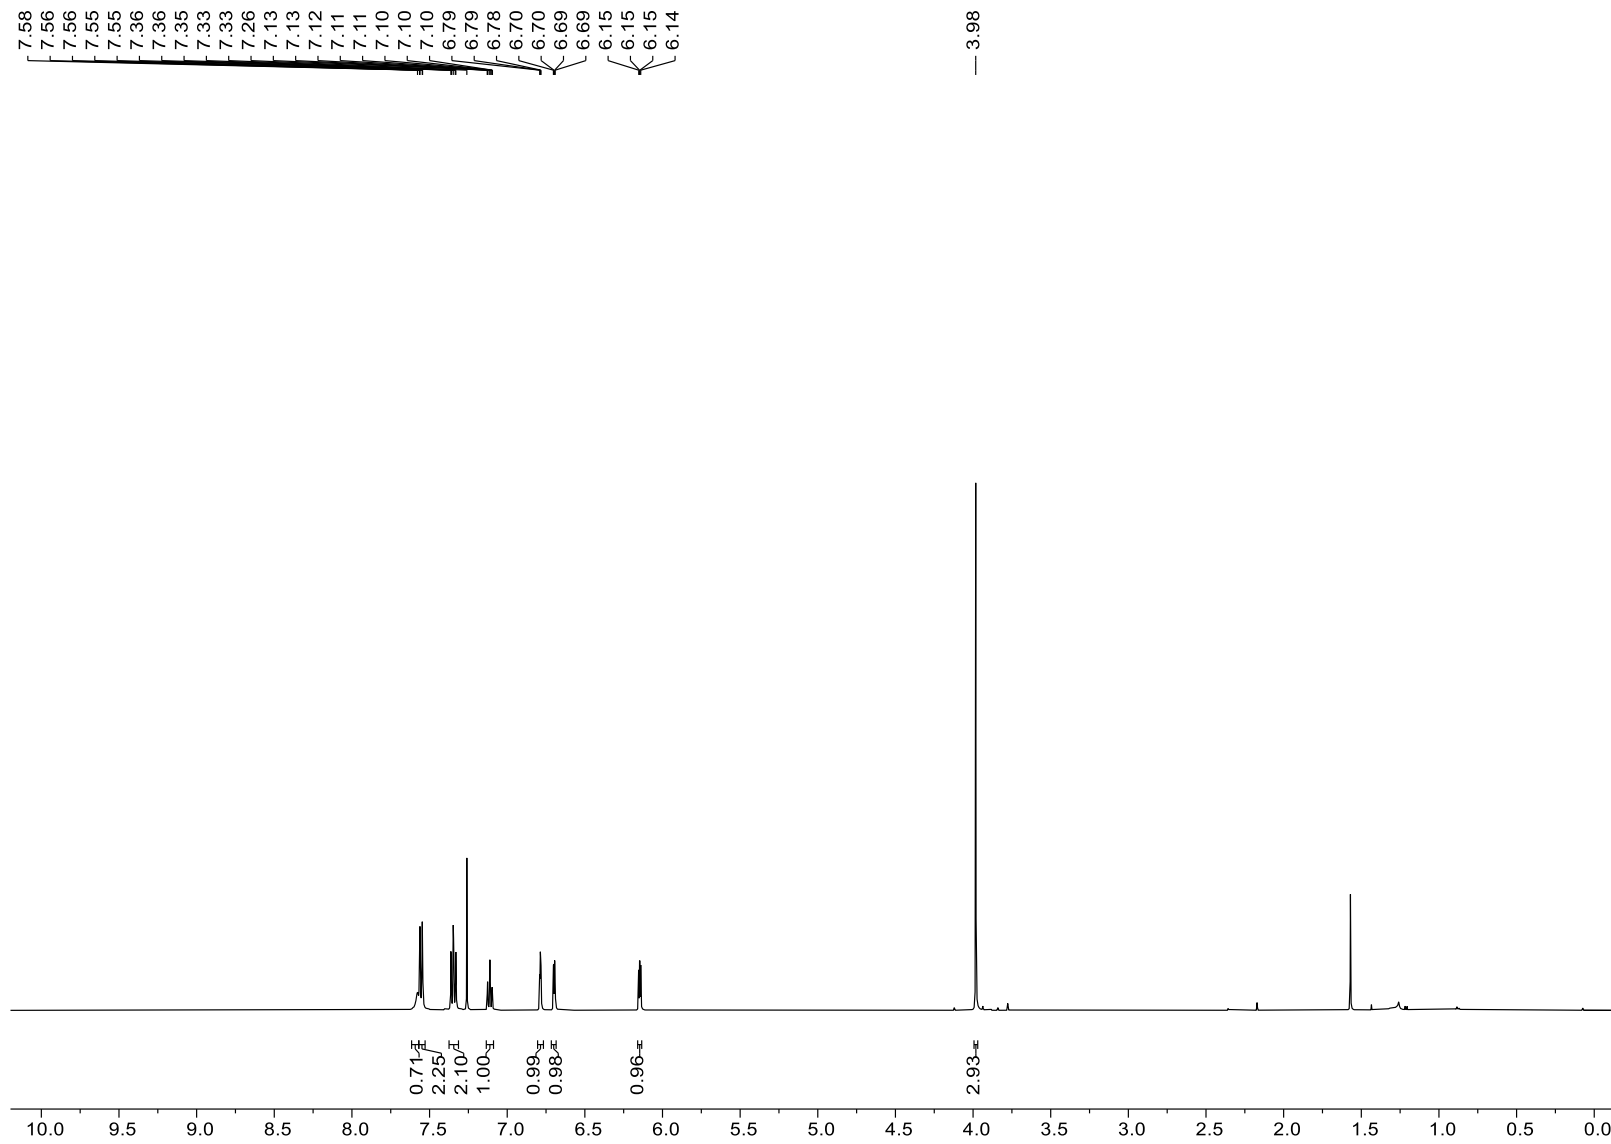

Figure S37:  $^{13}\text{C}$  NMR (126 MHz,  $\text{CDCl}_3$ , 298 K) spectrum of **1p**.

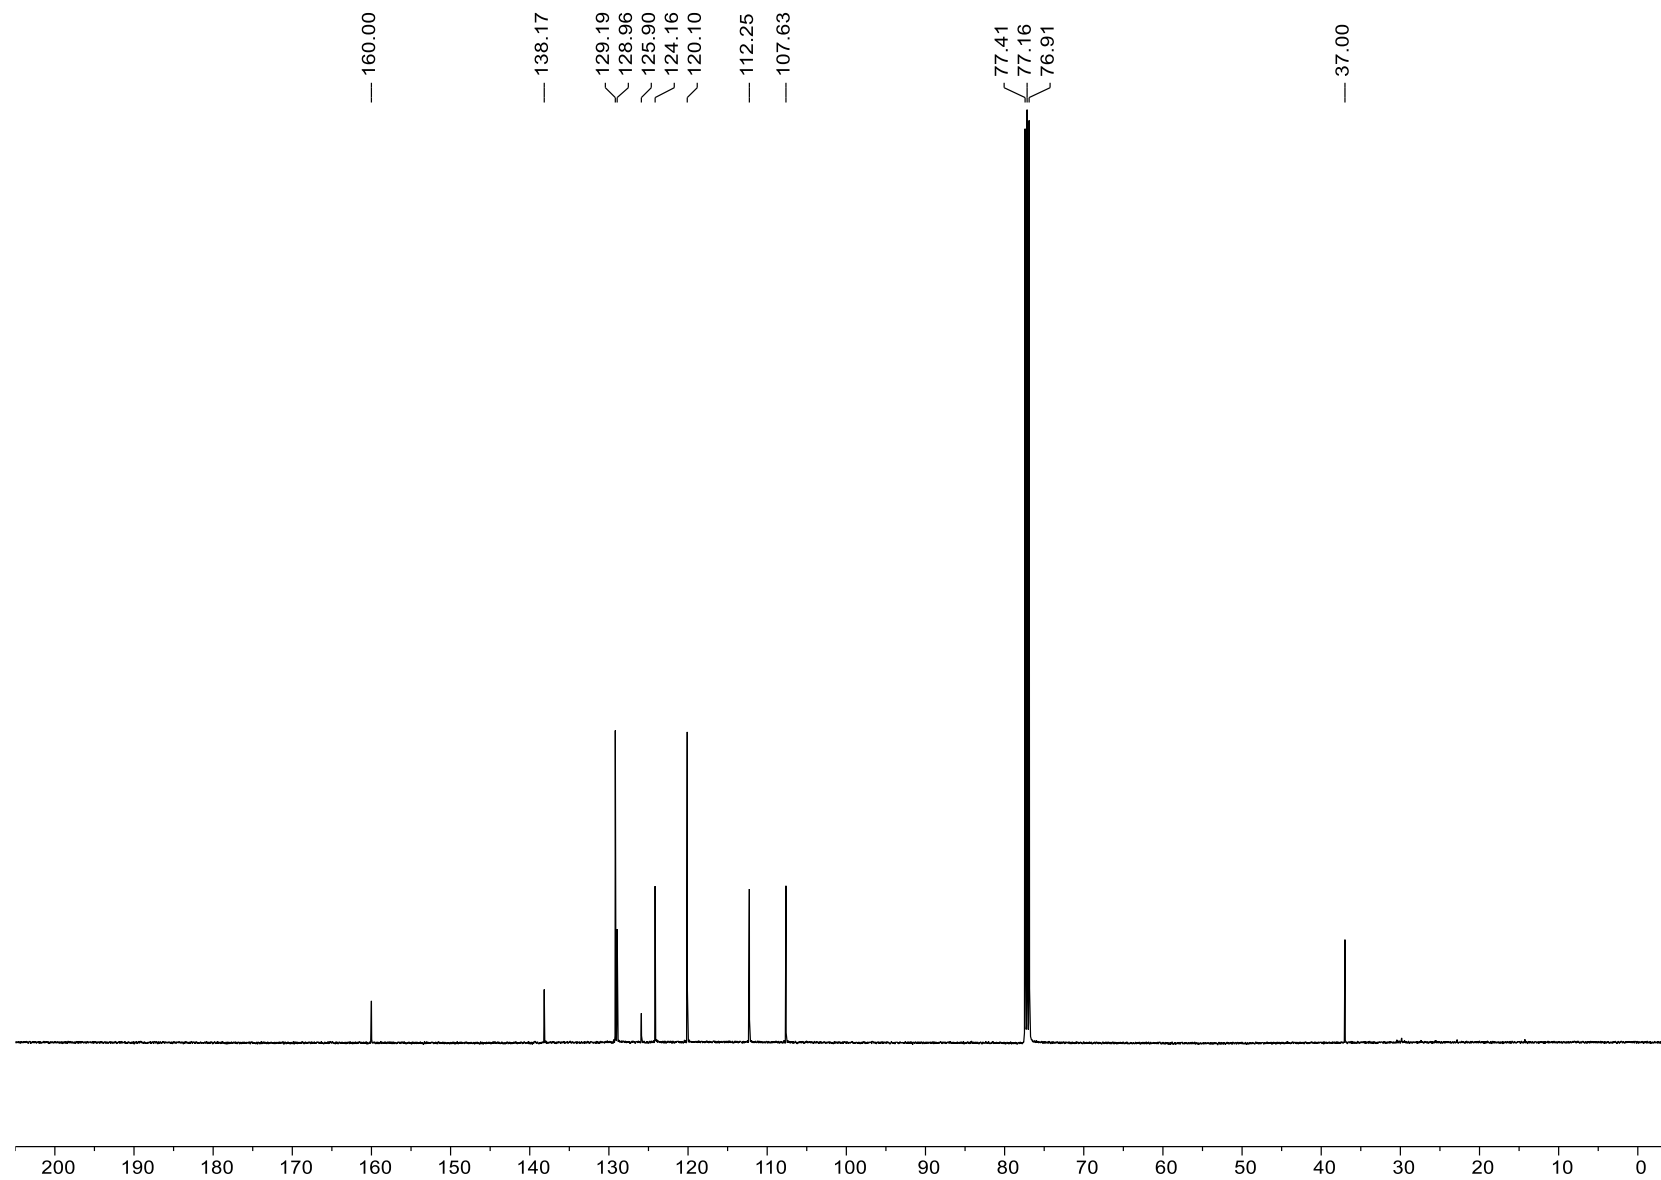

Figure S38:  $^1\text{H}$  NMR (500 MHz,  $\text{CDCl}_3$ , 298 K) spectrum of **1q**.

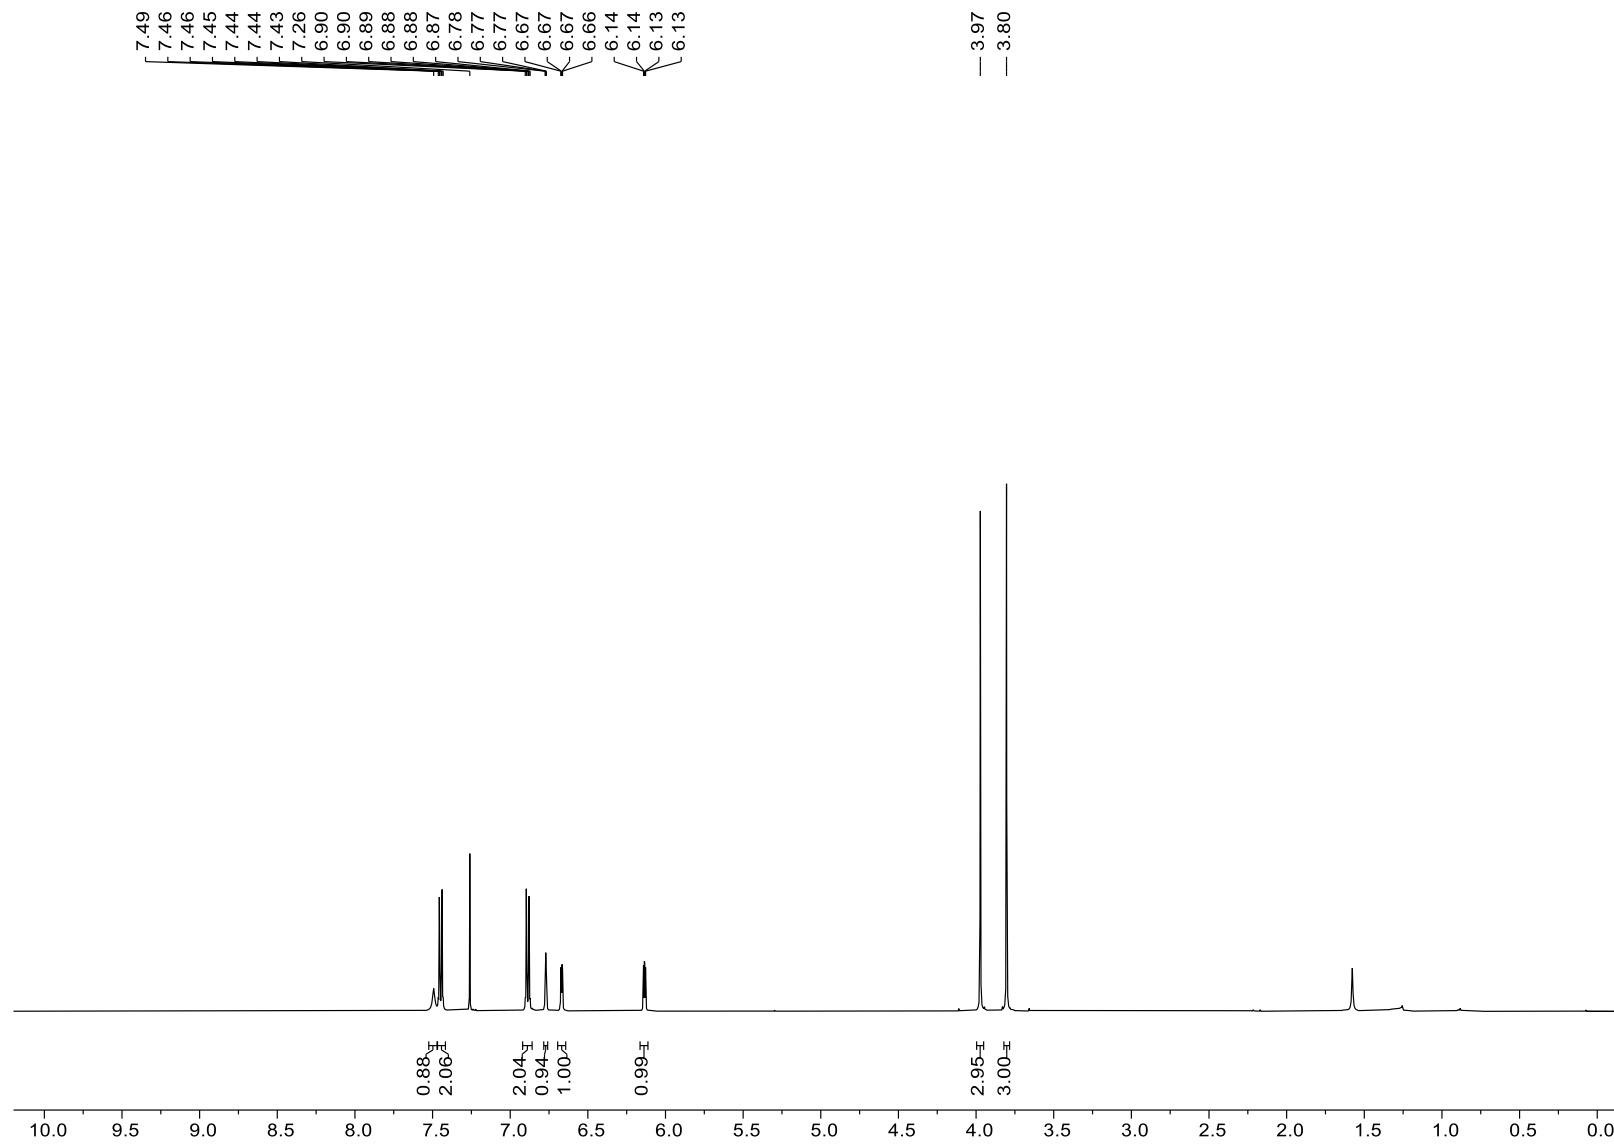

Figure S39:  $^{13}\text{C}$  NMR (126 MHz,  $\text{CDCl}_3$ , 298 K) spectrum of **1q**.

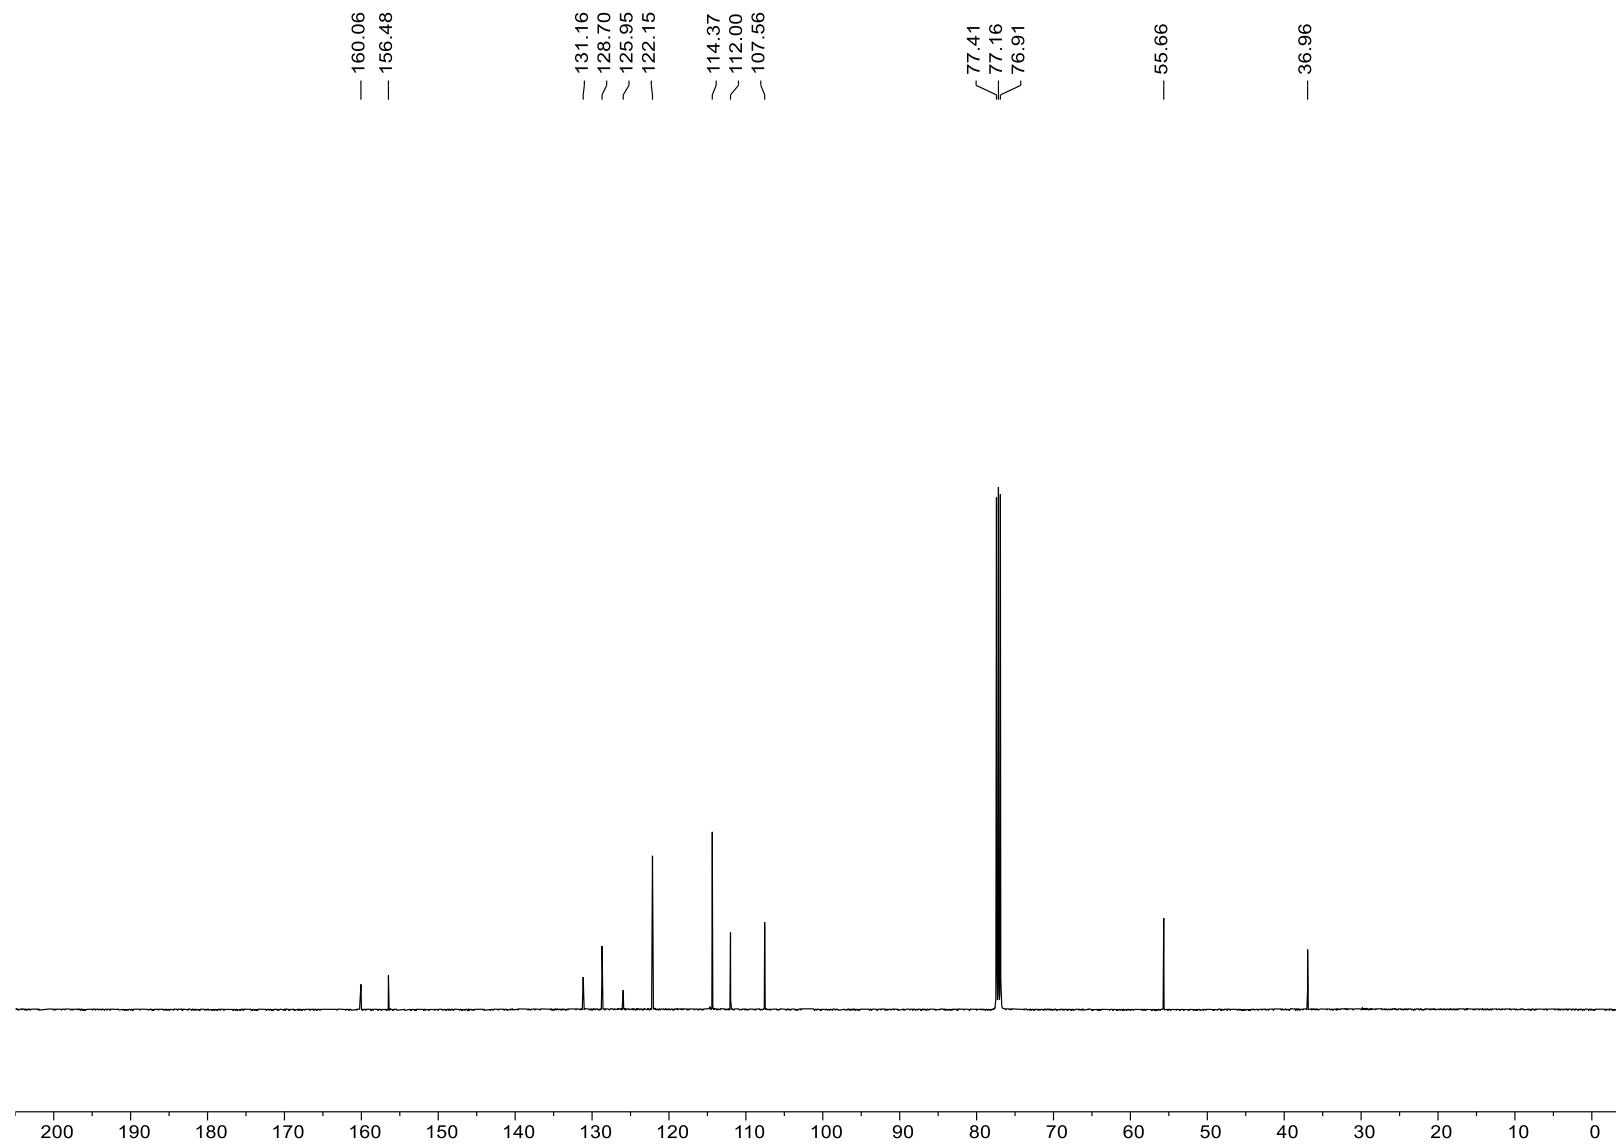

Figure S40:  $^1\text{H}$  NMR (500 MHz,  $\text{CDCl}_3$ , 298 K) spectrum of  $1\mathbf{a}\cdot\text{B}(\text{C}_6\text{F}_5)_3$ .

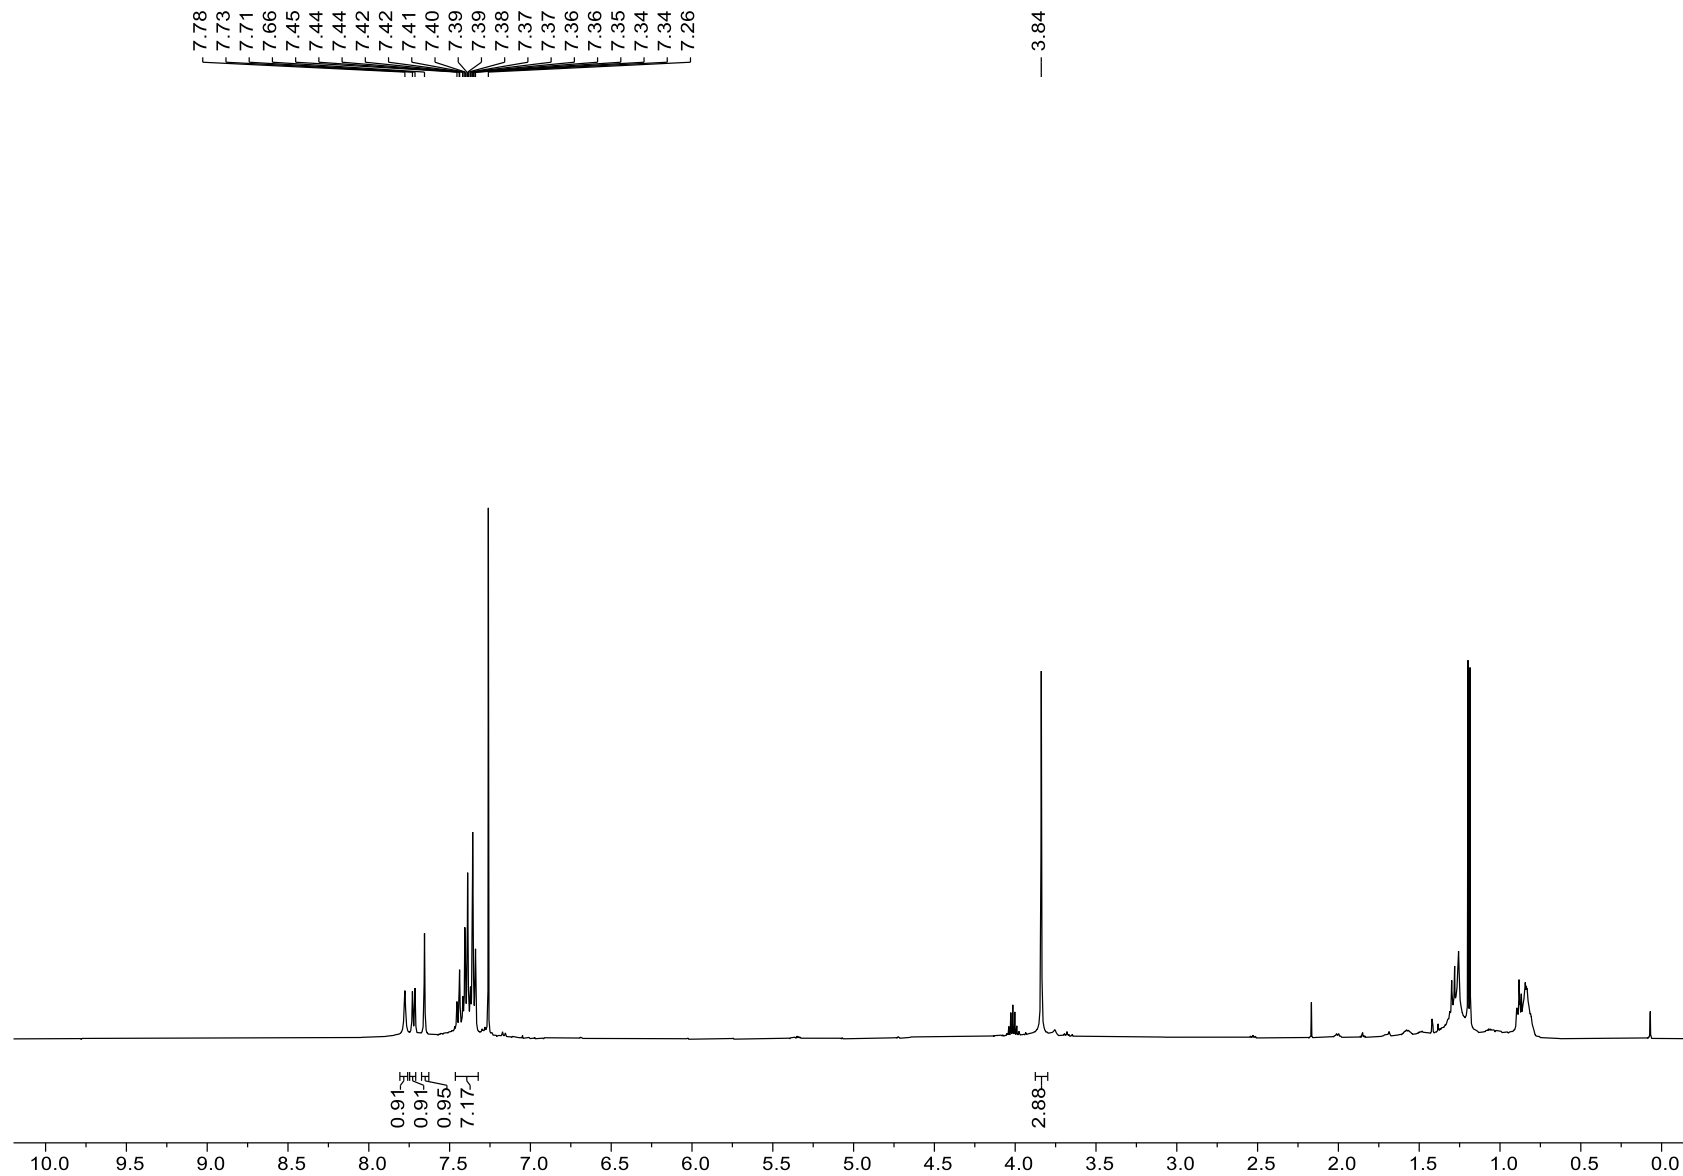

Figure S41:  $^{11}\text{B}$  NMR (128 MHz,  $\text{CDCl}_3$ , 298 K) spectrum of  $\mathbf{1a}\cdot\text{B}(\text{C}_6\text{F}_5)_3$ .

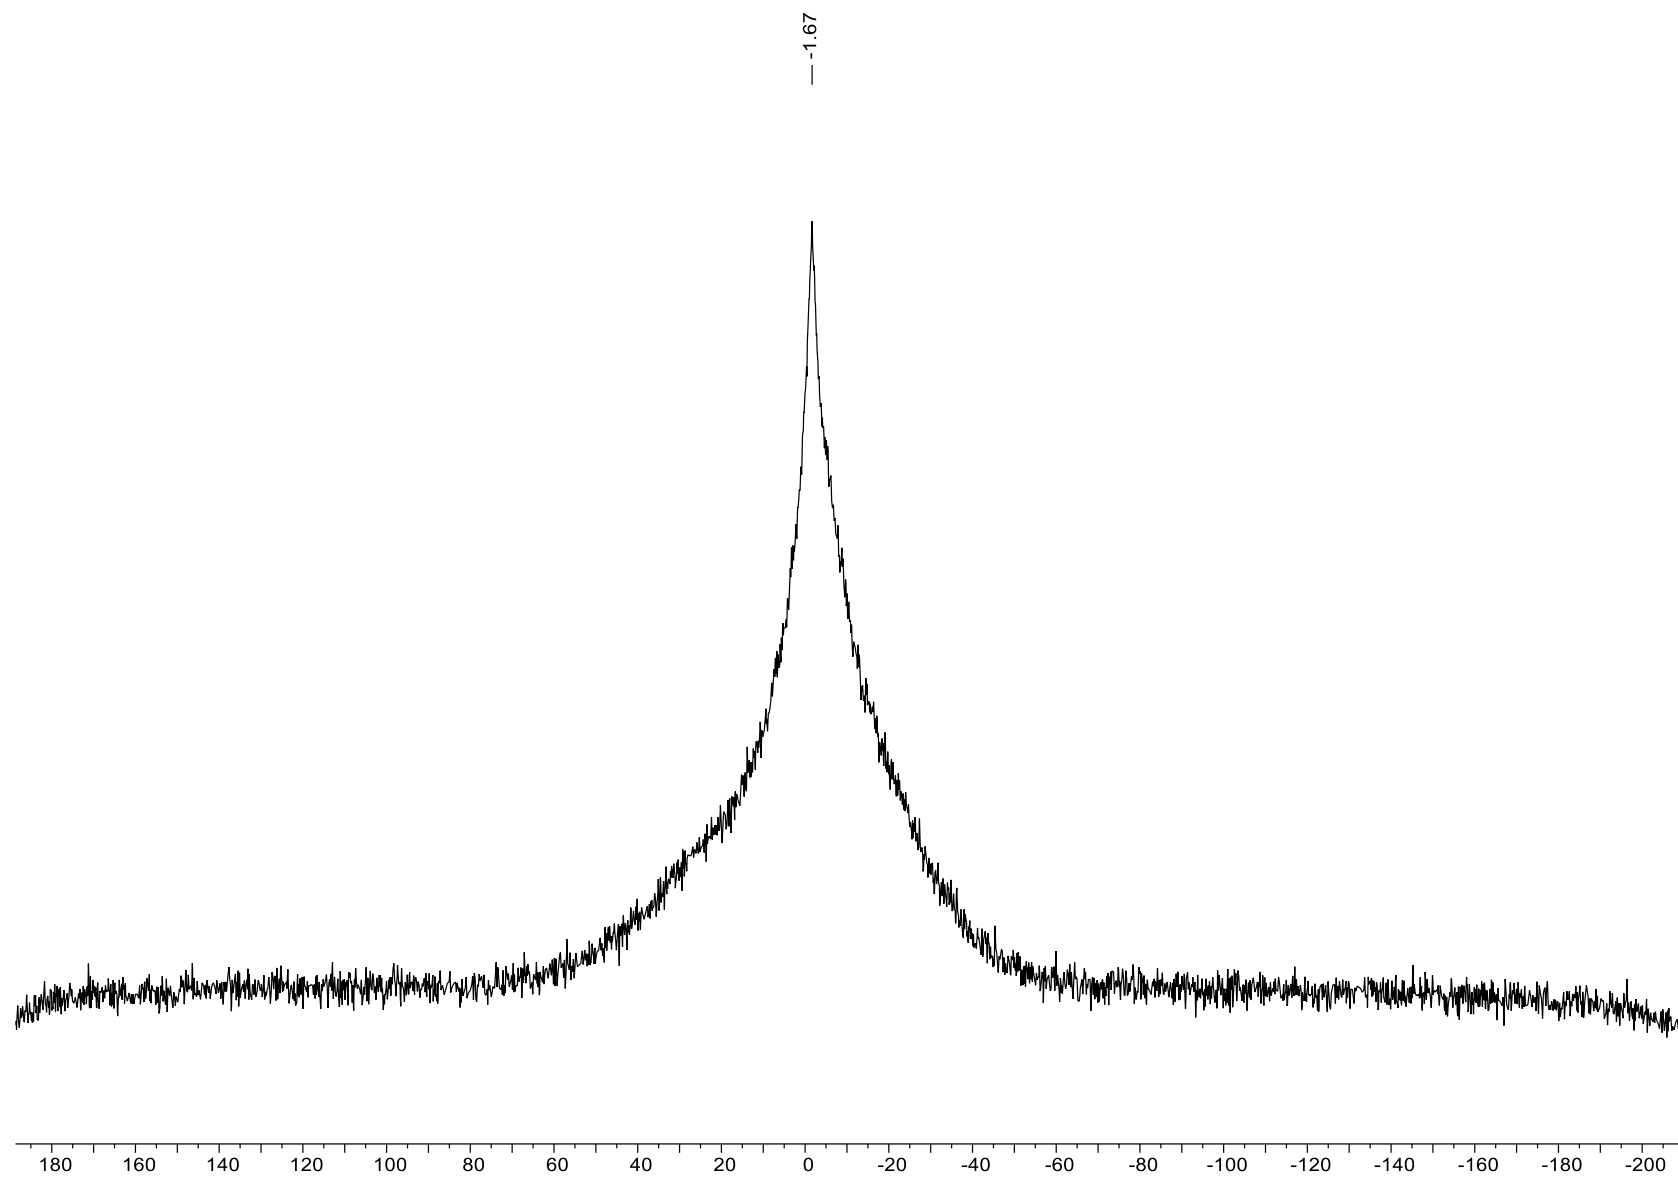

Figure S42:  $^{19}\text{F}$  NMR (471 MHz,  $\text{CDCl}_3$ , 298 K) of  $\mathbf{1a} \cdot \mathbf{B}(\text{C}_6\text{F}_5)_3$ .

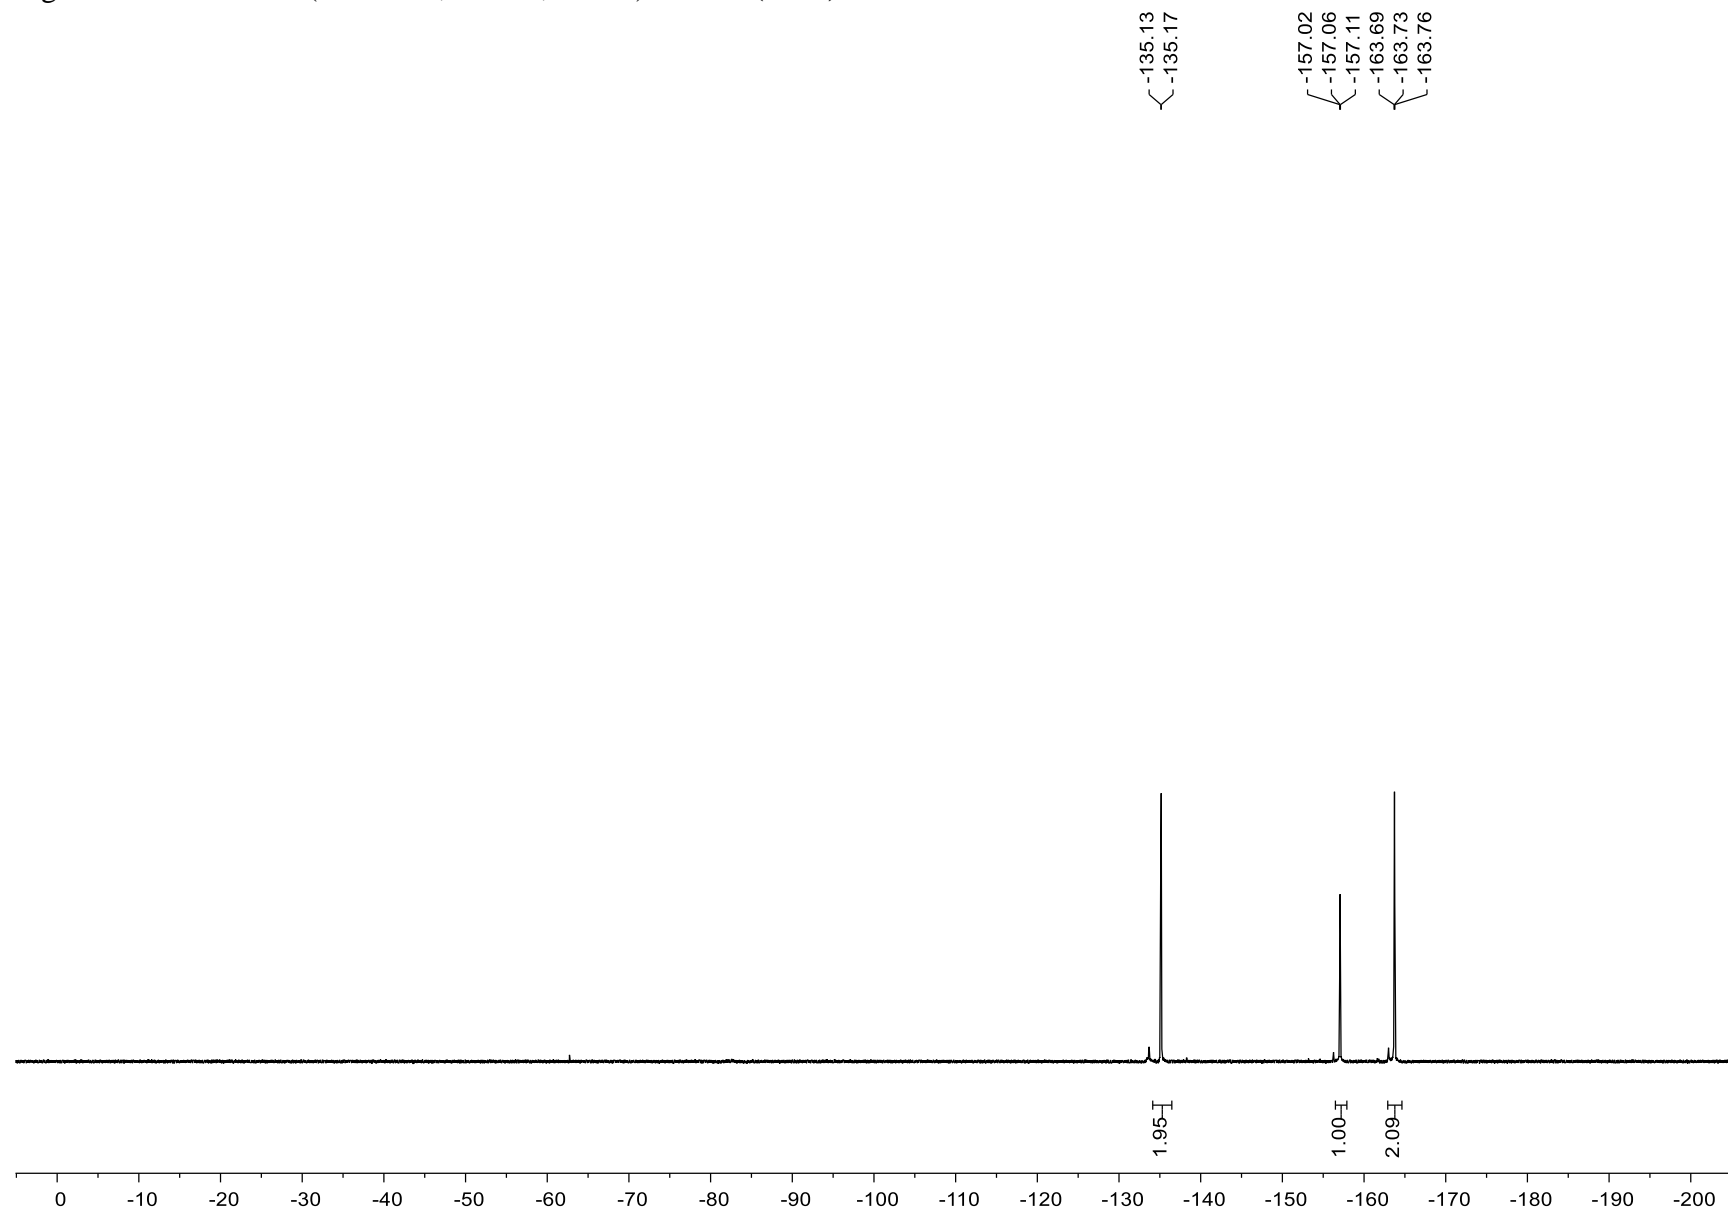

Figure S43:  $^1\text{H}$  NMR (500 MHz,  $\text{CDCl}_3$ , 298 K) spectrum of  $\mathbf{1b} \cdot \mathbf{B}(\text{C}_6\text{F}_5)_3$ .

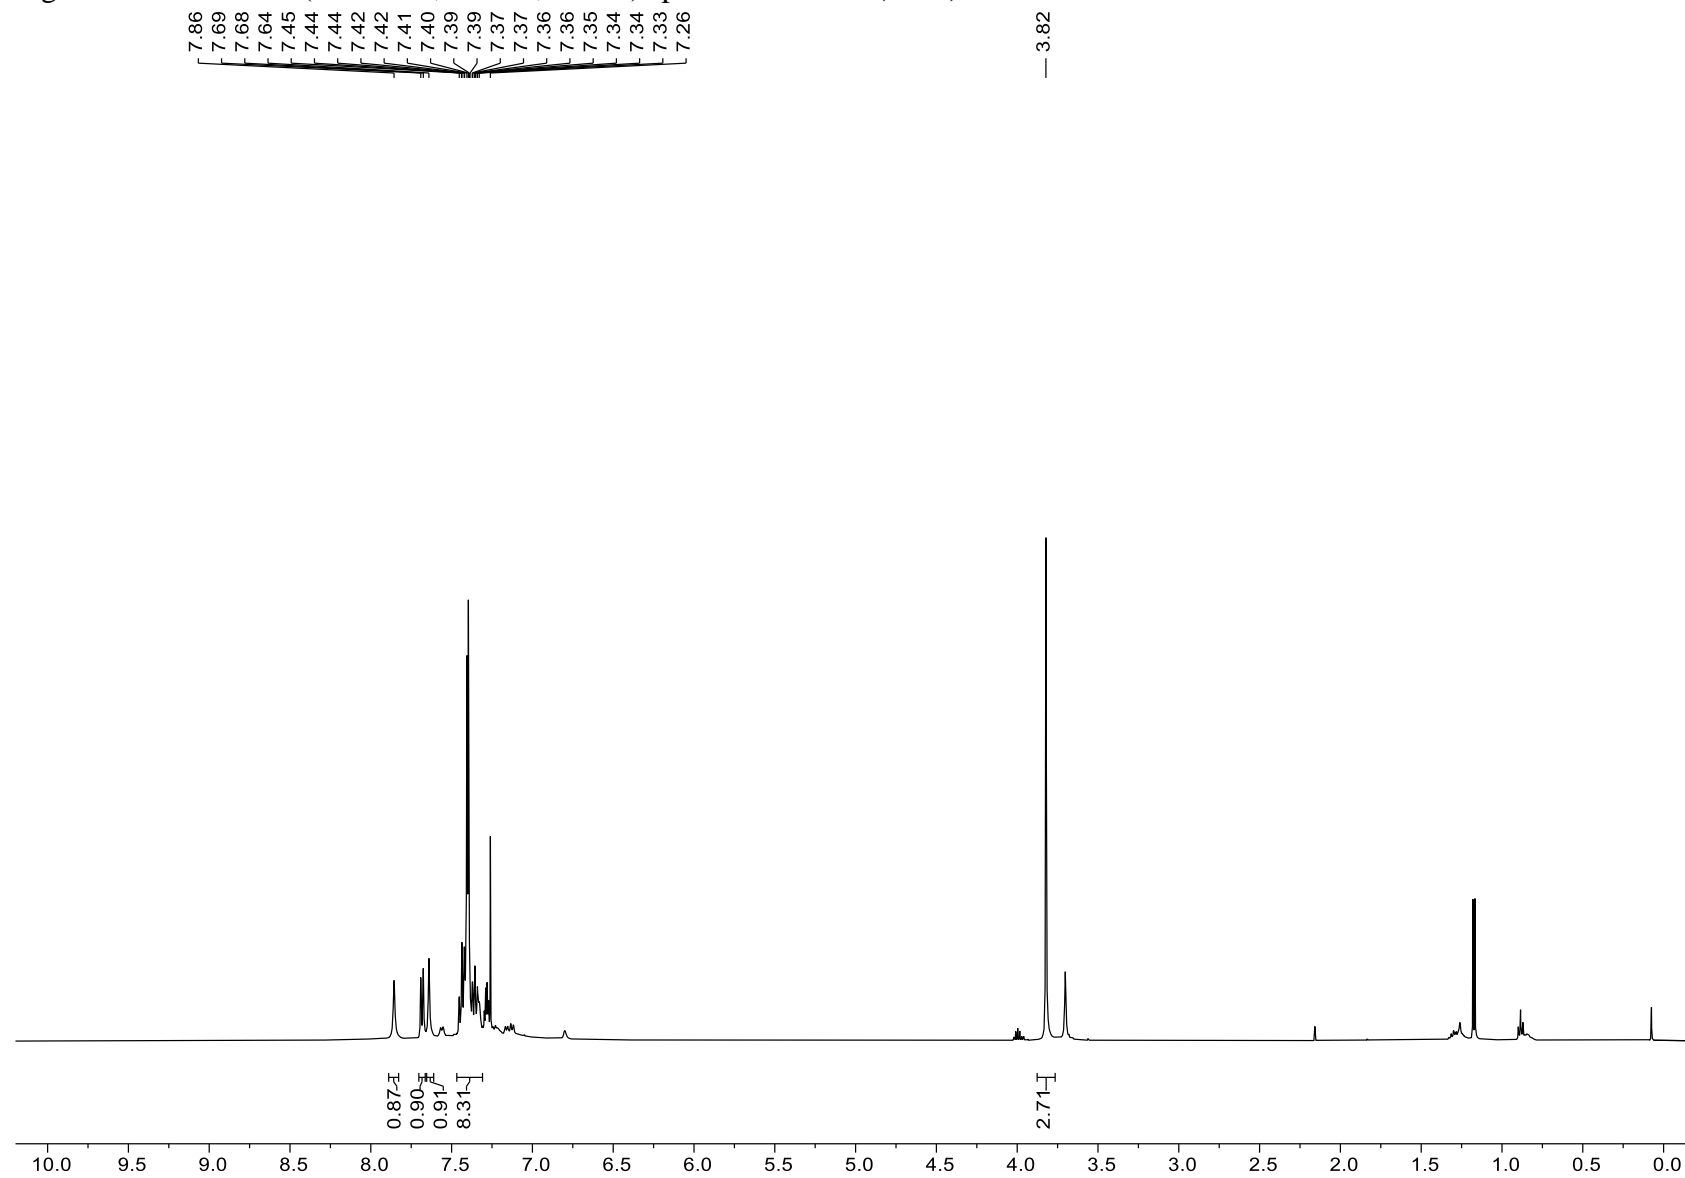



Figure S44:  $^{13}\text{C}$  NMR (126 MHz,  $\text{CDCl}_3$ , 298 K) spectrum of  $\mathbf{1b}\cdot\text{B}(\text{C}_6\text{F}_5)_3$ .

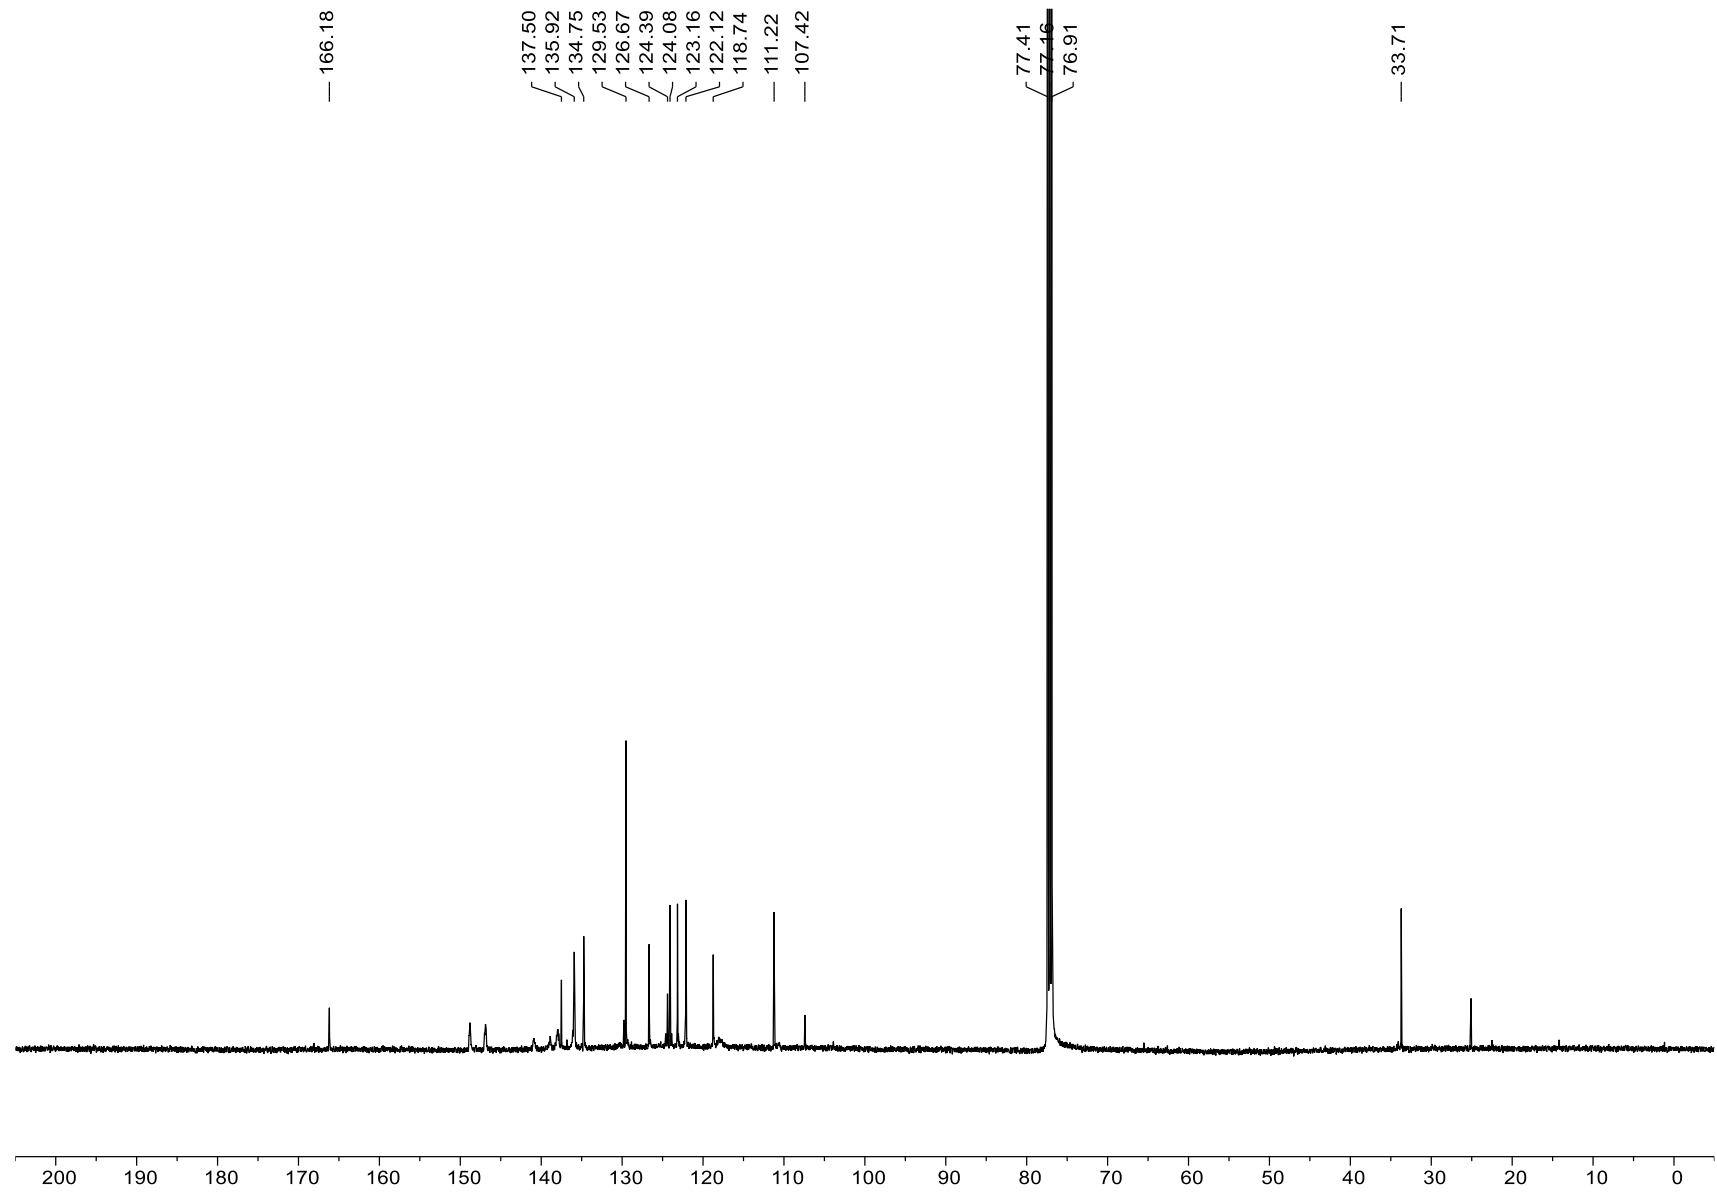

Figure S45:  $^{11}\text{B}$  NMR (128 MHz,  $\text{CDCl}_3$ , 298 K) spectrum of  $\mathbf{1b} \cdot \mathbf{B}(\text{C}_6\text{F}_5)_3$ .

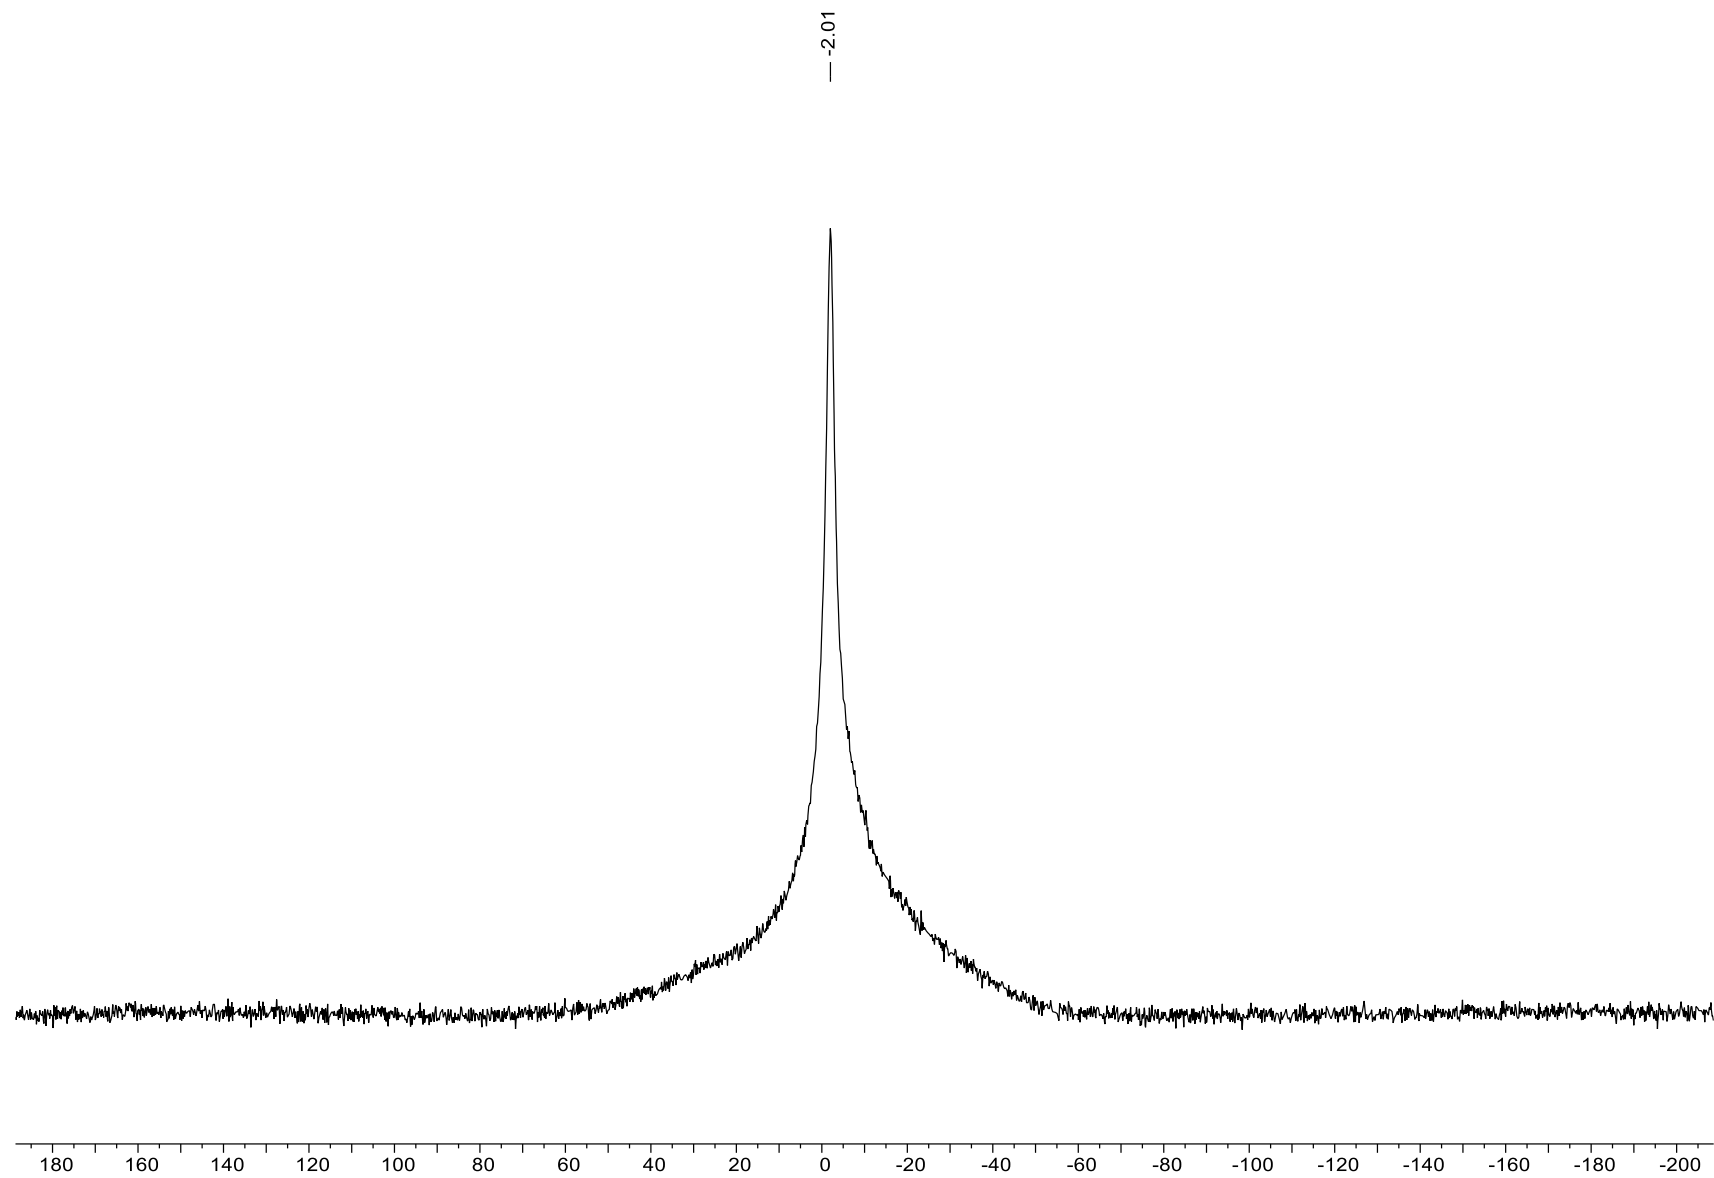

Figure S46:  $^{19}\text{F}$  NMR (471 MHz,  $\text{CDCl}_3$ , 298 K) of  $\mathbf{1b} \cdot \mathbf{B}(\text{C}_6\text{F}_5)_3$ .

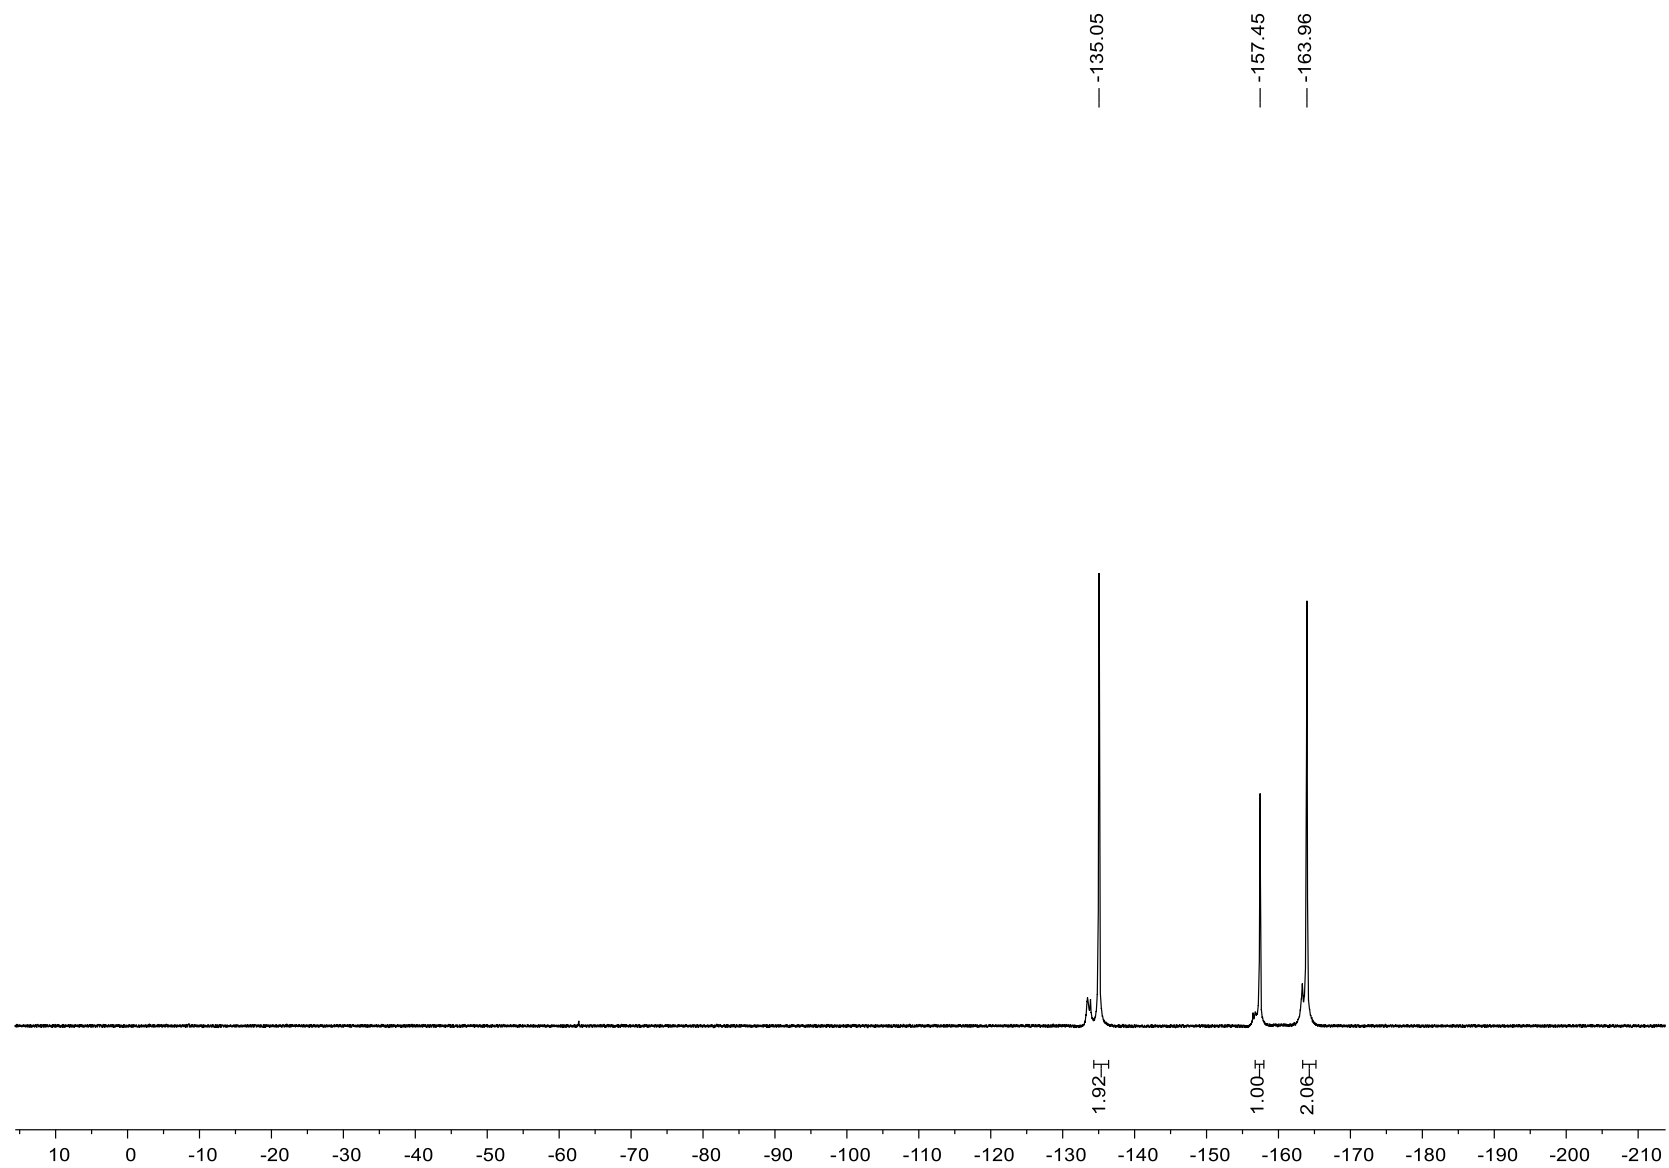

Figure S47:  $^1\text{H}$  NMR (500 MHz,  $\text{CDCl}_3$ , 298 K) spectrum of **2**.

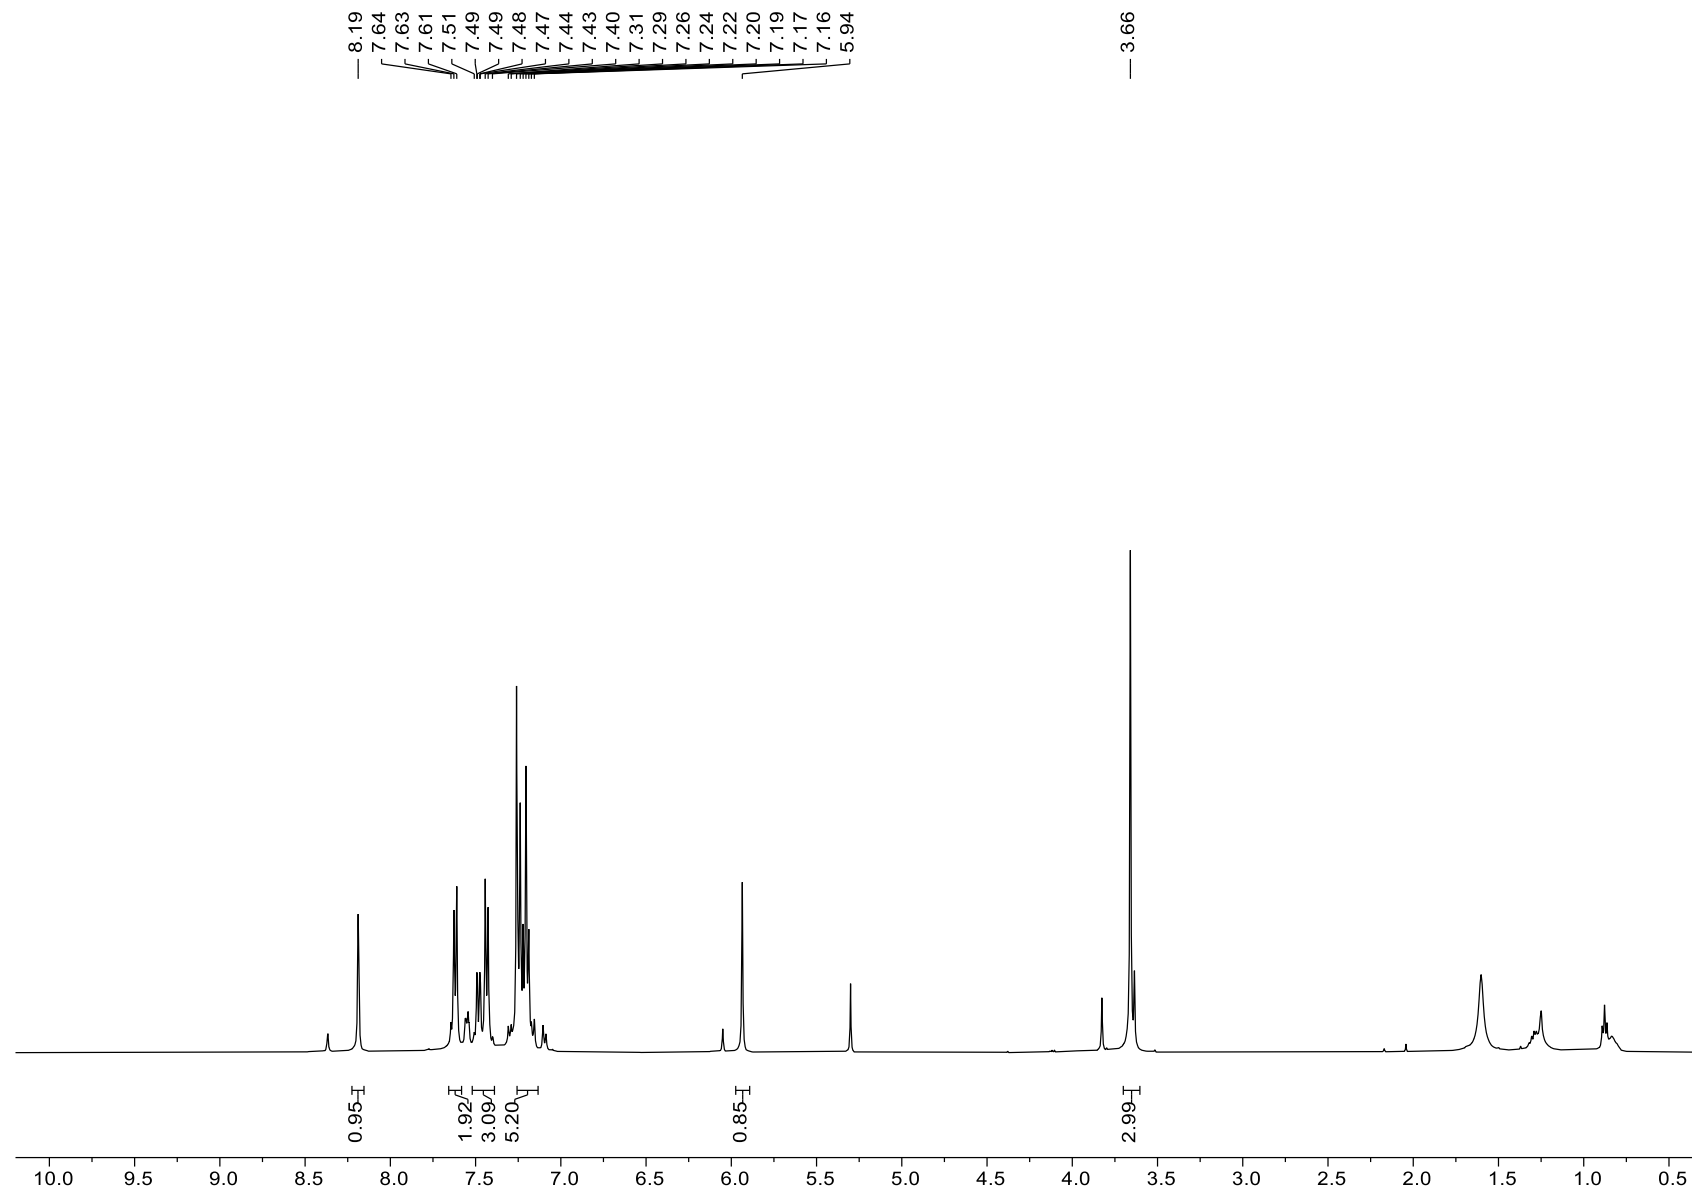

Figure S48:  $^{13}\text{C}$  NMR (126 MHz,  $\text{CDCl}_3$ , 298K) spectrum of **2**.

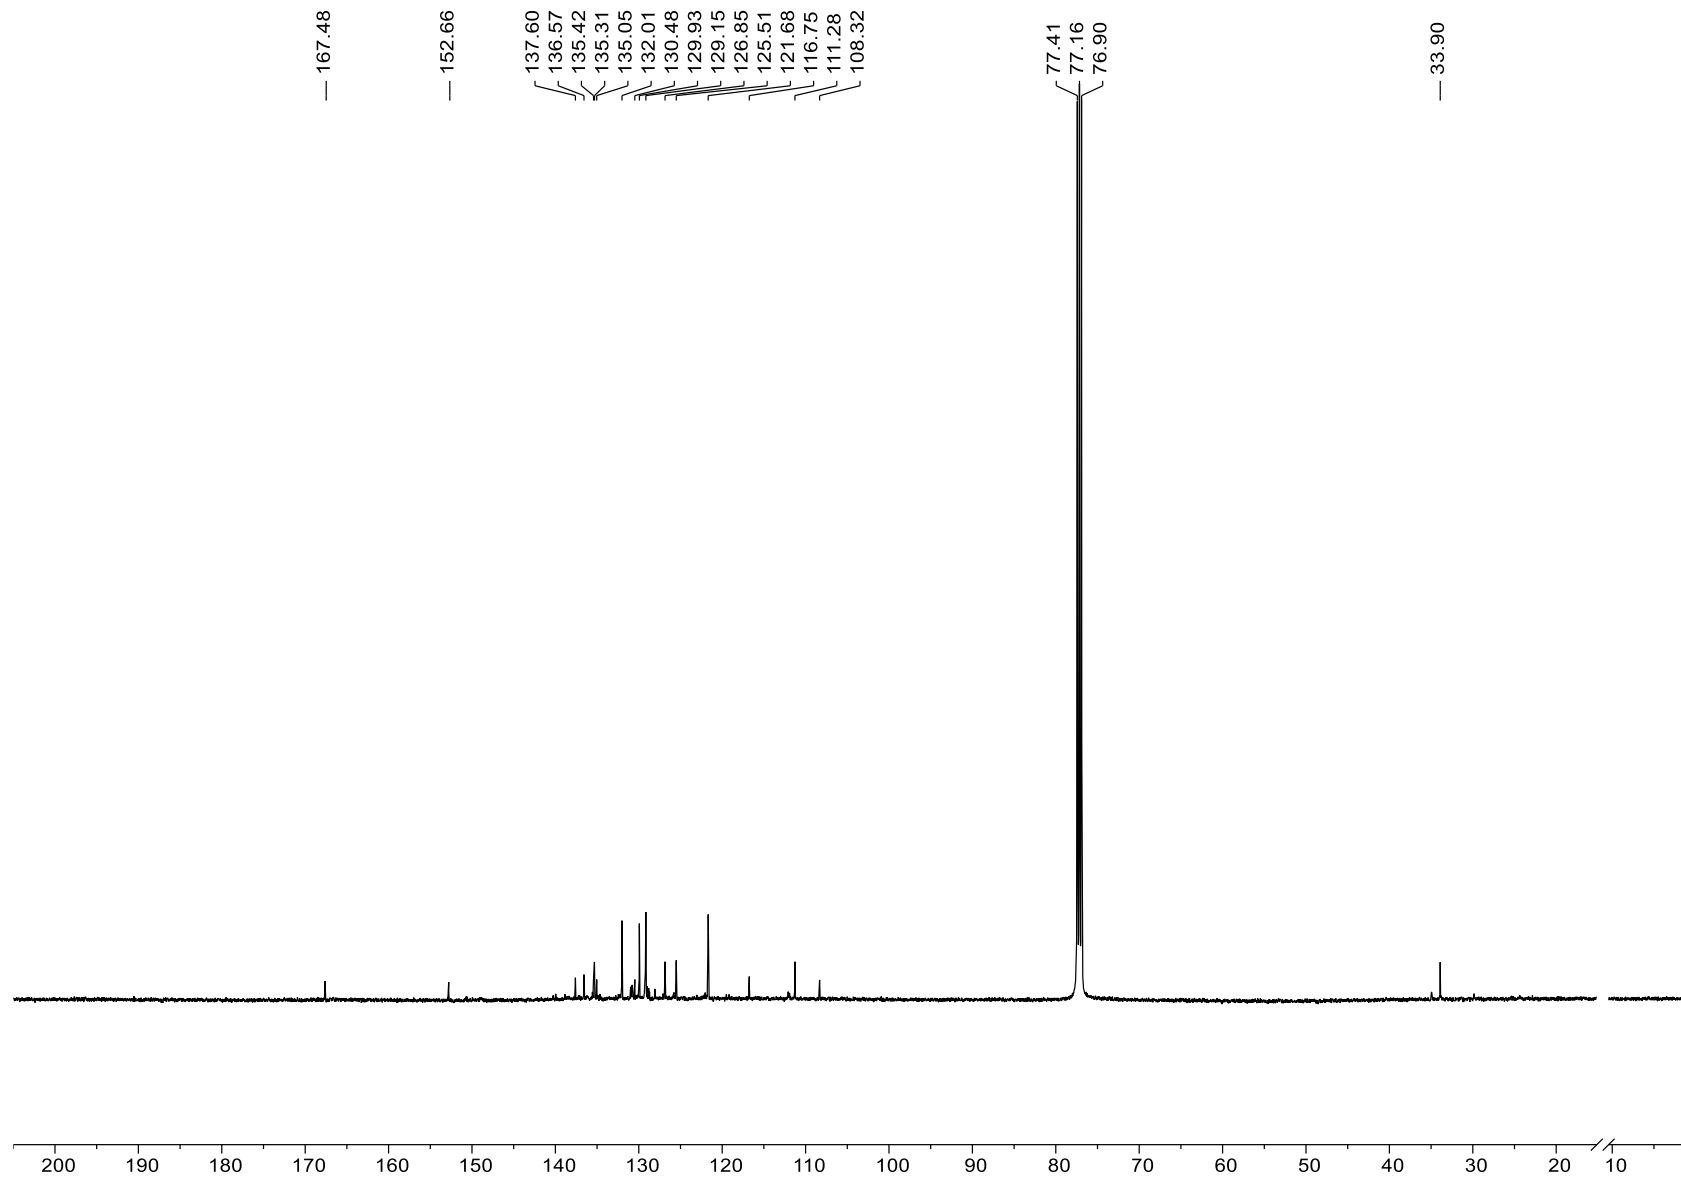

Figure S49:  $^{11}\text{B}$  NMR (128 MHz,  $\text{CDCl}_3$ , 298 K) spectrum of **2**.

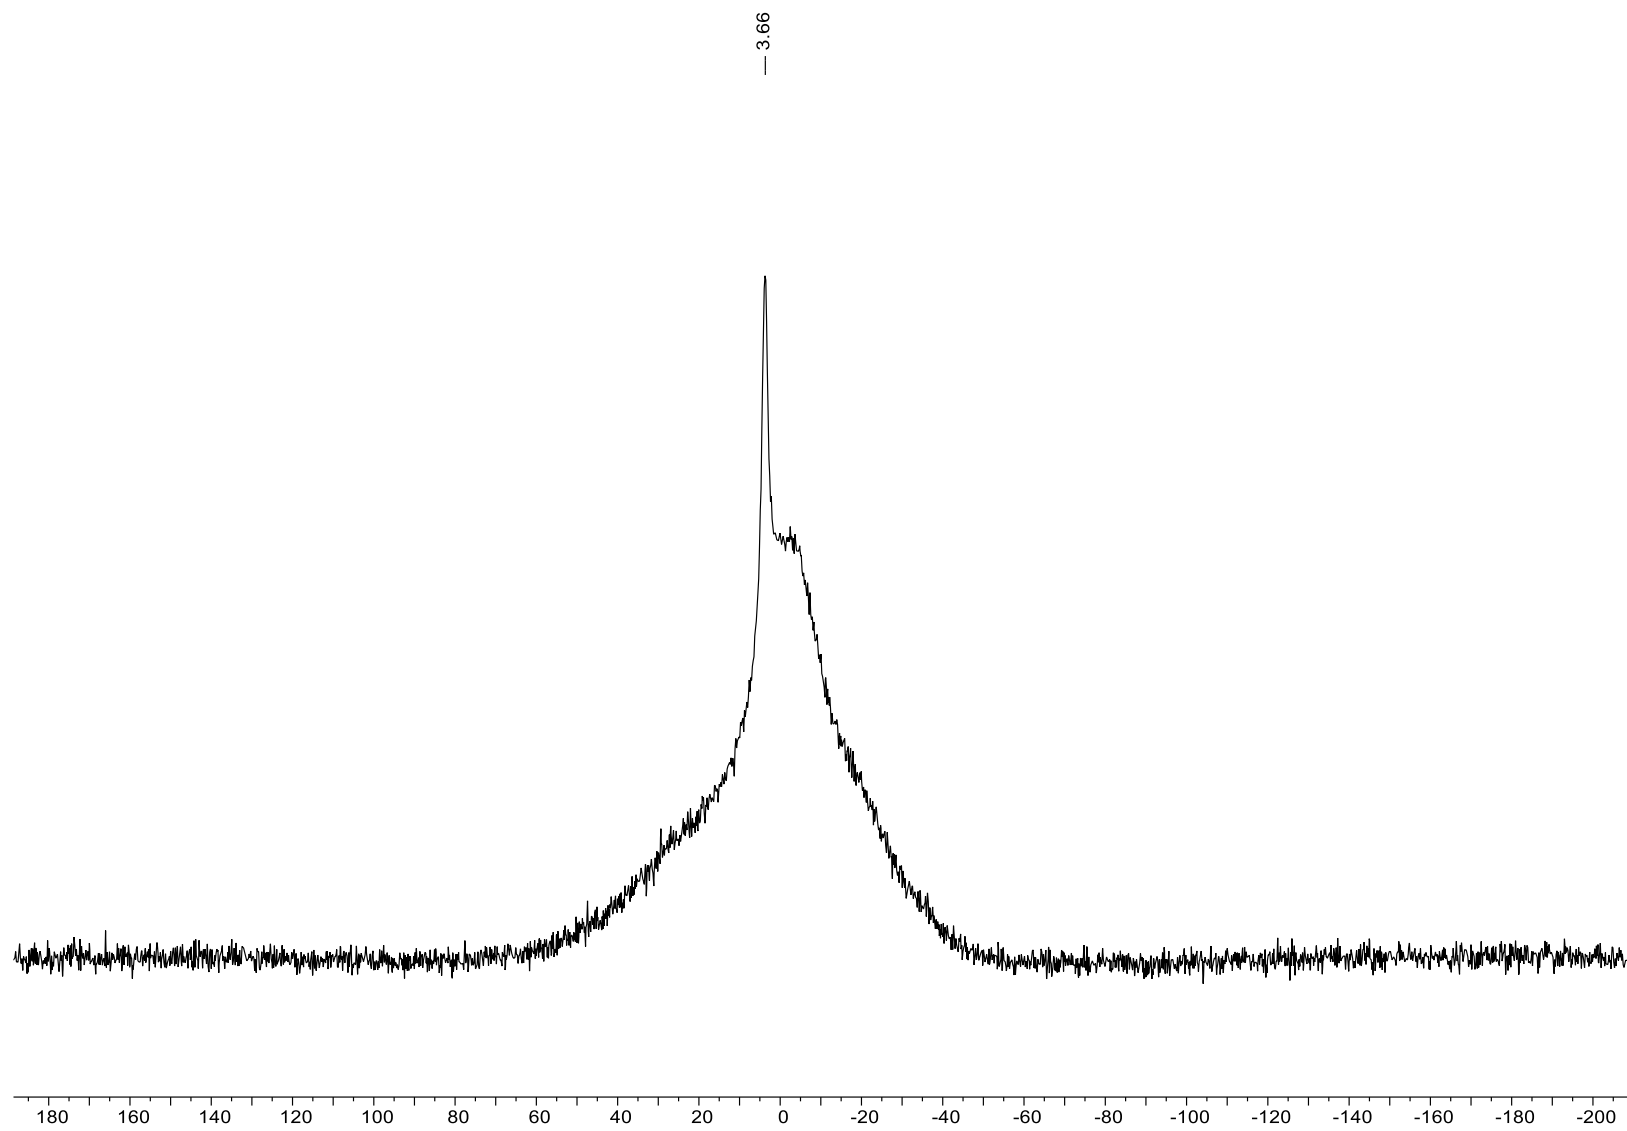

Figure S50:  $^{19}\text{F}$  NMR (376 MHz,  $\text{CDCl}_3$ , 298 K) spectrum of **2**.

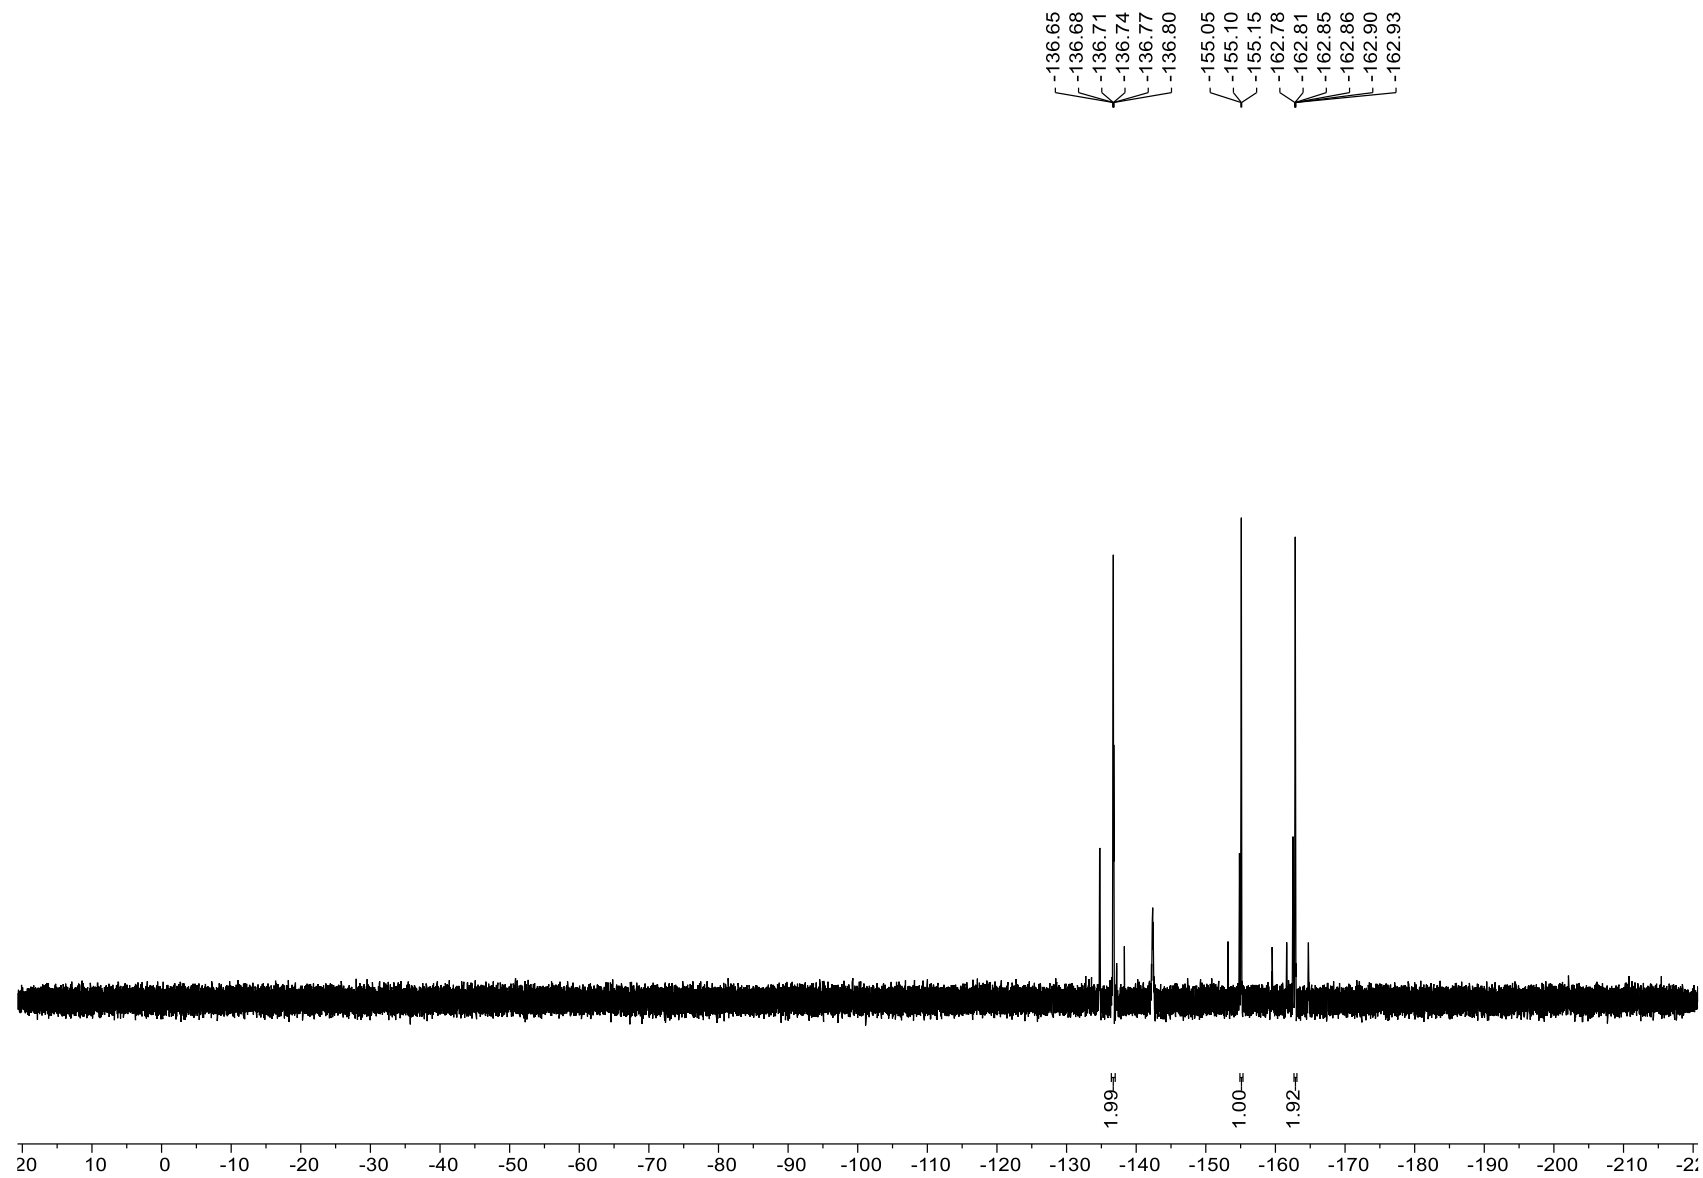

Figure S51:  $^1\text{H}$  NMR (500 MHz,  $\text{CDCl}_3$ , 298 K) spectrum of **3**.

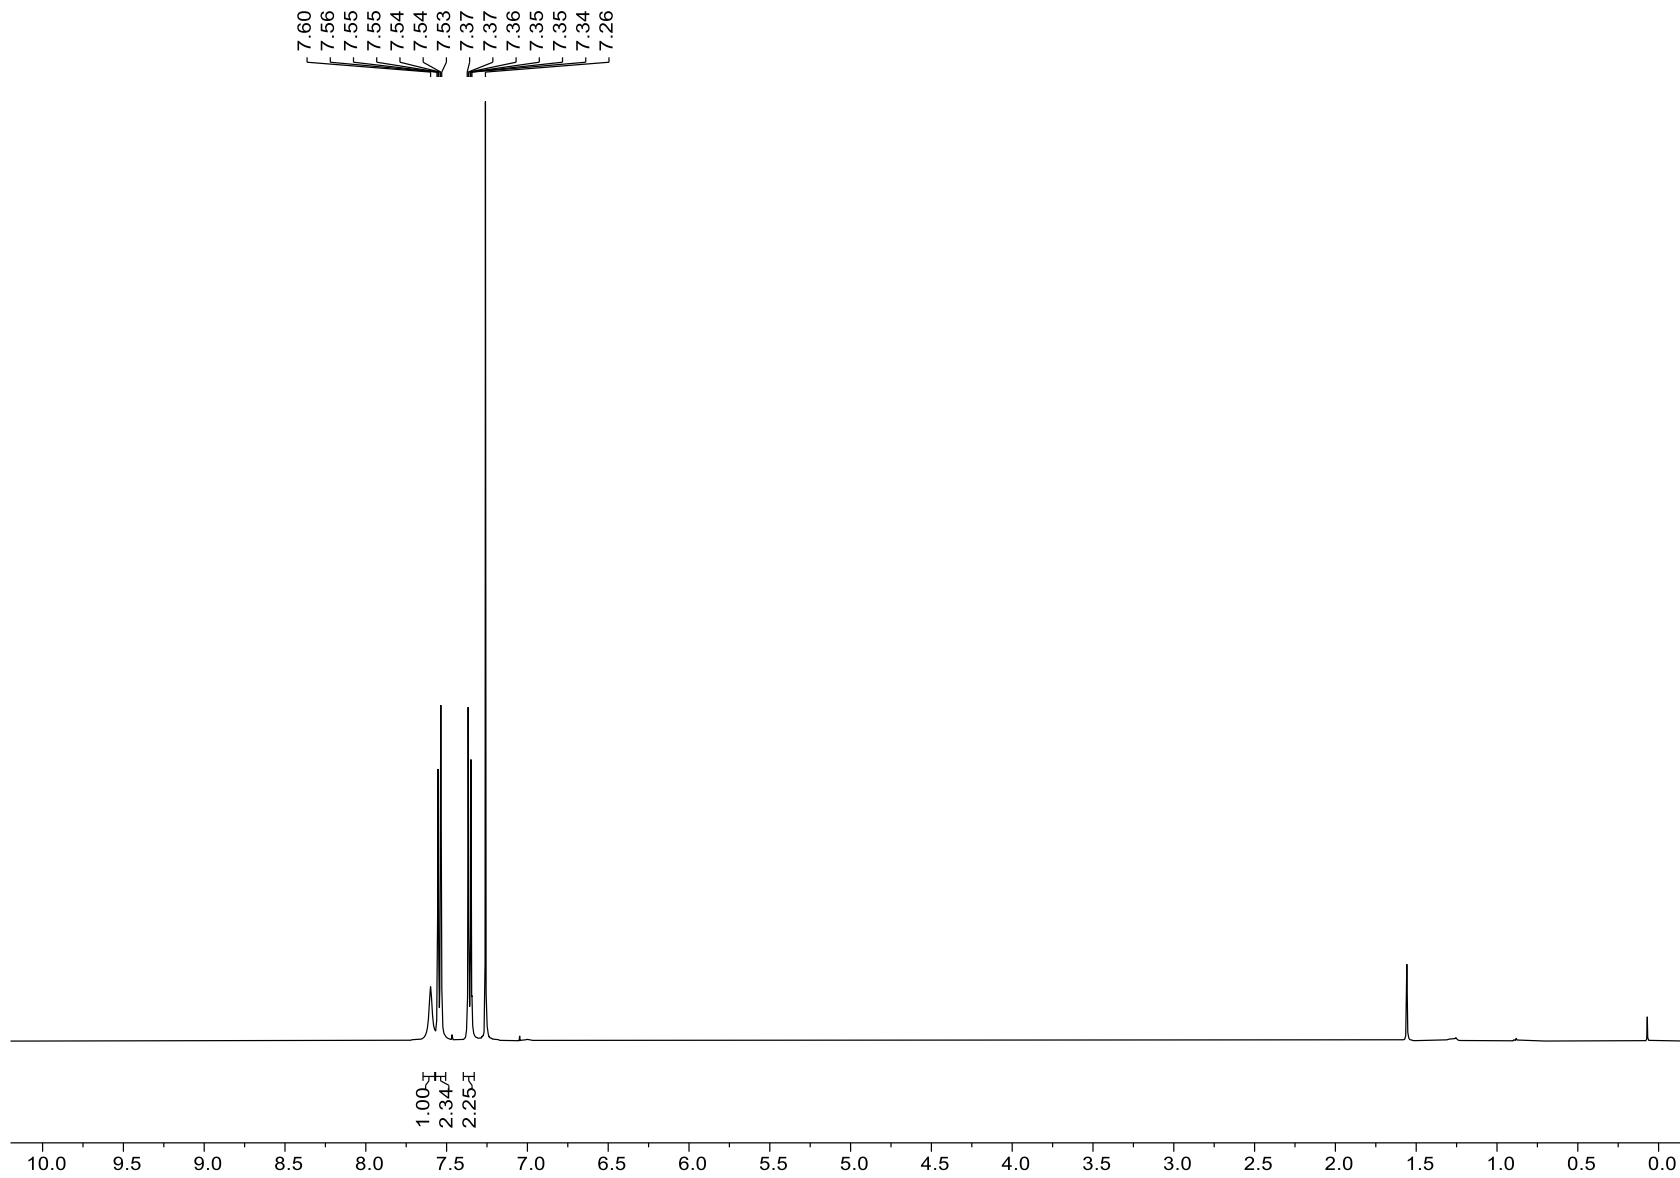



Figure S52:  $^{13}\text{C}$  NMR (126 MHz,  $\text{CDCl}_3$ , 298 K) spectrum of **3**.

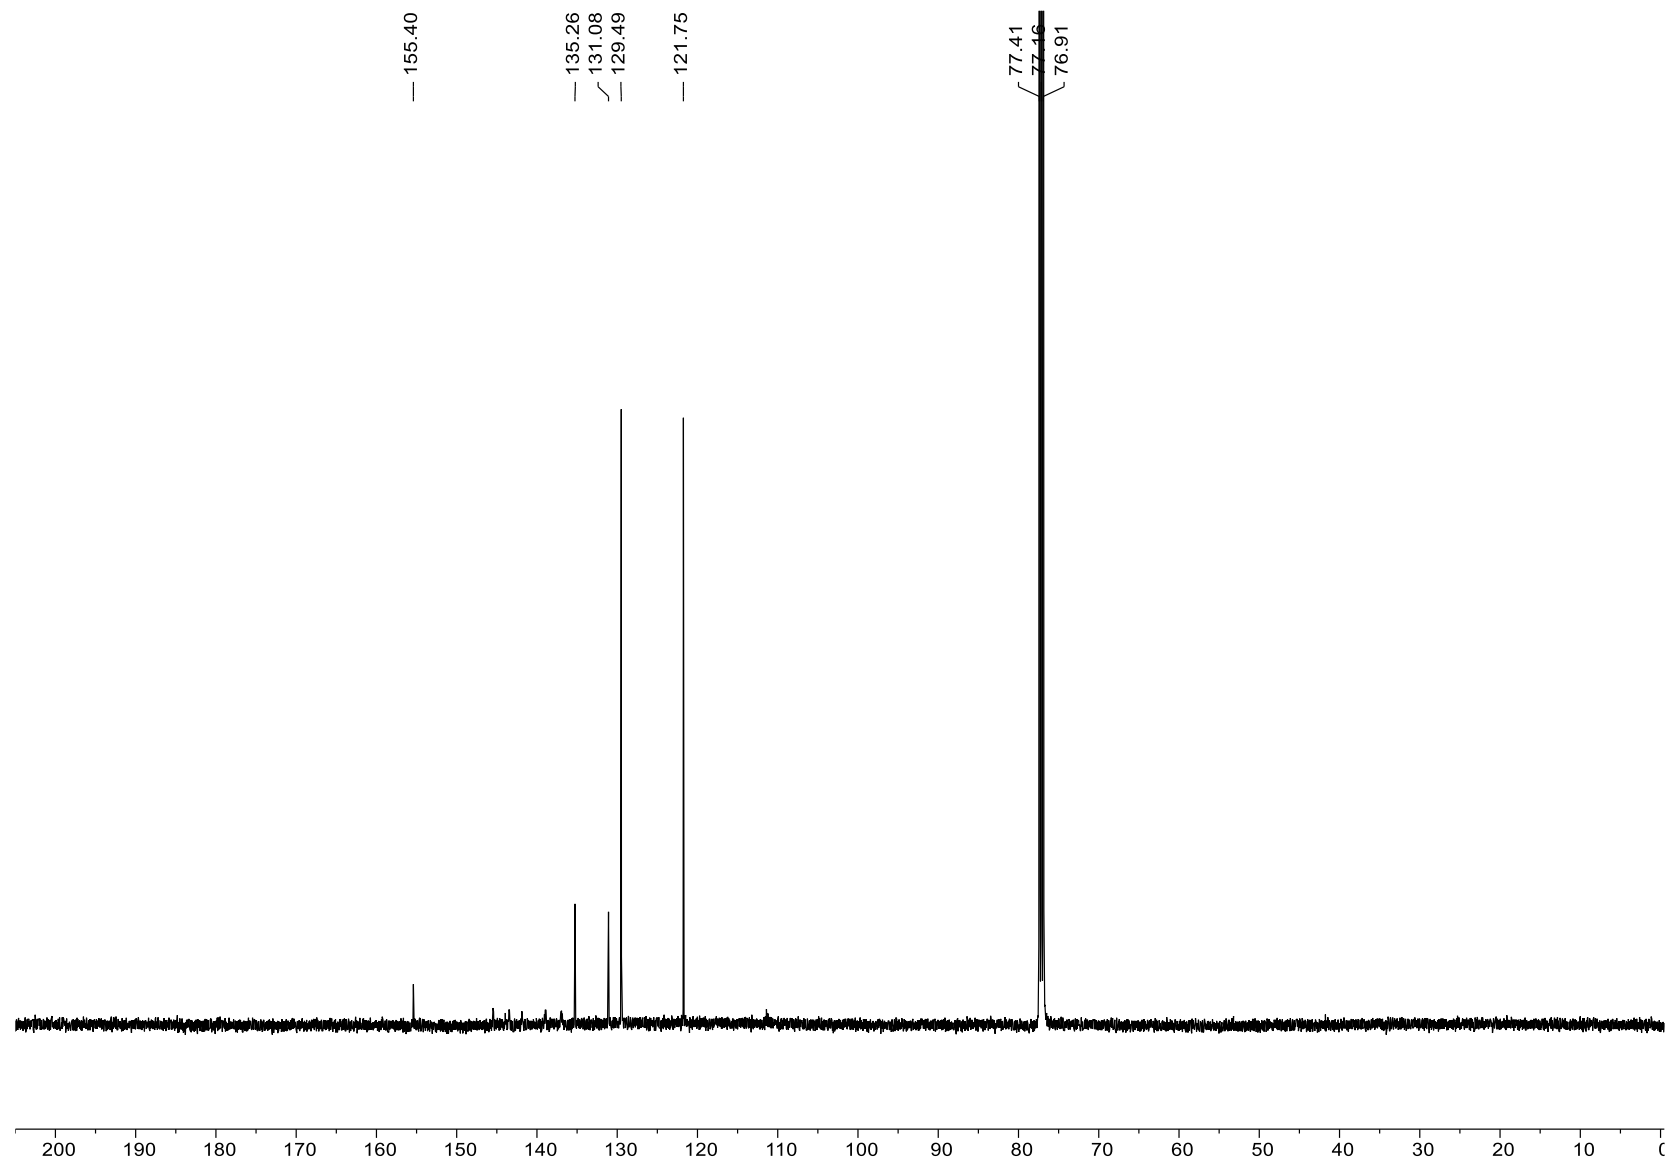

Figure S53:  $^{19}\text{F}$  NMR (471 MHz,  $\text{CDCl}_3$ , 298 K) of **3**.

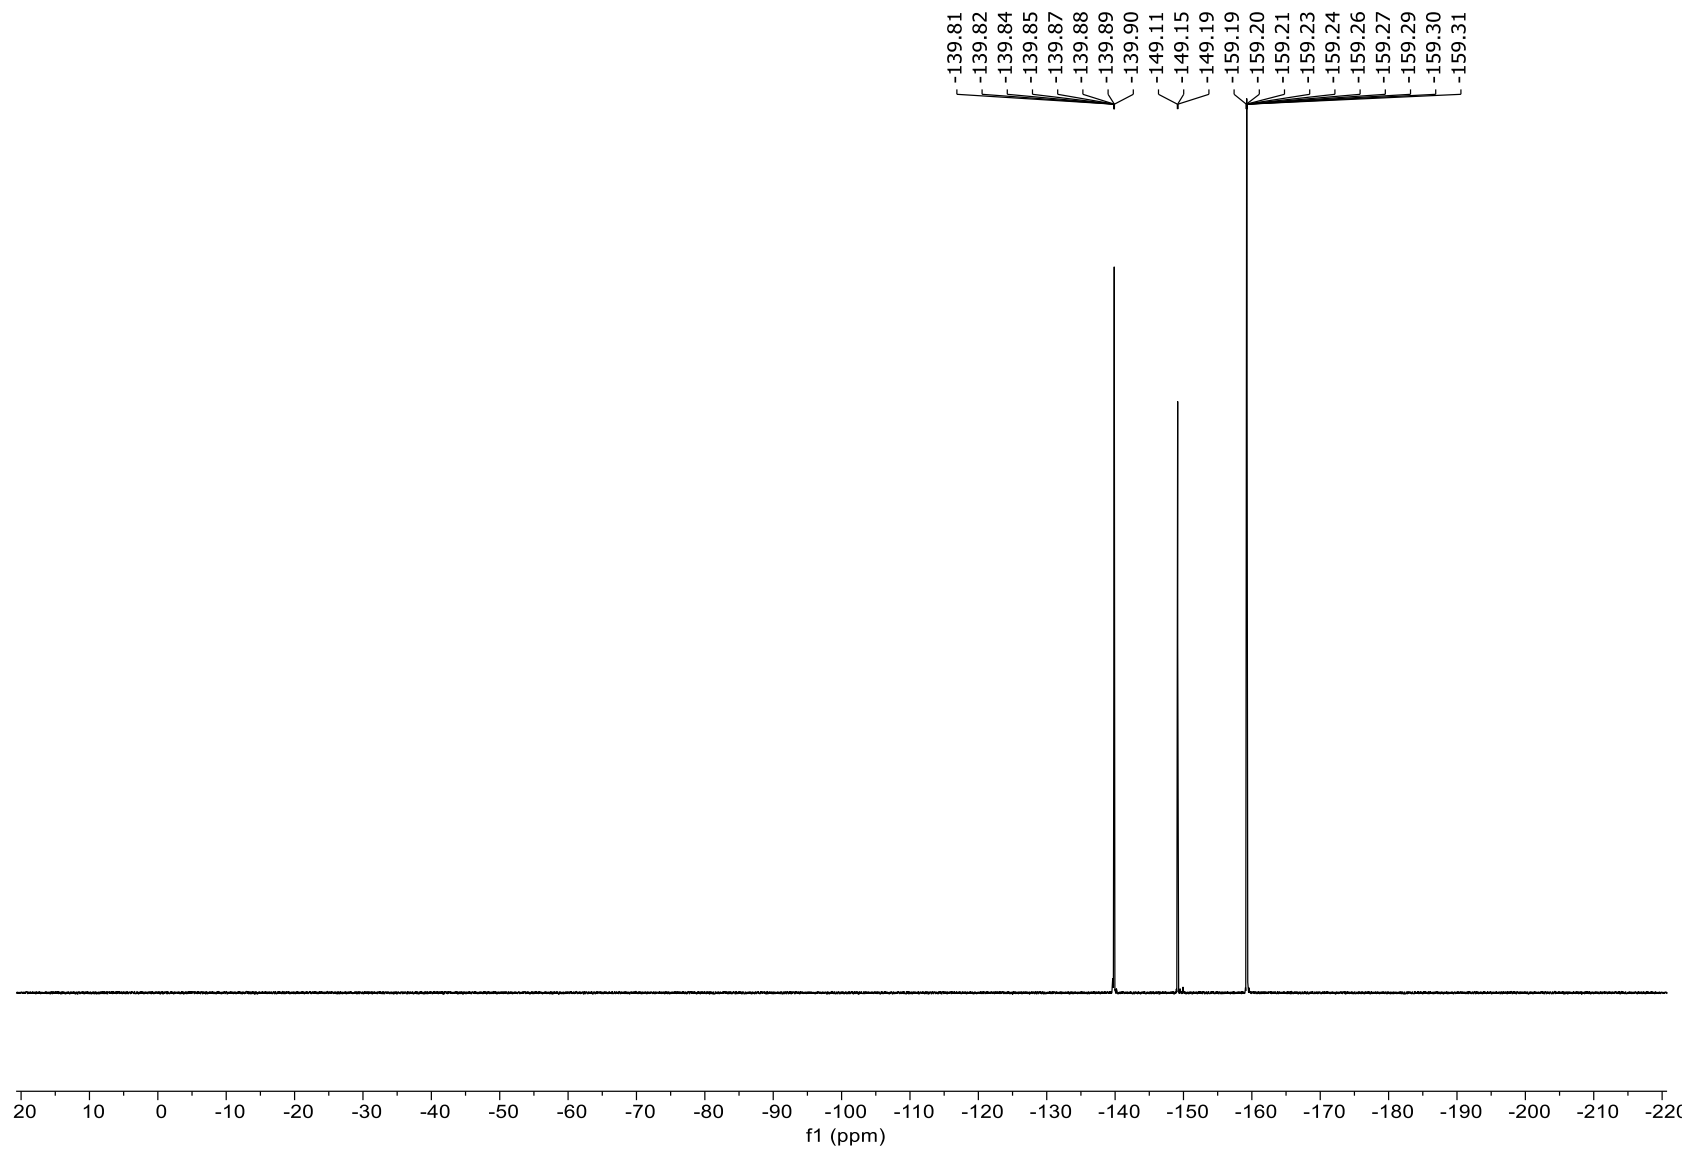

Figure S54:  $^1\text{H}$  NMR (500 MHz,  $\text{CDCl}_3$ , 298 K) spectrum of **4**.

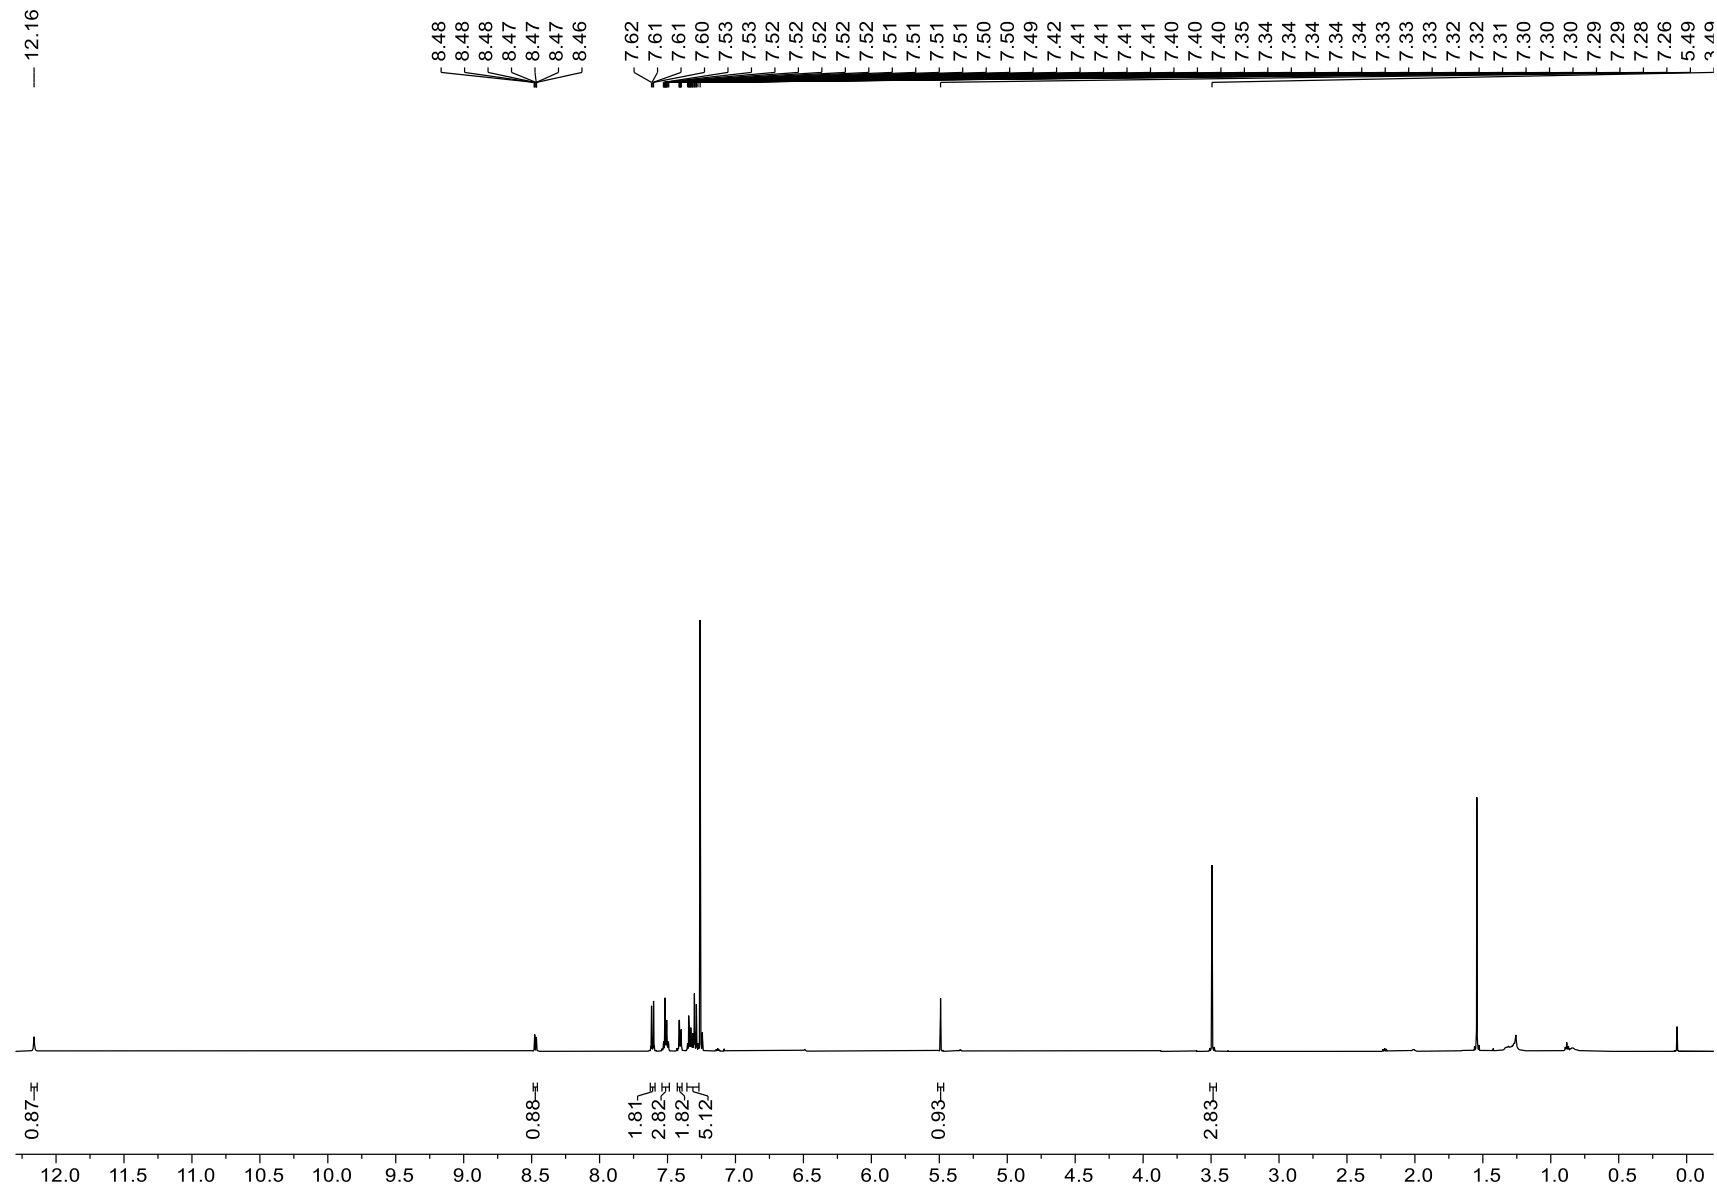

Figure S55:  $^{13}\text{C}$  NMR (126 MHz,  $\text{CDCl}_3$ , 298 K) spectrum of **4**.

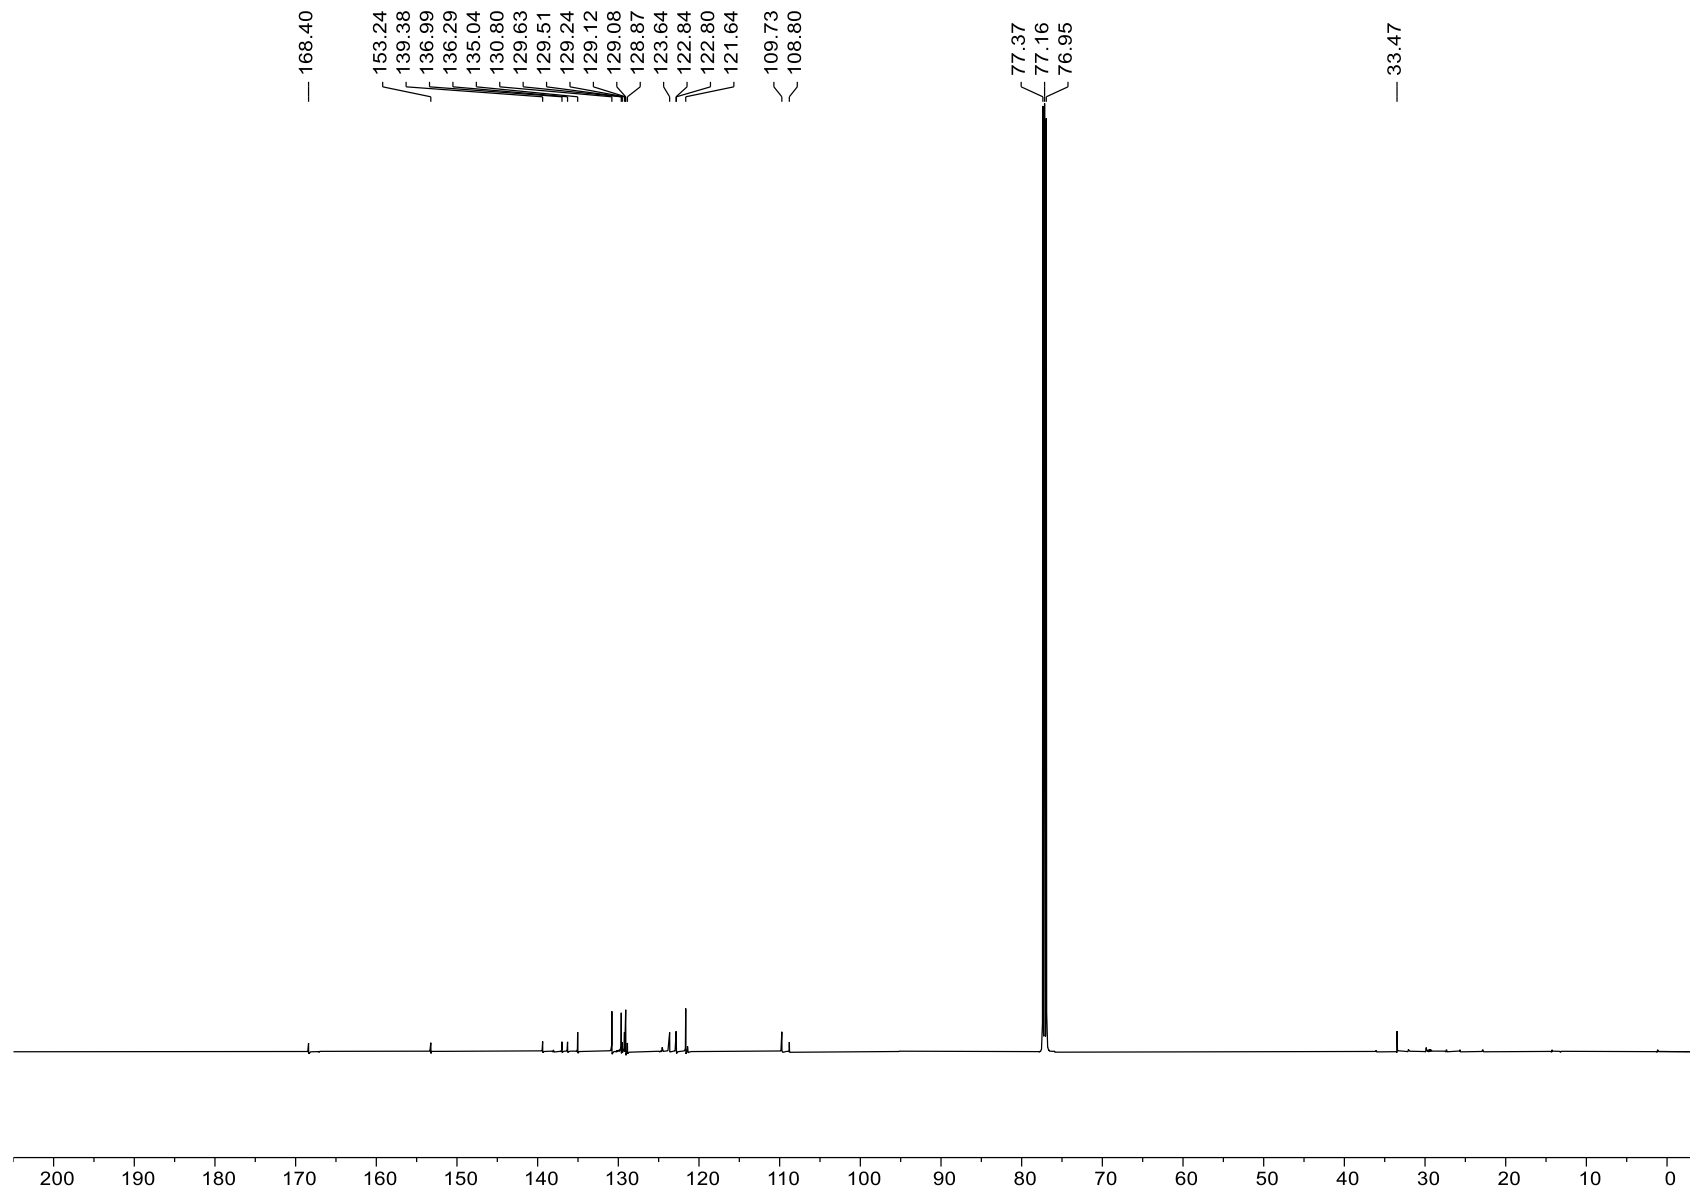

Figure S58:  $^1\text{H}$  NMR (500 MHz,  $\text{CDCl}_3$ , 298 K) spectrum of **5a**.

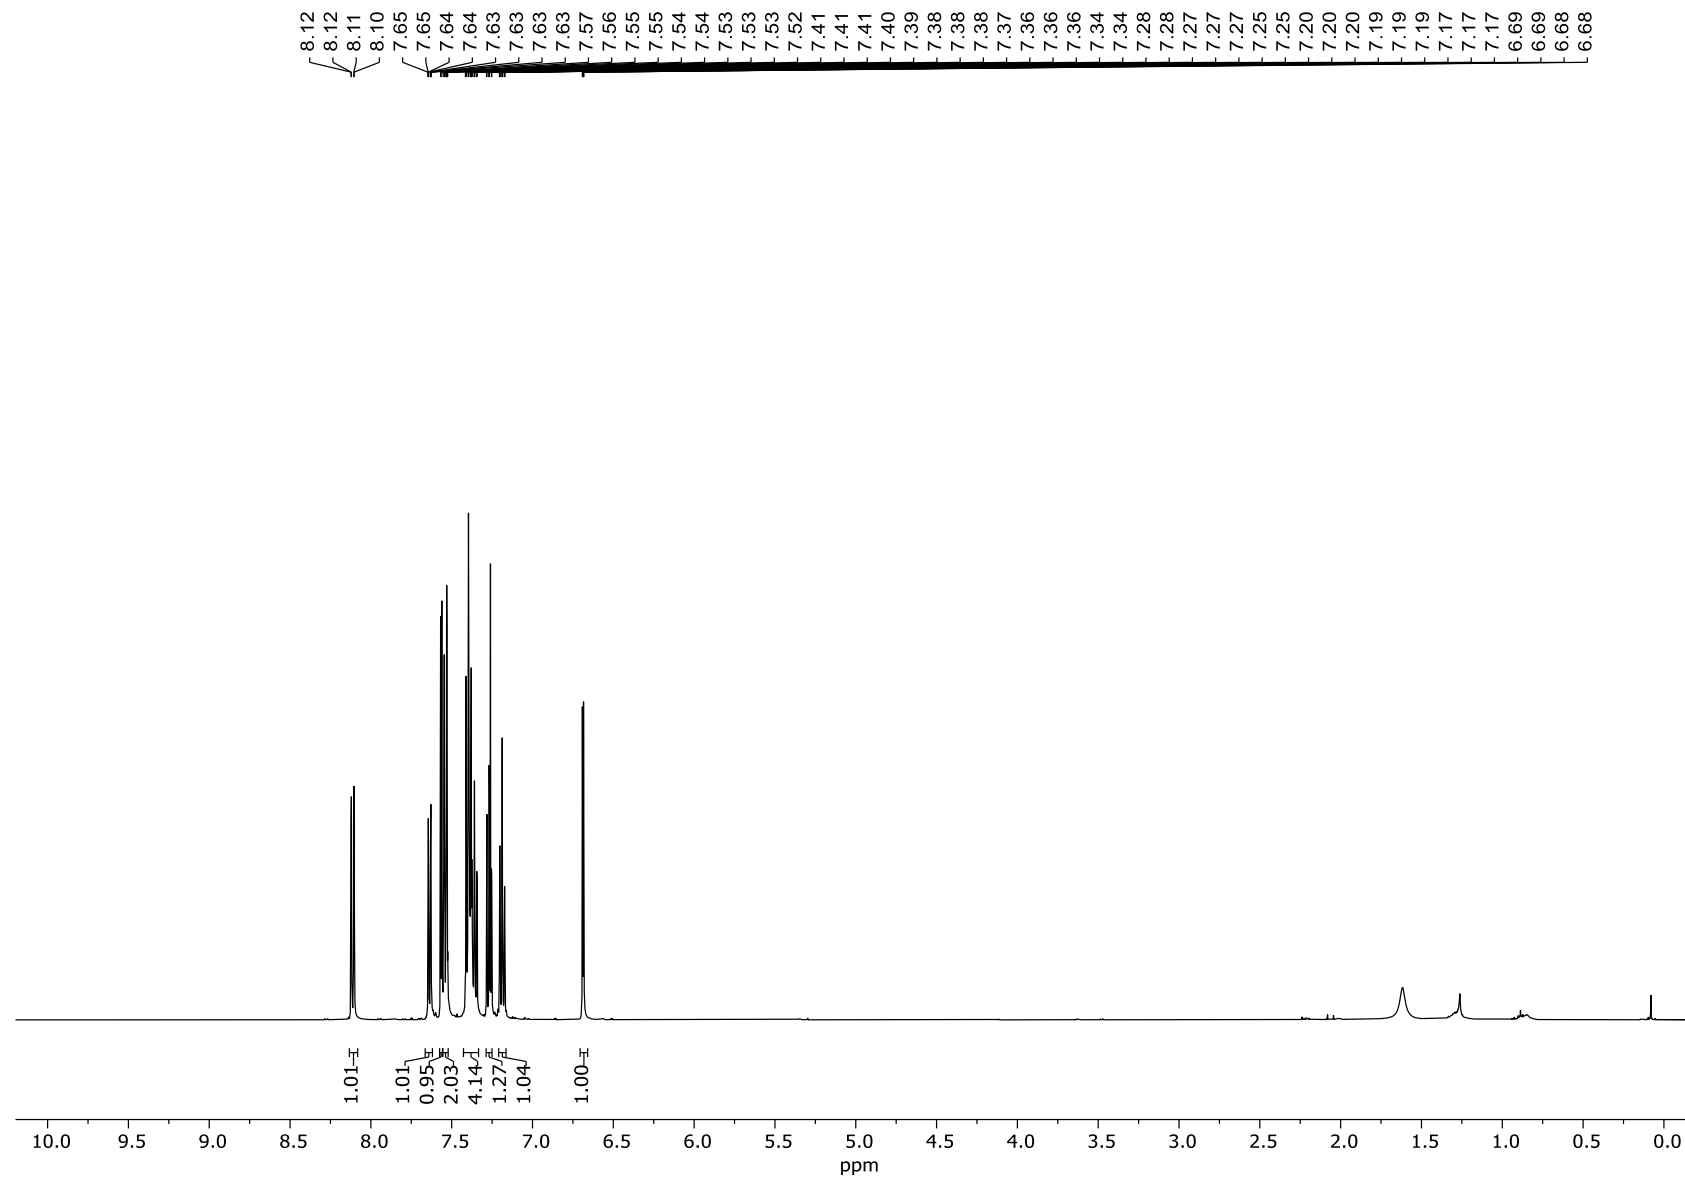

Figure S59:  $^{13}\text{C}$  NMR (126 MHz,  $\text{CDCl}_3$ , 298 K) spectrum of **5a**.

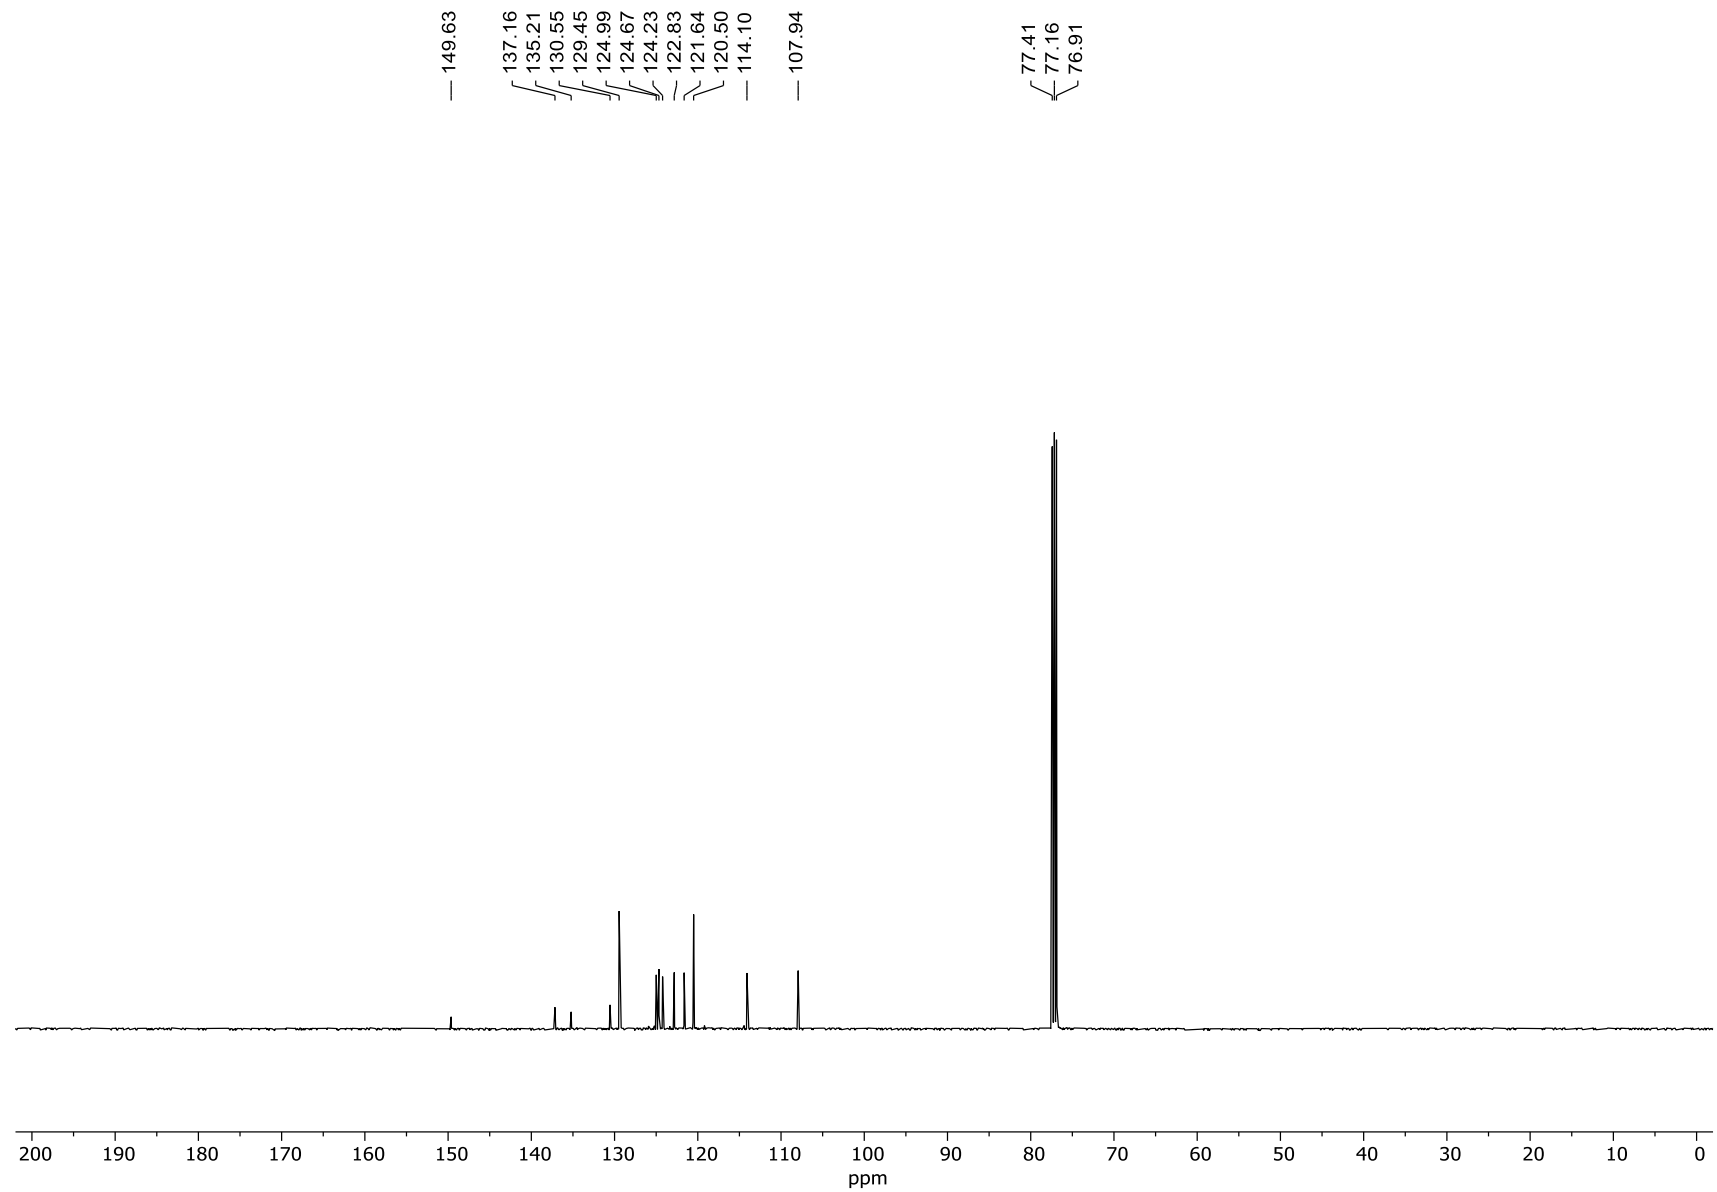

Figure S60:  $^1\text{H}$  NMR (500 MHz,  $\text{CDCl}_3$ , 298 K) spectrum of **5b**.

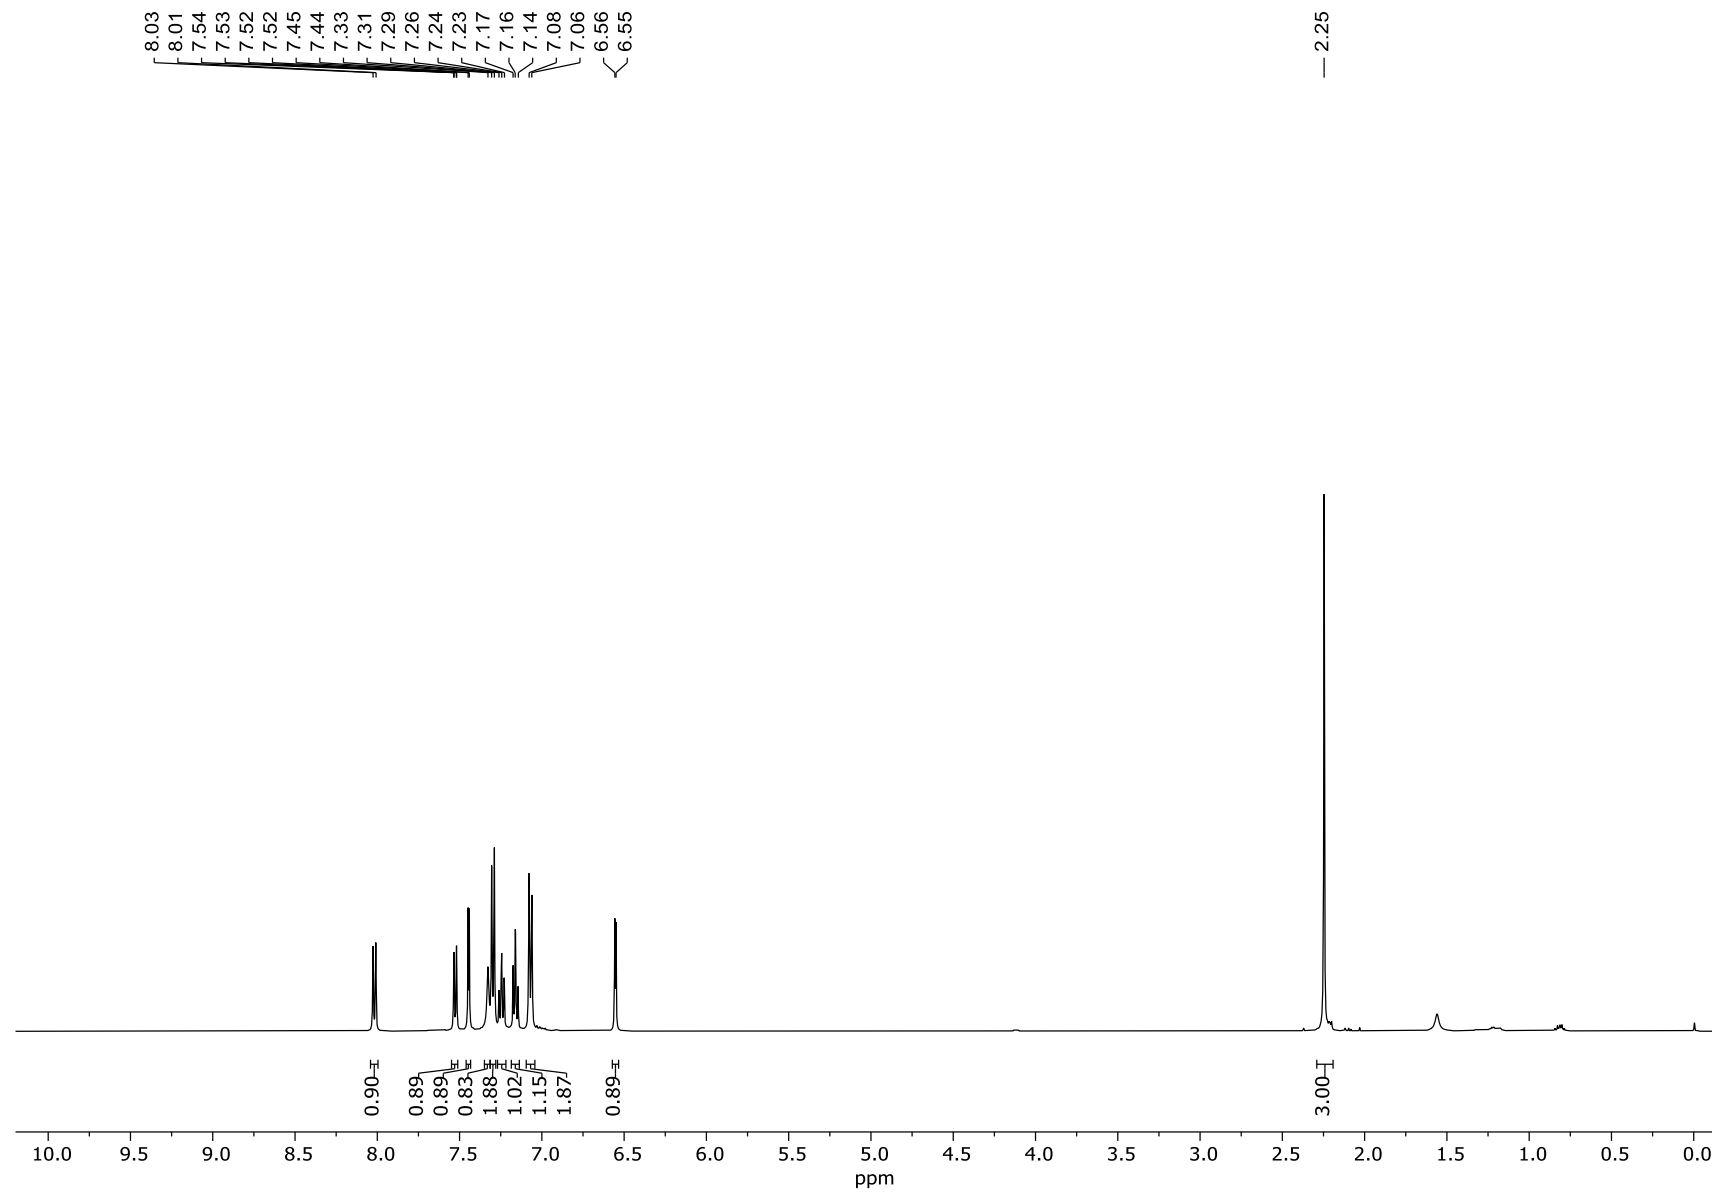

Figure S61:  $^{13}\text{C}$  NMR (126 MHz,  $\text{CDCl}_3$ , 298 K) spectrum of **5b**.

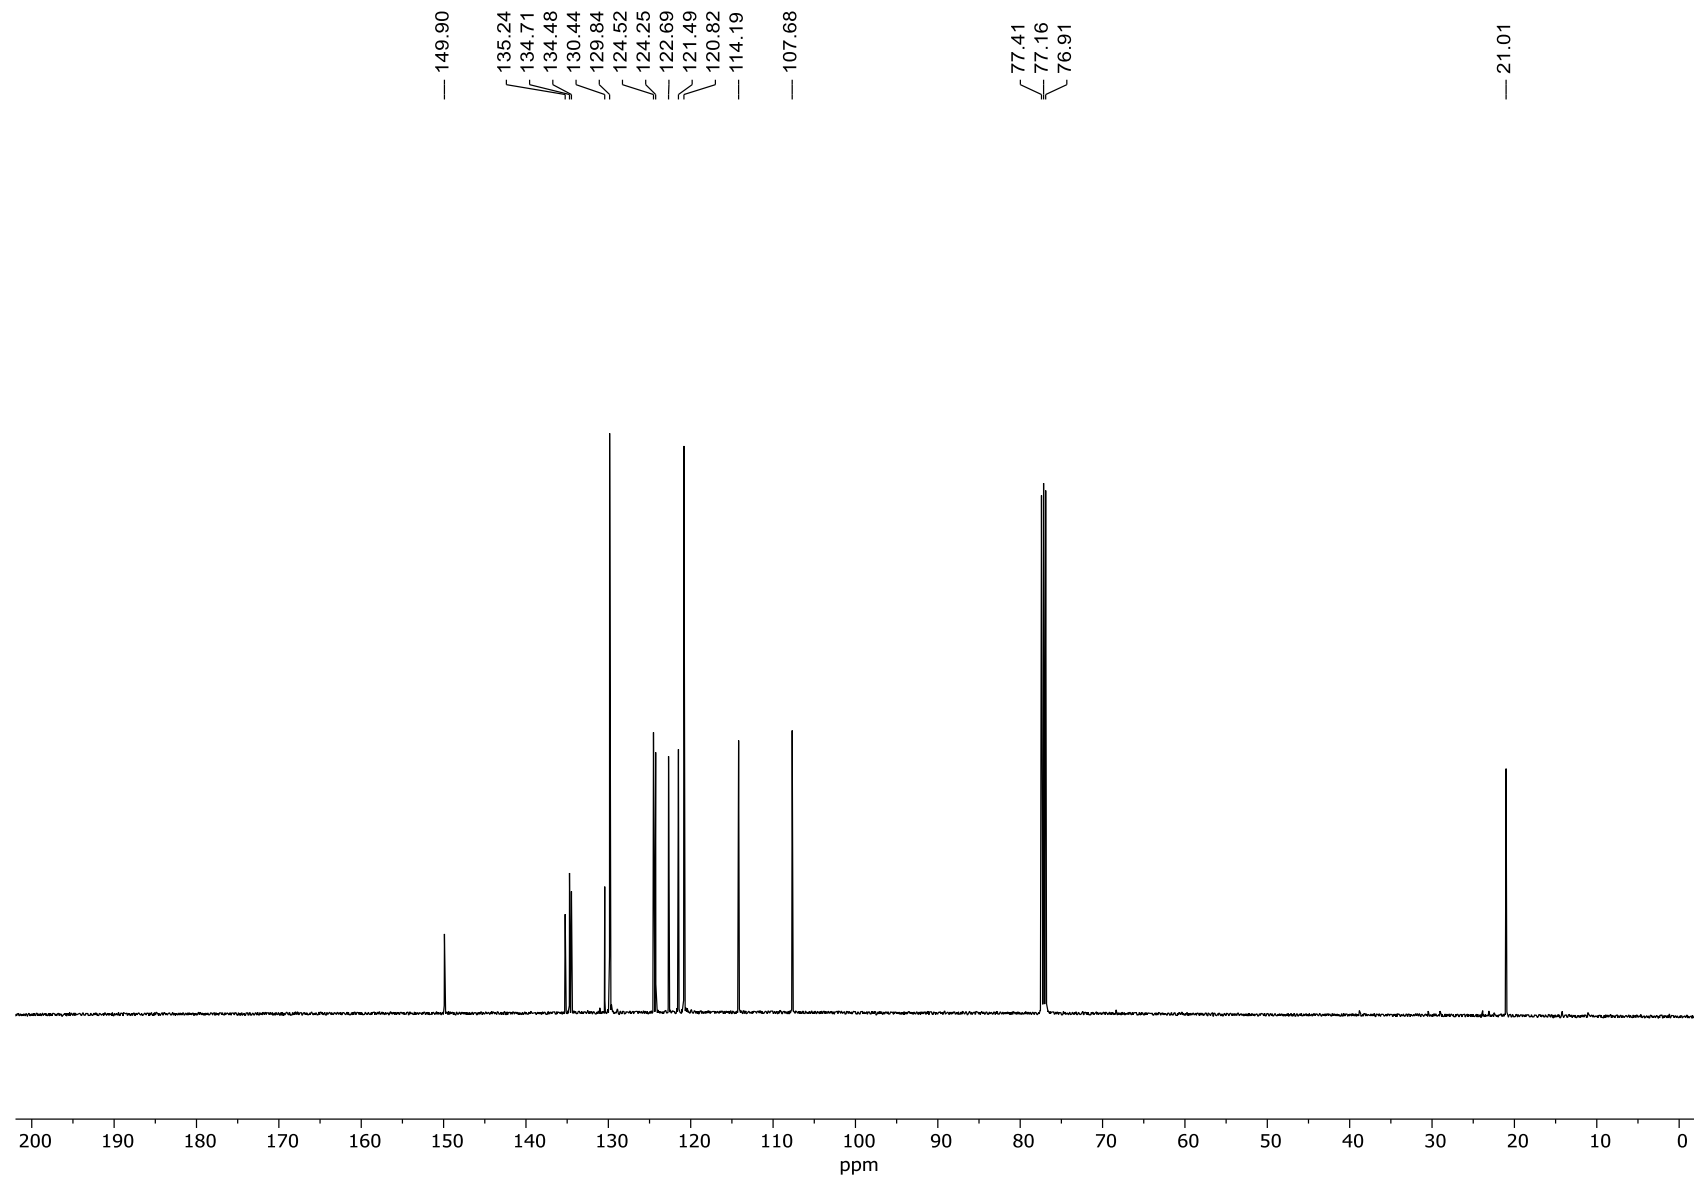



Figure S56:  $^1\text{H}$  NMR (500 MHz,  $\text{CDCl}_3$ , 298 K) spectrum of **5c**.

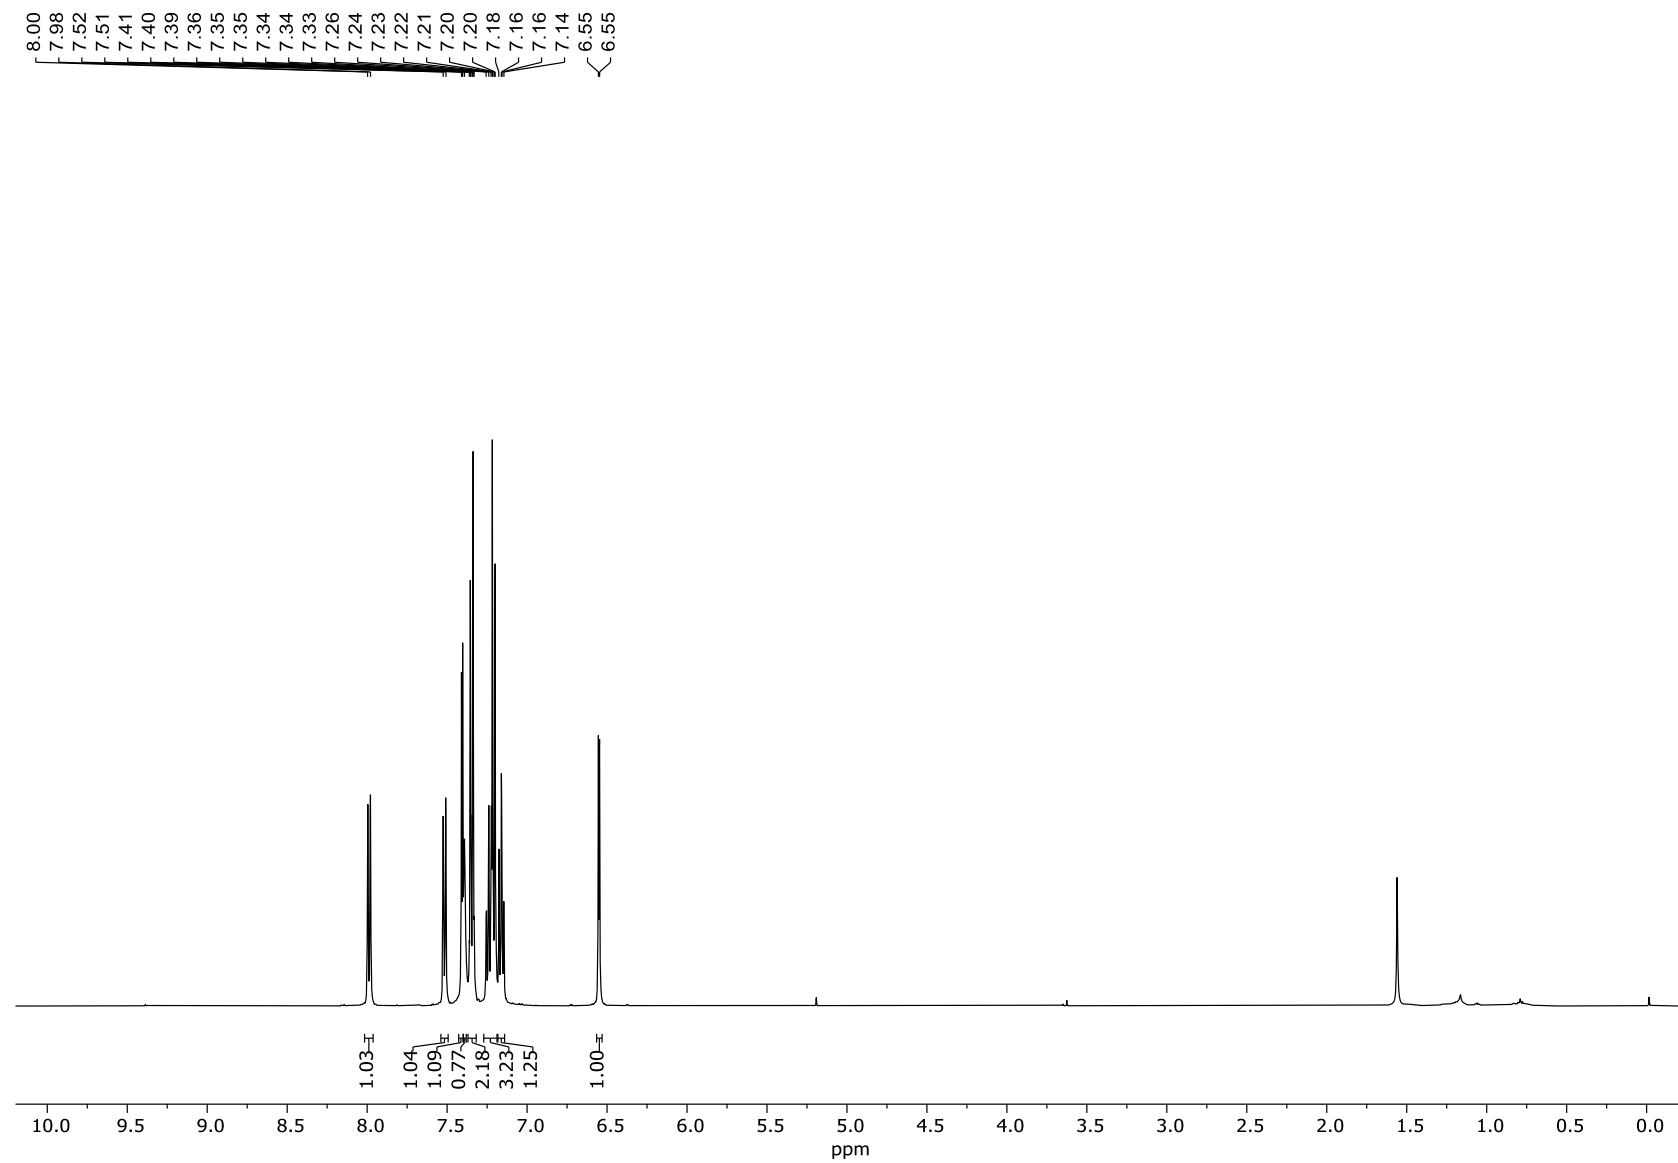

Figure S57:  $^{13}\text{C}$  NMR (126 MHz,  $\text{CDCl}_3$ , 298 K) spectrum of **5c**.

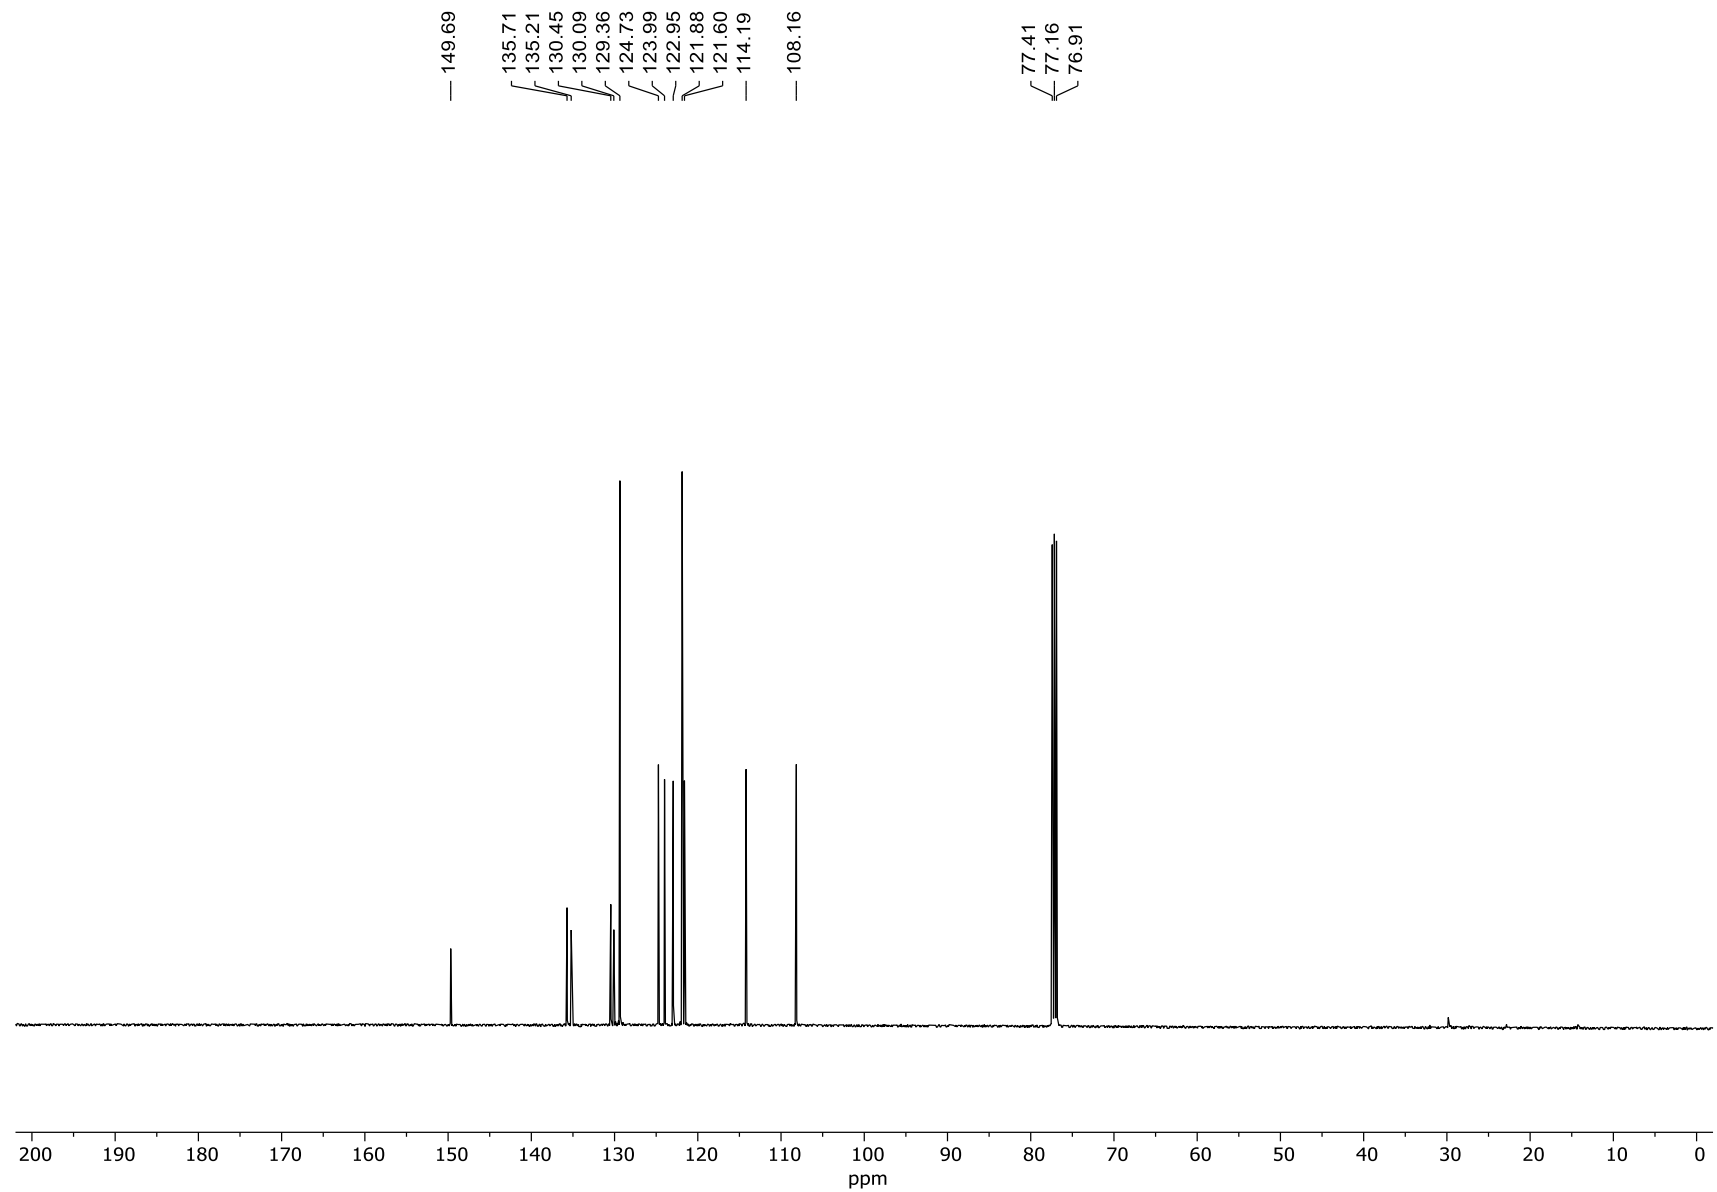

Figure S62:  $^1\text{H}$  NMR (500 MHz,  $\text{CDCl}_3$ , 298 K) spectrum of **5d**.

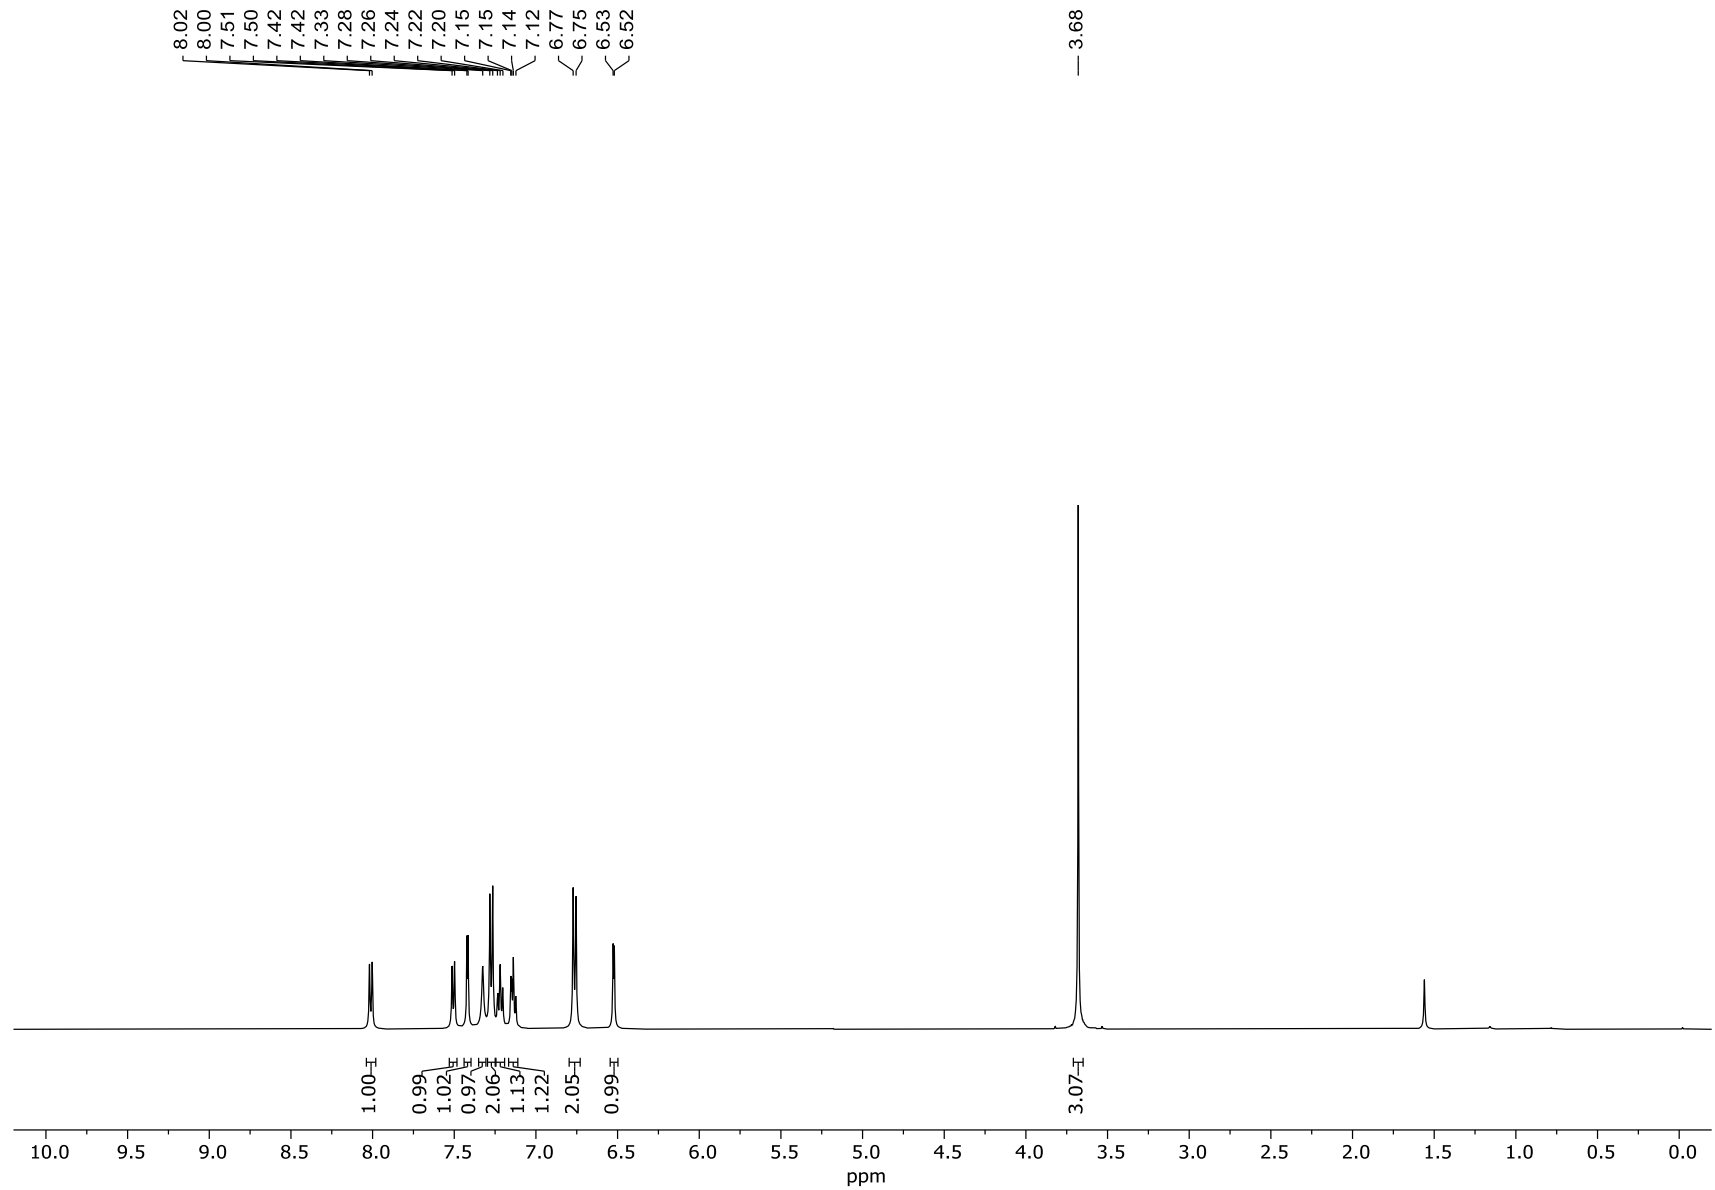

Figure S63:  $^{13}\text{C}$  NMR (126 MHz,  $\text{CDCl}_3$ , 298 K) spectrum of **5d**.

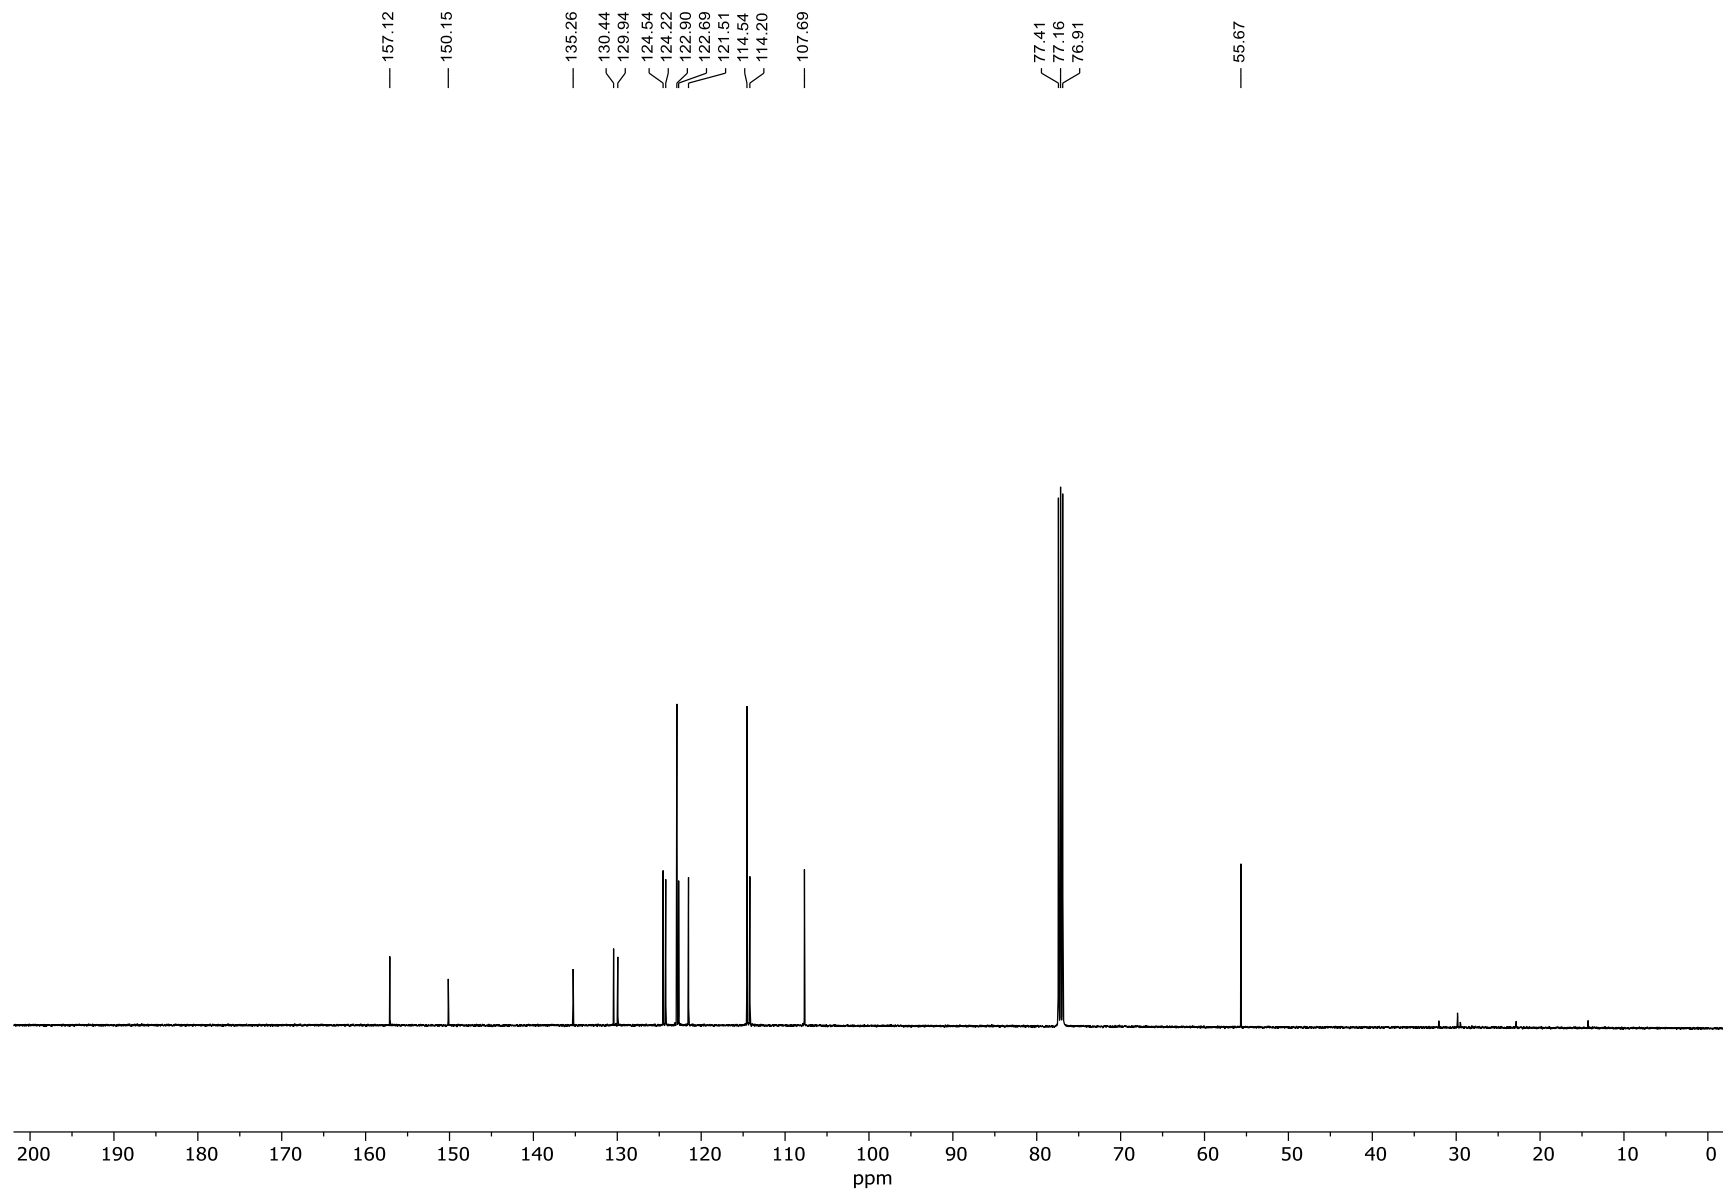

Figure S64:  $^1\text{H}$  NMR (500 MHz,  $\text{CDCl}_3$ , 298 K) spectrum of **5e**.

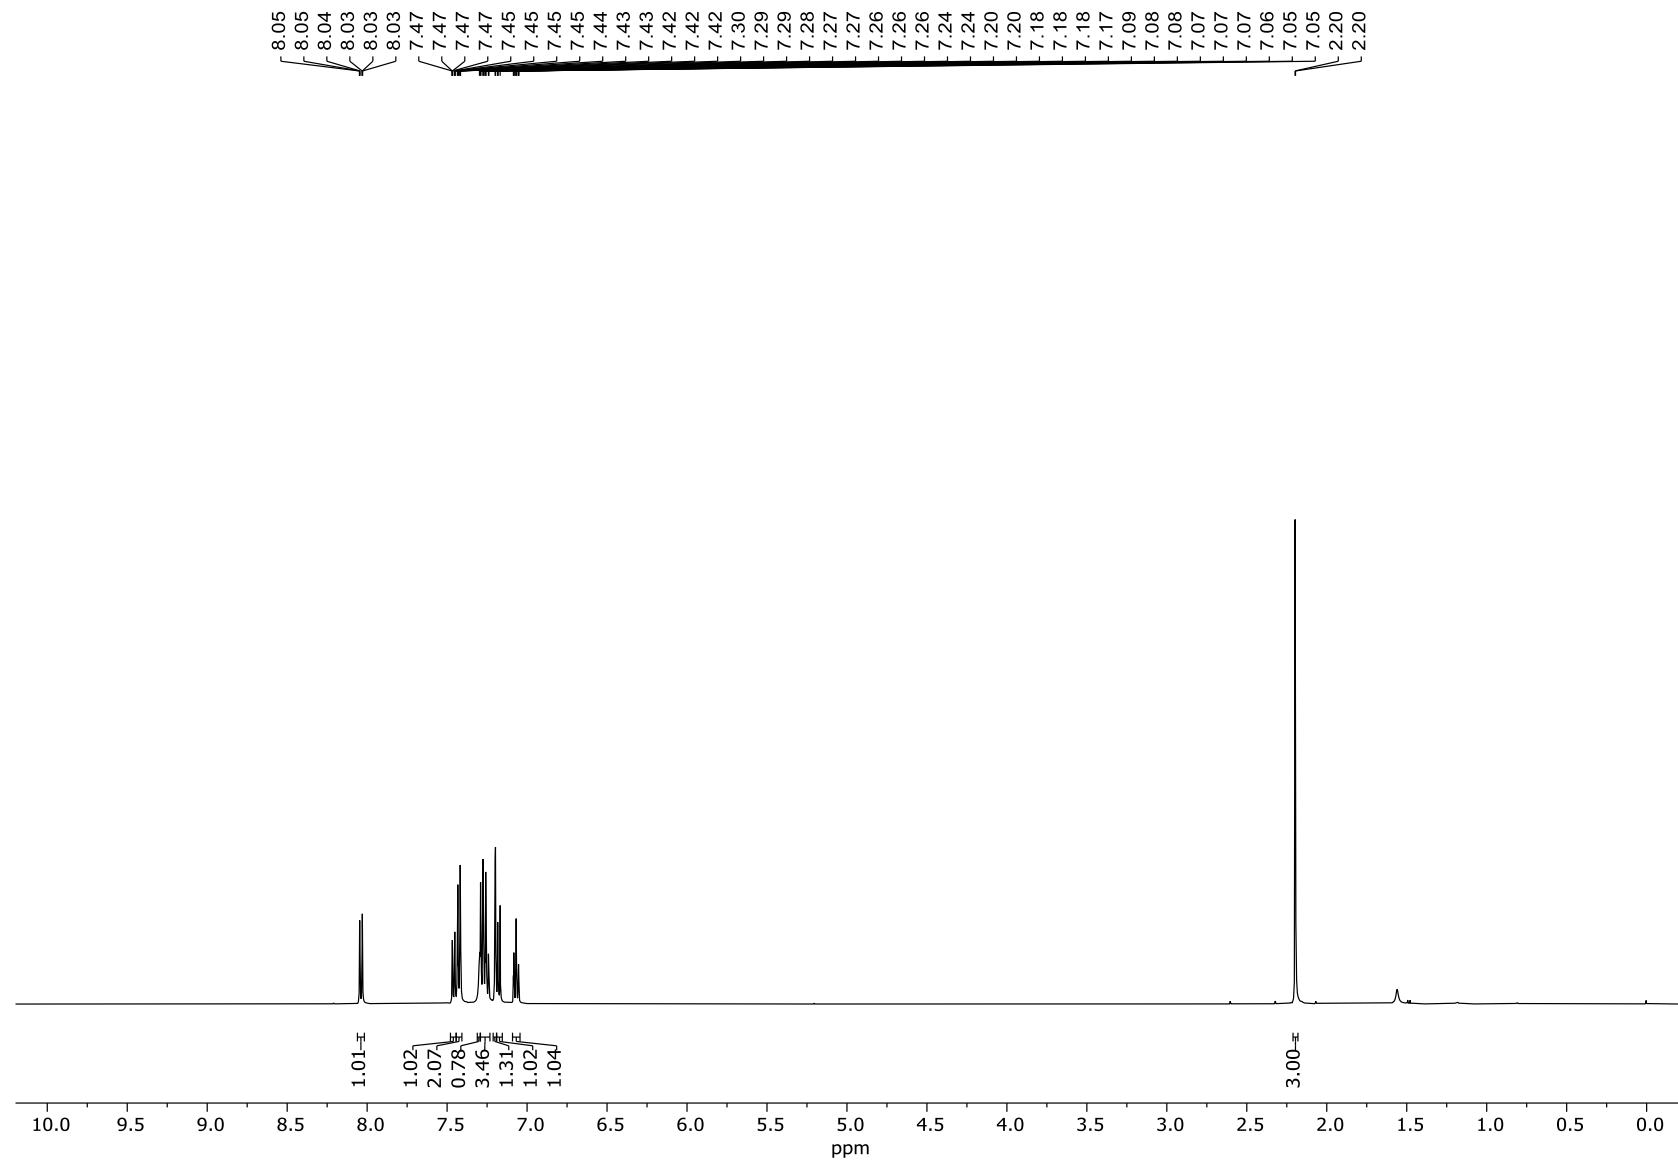

Figure S65:  $^{13}\text{C}$  NMR (126 MHz,  $\text{CDCl}_3$ , 298 K) spectrum of **5e**.

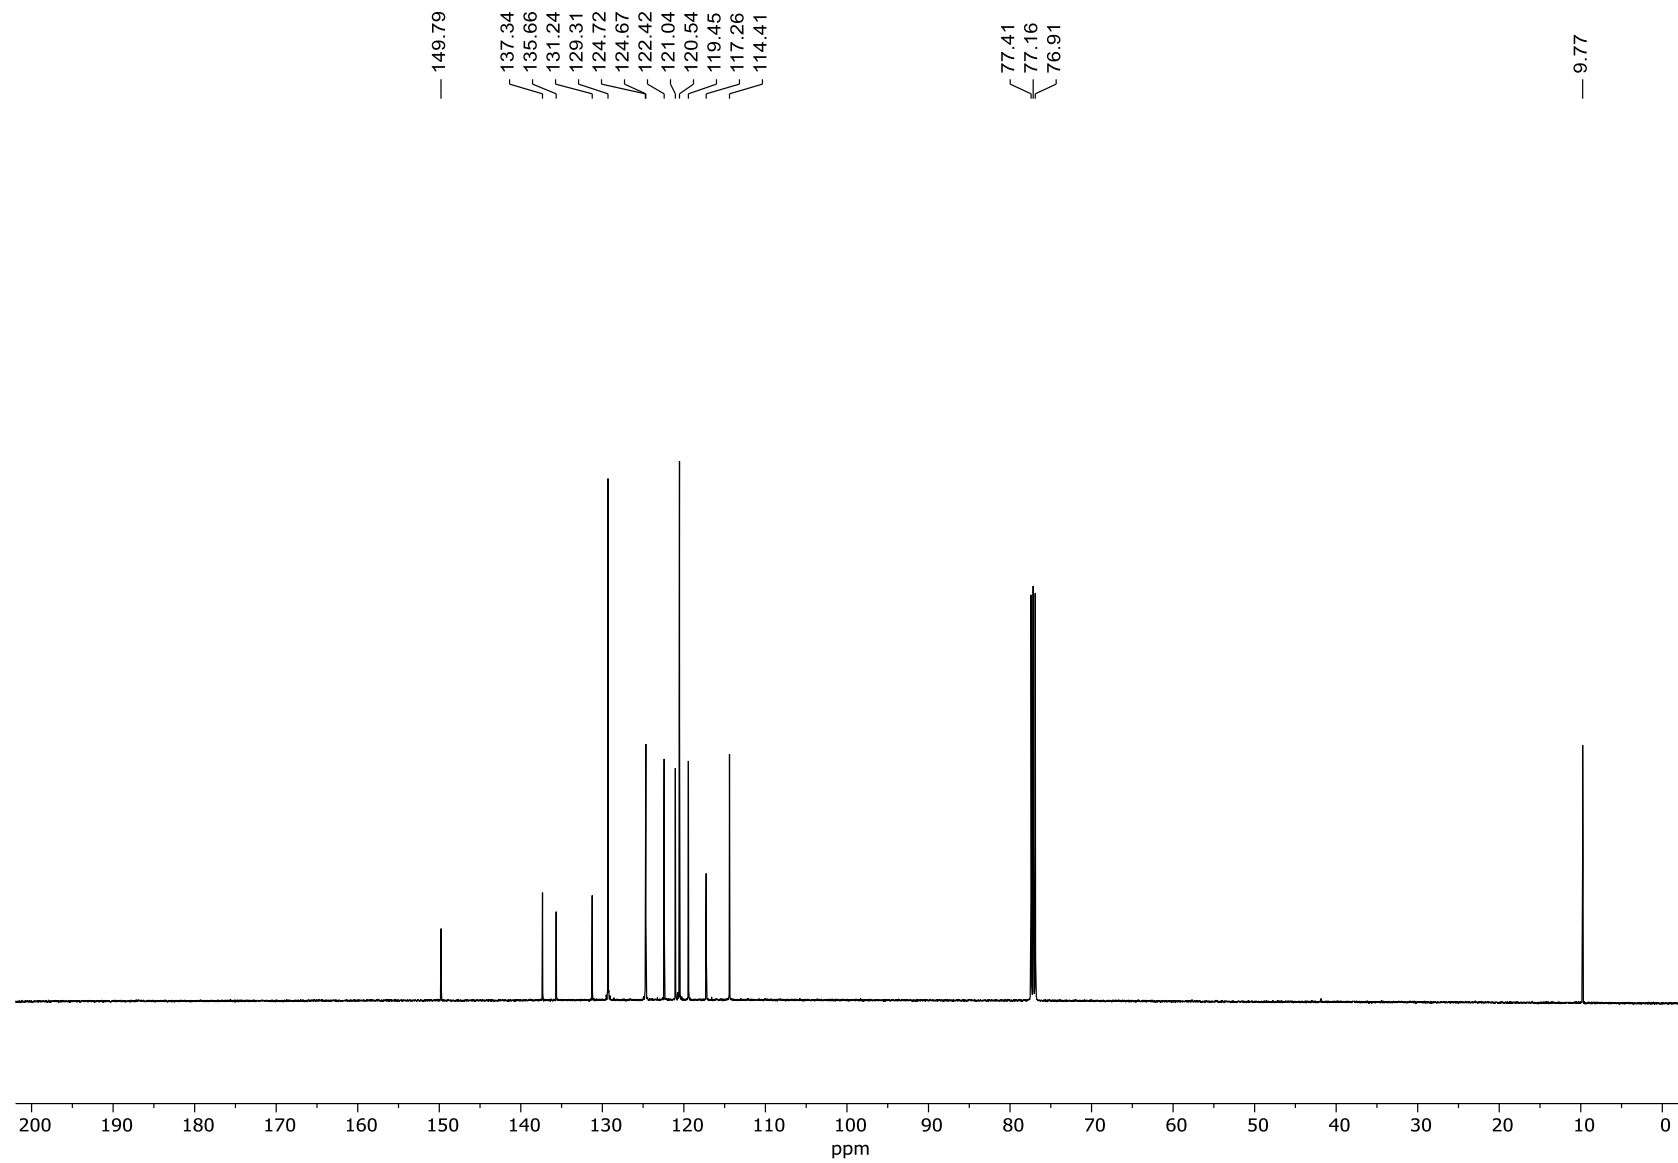

Figure S66:  $^1\text{H}$  NMR (500 MHz,  $\text{CDCl}_3$ , 298 K) spectrum of **5f**.

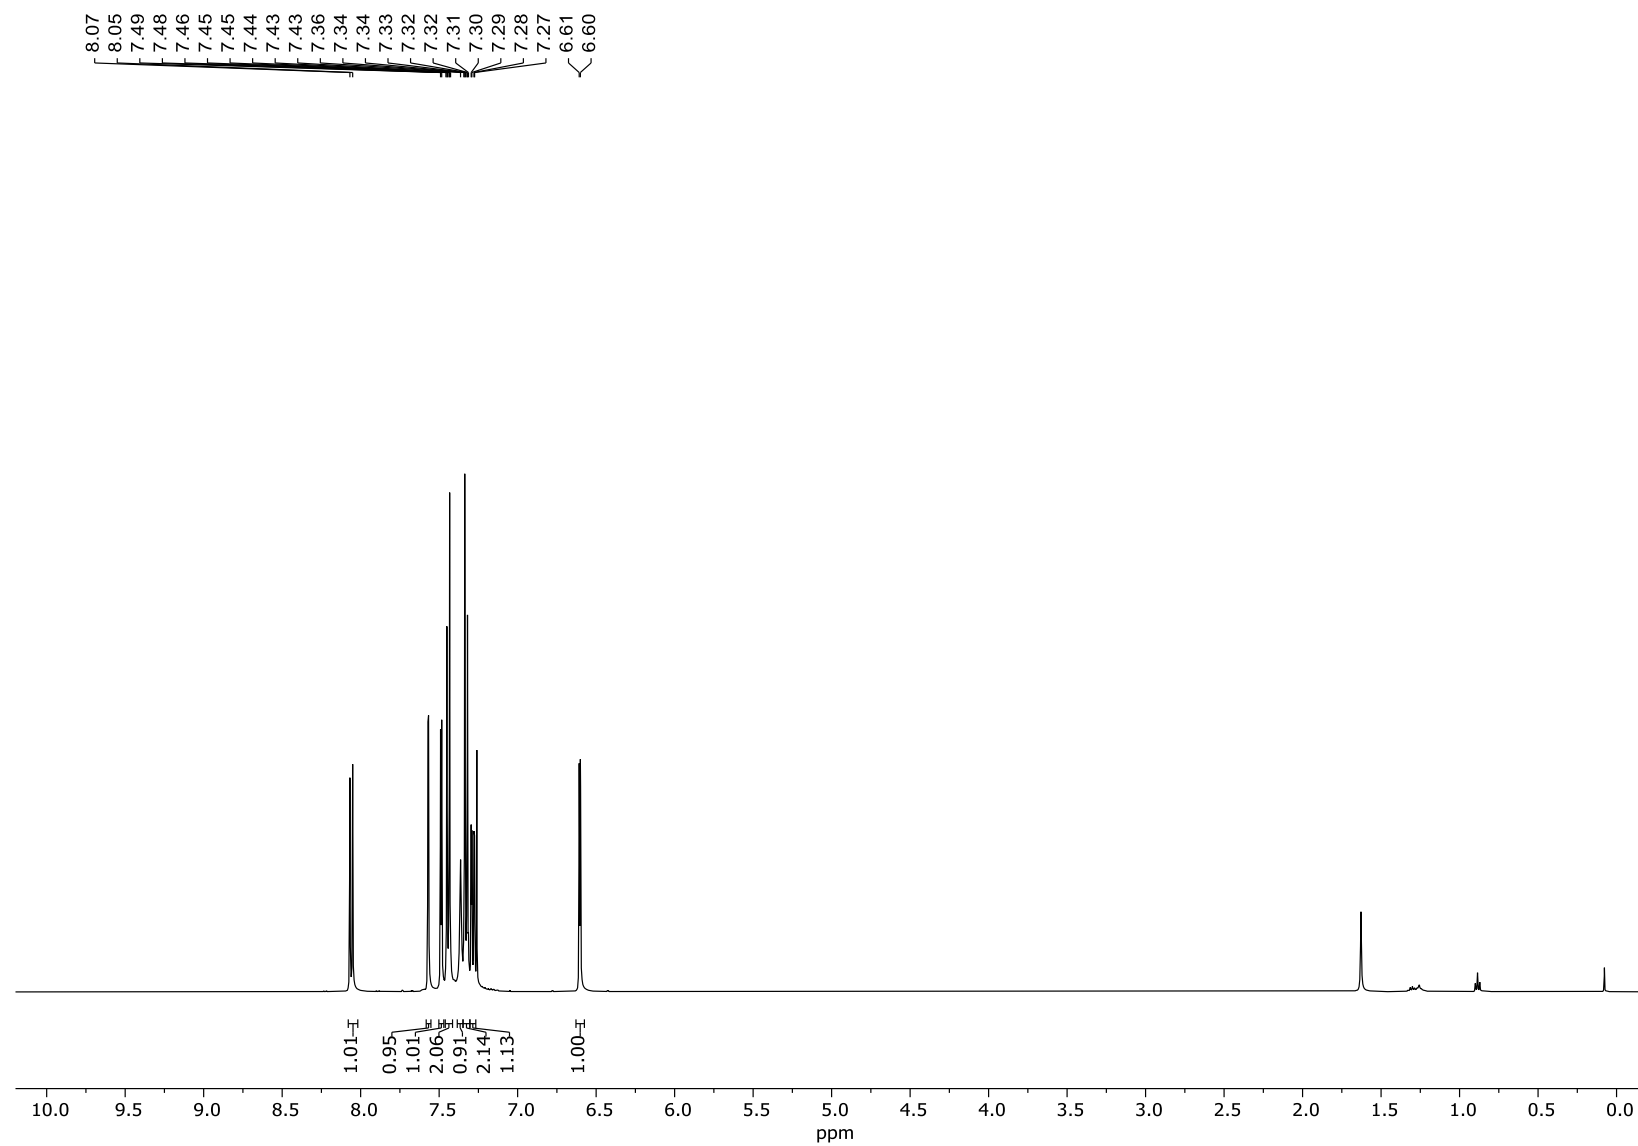

Figure S67:  $^{13}\text{C}$  NMR (126 MHz,  $\text{CDCl}_3$ , 298 K) spectrum of **5f**.

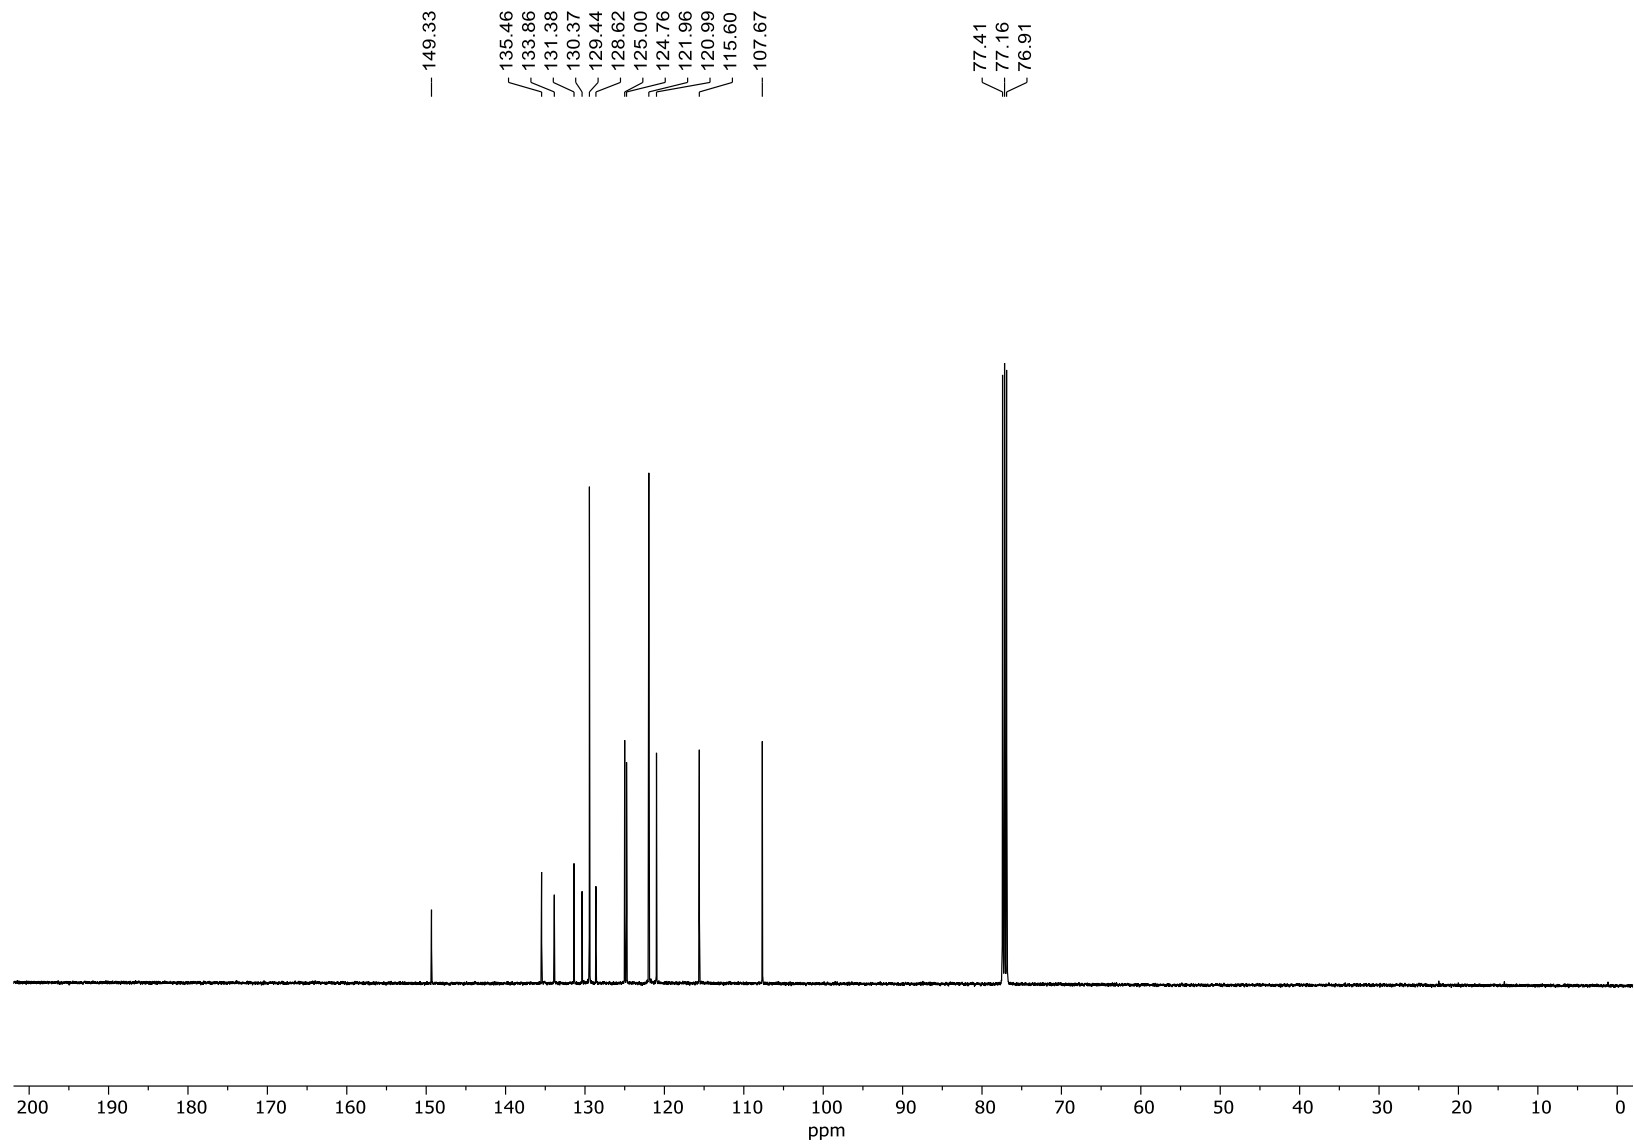



Figure S68:  $^1\text{H}$  NMR (500 MHz,  $\text{CDCl}_3$ , 298 K) spectrum of **5g**.

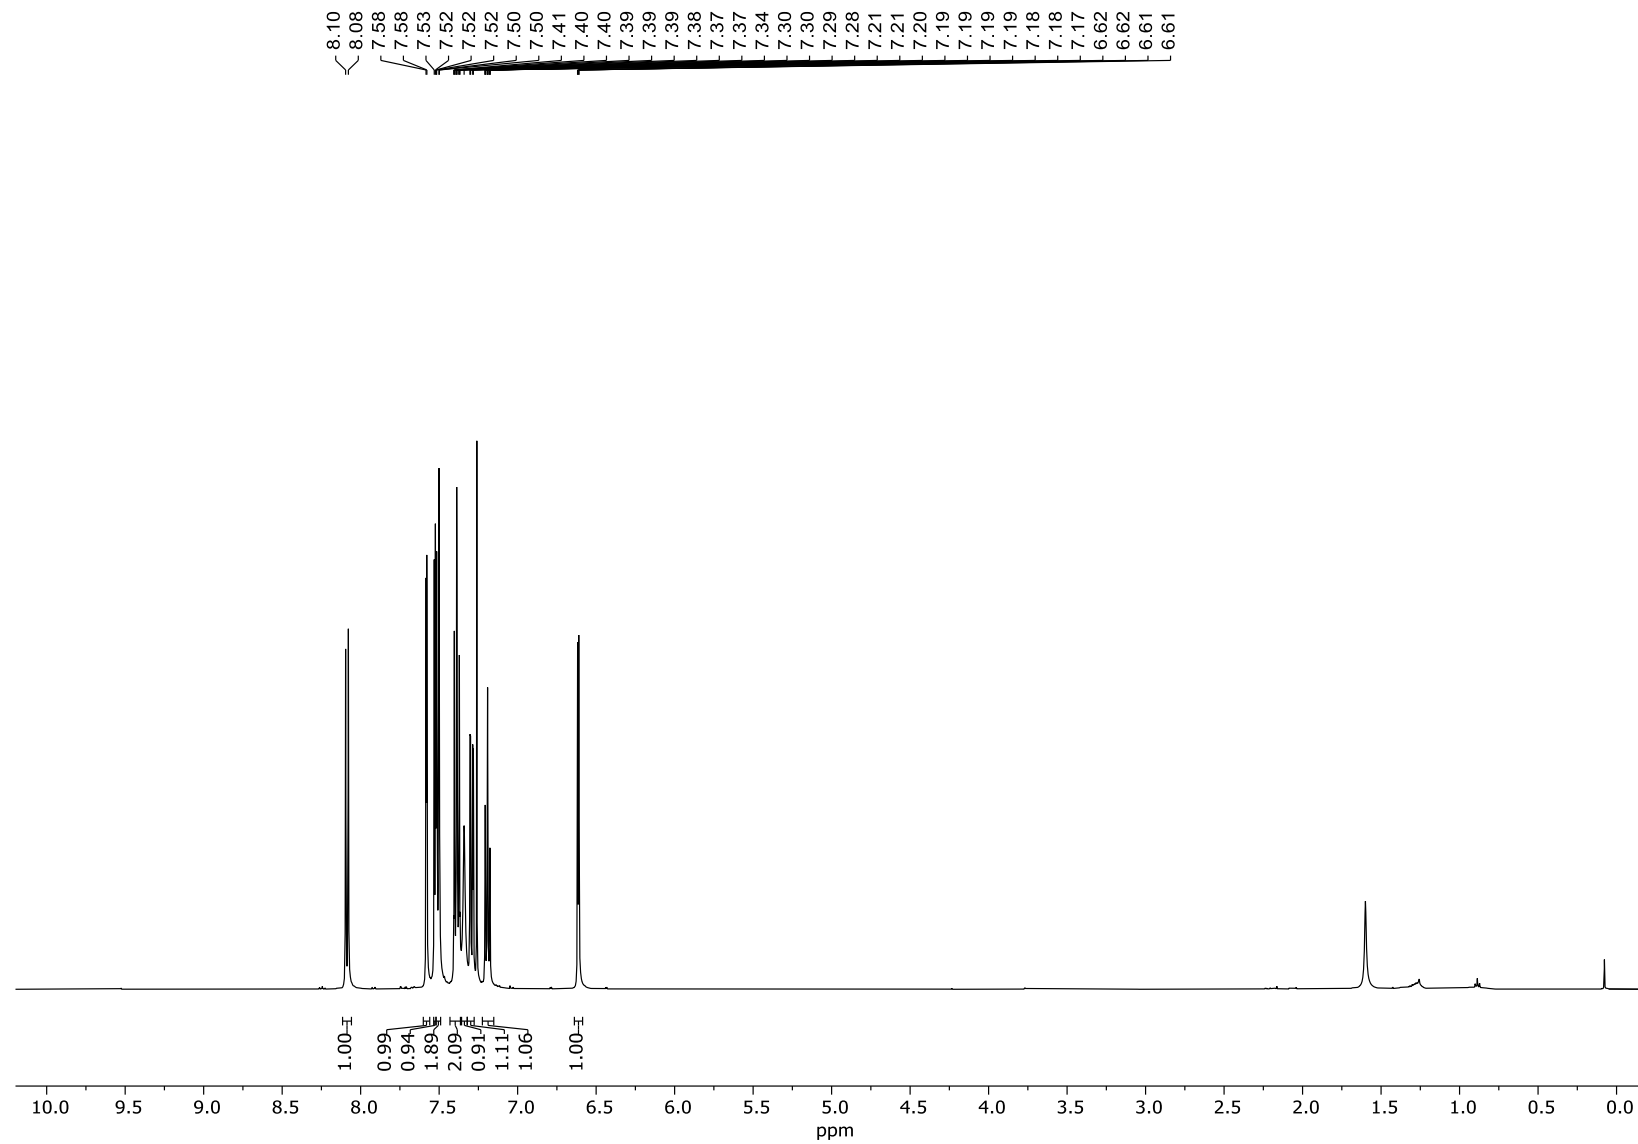

Figure S69:  $^{13}\text{C}$  NMR (126 MHz,  $\text{CDCl}_3$ , 298 K) spectrum of **5g**.

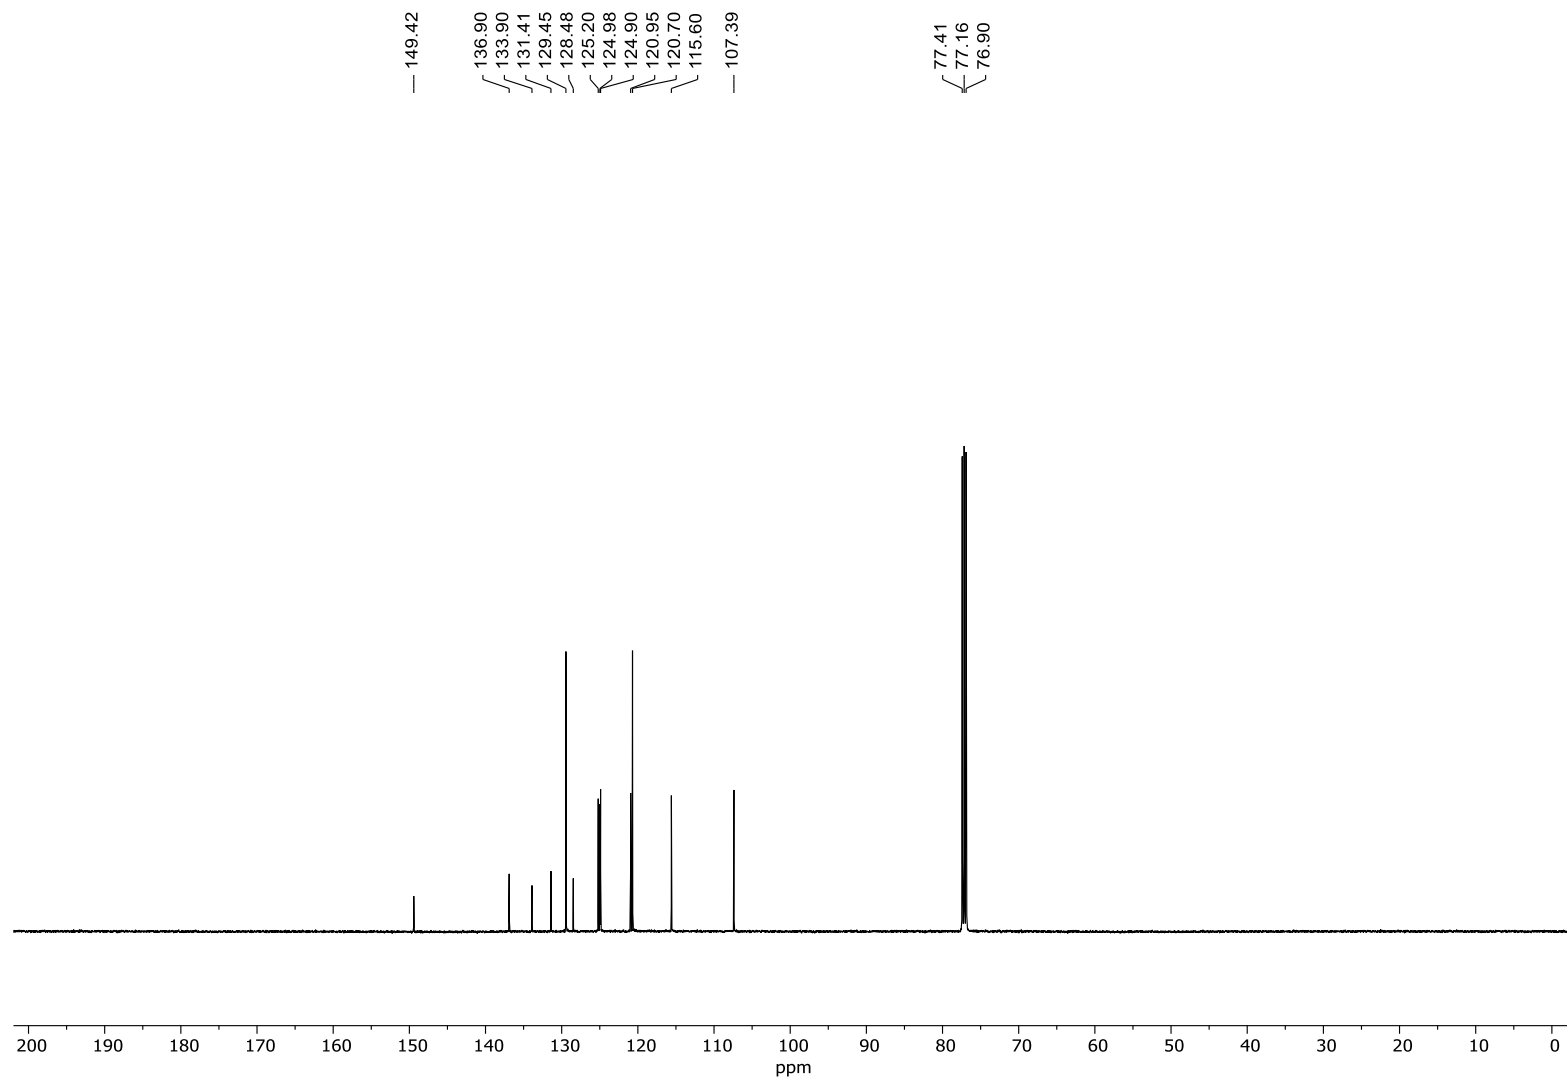

Figure S70:  $^1\text{H}$  NMR (500 MHz,  $\text{CDCl}_3$ , 298 K) spectrum of **5h**.

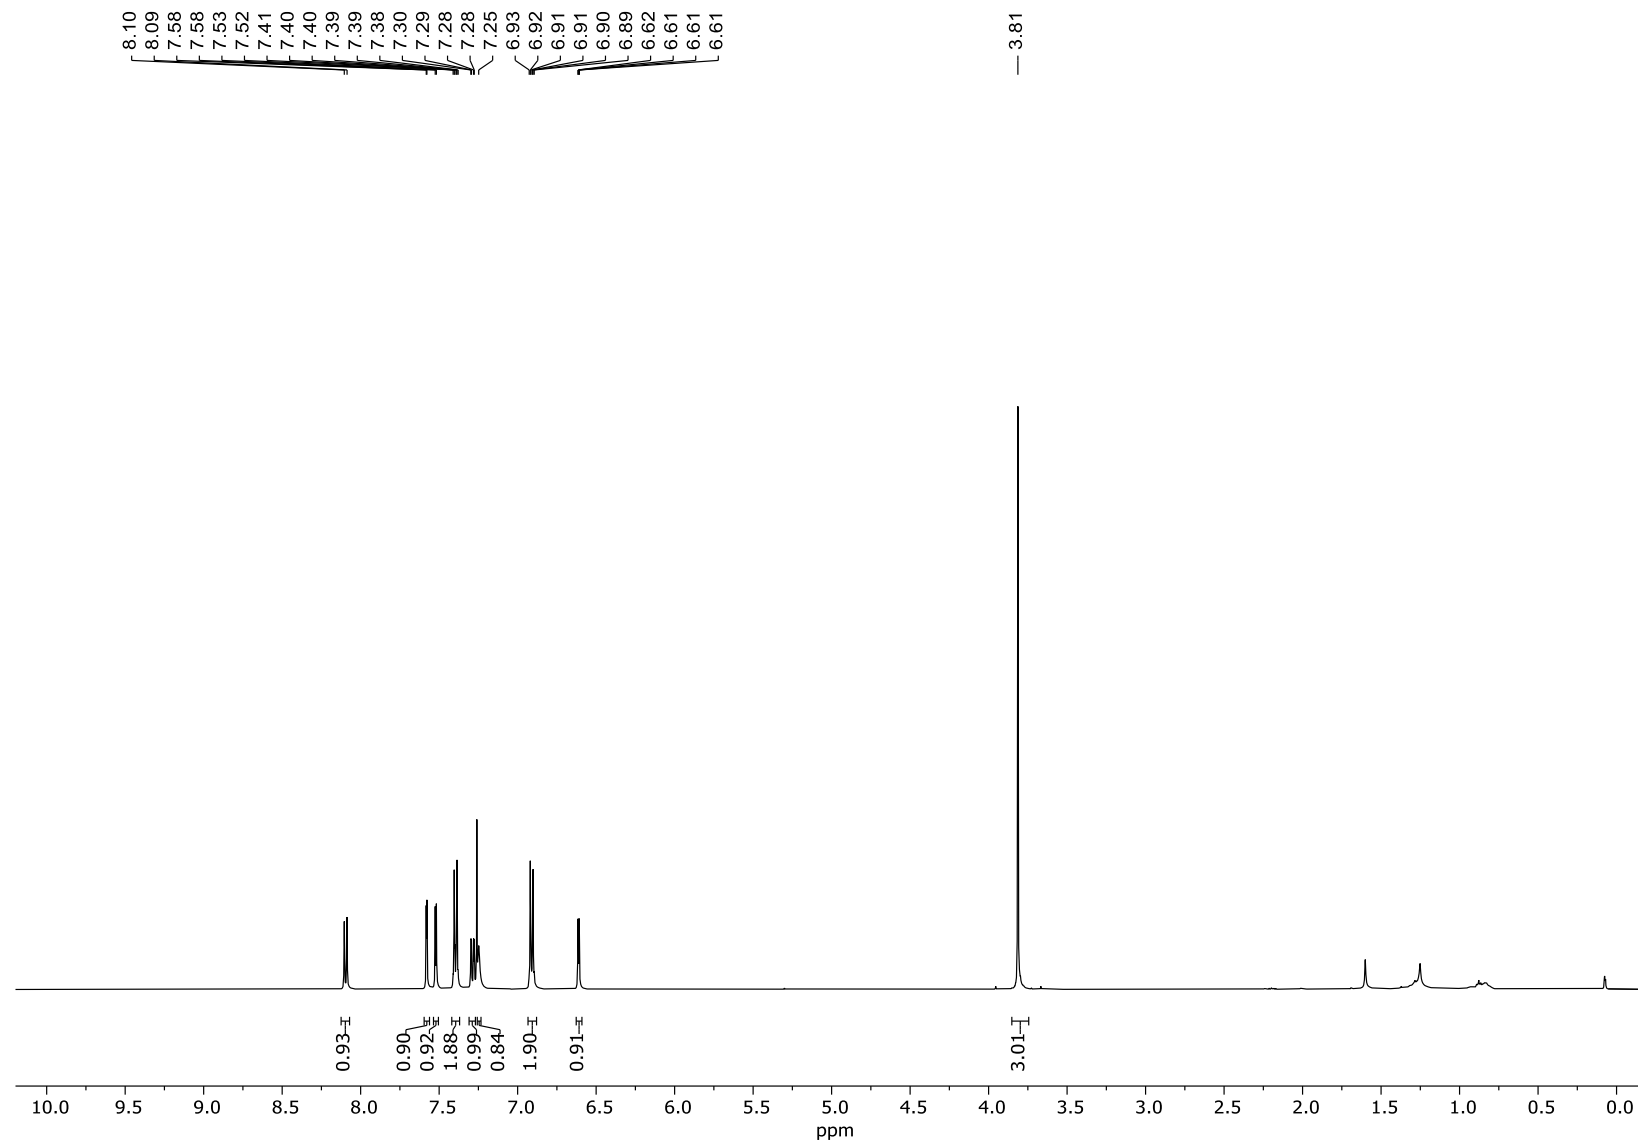

Figure S71:  $^{13}\text{C}$  NMR (126 MHz,  $\text{CDCl}_3$ , 298 K) spectrum of **5h**.

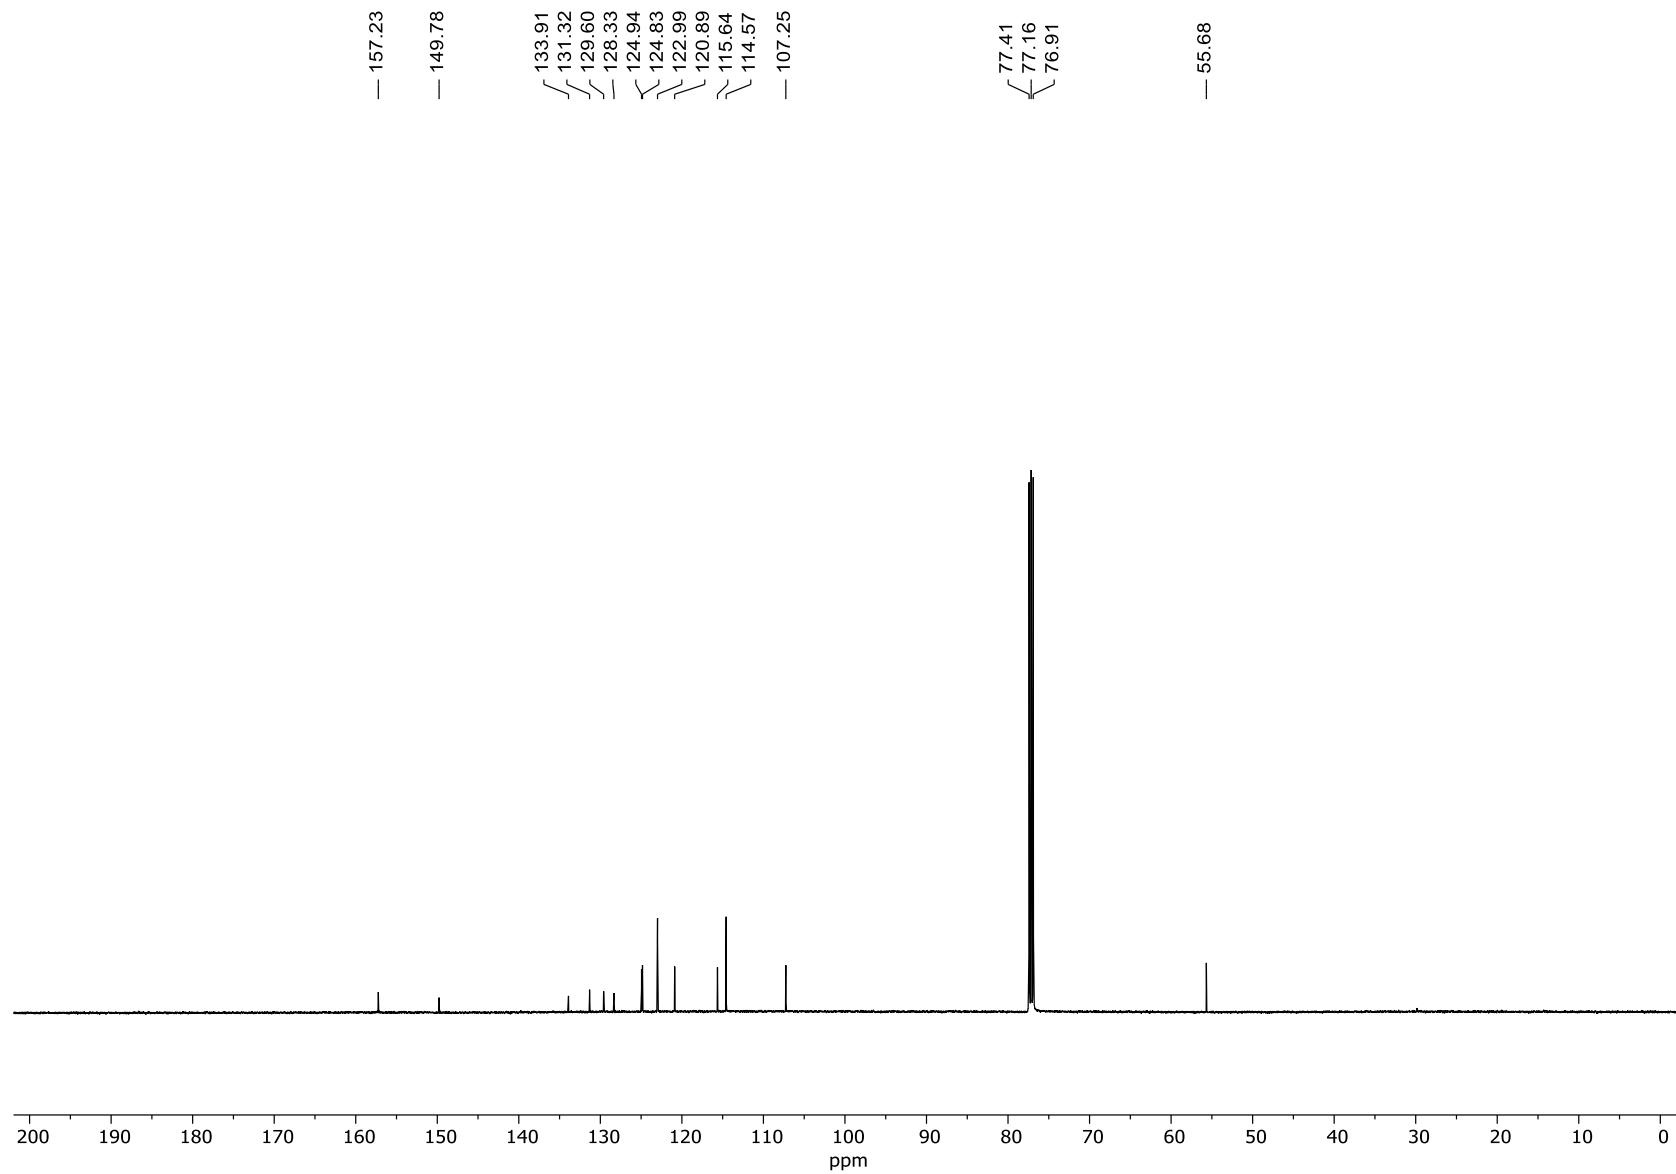

Figure S72:  $^1\text{H}$  NMR (500 MHz,  $\text{CDCl}_3$ , 298 K) spectrum of **5i**.

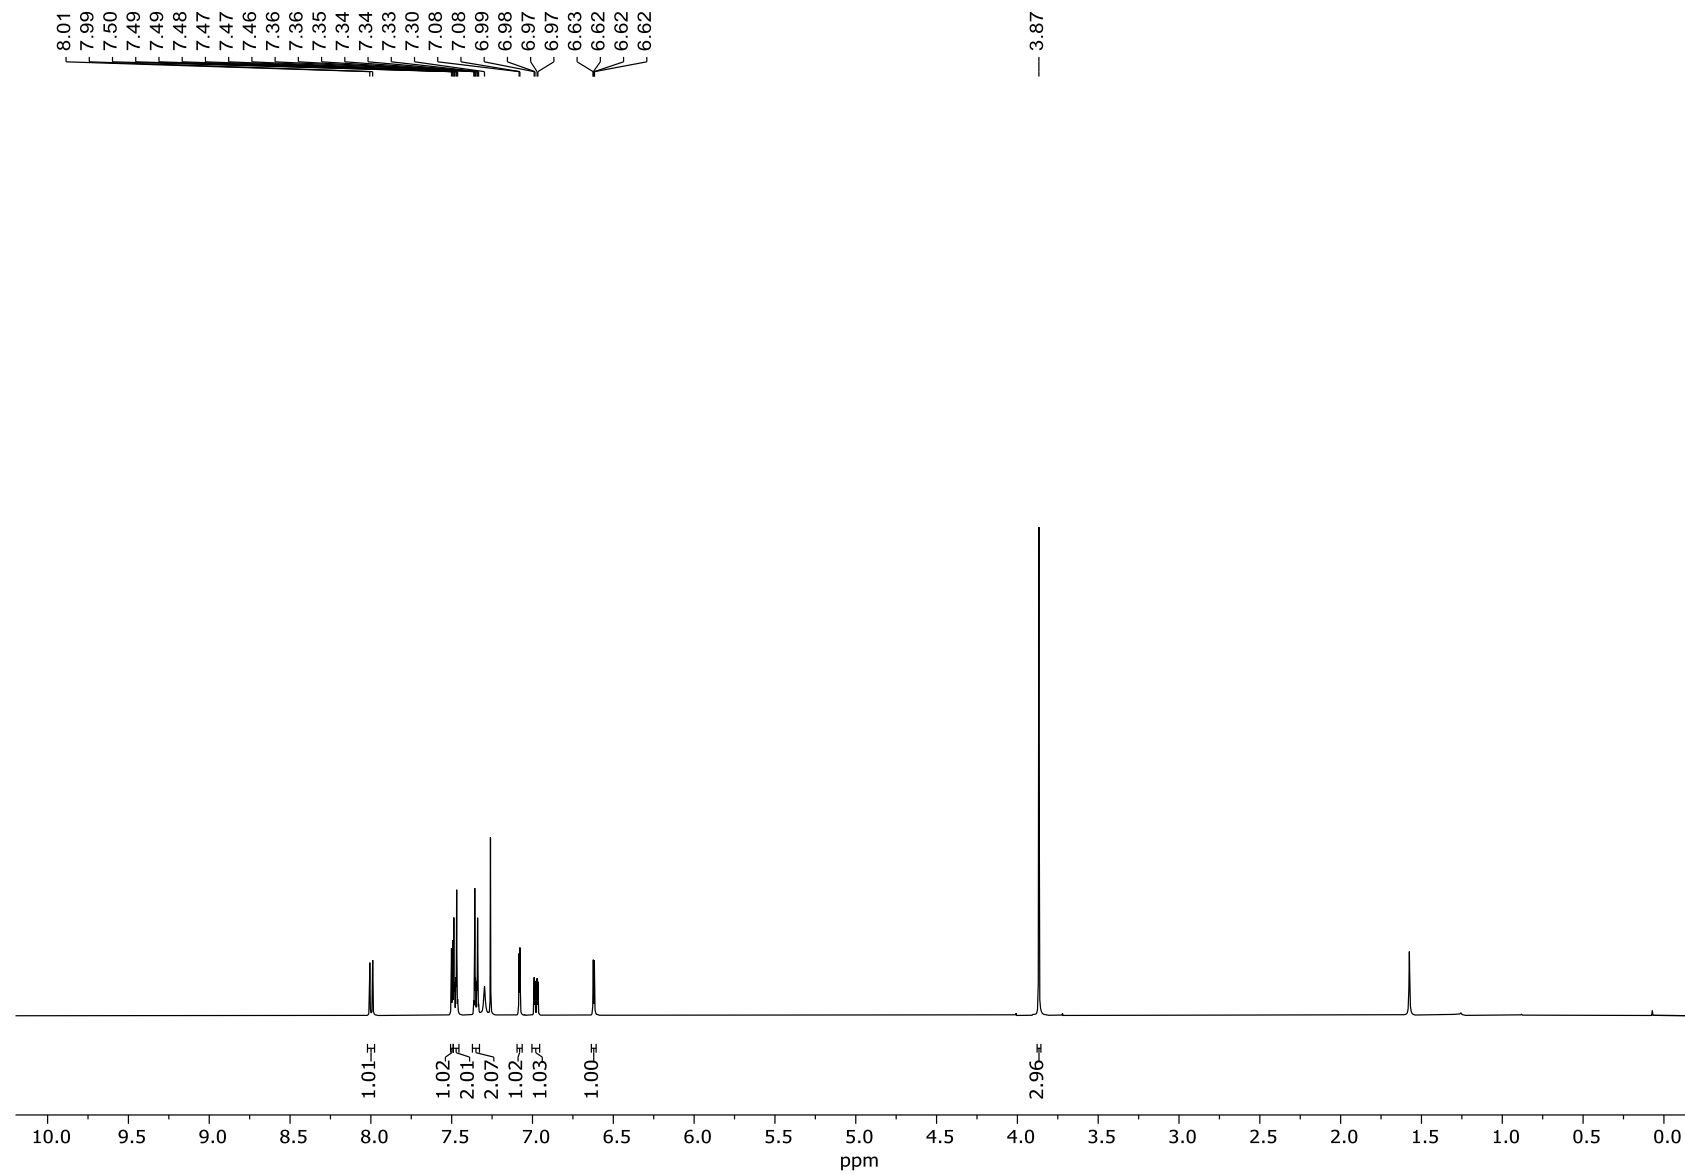

Figure S73:  $^{13}\text{C}$  NMR (126 MHz,  $\text{CDCl}_3$ , 298 K) spectrum of **5i**.

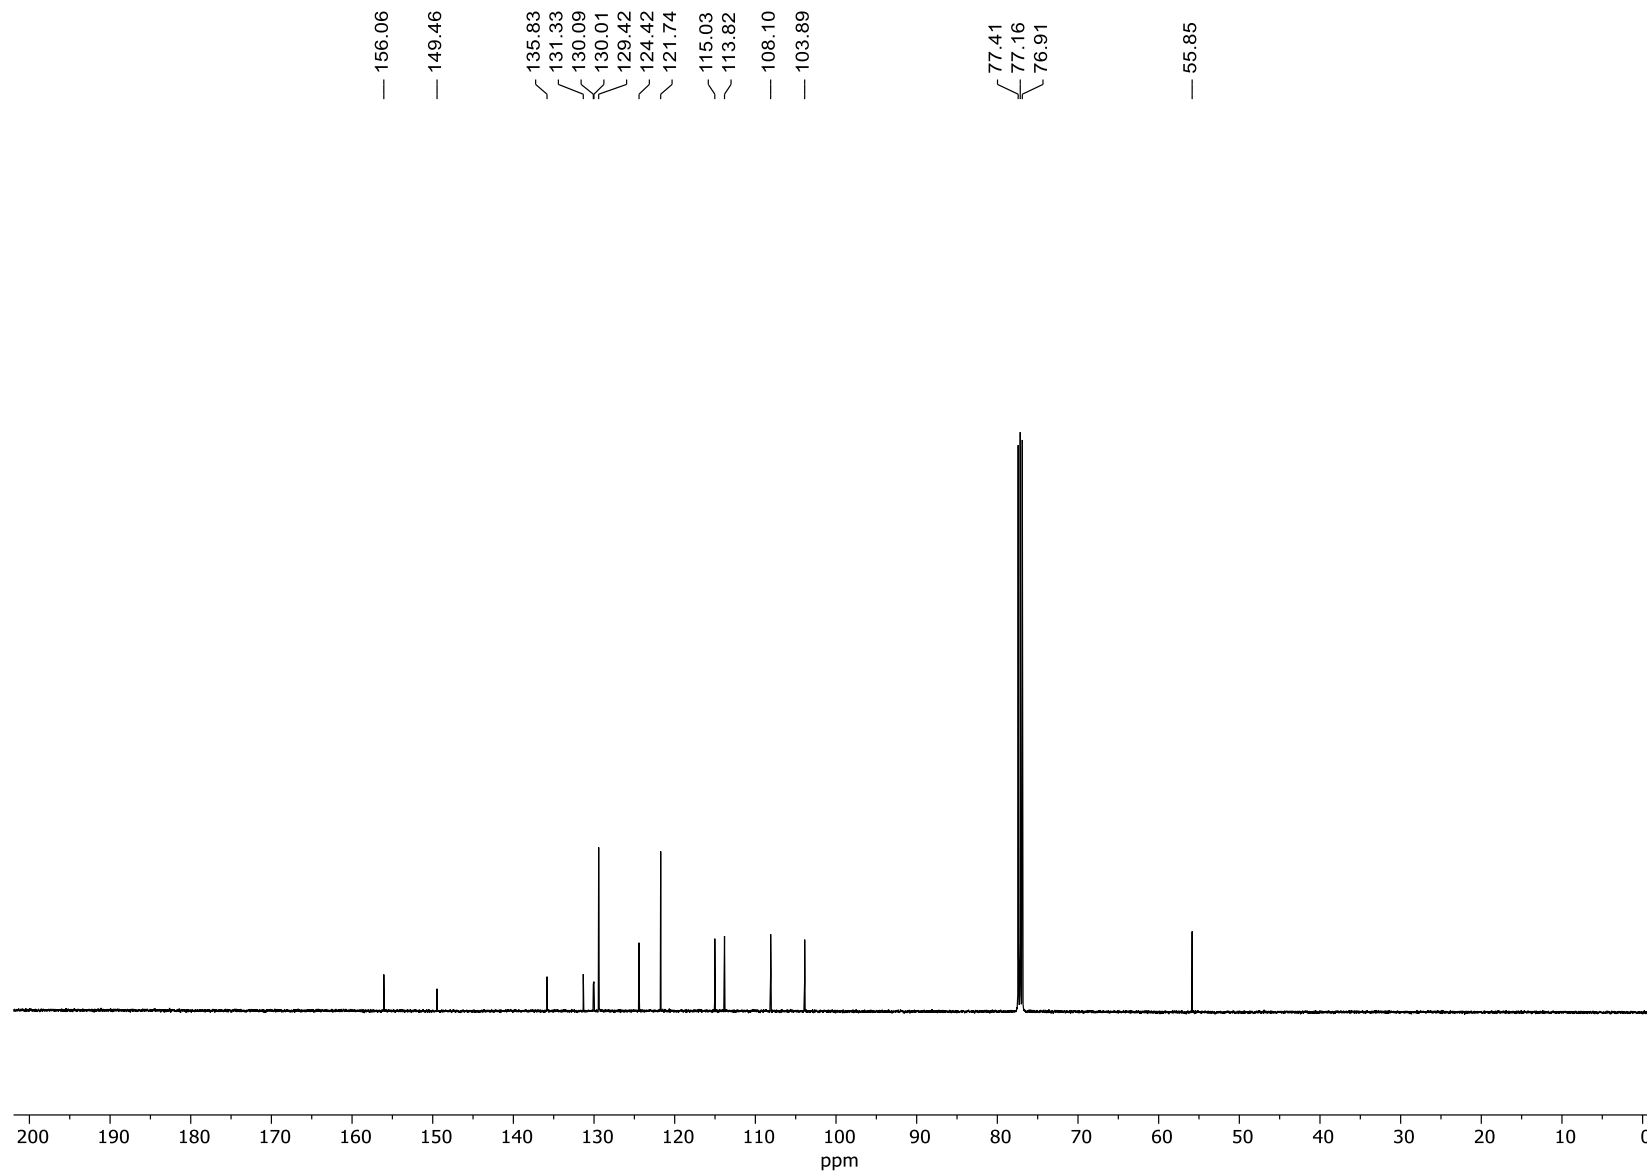

Figure S74:  $^1\text{H}$  NMR (500 MHz,  $\text{CDCl}_3$ , 298 K) spectrum of **5j**.

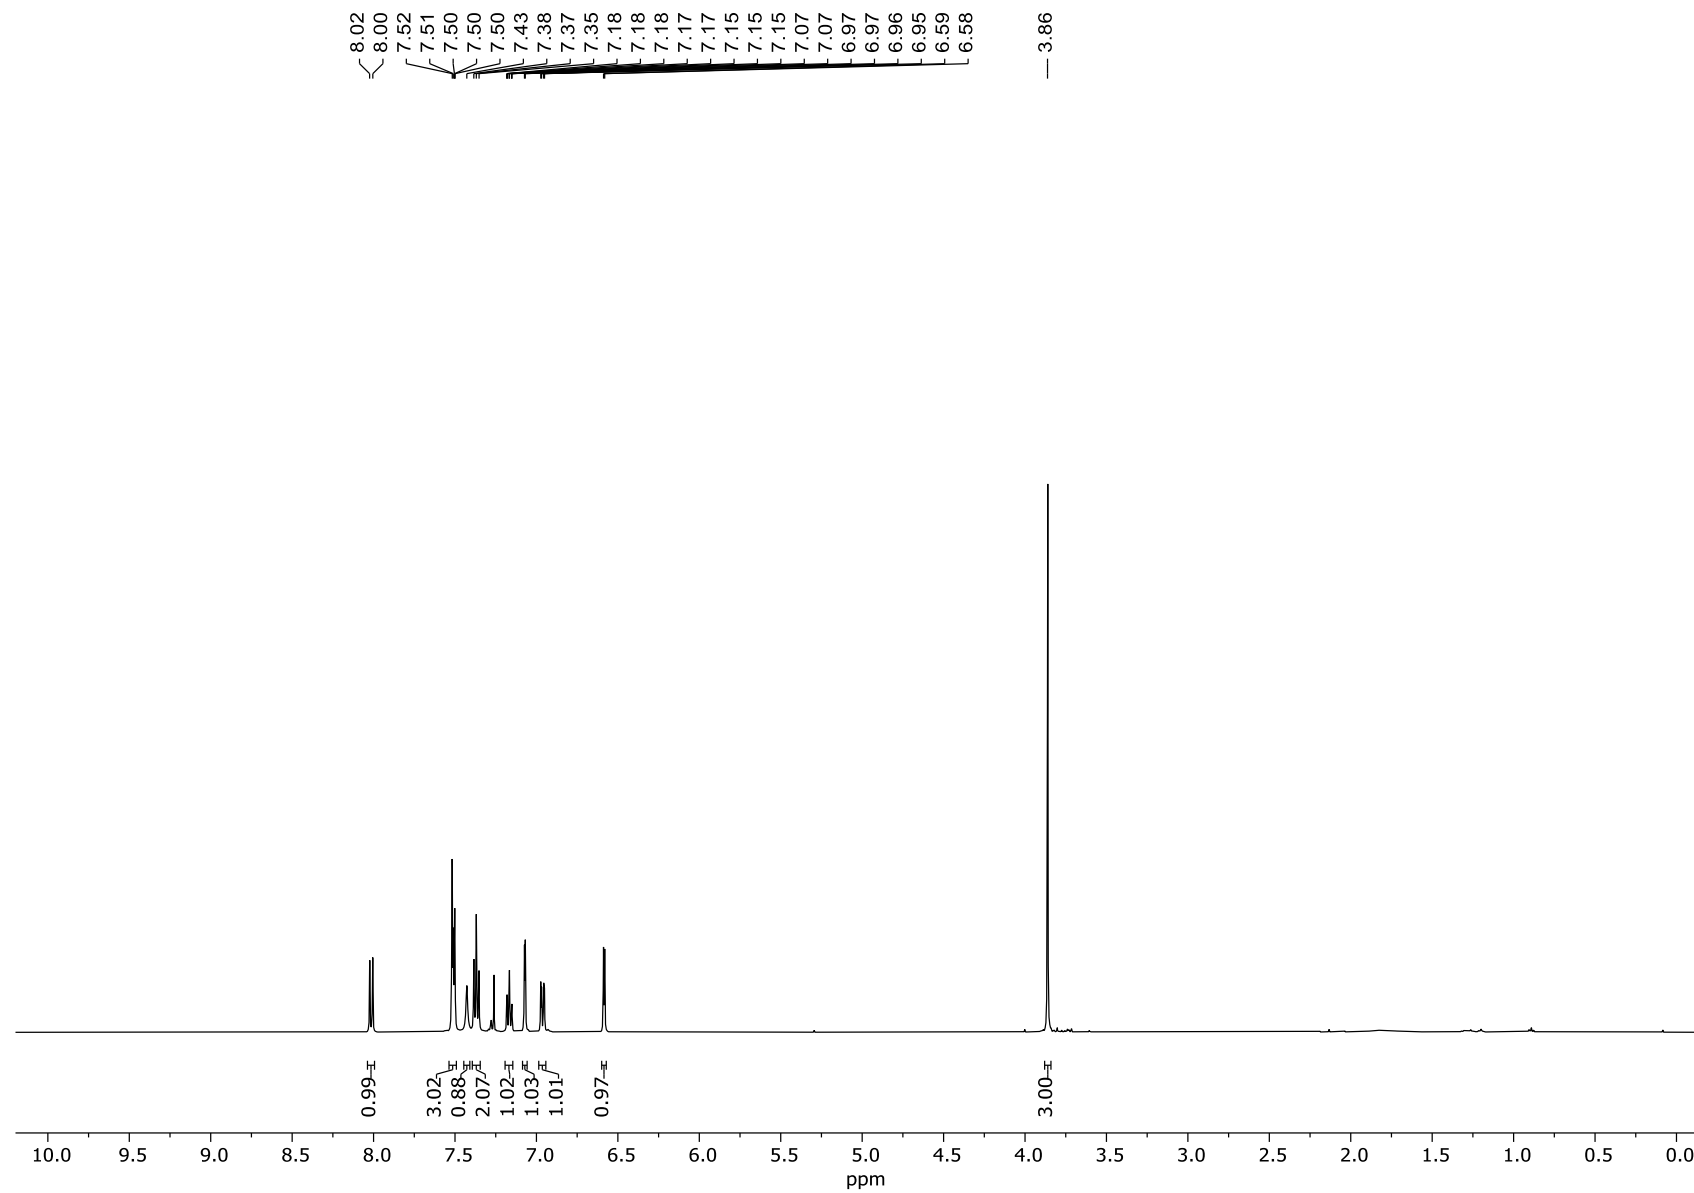

Figure S75:  $^{13}\text{C}$  NMR (126 MHz,  $\text{CDCl}_3$ , 298 K) spectrum of **5j**.

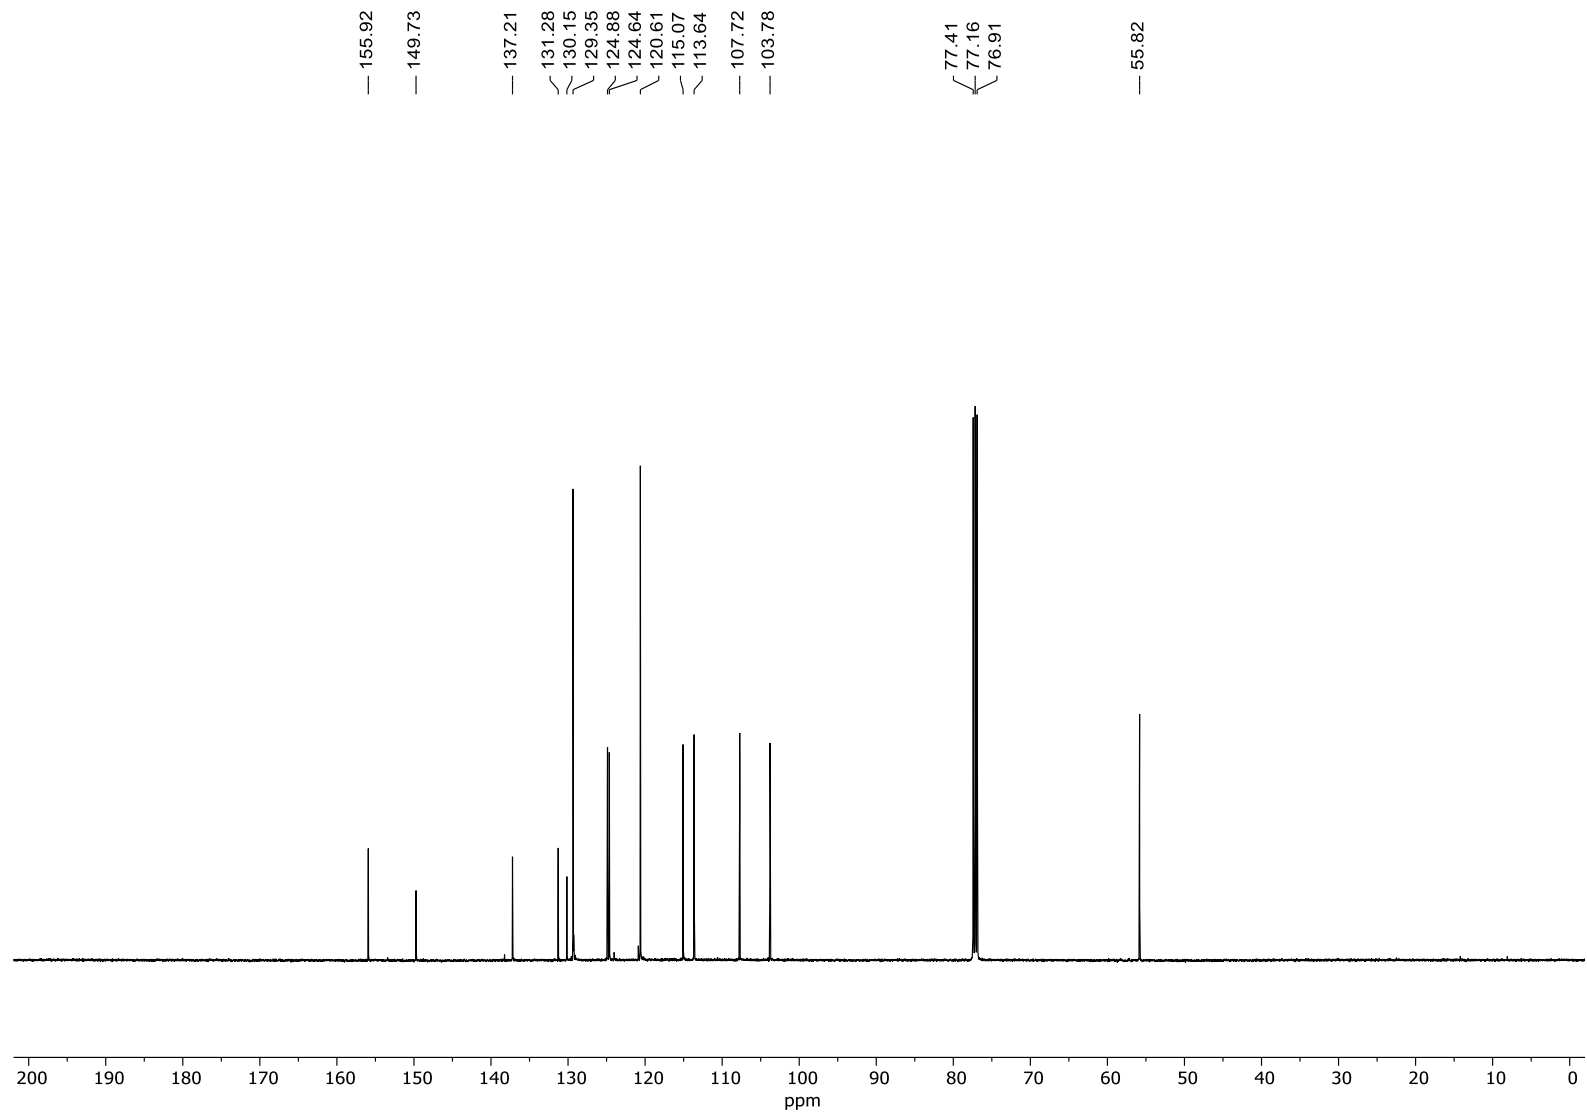



Figure S76:  $^1\text{H}$  NMR (500 MHz,  $\text{CDCl}_3$ , 298 K) spectrum of **5k**.

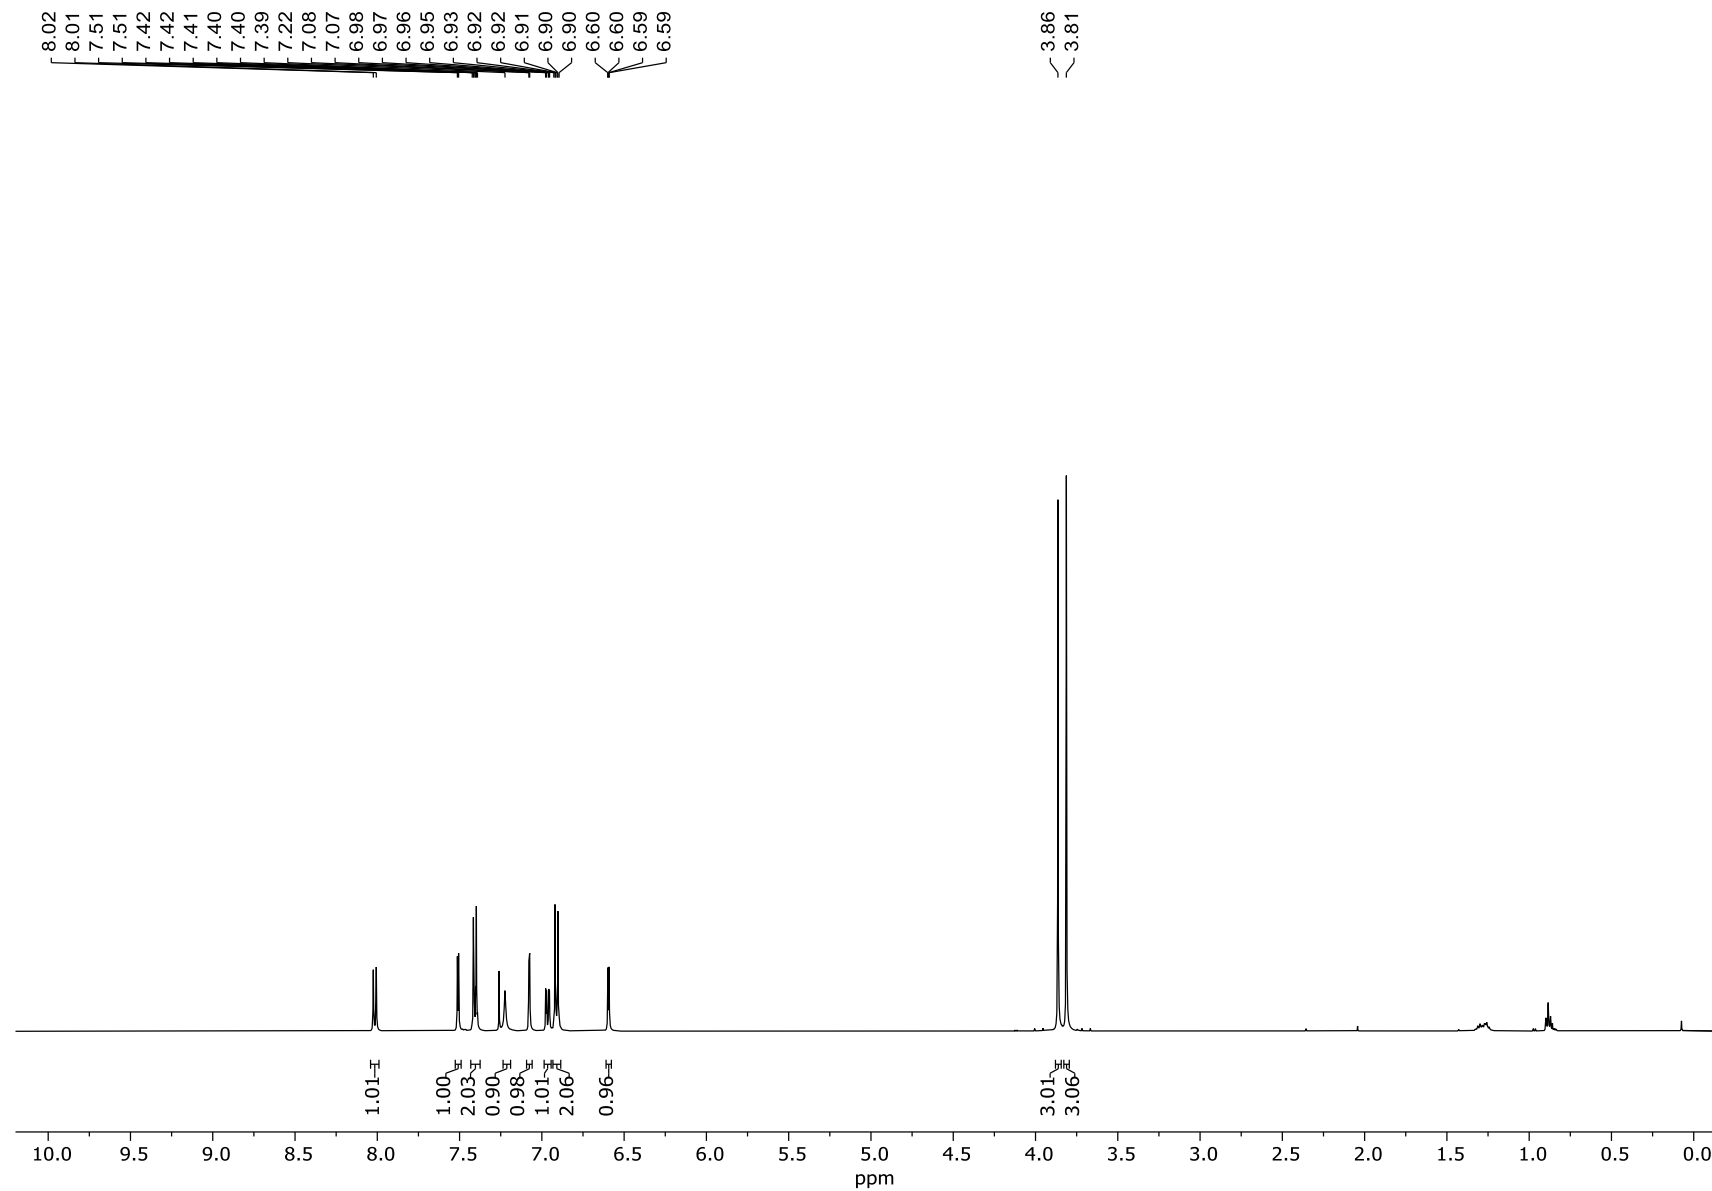

Figure S77:  $^{13}\text{C}$  NMR (126 MHz,  $\text{CDCl}_3$ , 298 K) spectrum of **5k**.

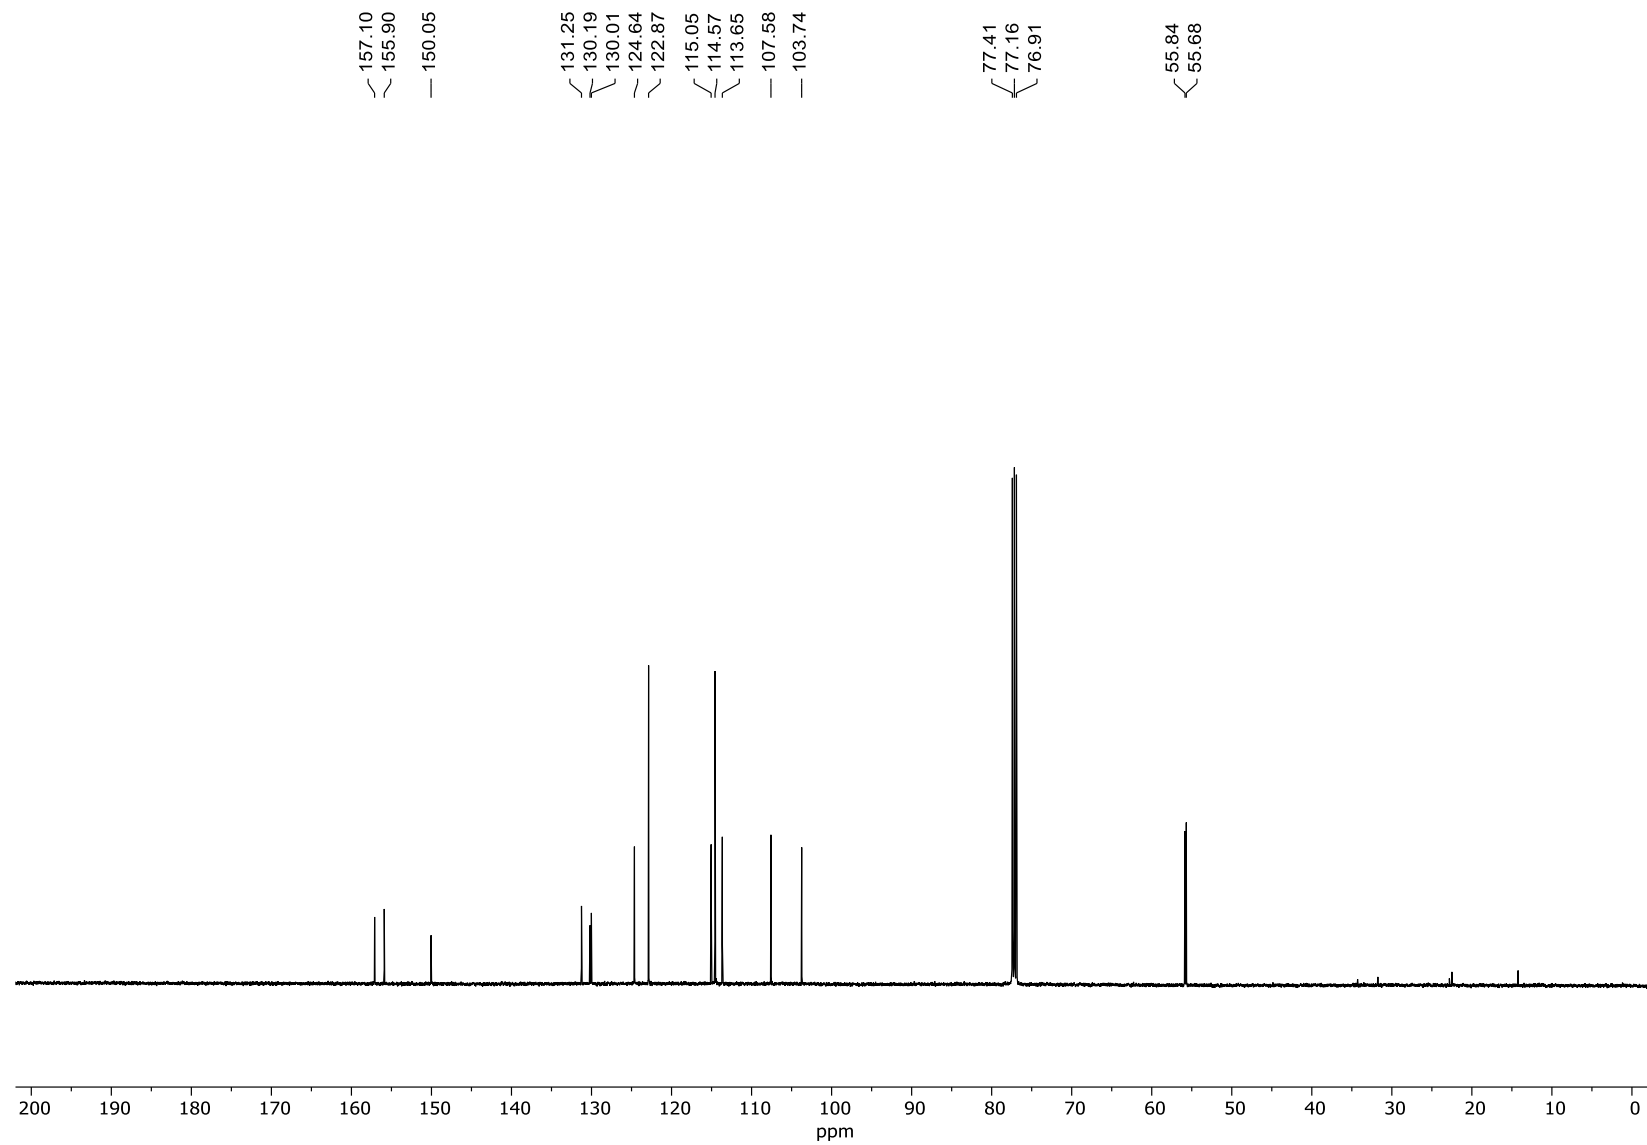

Figure S78:  $^1\text{H}$  NMR (500 MHz,  $\text{CDCl}_3$ , 298 K) spectrum of **51**.

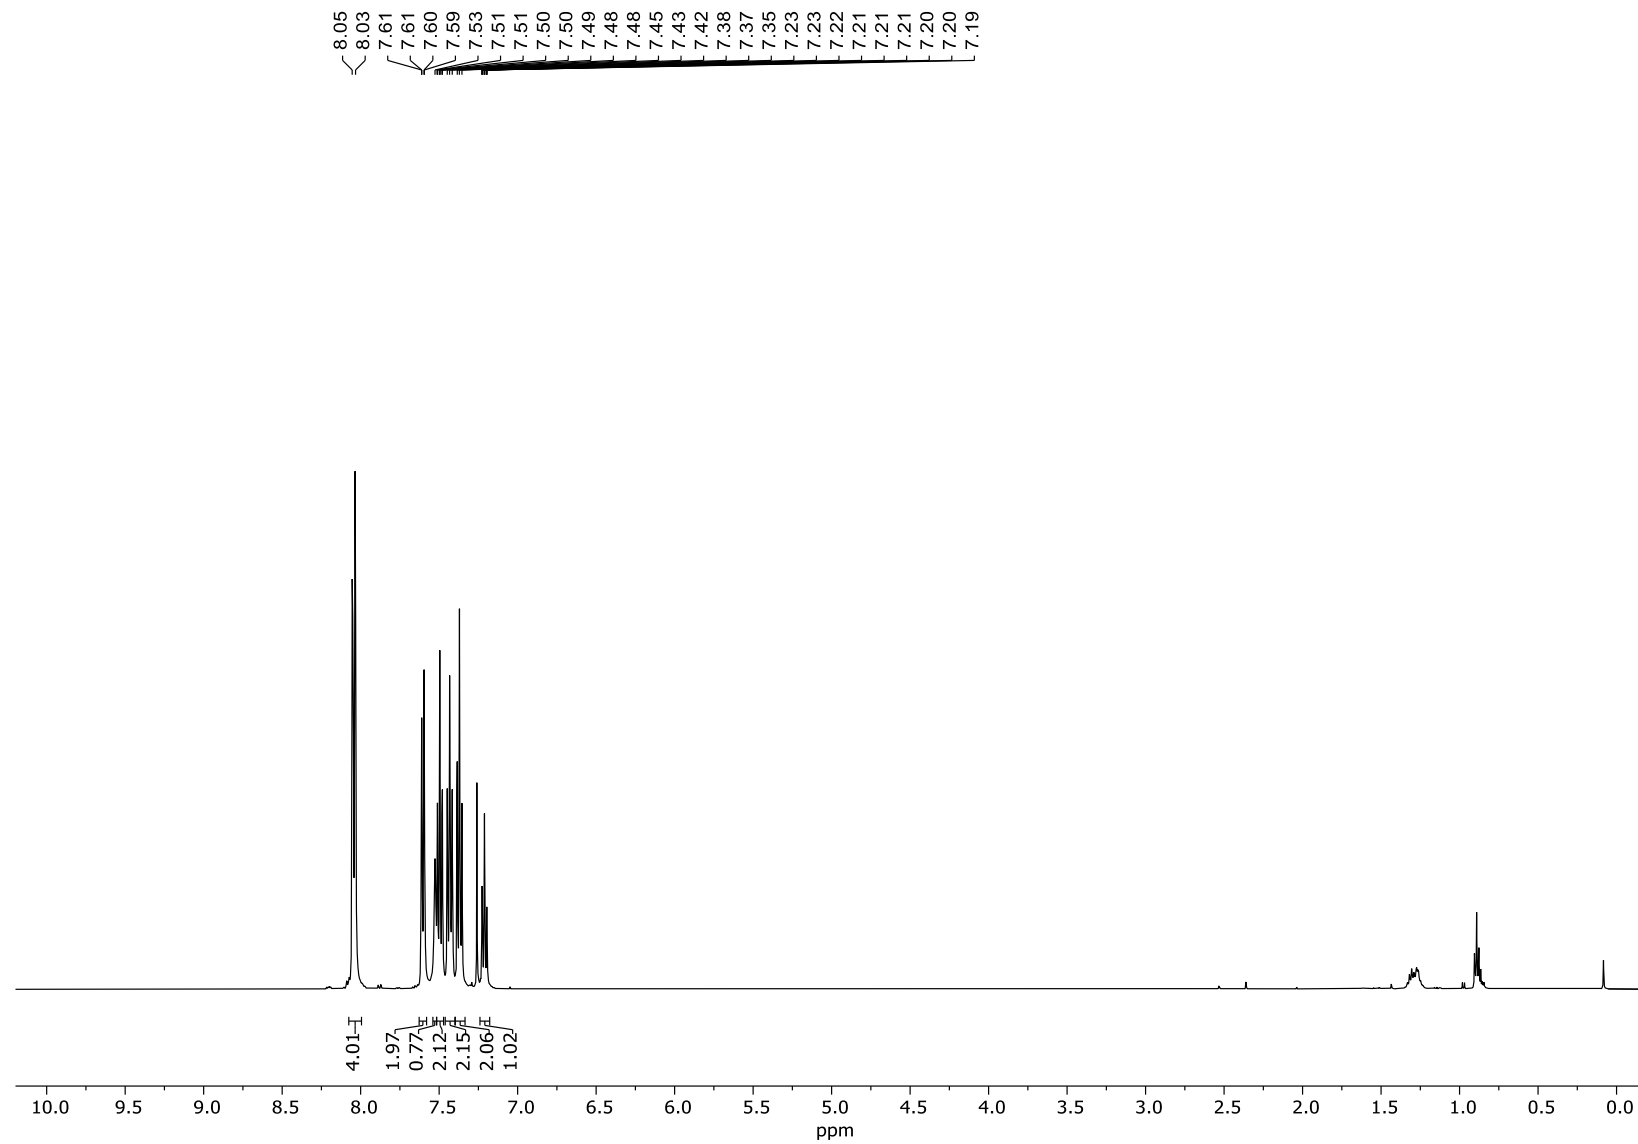

Figure S79:  $^{13}\text{C}$  NMR (126 MHz,  $\text{CDCl}_3$ , 298 K) spectrum of **5I**.

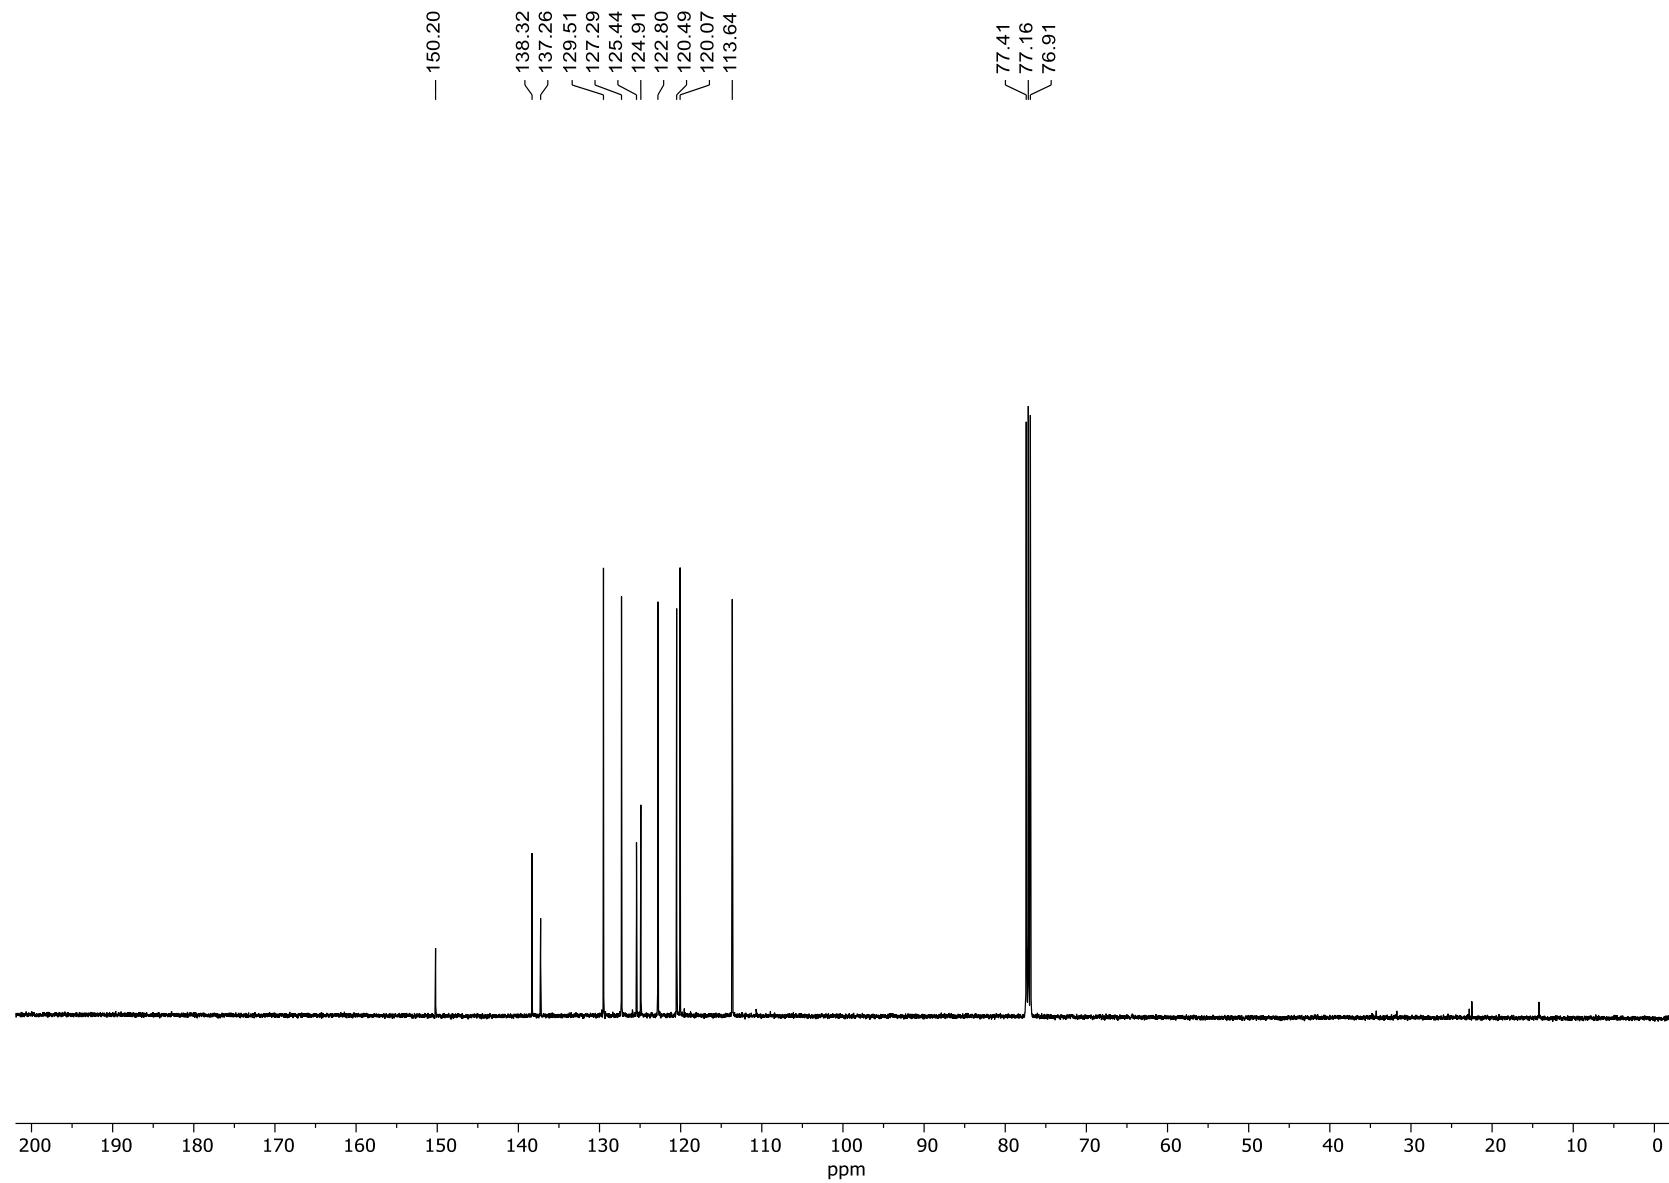

Figure S80:  $^1\text{H}$  NMR (500 MHz,  $\text{CDCl}_3$ , 298 K) spectrum of **5m**.

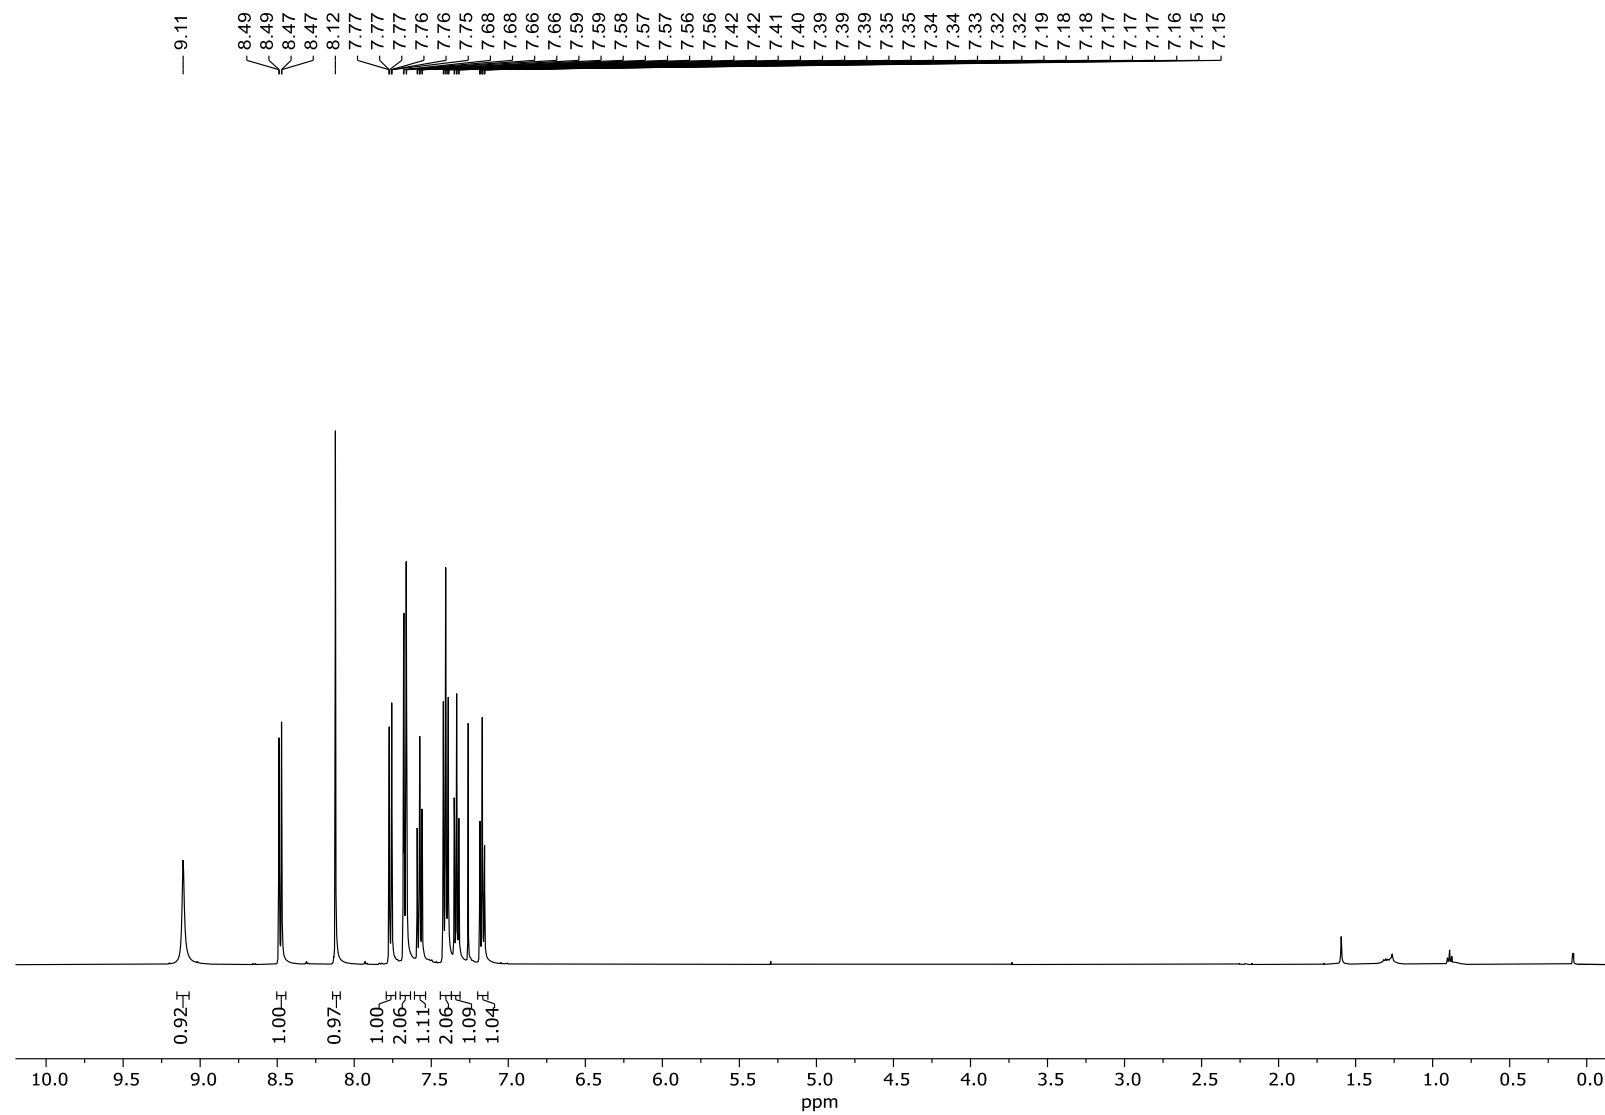

Figure S81:  $^{13}\text{C}$  NMR (126 MHz,  $\text{CDCl}_3$ , 298 K) spectrum of **5m**.

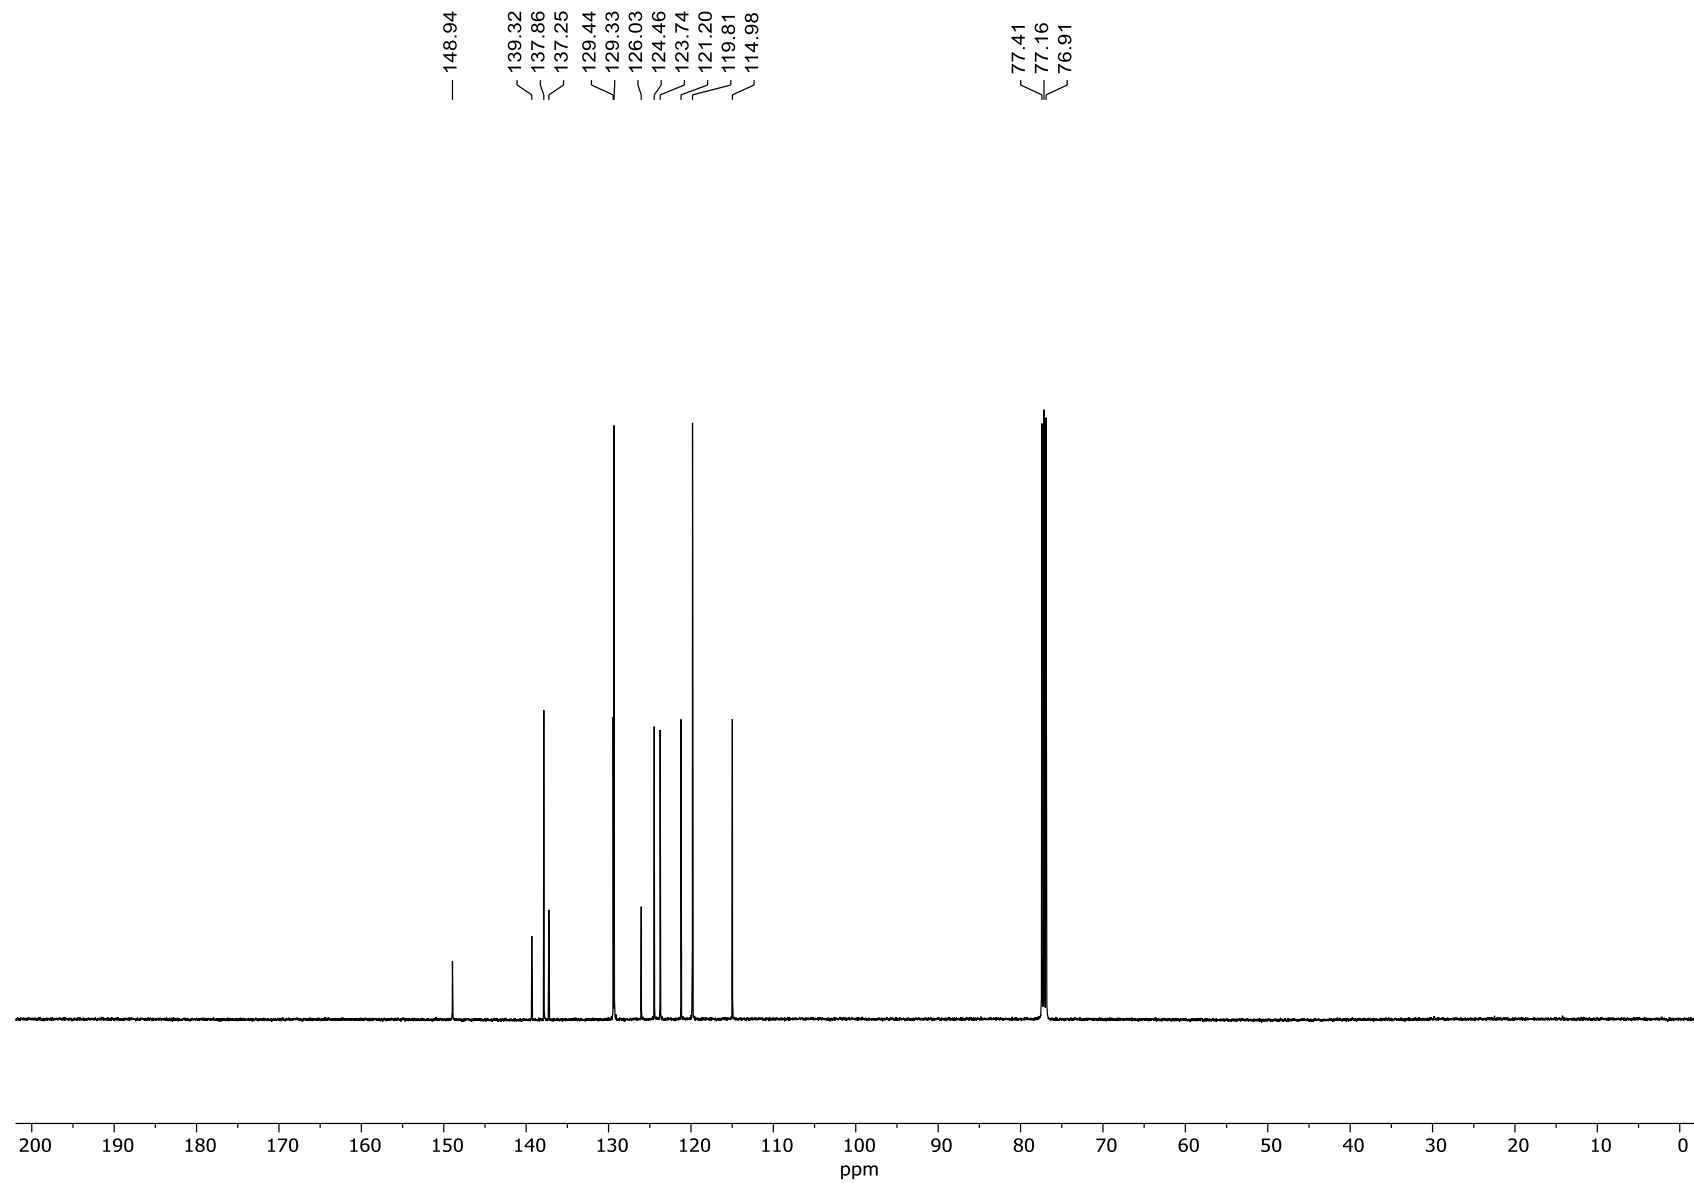

Figure S82:  $^1\text{H}$  NMR (500 MHz,  $\text{CDCl}_3$ , 298 K) spectrum of **5n**.

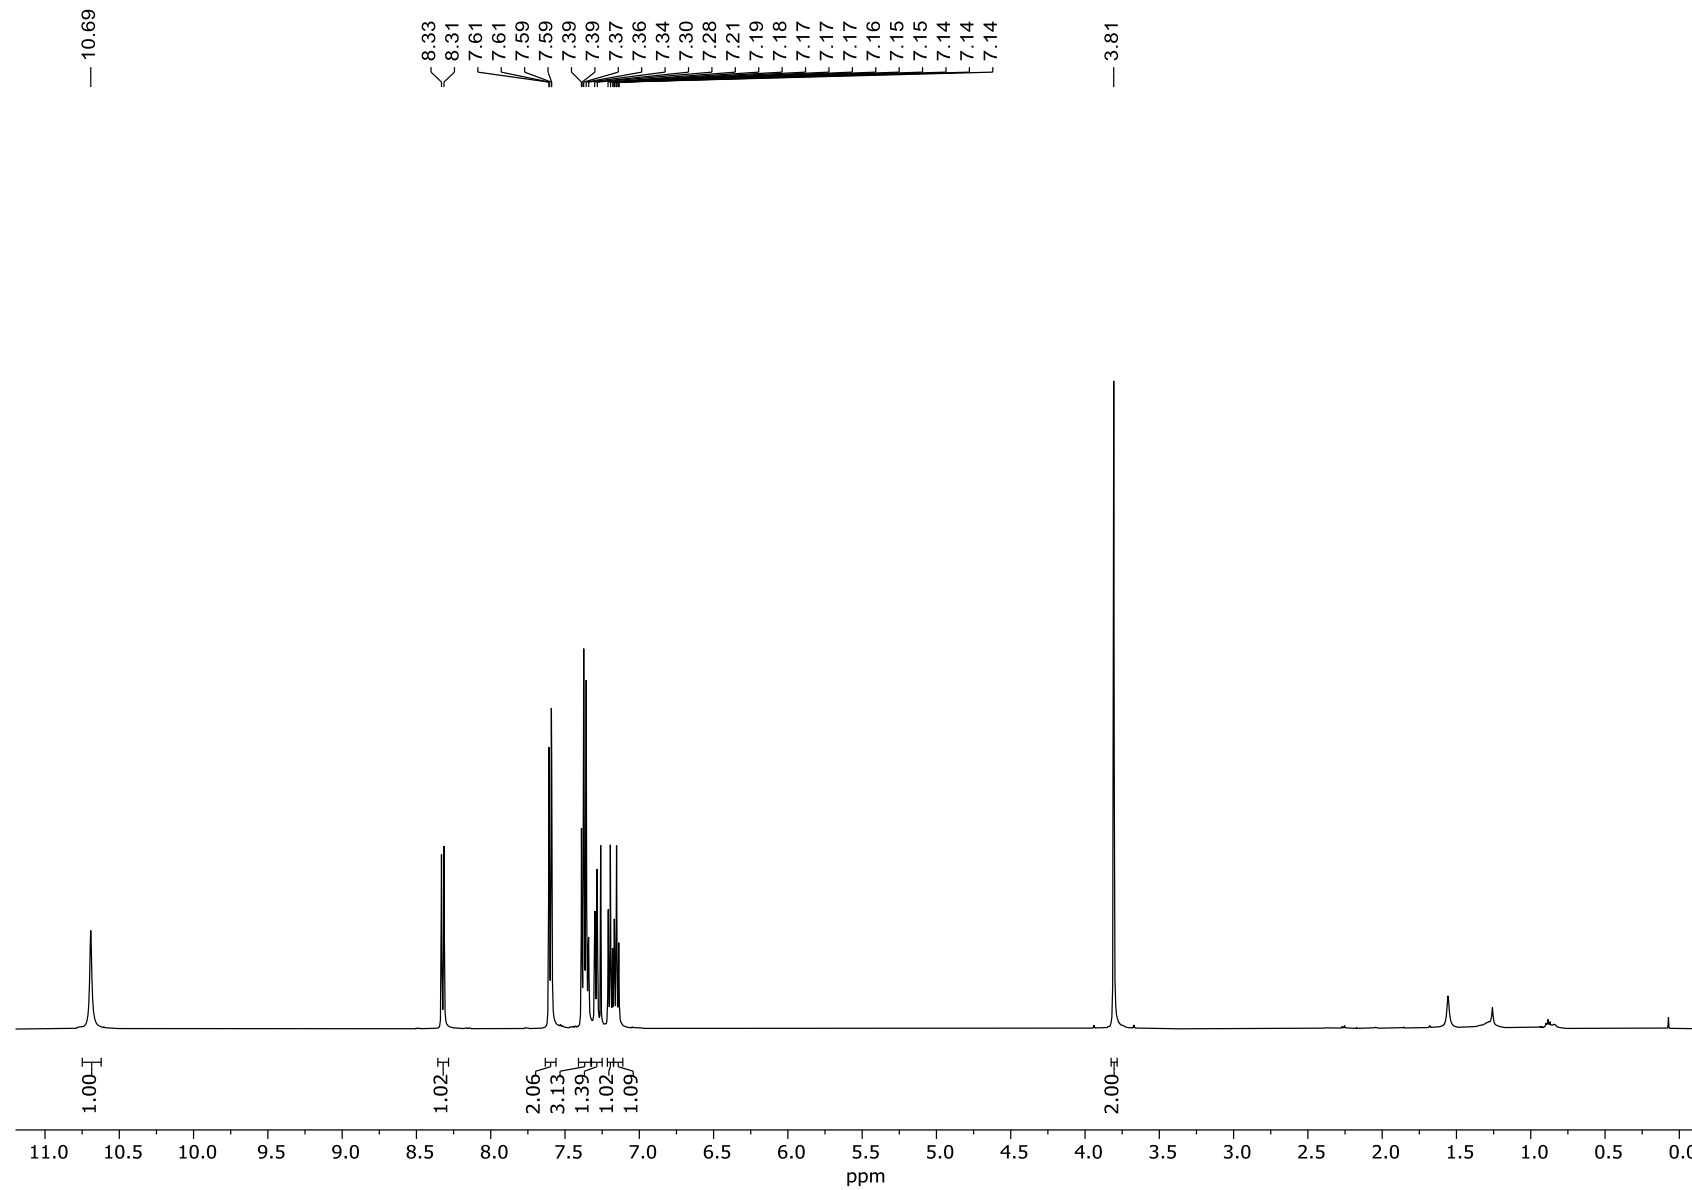

Figure S83:  $^{13}\text{C}$  NMR (126 MHz,  $\text{CDCl}_3$ , 298 K) spectrum of **5n**.

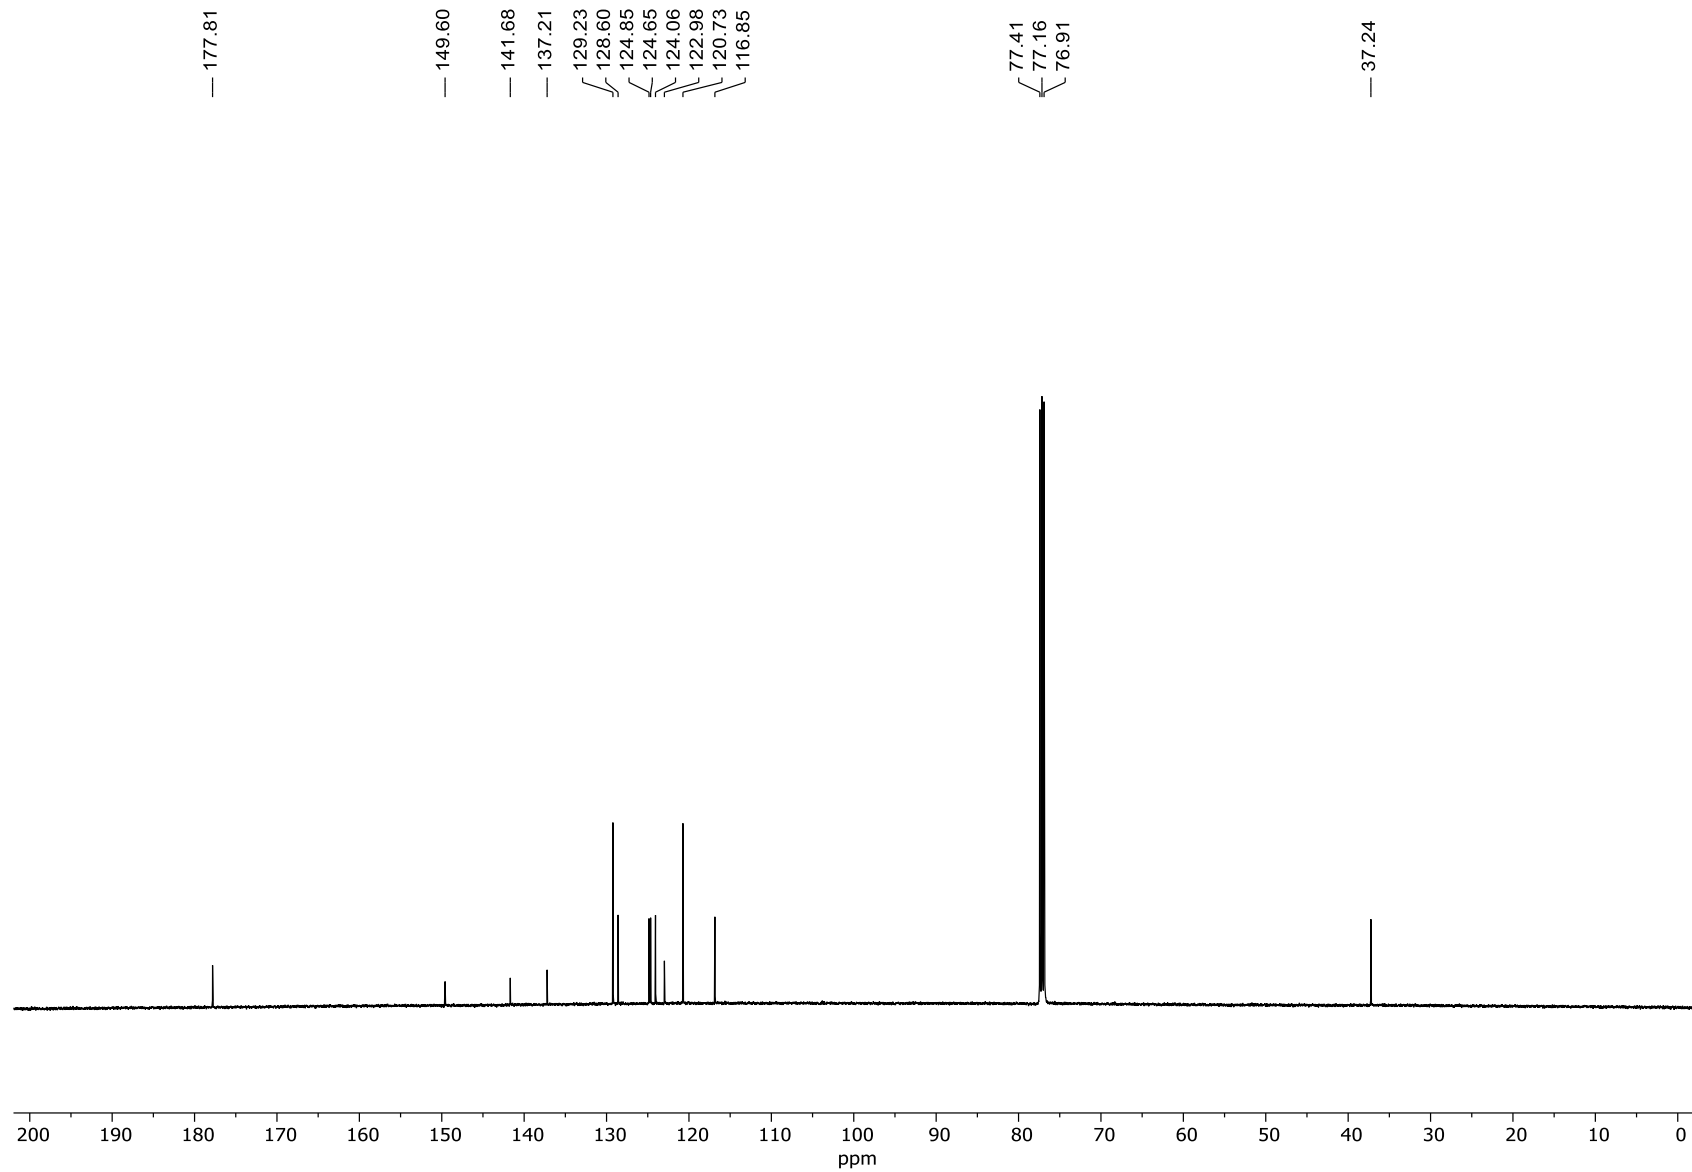



Figure S84:  $^1\text{H}$  NMR (500 MHz,  $\text{CDCl}_3$ , 298 K) spectrum of **50**.

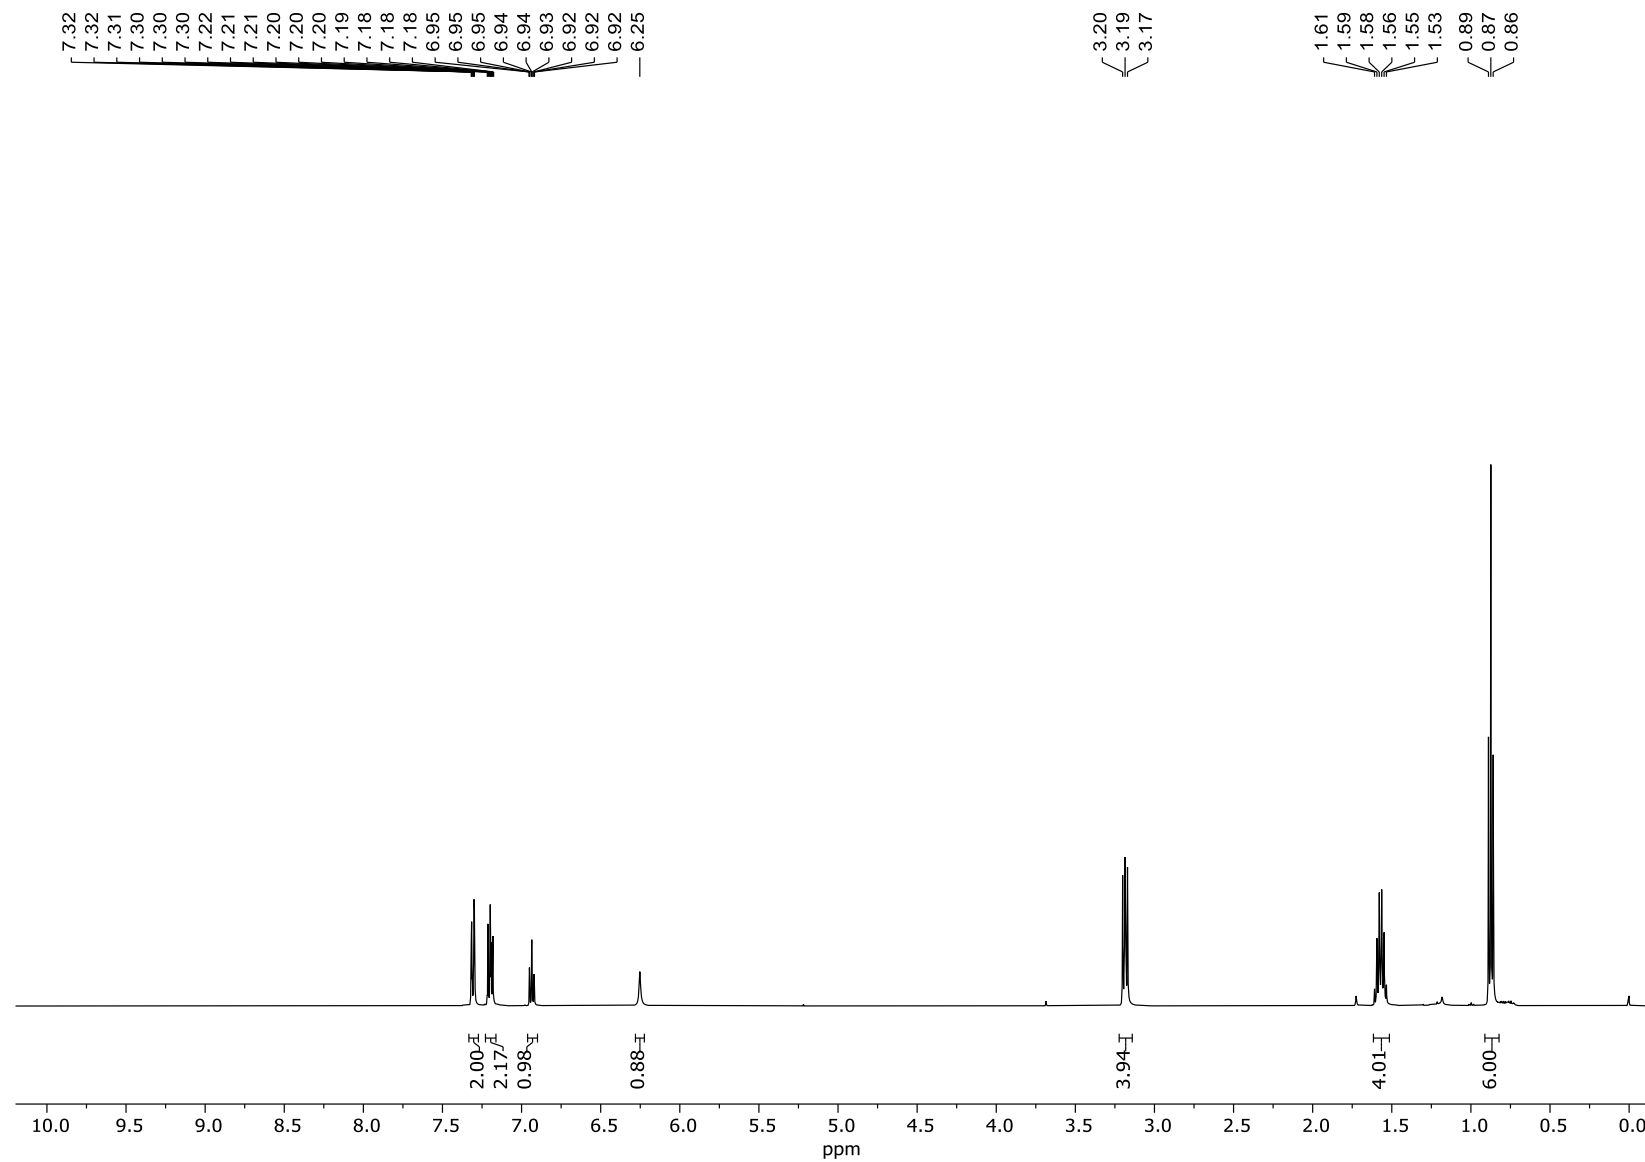

Figure S85:  $^{13}\text{C}$  NMR (101 MHz,  $\text{CDCl}_3$ , 298 K) spectrum of **5o**.

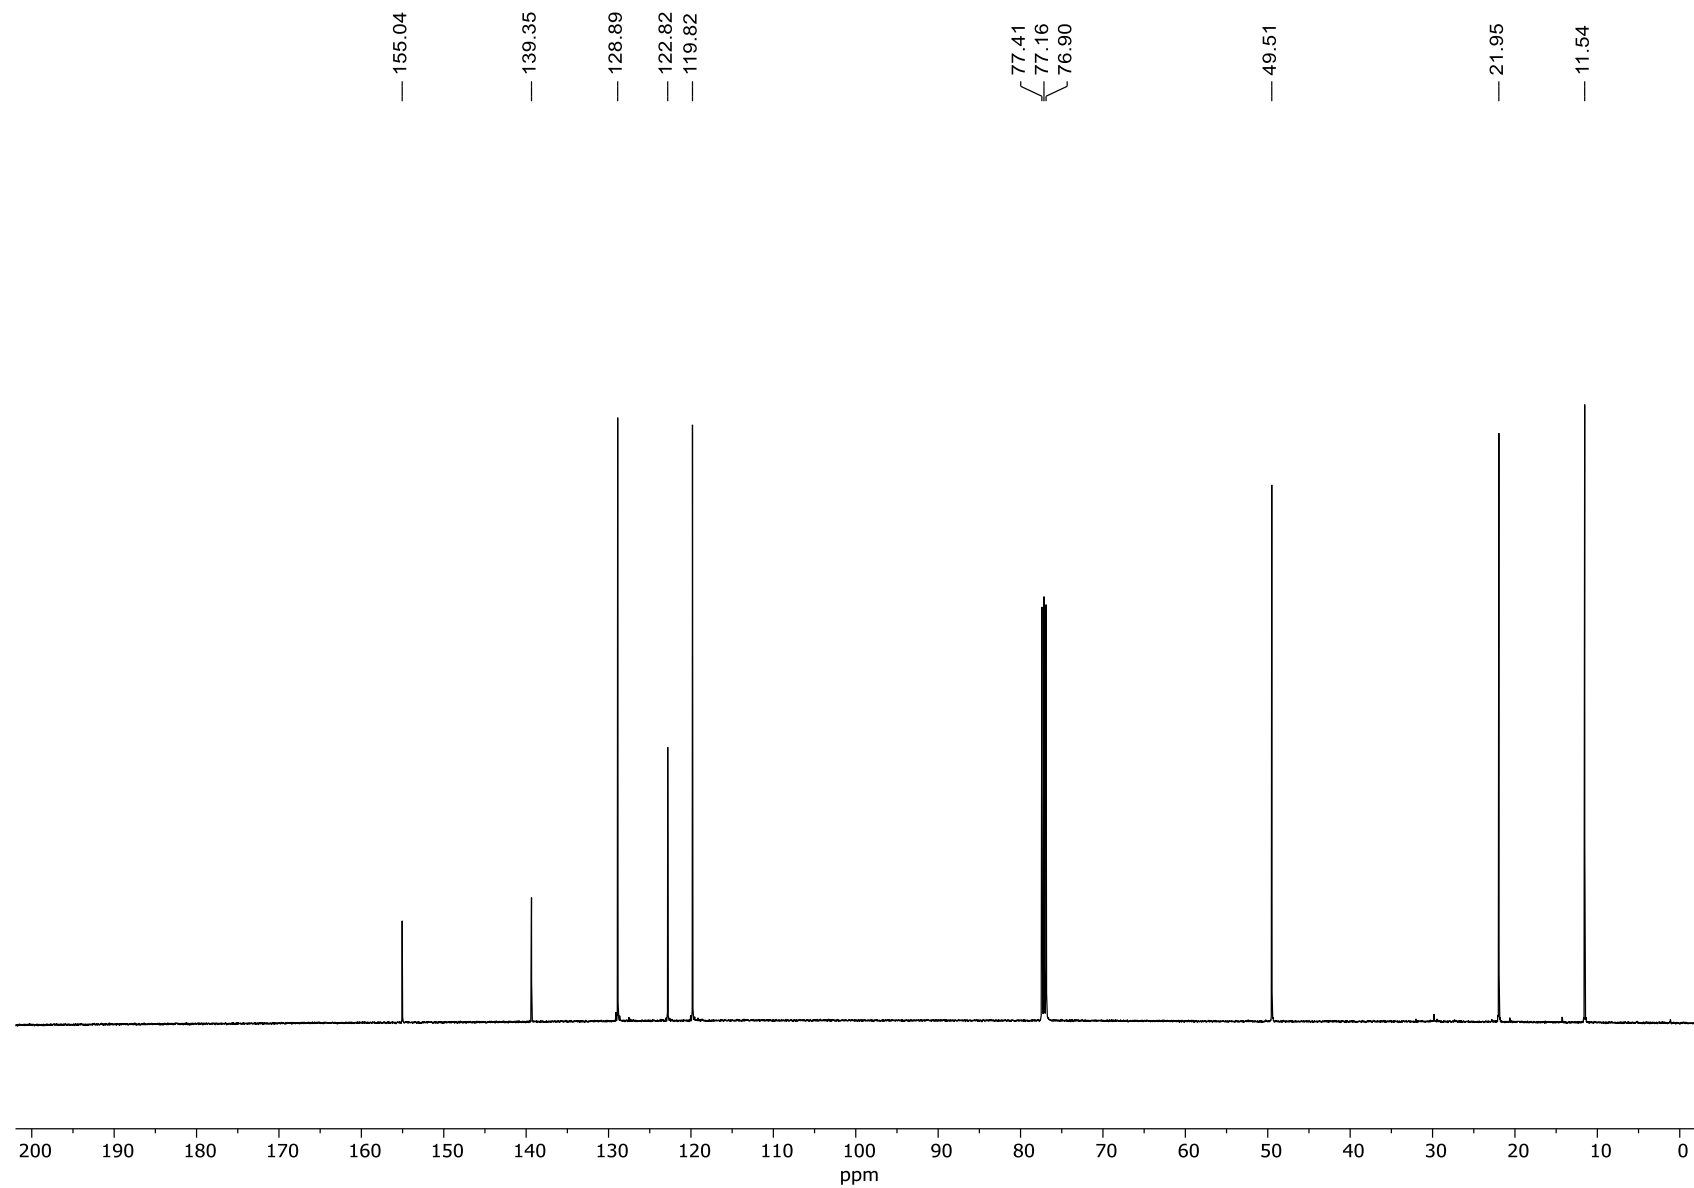

Figure S86:  $^1\text{H}$  NMR (500 MHz,  $\text{CDCl}_3$ , 298 K) spectrum of **5p**.

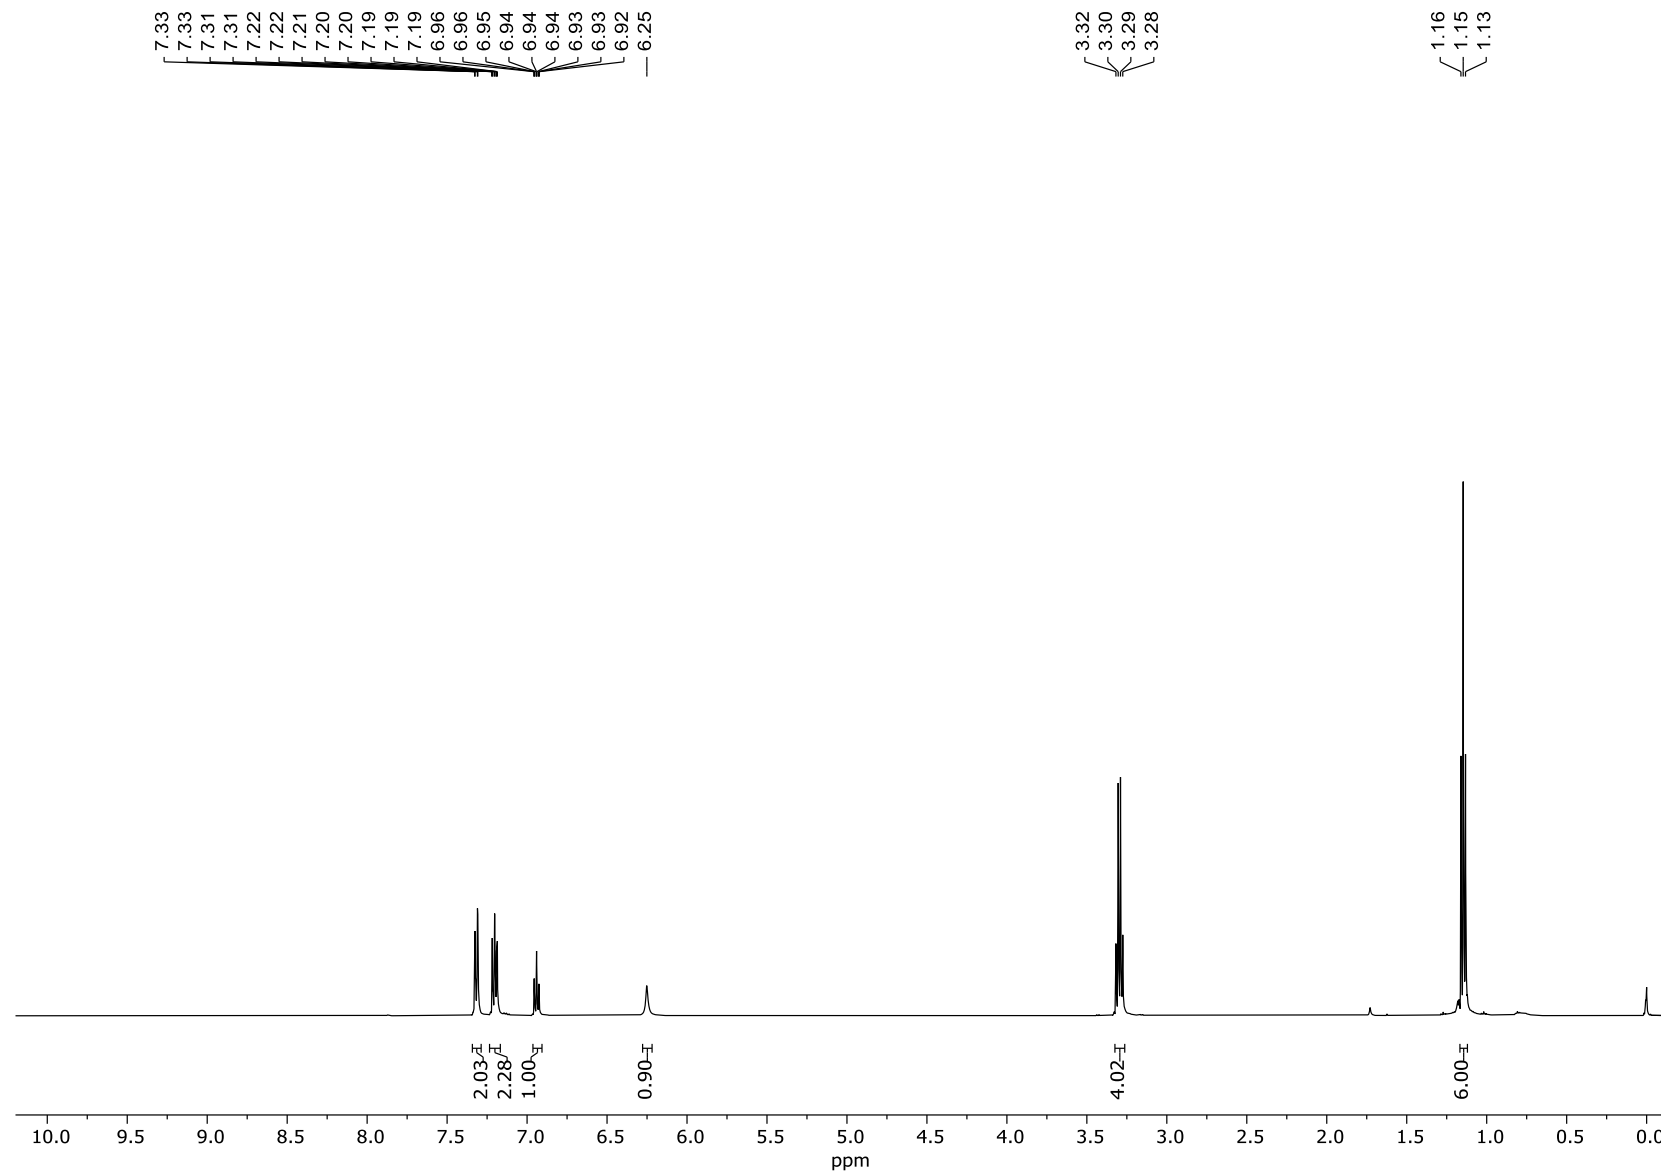

Figure S87:  $^{13}\text{C}$  NMR (101 MHz,  $\text{CDCl}_3$ , 298 K) spectrum of **5p**.

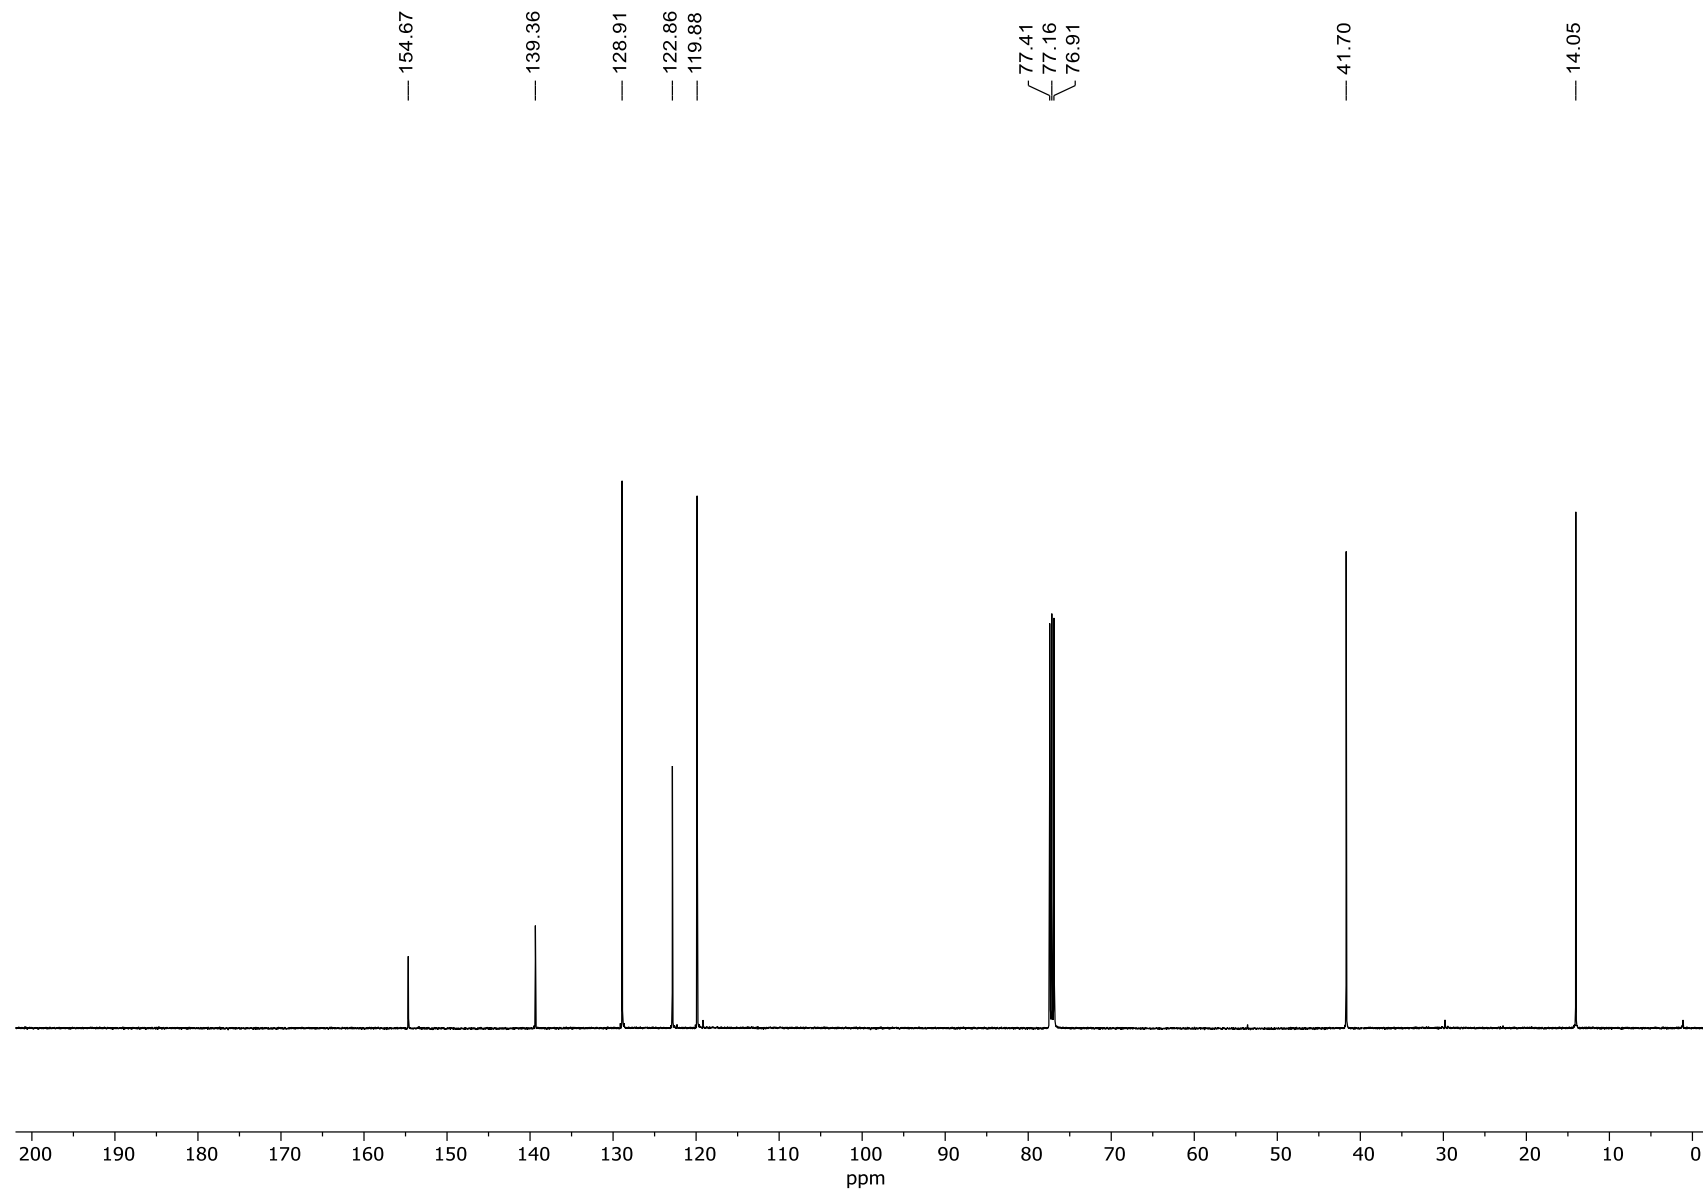

Figure S88:  $^1\text{H}$  NMR (500 MHz,  $\text{CDCl}_3$ , 298 K) spectrum of **5q**.

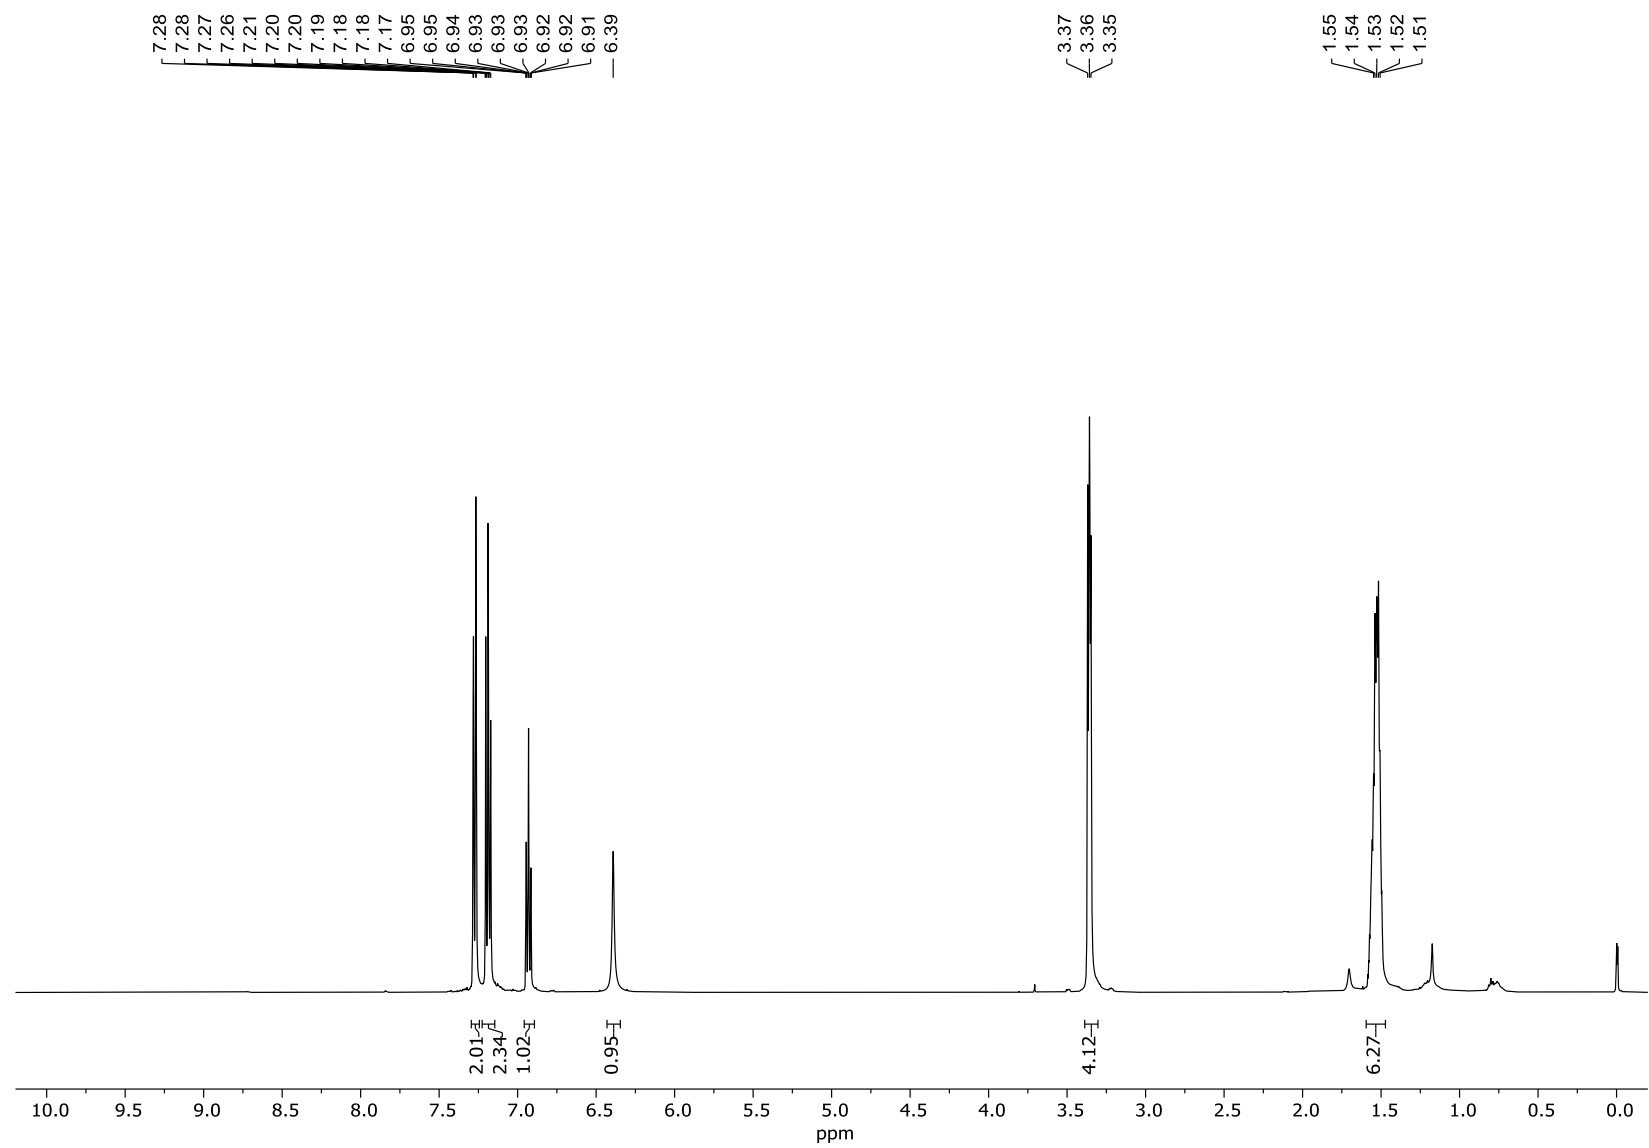

Figure S89:  $^{13}\text{C}$  NMR (101 MHz,  $\text{CDCl}_3$ , 298 K) spectrum of **5q**.

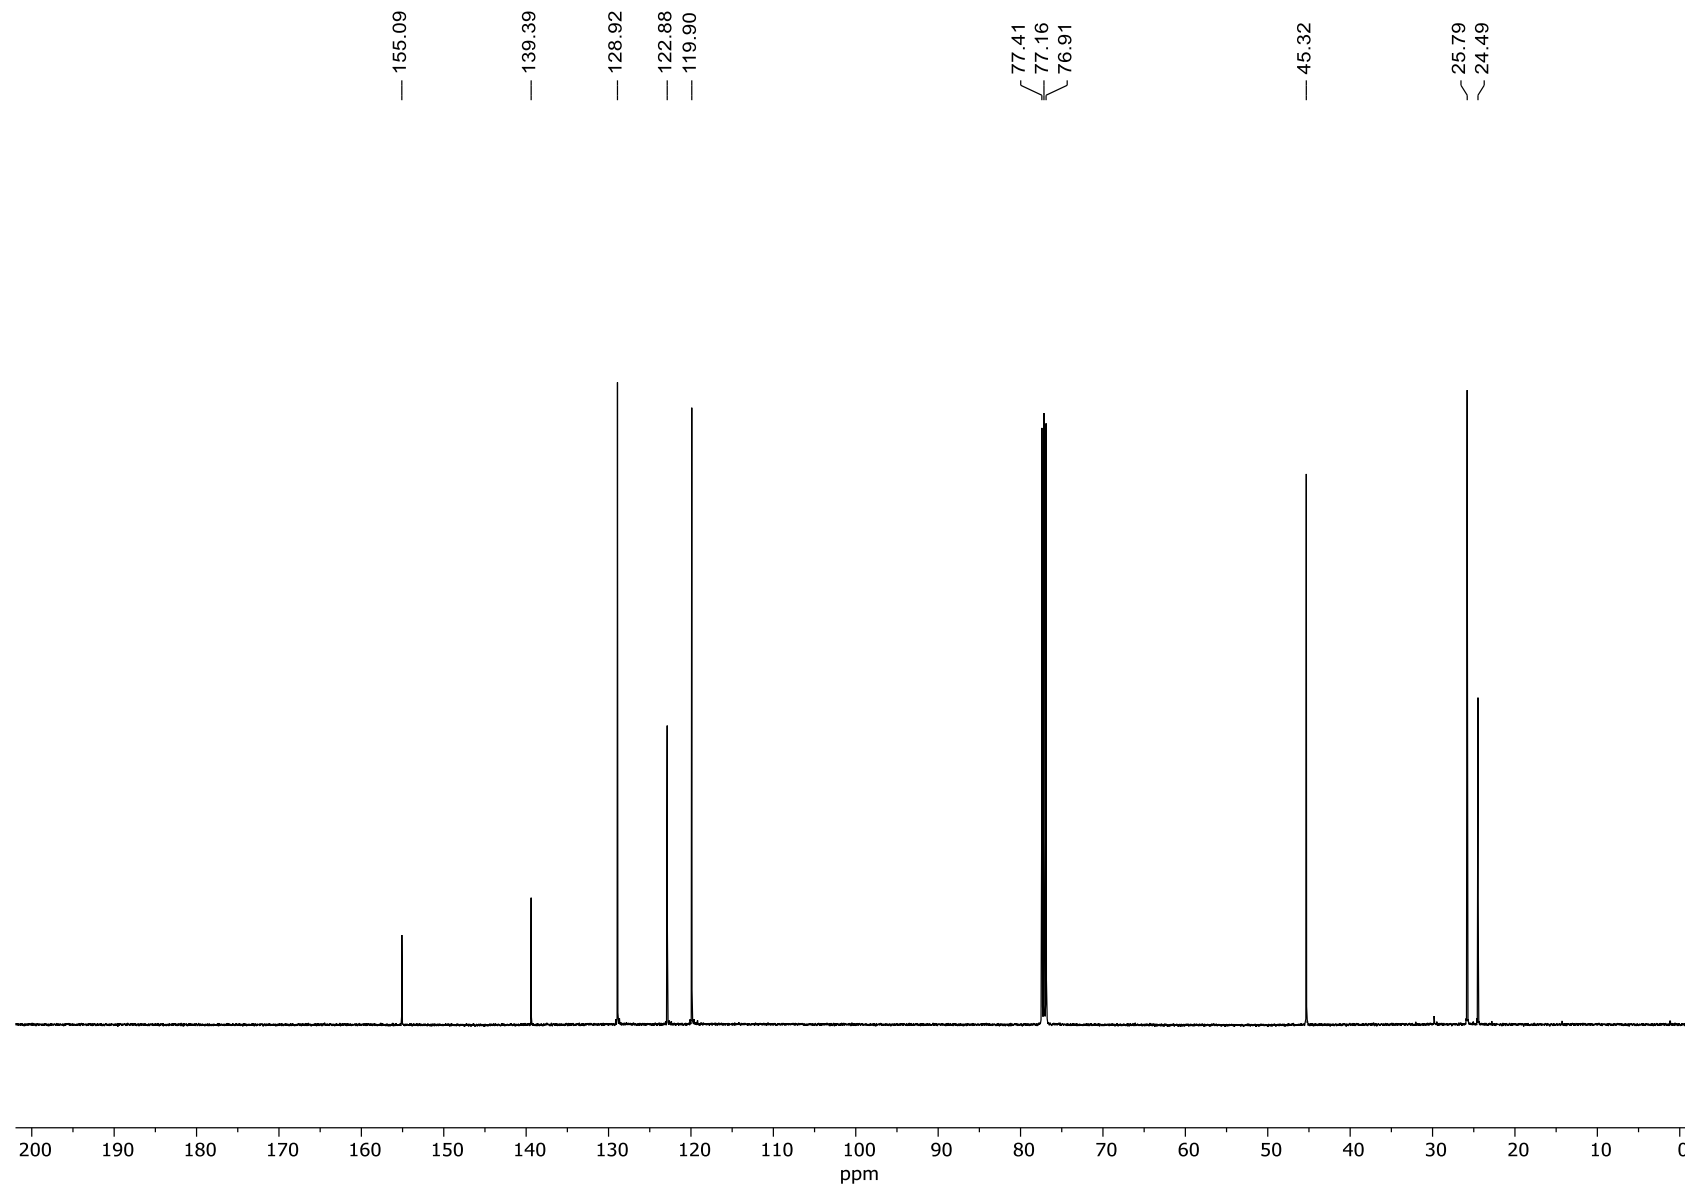

Figure S90:  $^1\text{H}$  NMR (500 MHz,  $\text{CDCl}_3$ , 298 K) spectrum of **5r**.

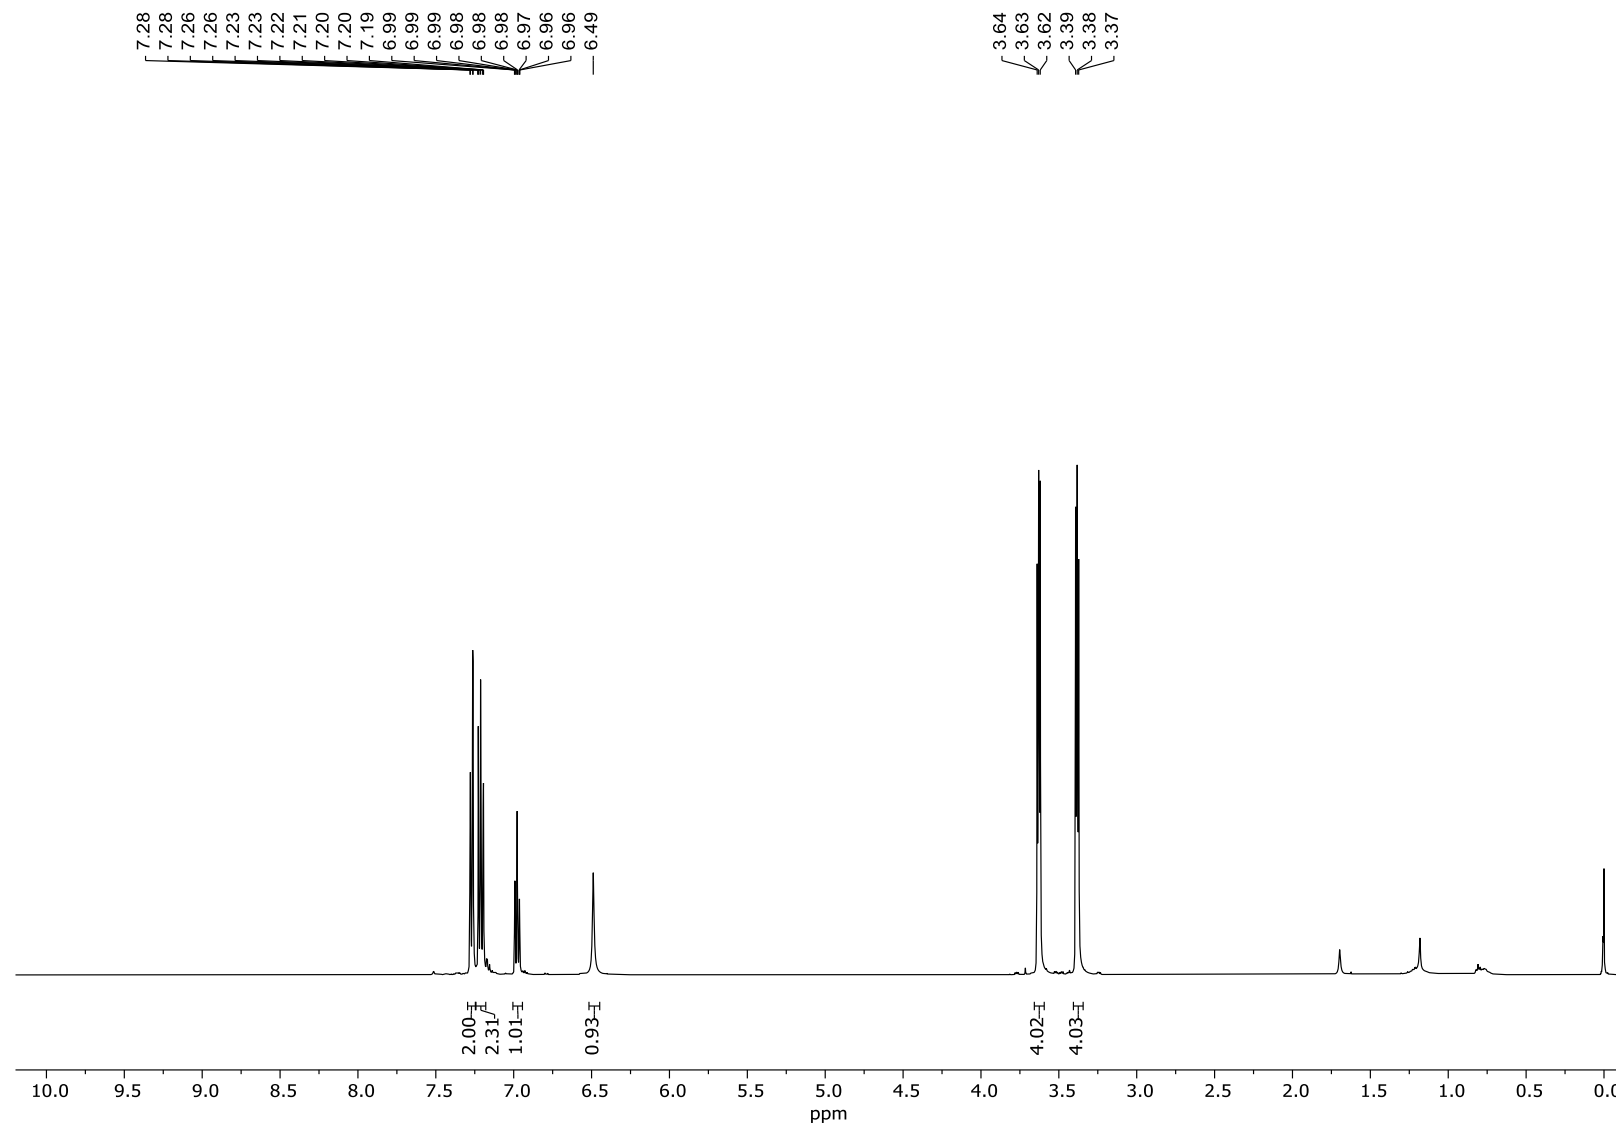

Figure S91:  $^{13}\text{C}$  NMR (101 MHz,  $\text{CDCl}_3$ , 298 K) spectrum of **5r**.

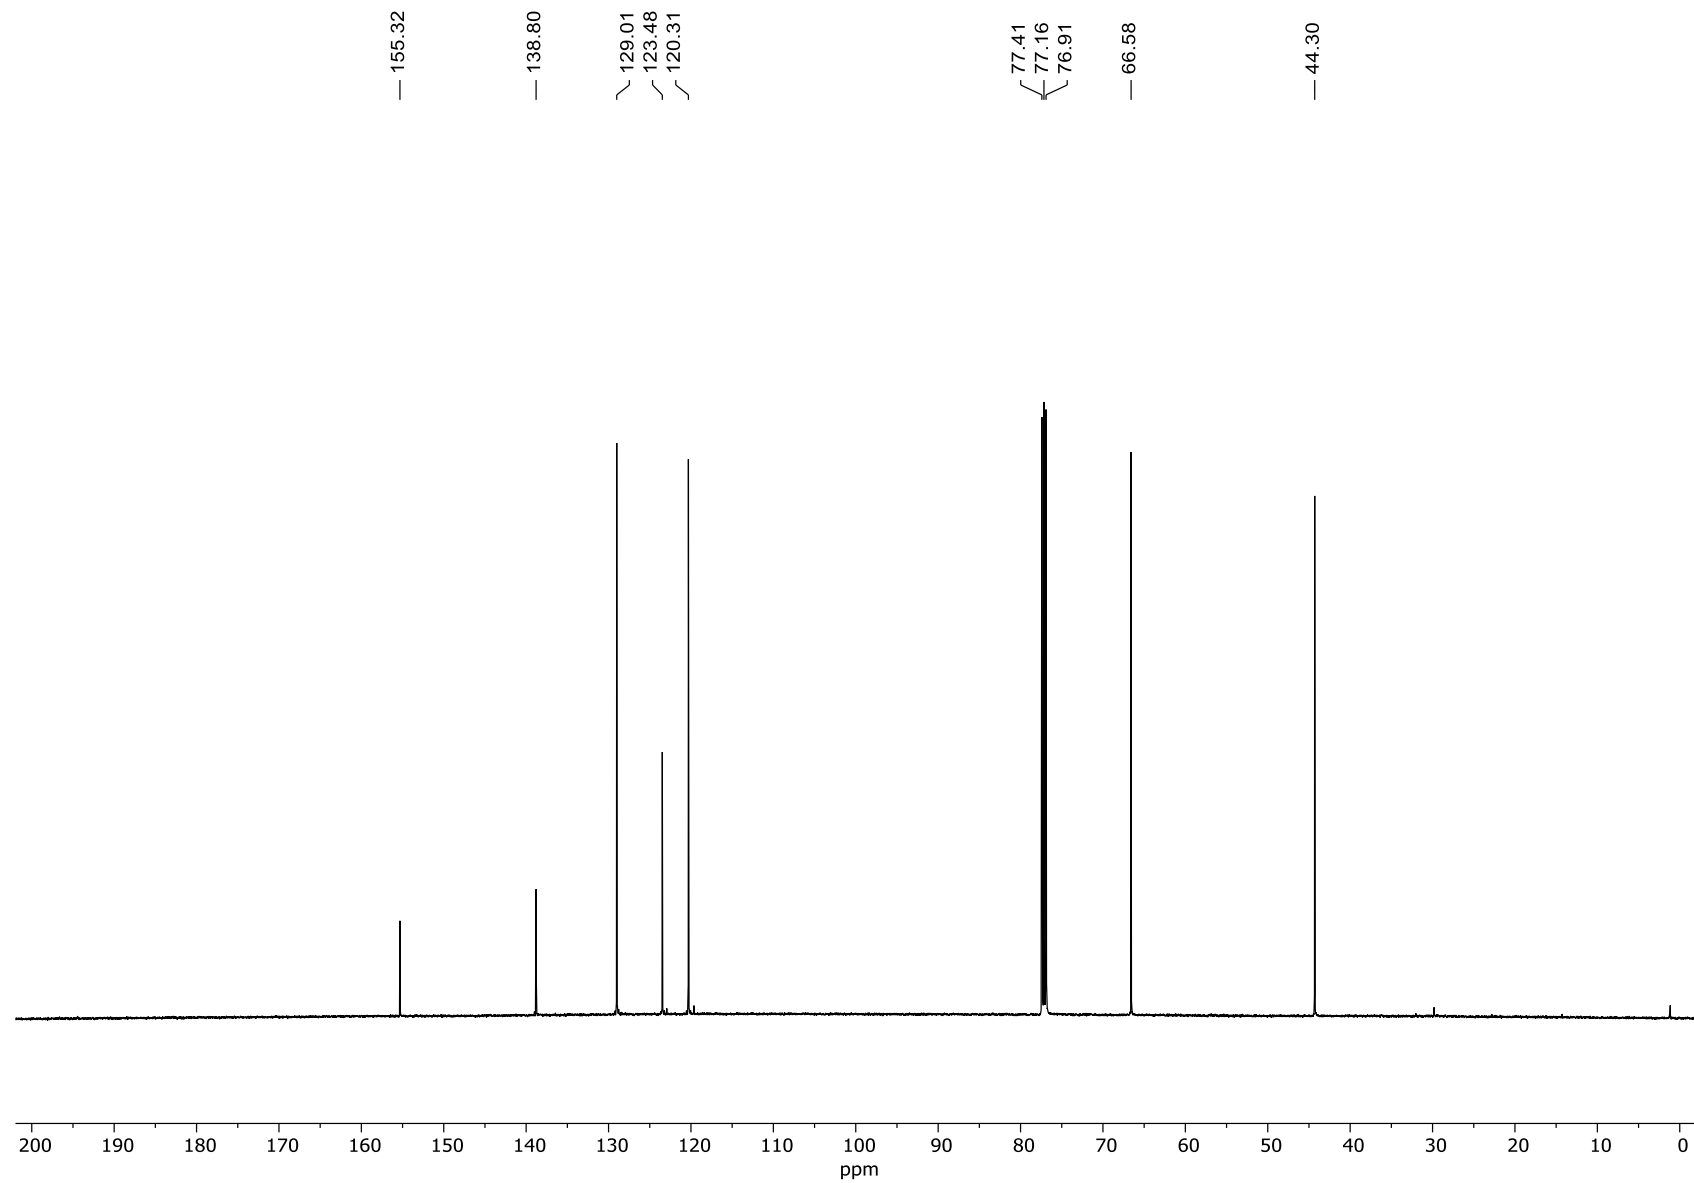



Figure S92:  $^1\text{H}$  NMR (500 MHz,  $\text{CDCl}_3$ , 298 K) spectrum of **5s**.

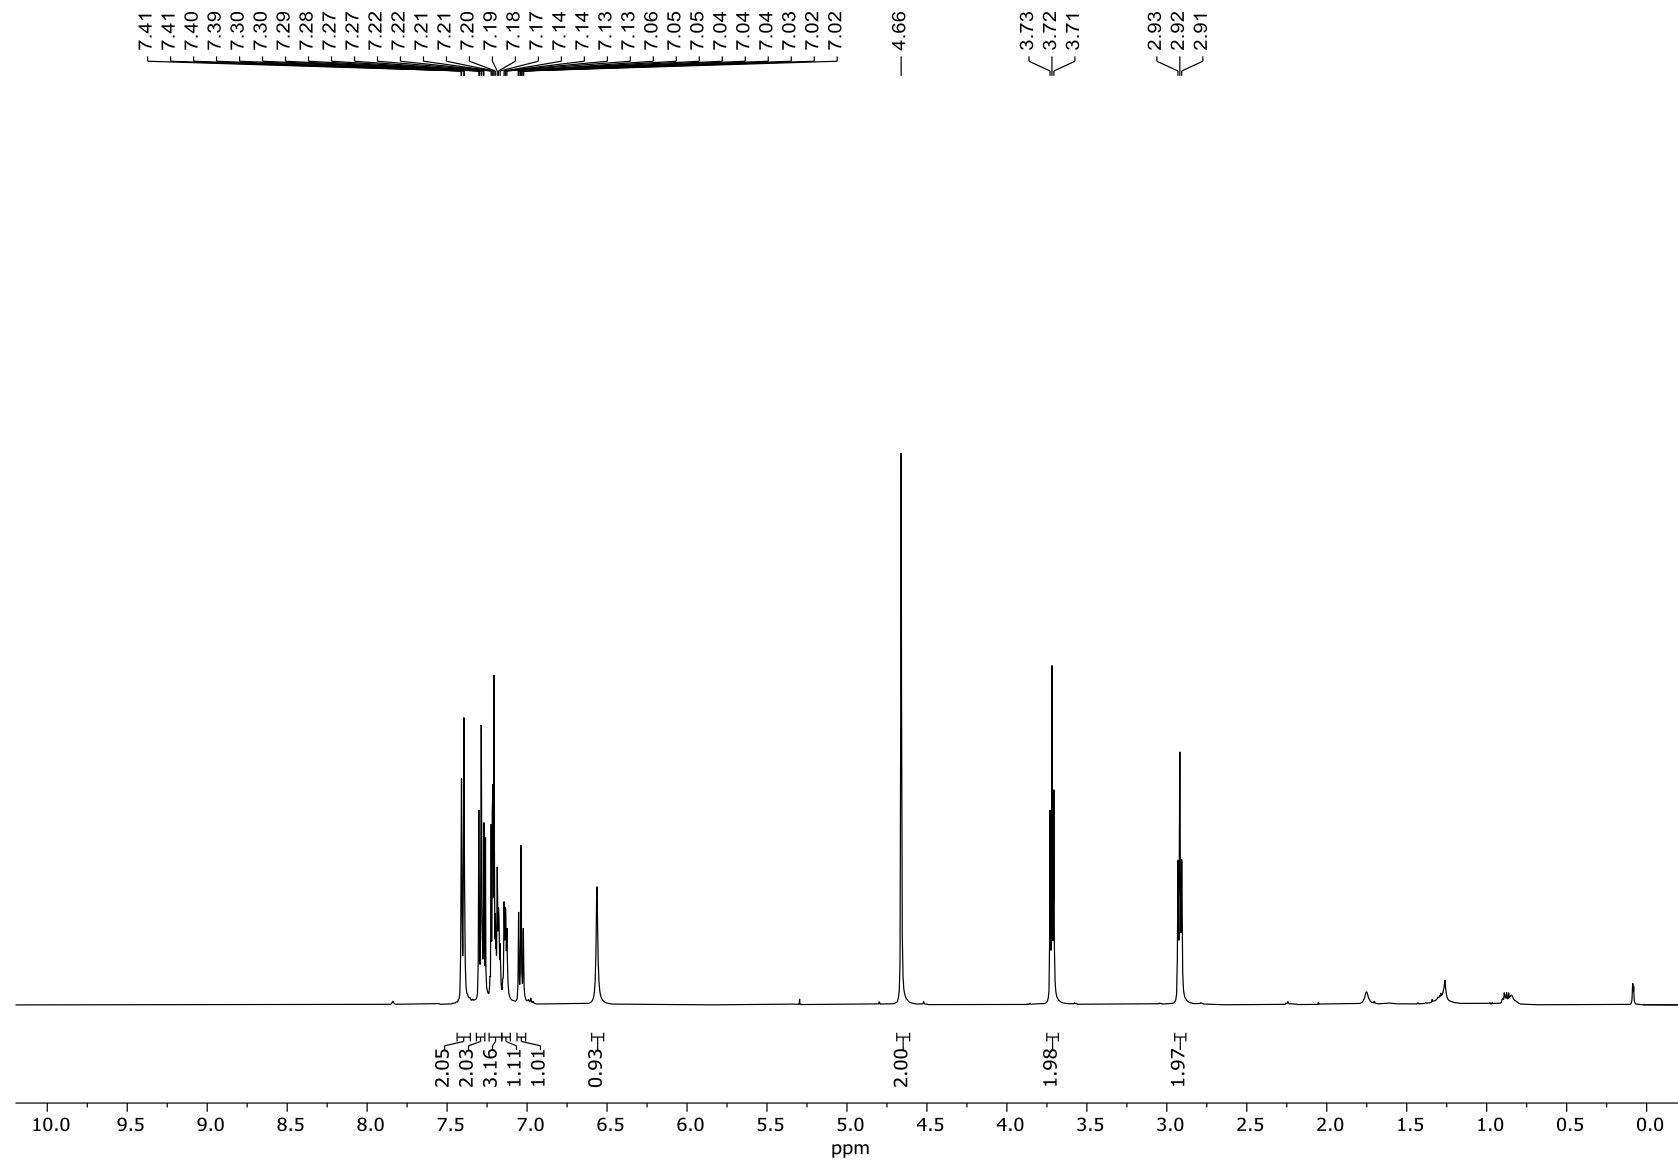

Figure S93:  $^{13}\text{C}$  NMR (126 MHz,  $\text{CDCl}_3$ , 298 K) spectrum of **5s**.

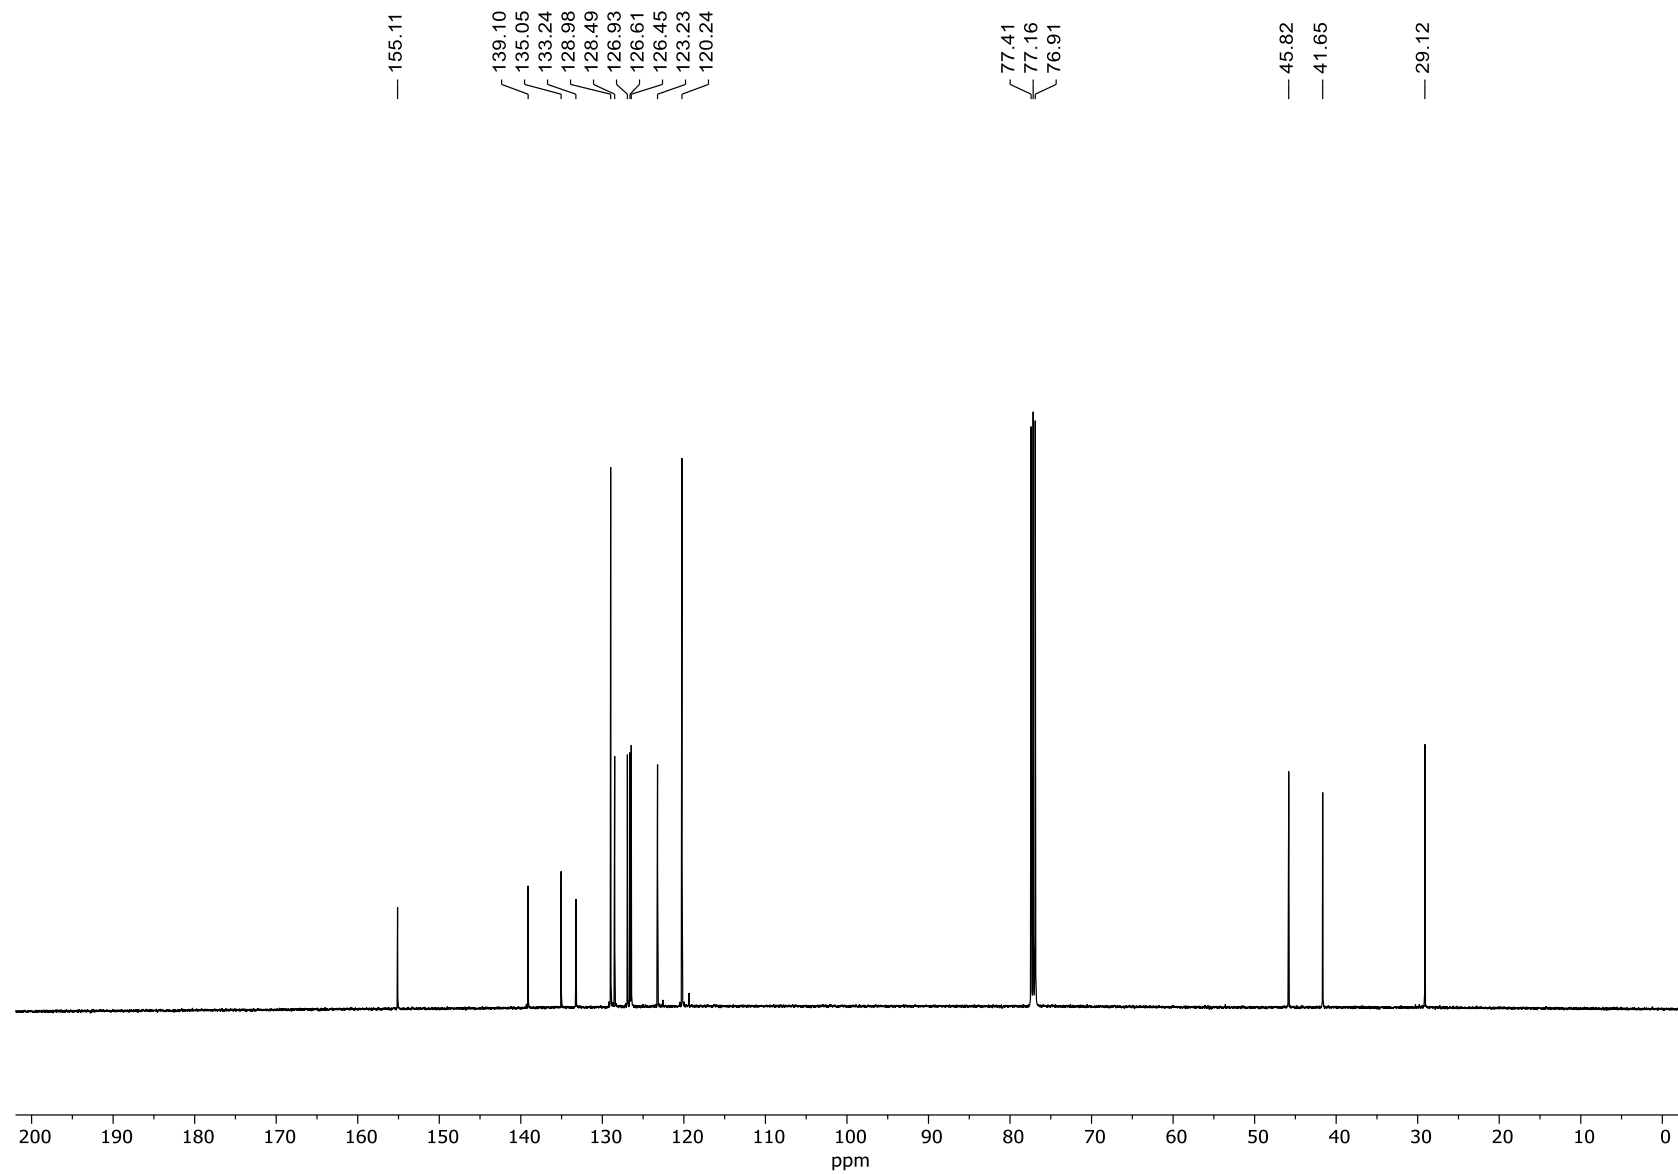

Figure S94:  $^1\text{H}$  NMR (500 MHz,  $\text{CDCl}_3$ , 298 K) spectrum of **5t**.

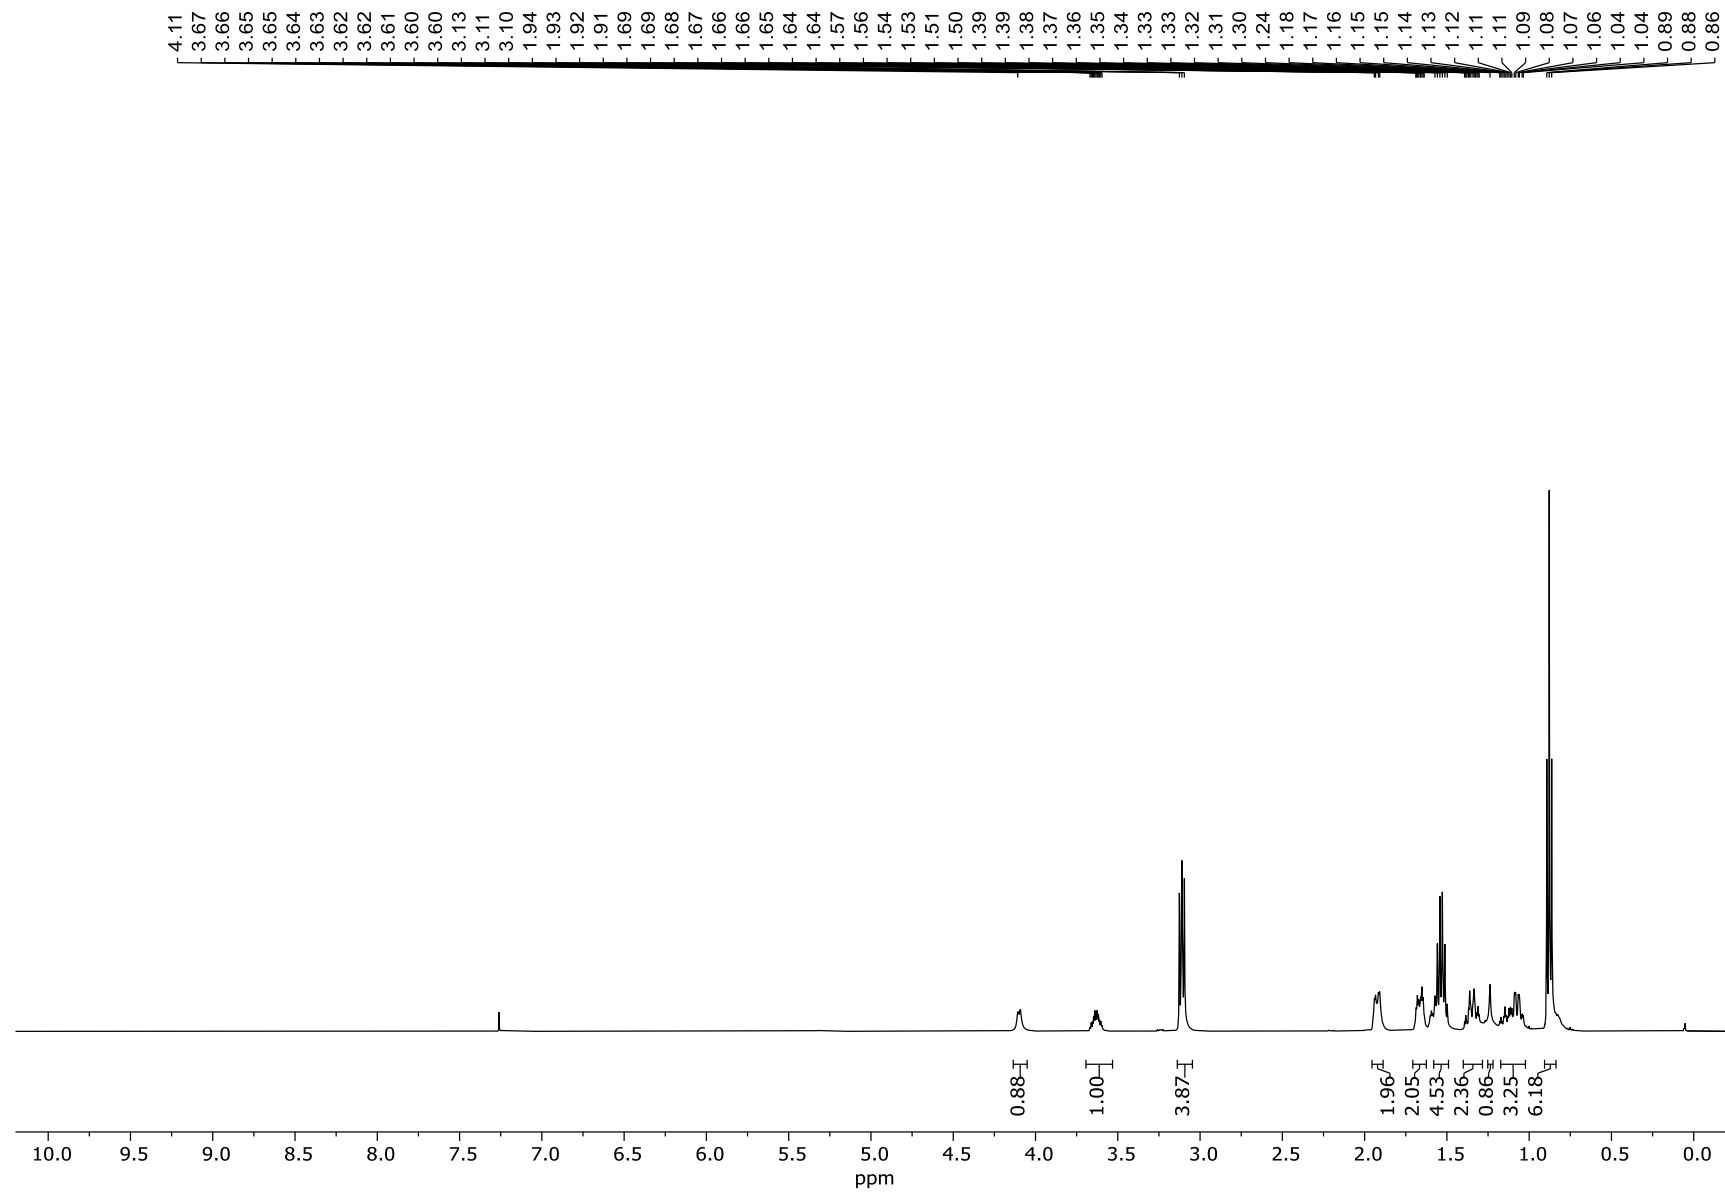

Figure S95:  $^{13}\text{C}$  NMR (126 MHz,  $\text{CDCl}_3$ , 298 K) spectrum of **5t**.

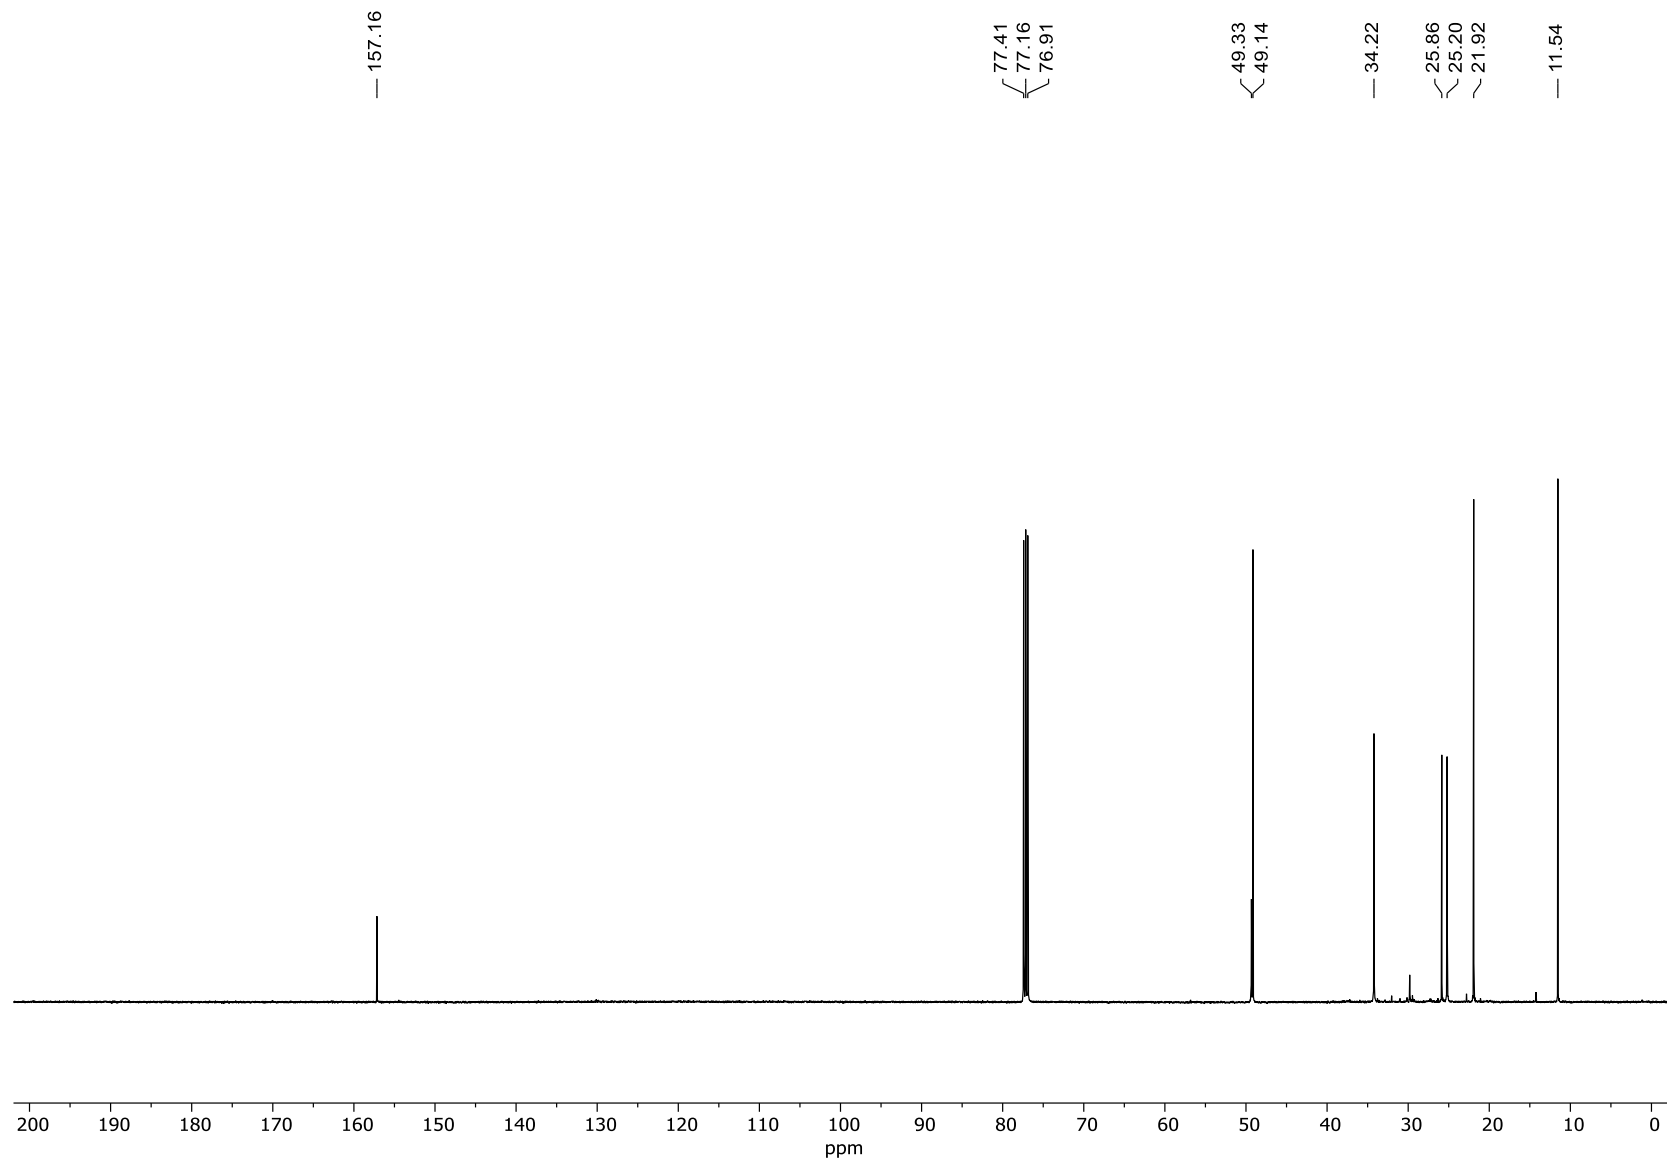

Figure S96:  $^1\text{H}$  NMR (500 MHz,  $\text{CDCl}_3$ , 298 K) spectrum of **5u**.

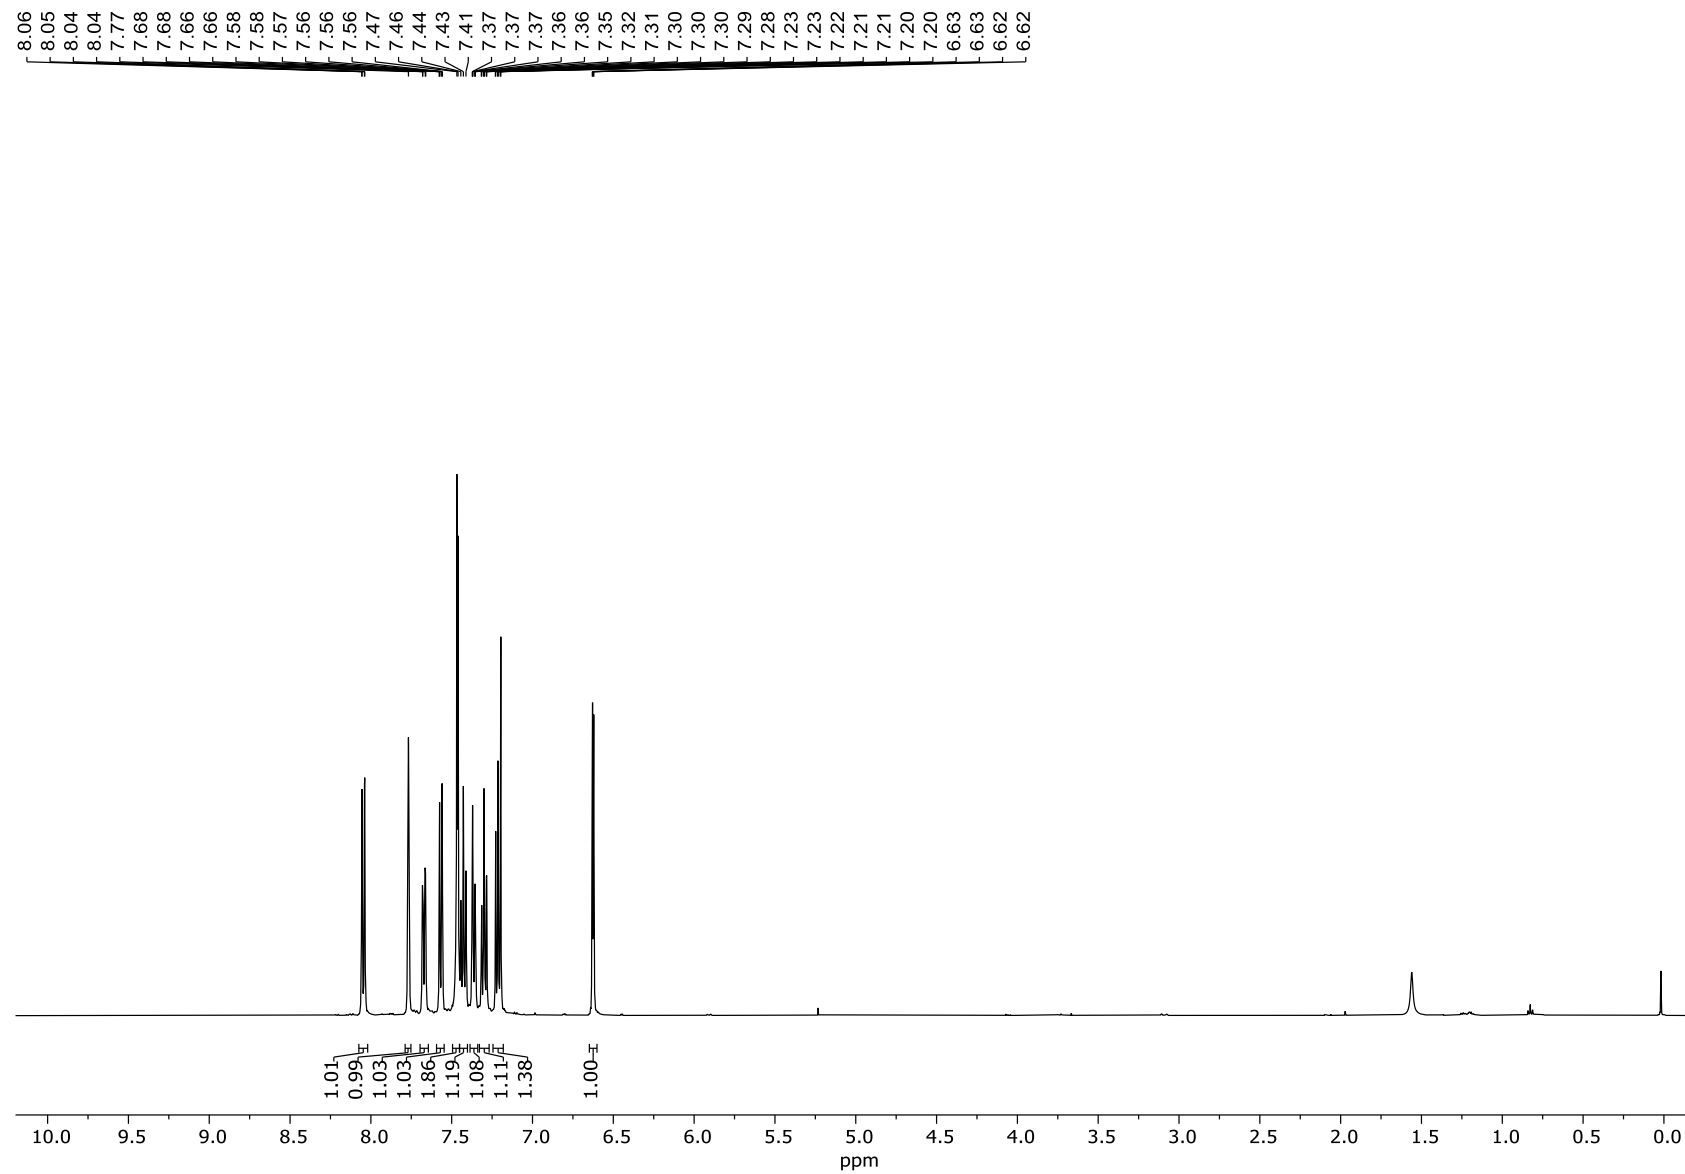

Figure S97:  $^{13}\text{C}$  NMR (126 MHz,  $\text{CDCl}_3$ , 298 K) spectrum of **5u**.

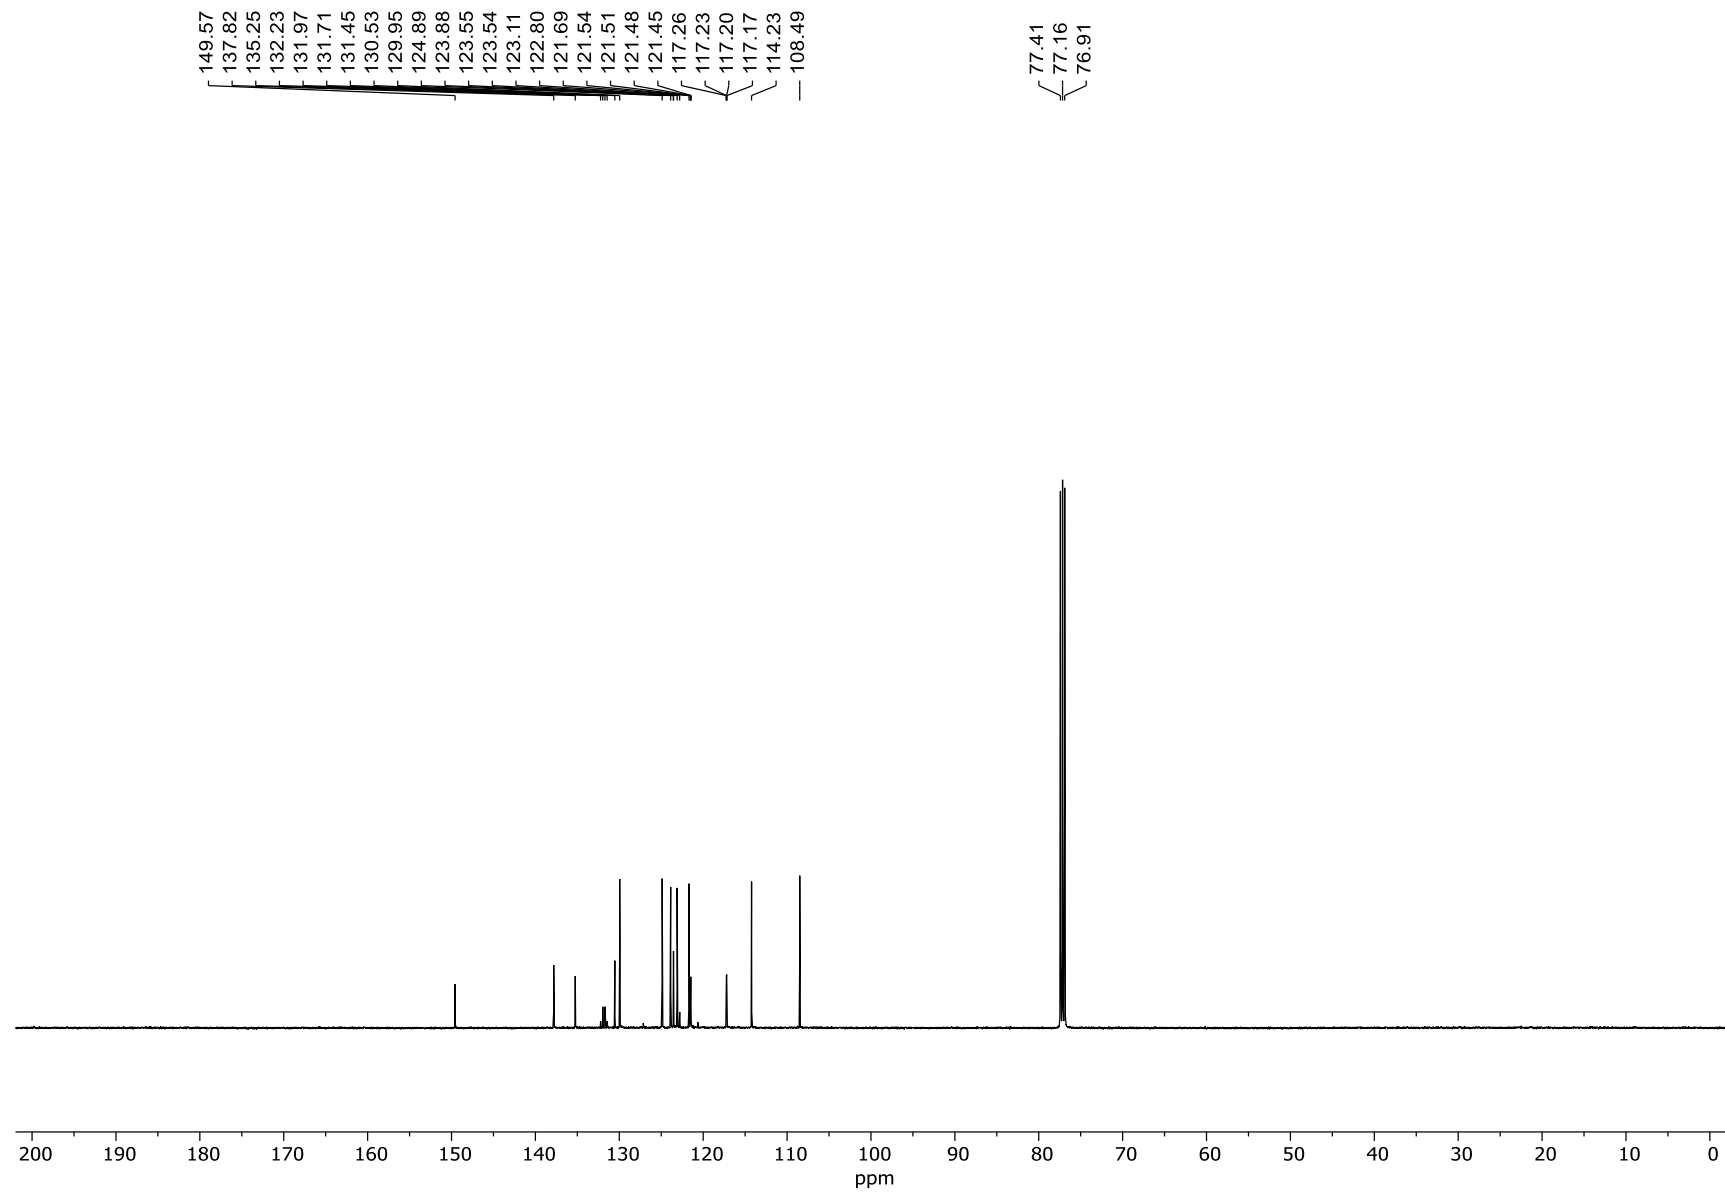

Figure S98:  $^{19}\text{F}$  NMR (471 MHz,  $\text{CDCl}_3$ , 298 K) spectrum of **5u**.

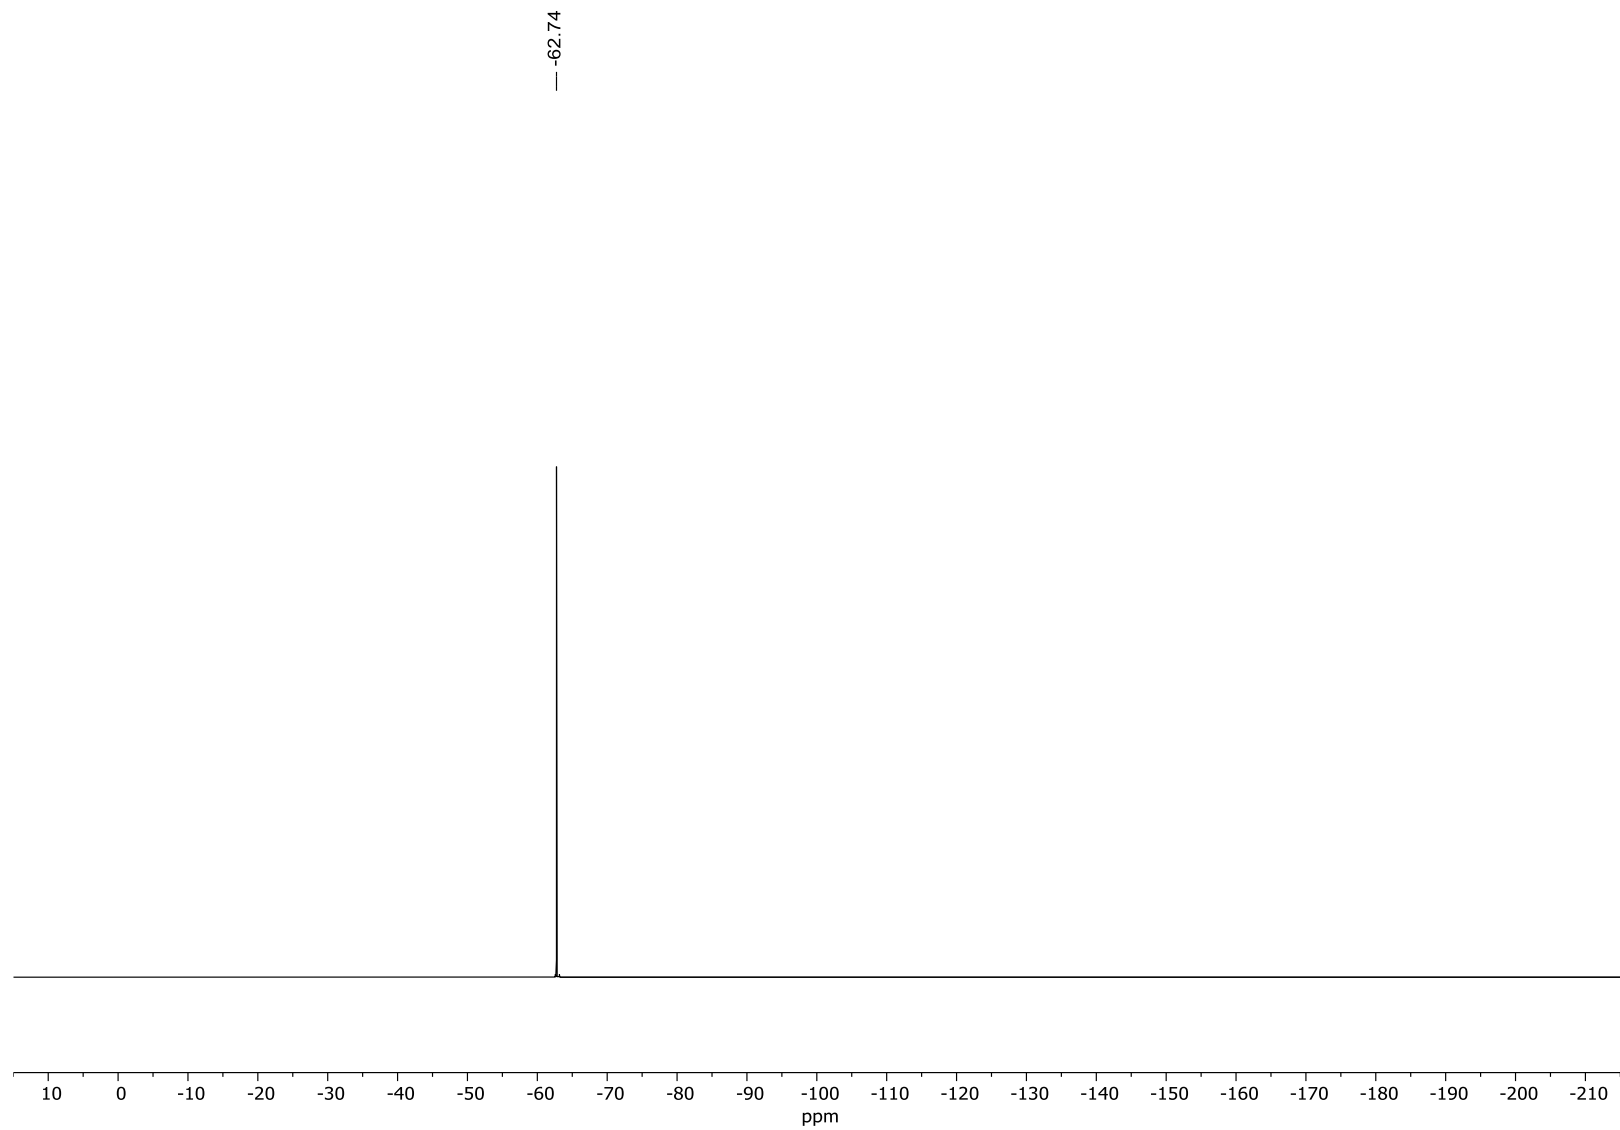

Figure S99:  $^1\text{H}$  NMR (600 MHz,  $\text{CDCl}_3$ , 298 K) spectrum of **6a**.

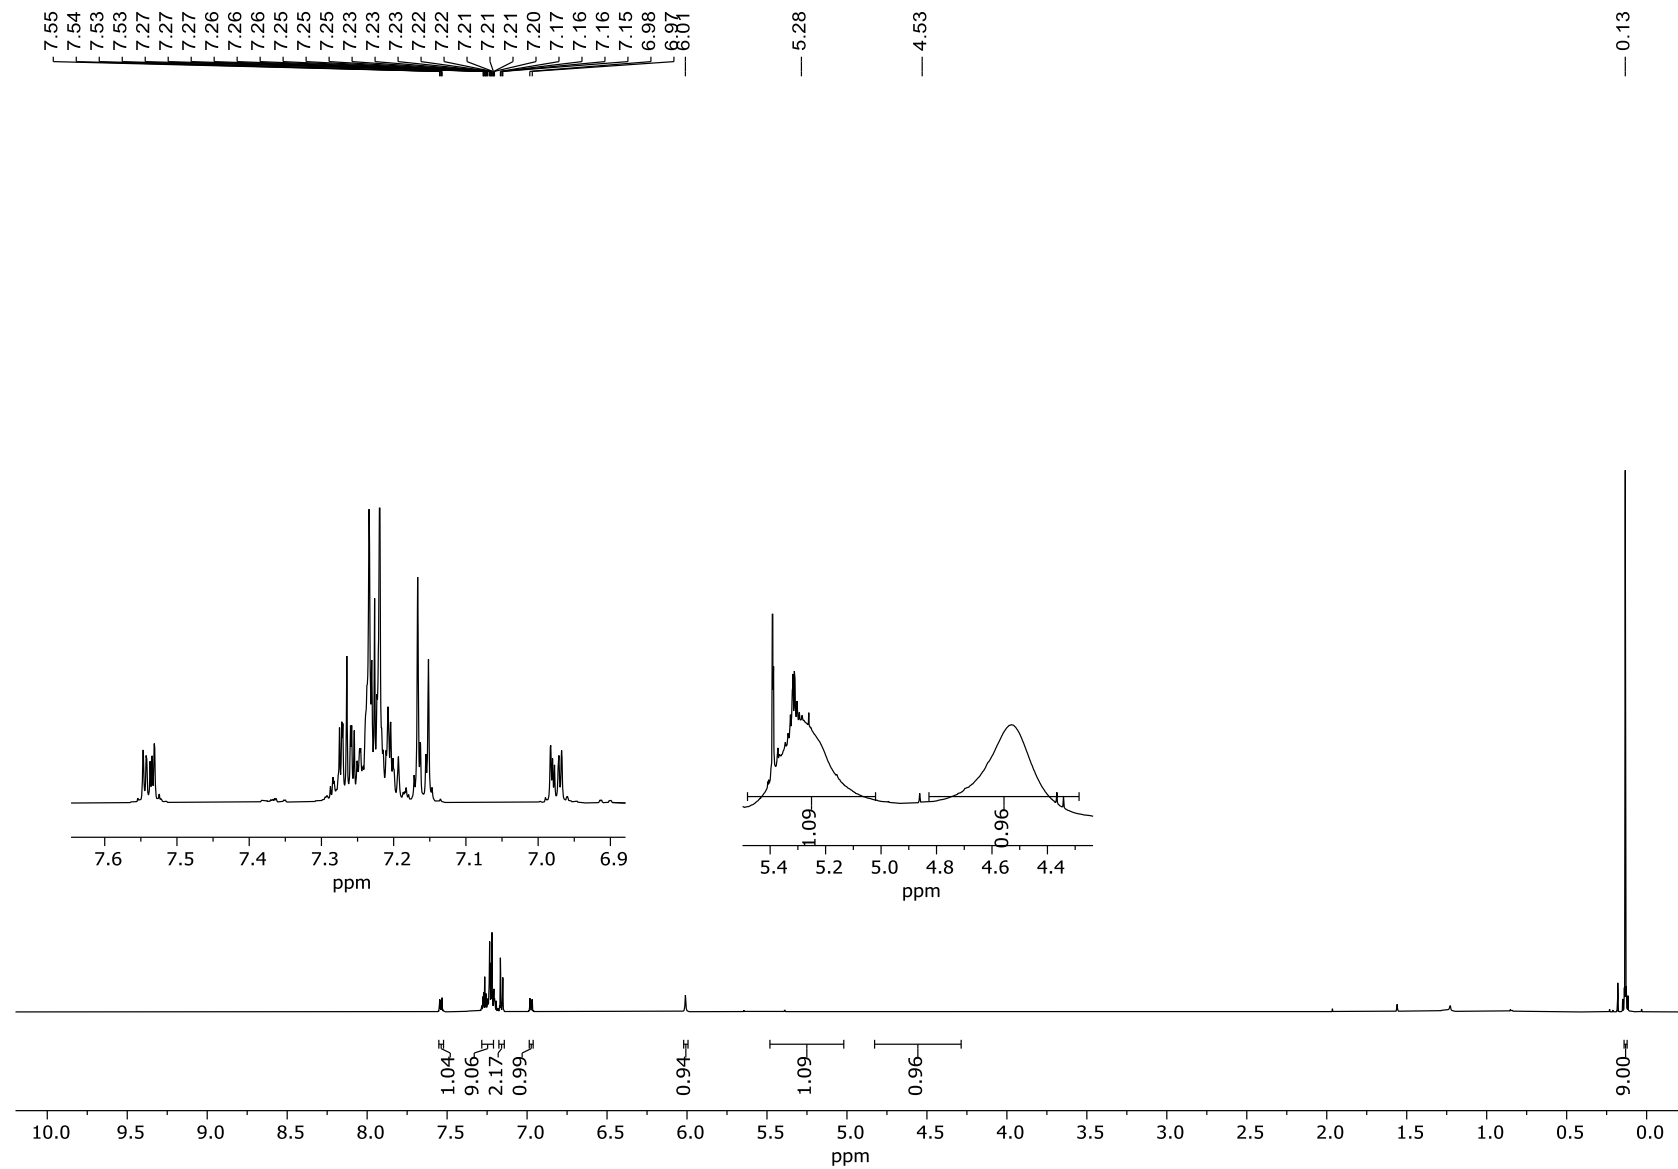



Figure S100:  $^{13}\text{C}$  NMR (151 MHz,  $\text{CDCl}_3$ , 298 K) spectrum of **6a**.

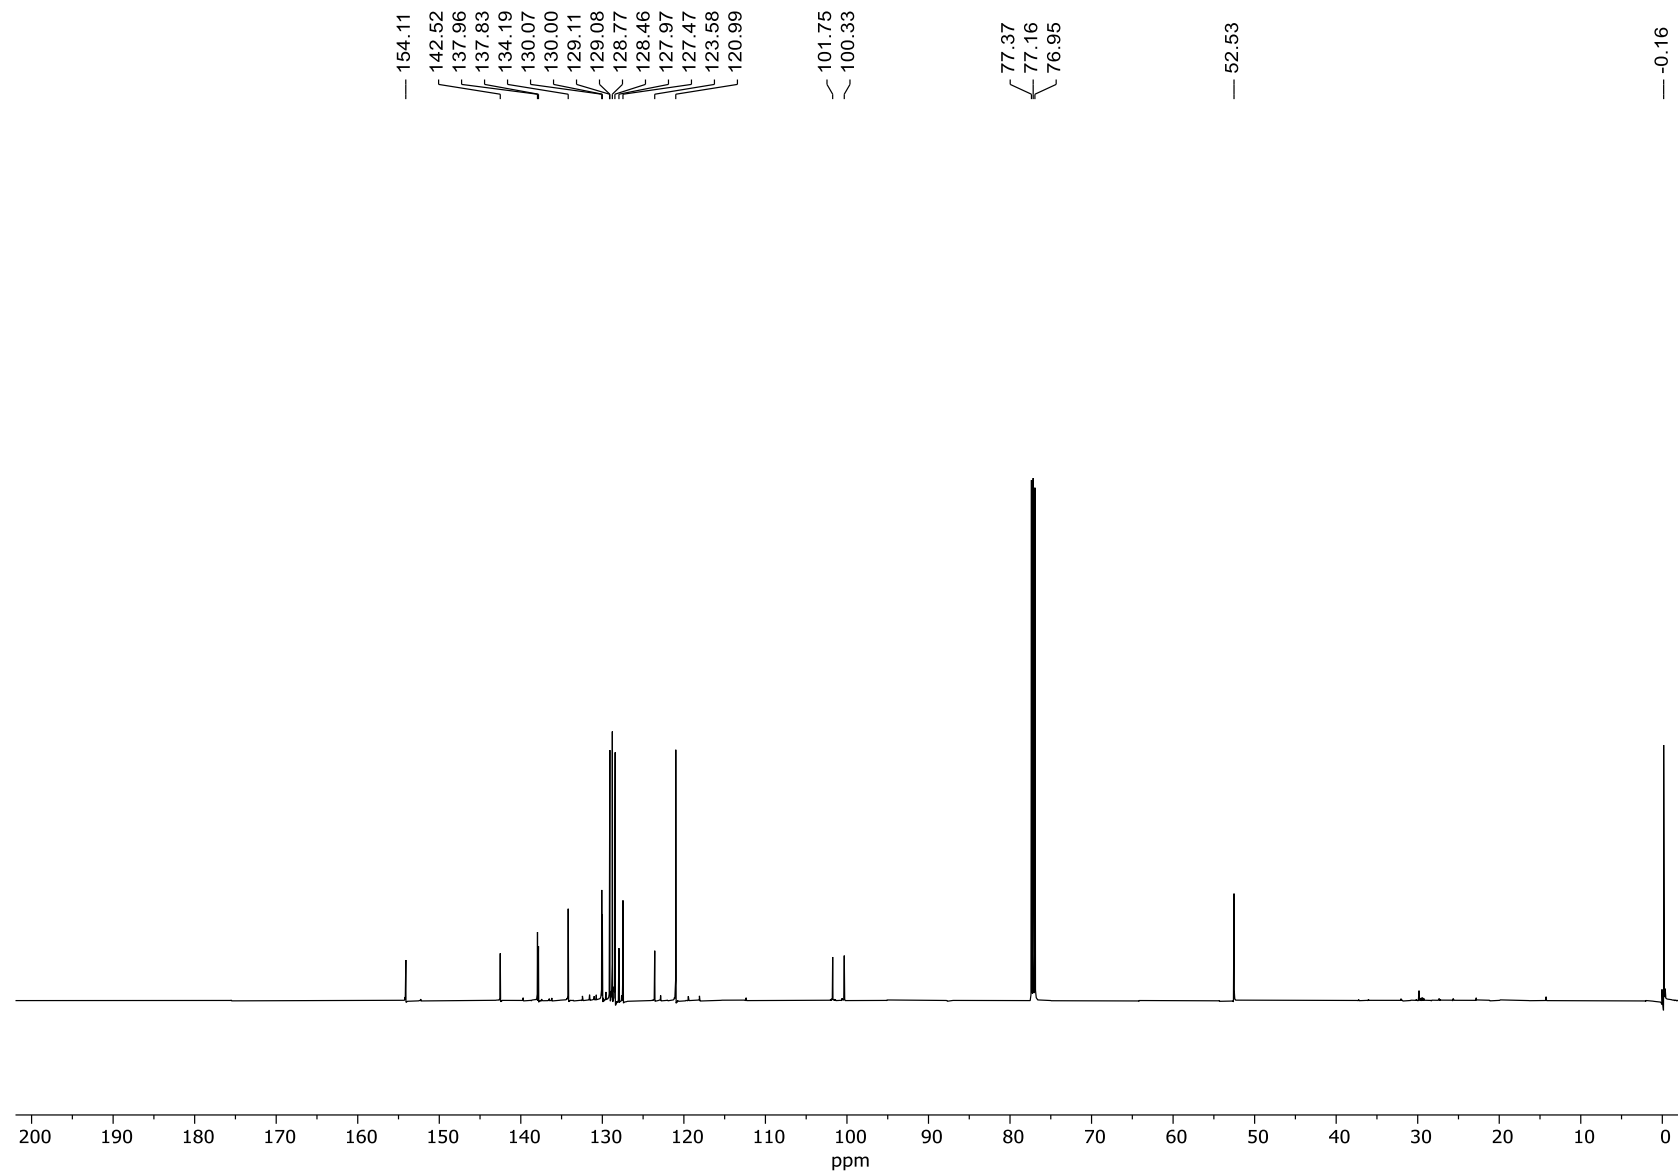

Figure S101: HSQC NMR (600 MHz, CDCl<sub>3</sub>, 298 K) spectrum of **6a**.

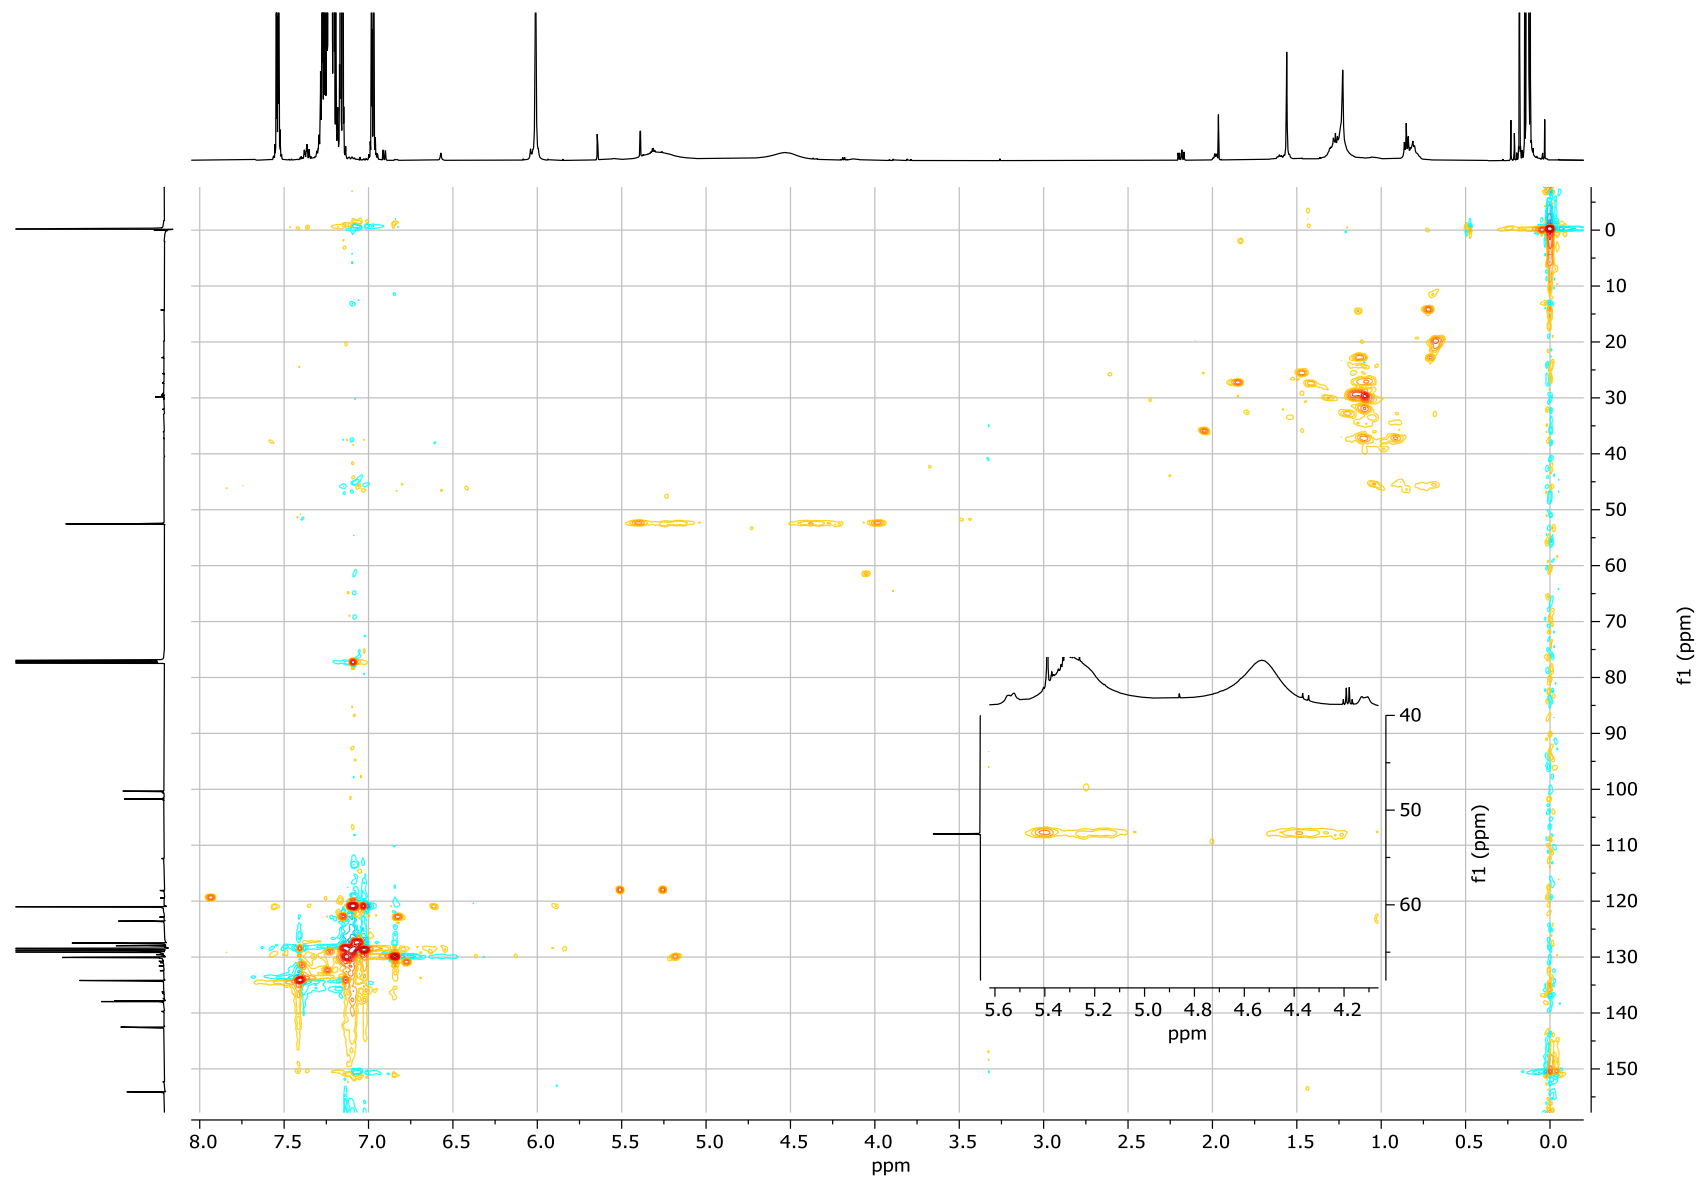

Figure S102:  $^1\text{H}$  NMR (500 MHz,  $\text{CDCl}_3$ , 298 K) spectrum of **6b**.

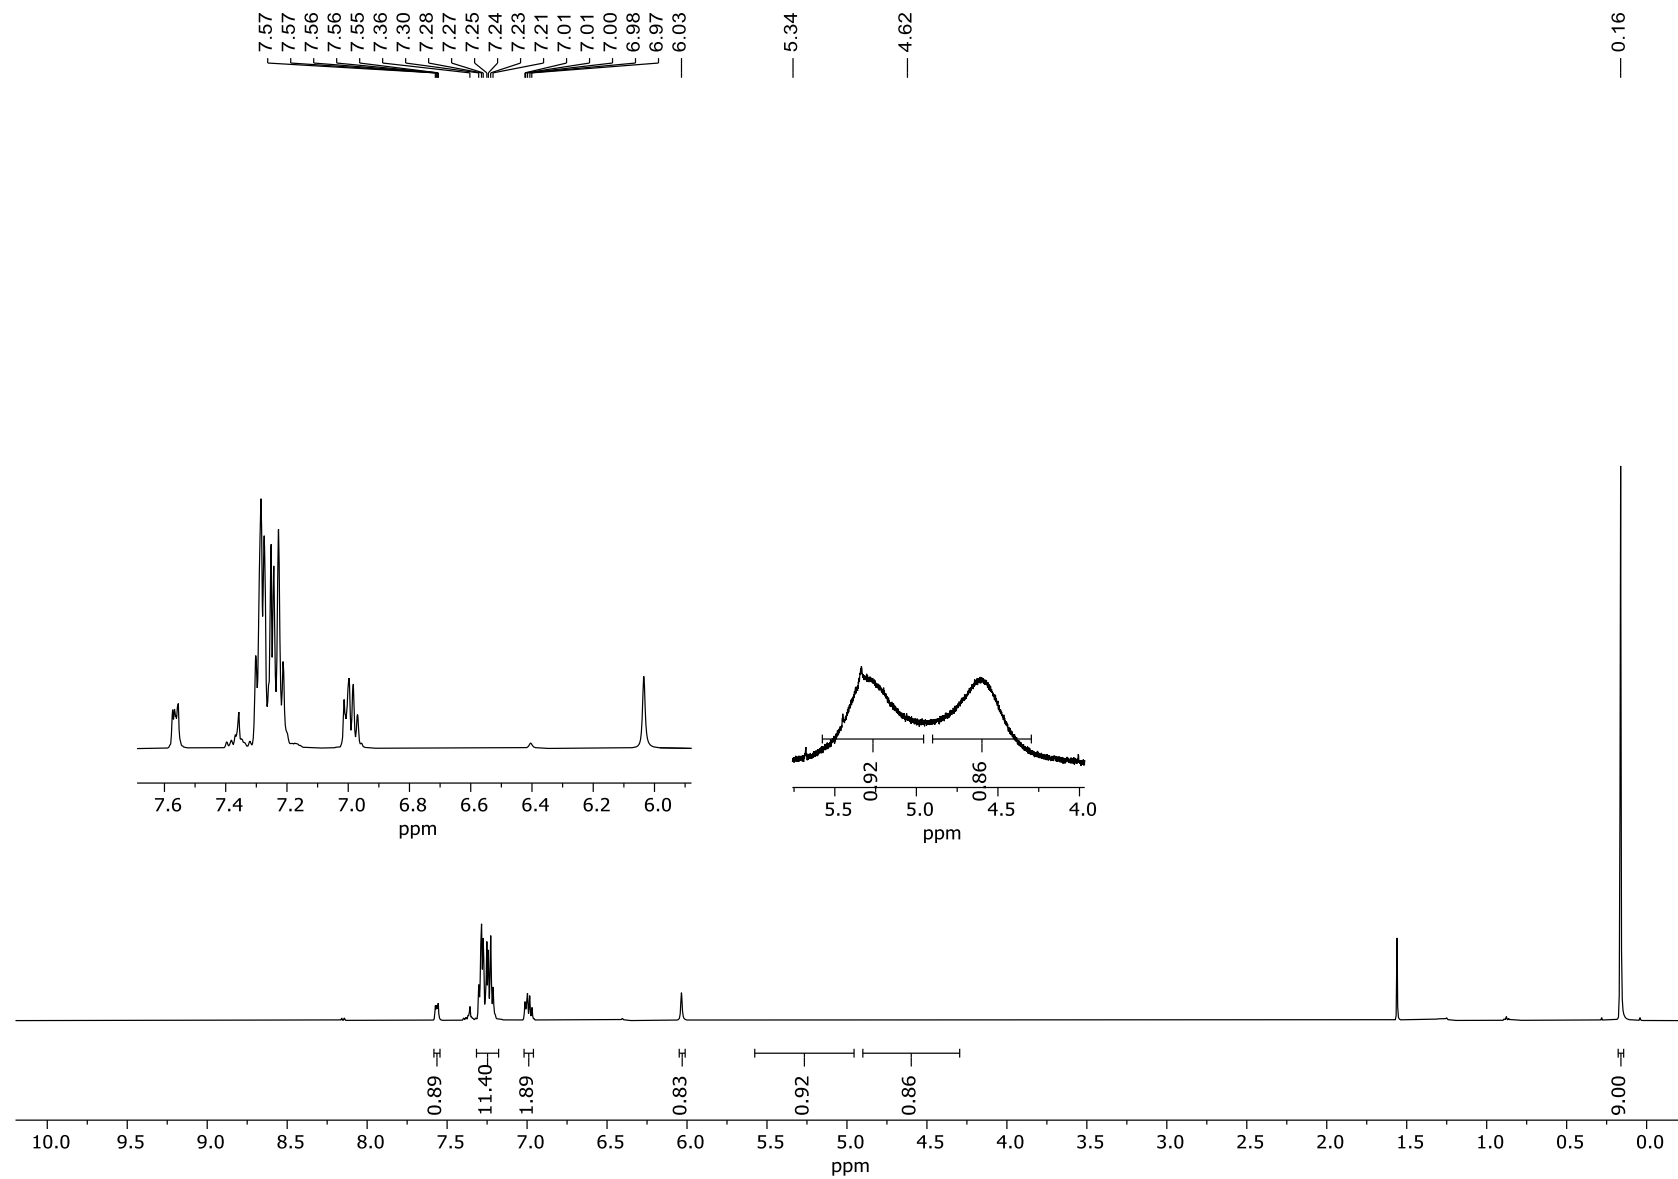

Figure S103:  $^{13}\text{C}$  NMR (126 MHz,  $\text{CDCl}_3$ , 298 K) spectrum of **6b**.

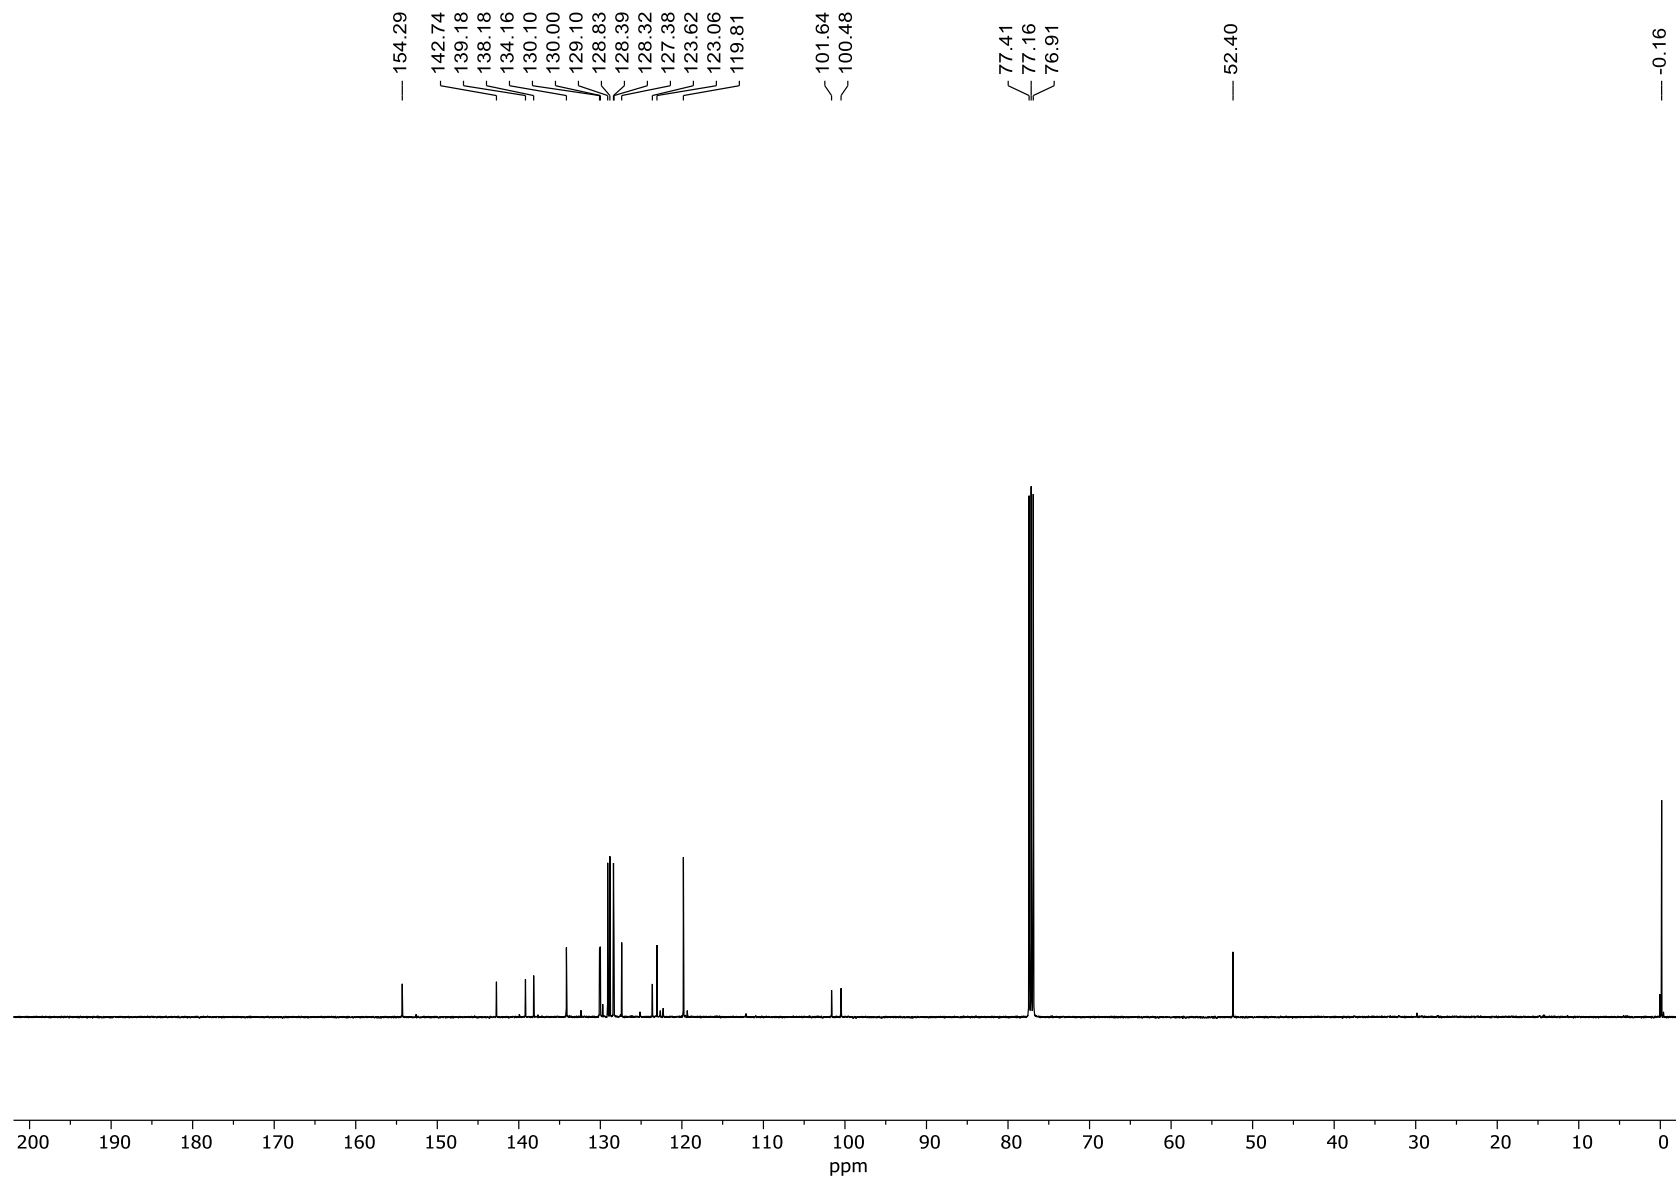

Figure S104:  $^1\text{H}$  NMR (500 MHz,  $\text{CDCl}_3$ , 298 K) spectrum of **6c**.

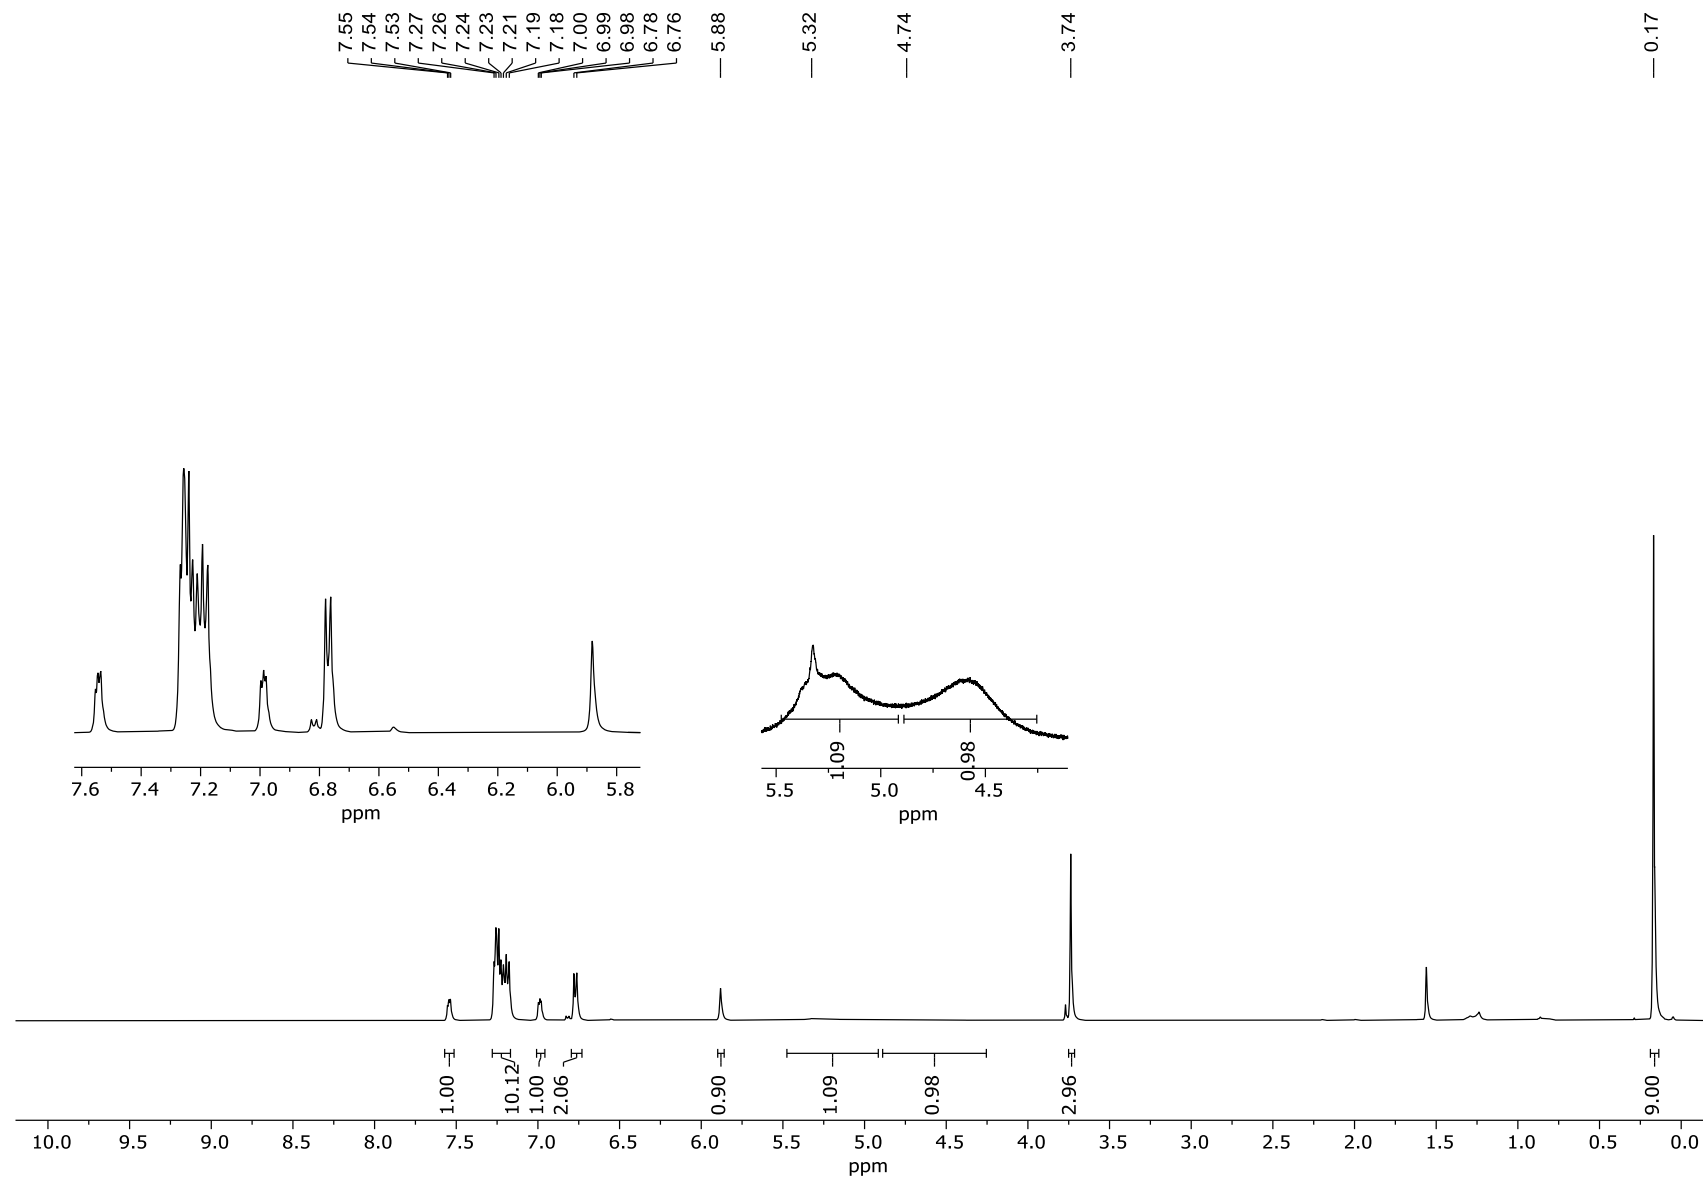

Figure S105:  $^{13}\text{C}$  NMR (126 MHz,  $\text{CDCl}_3$ , 298 K) spectrum of **6c**.

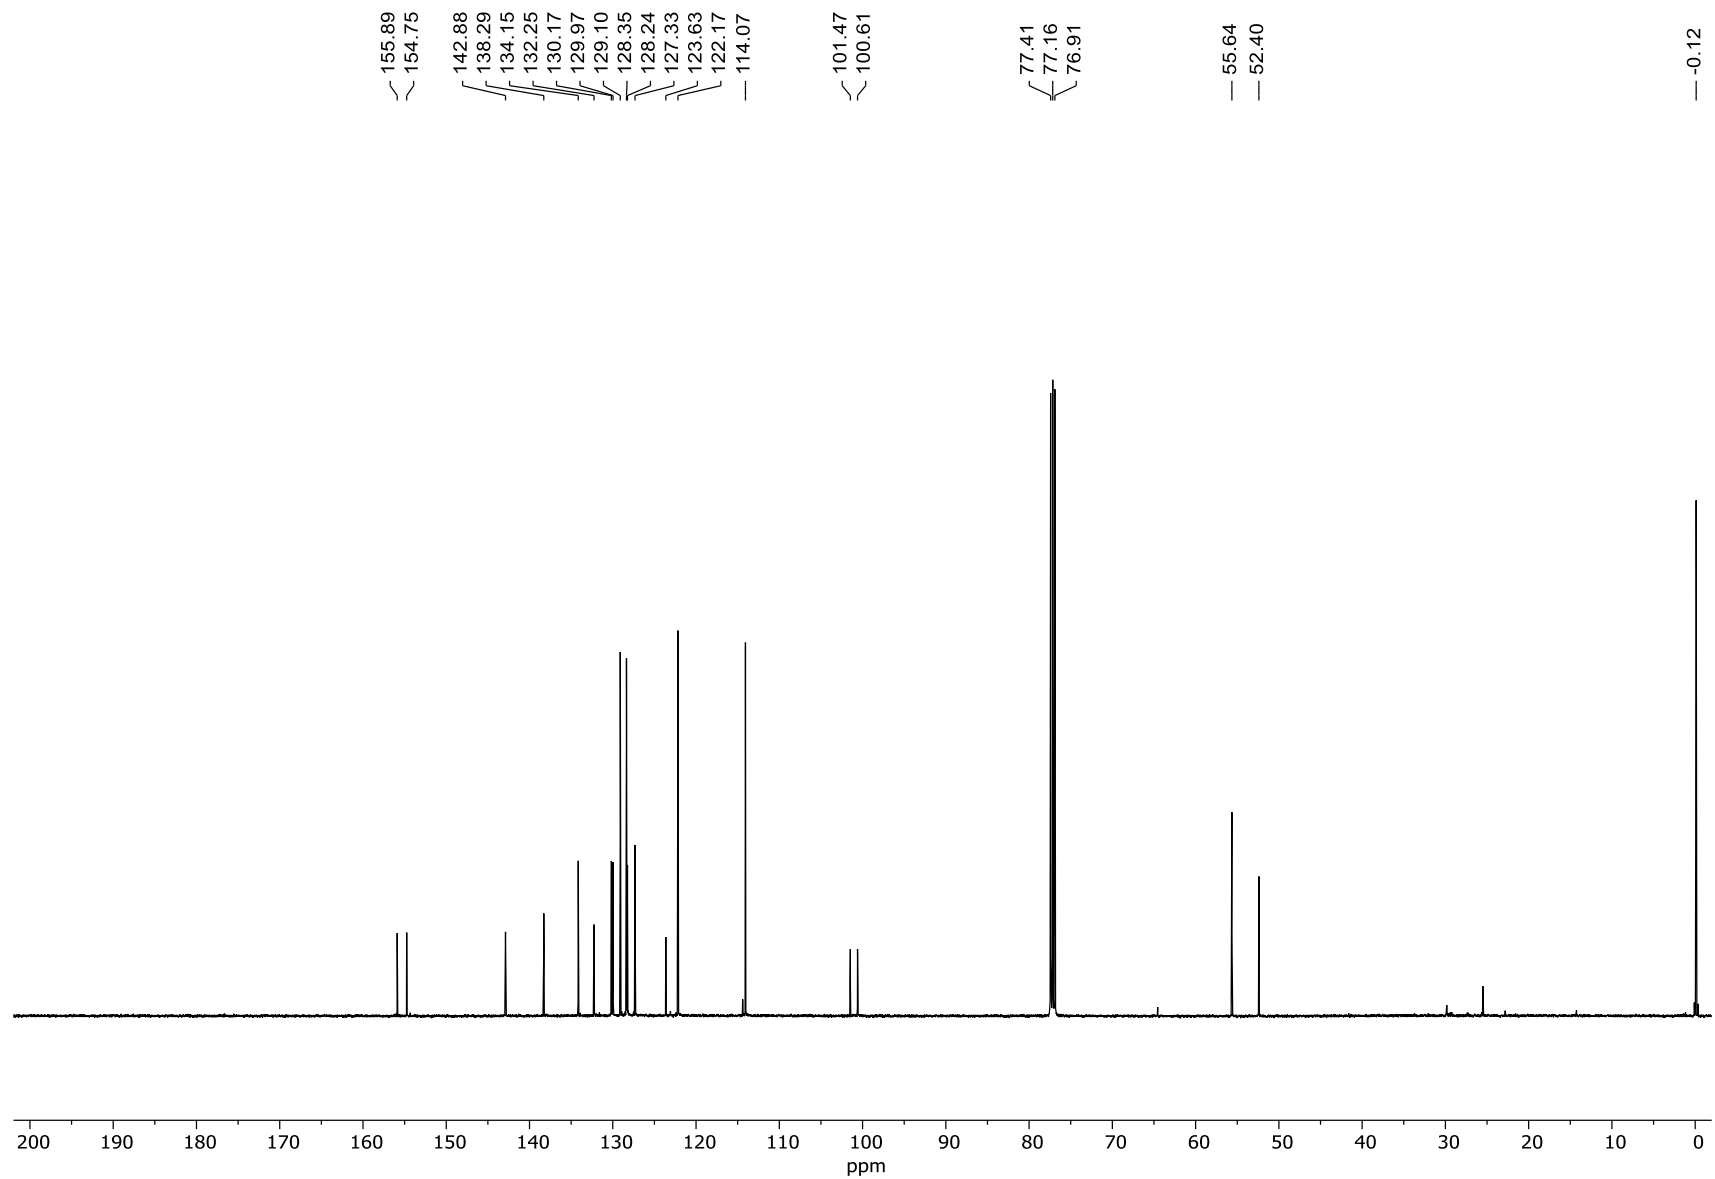

Figure S106:  $^1\text{H}$  NMR (500 MHz,  $\text{CDCl}_3$ , 298 K) spectrum of **6d**.

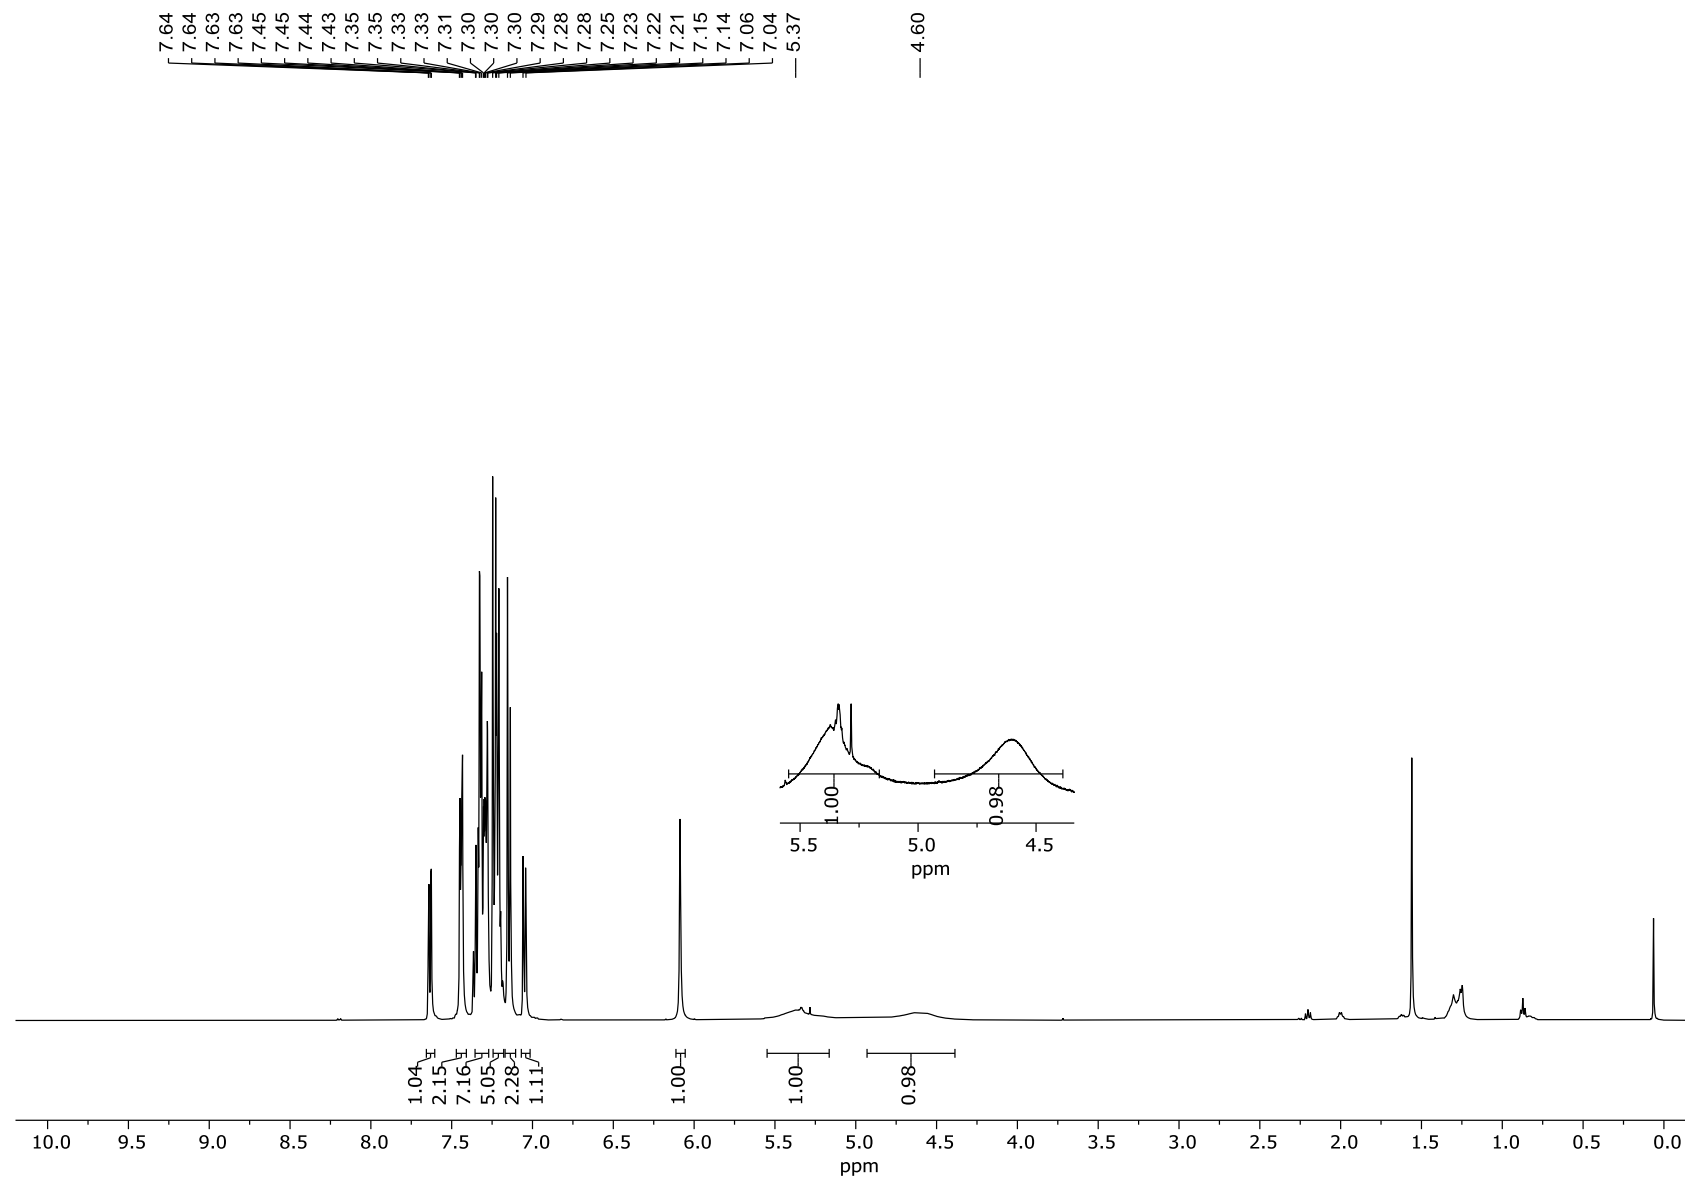

Figure S107:  $^{13}\text{C}$  NMR (126 MHz,  $\text{CDCl}_3$ , 298 K) spectrum of **6d**.

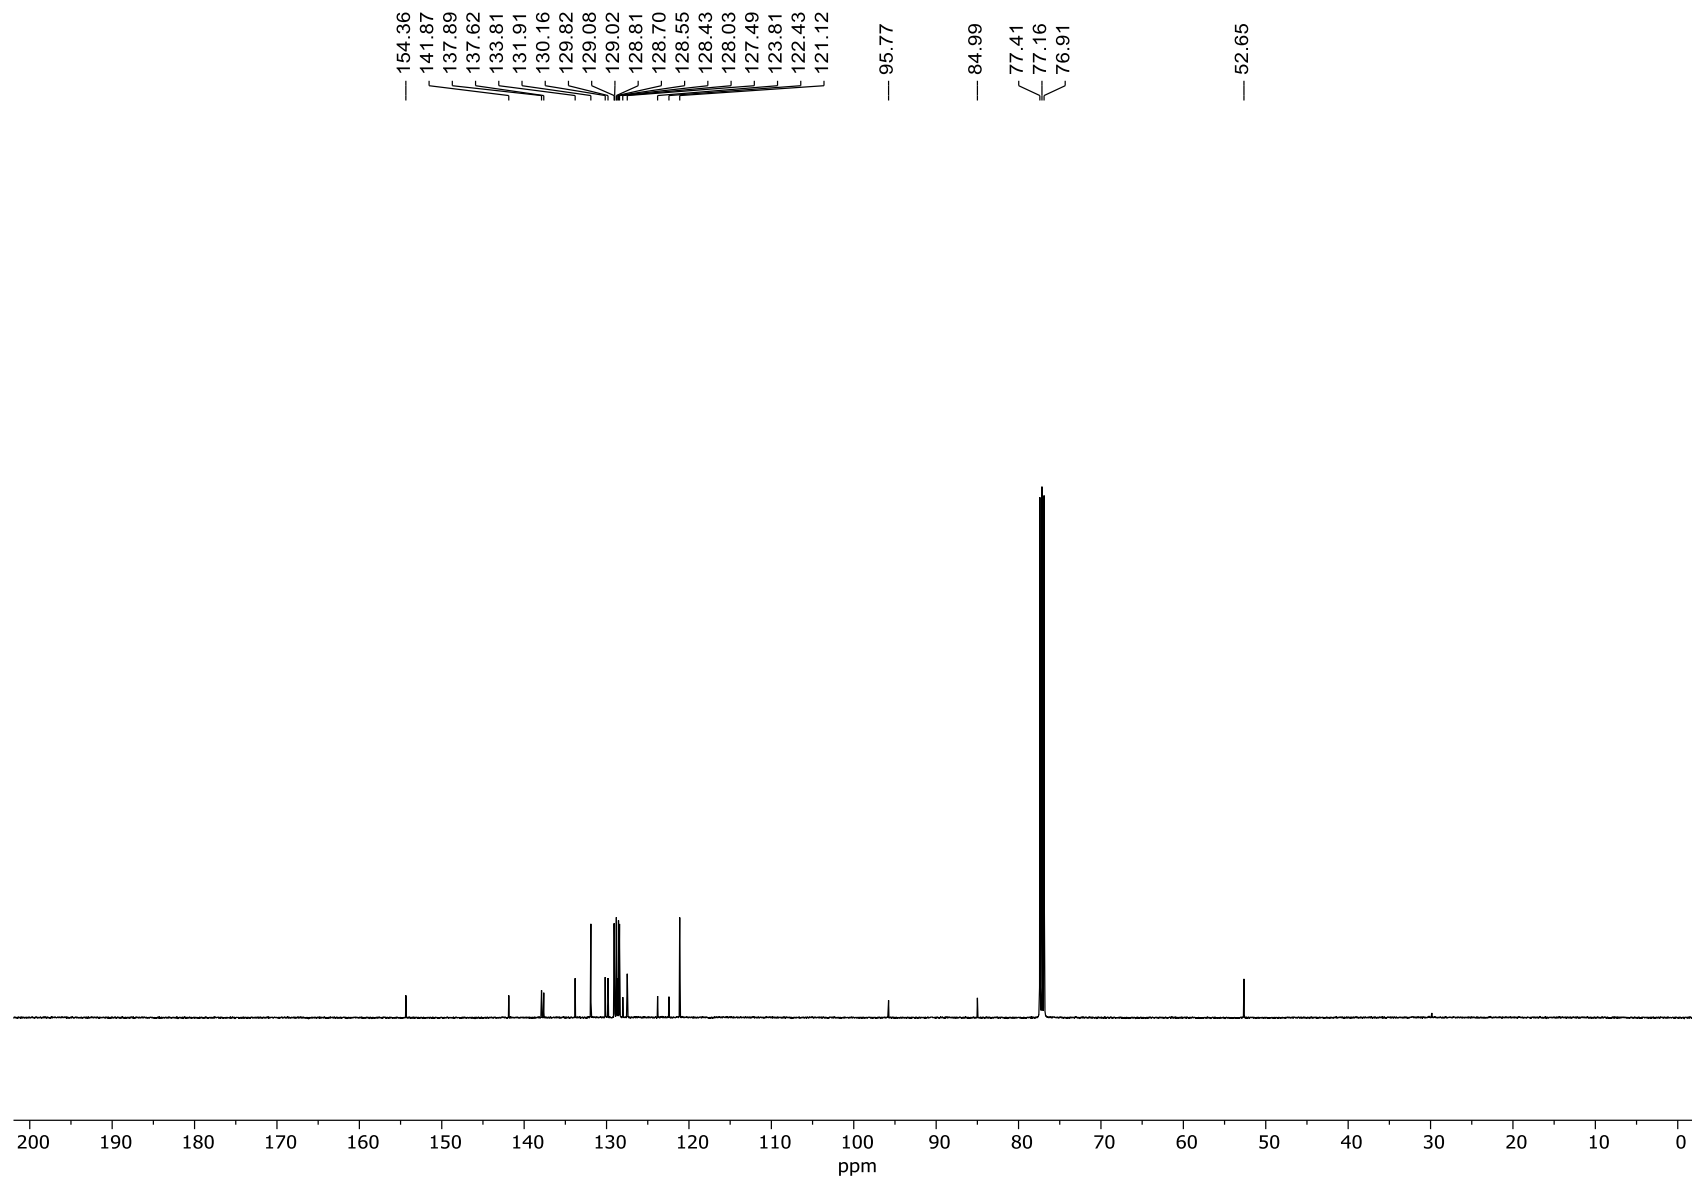



Figure S108:  $^1\text{H}$  NMR (500 MHz,  $\text{CDCl}_3$ , 298 K) spectrum of **6e**.

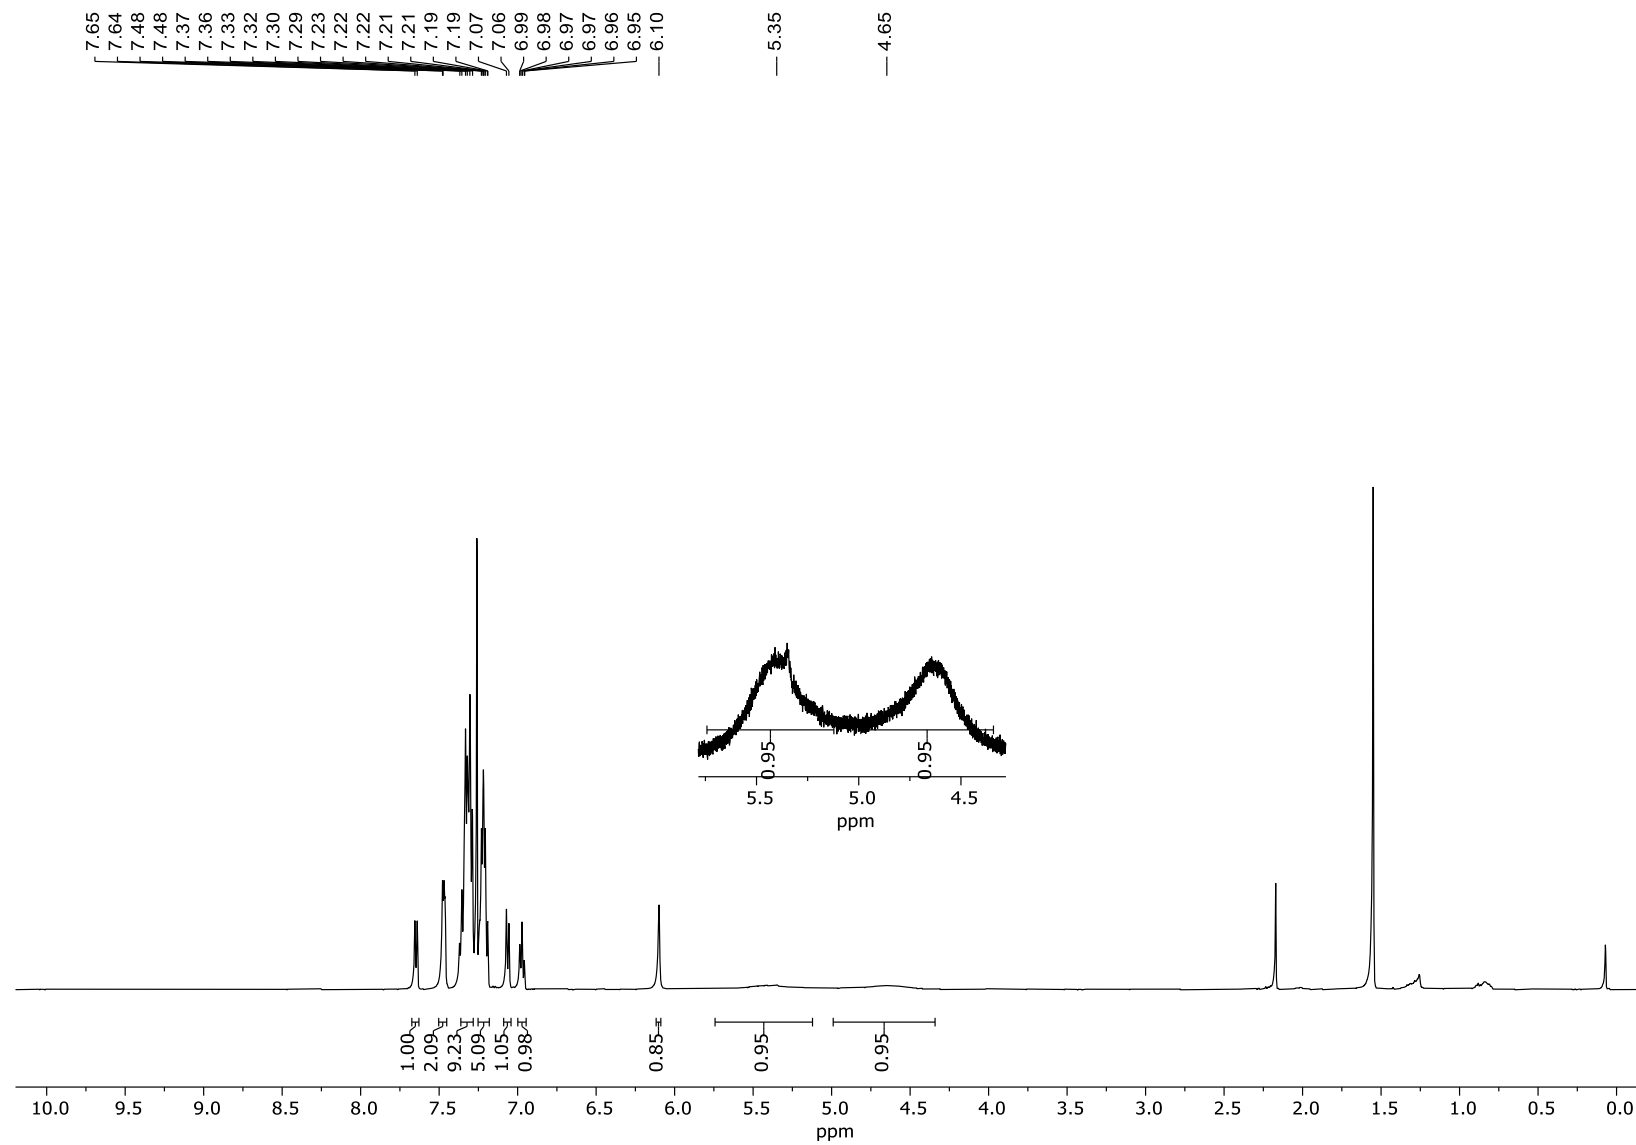

Figure S109:  $^{13}\text{C}$  NMR (126 MHz,  $\text{CDCl}_3$ , 298 K) spectrum of **6e**.

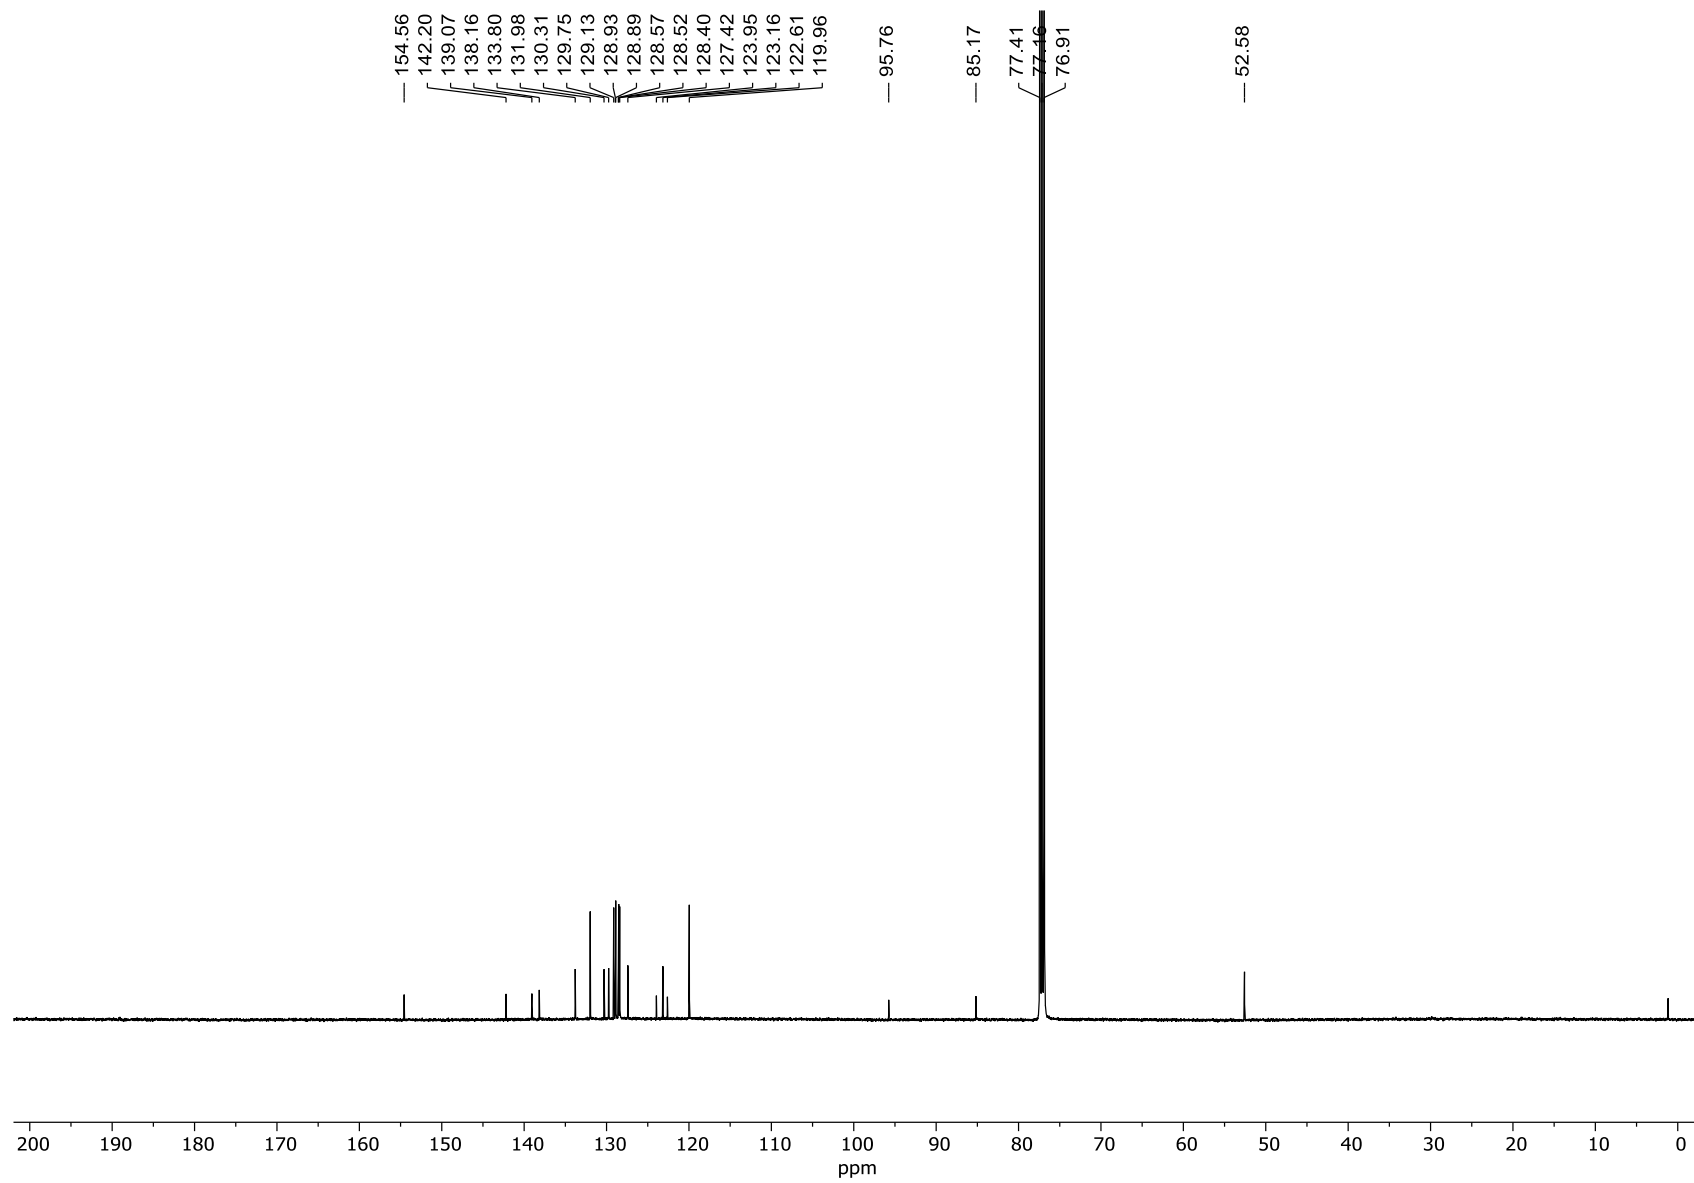

Figure S110:  $^1\text{H}$  NMR (500 MHz,  $\text{CDCl}_3$ , 298 K) spectrum of **6f**.

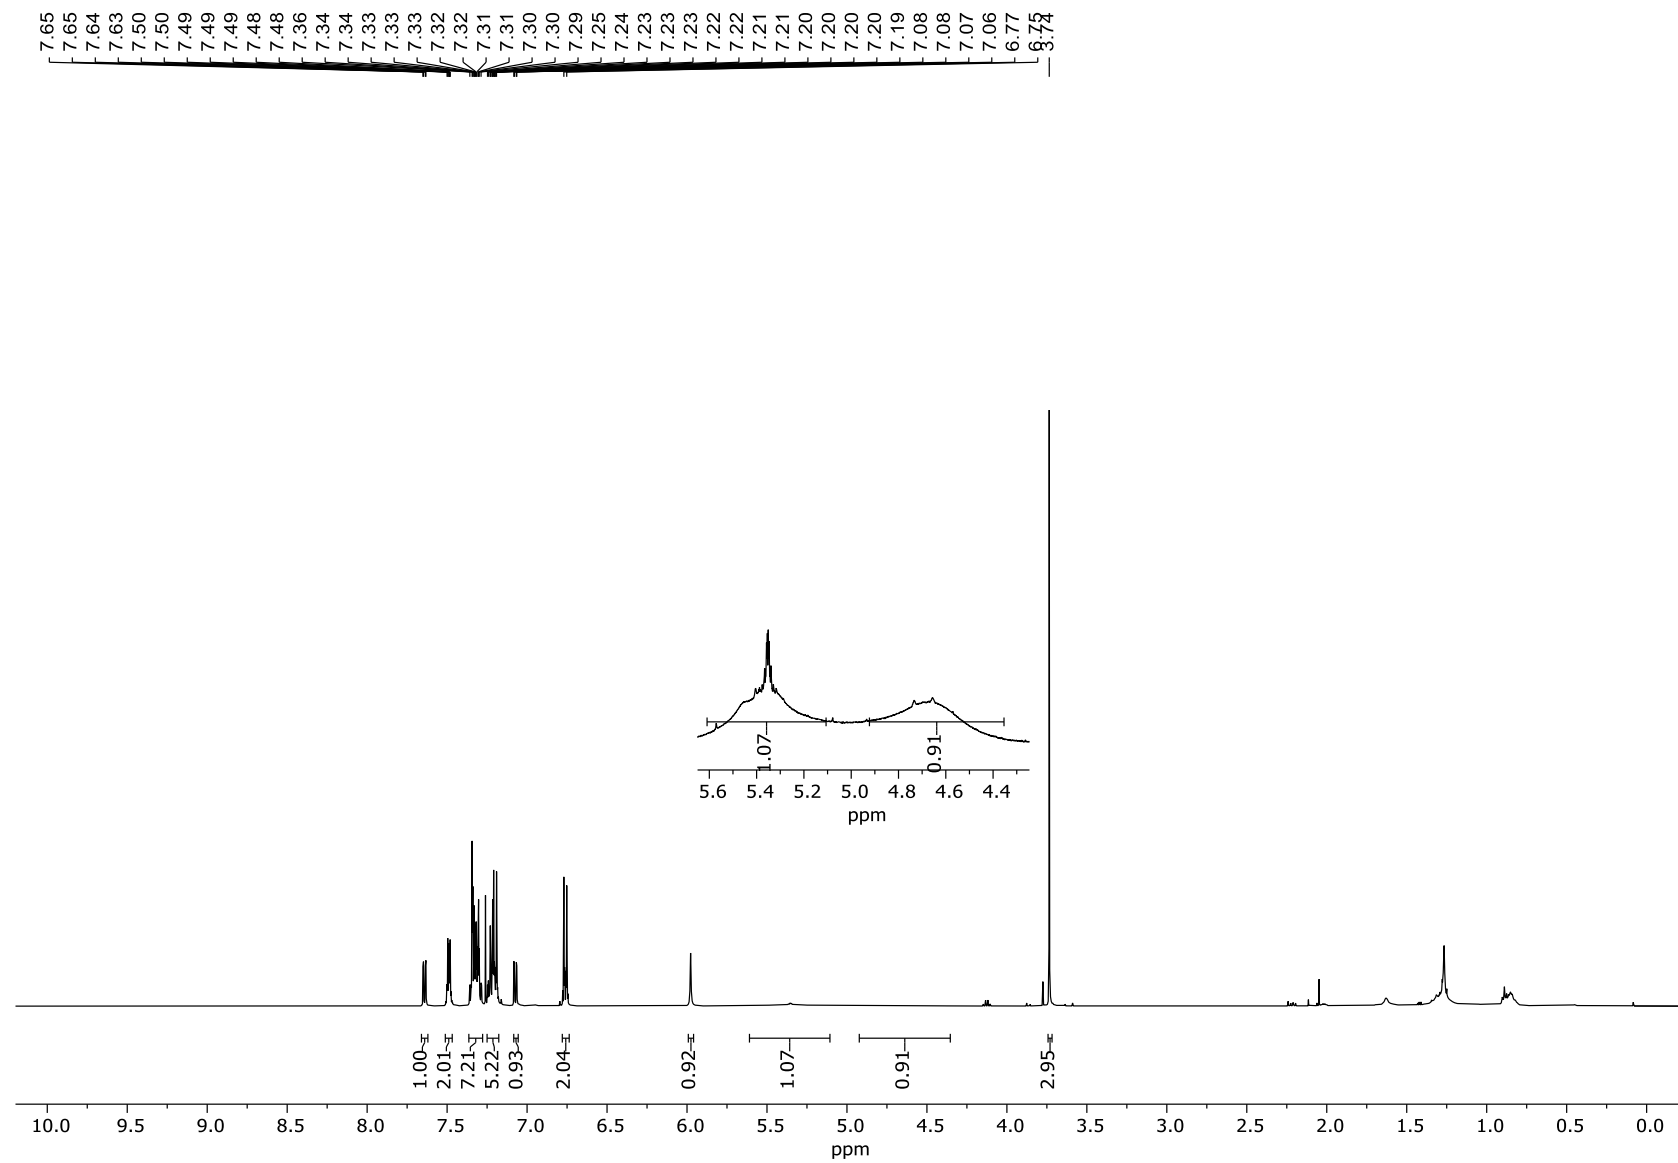

Figure S111:  $^{13}\text{C}$  NMR (126 MHz,  $\text{CDCl}_3$ , 298 K) spectrum of **6f**.

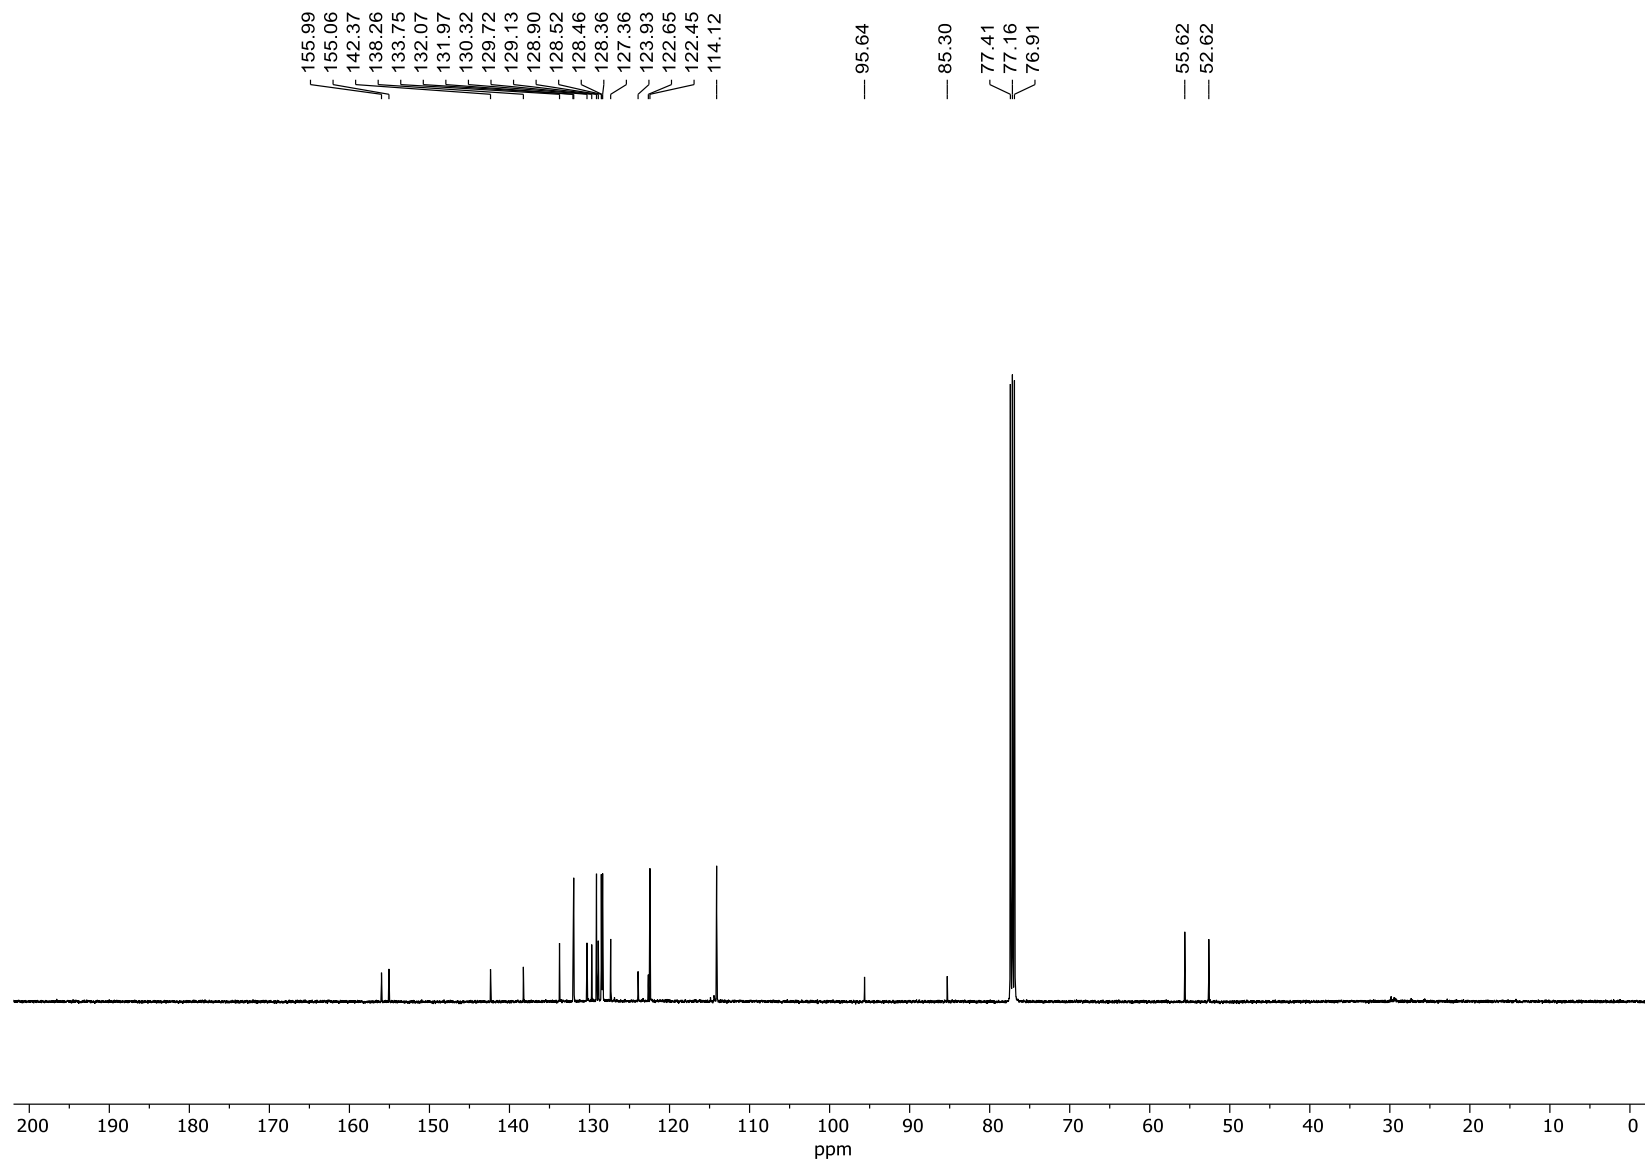

Figure S112:  $^1\text{H}$  NMR (500 MHz,  $\text{CDCl}_3$ , 298 K) spectrum of **6g**.

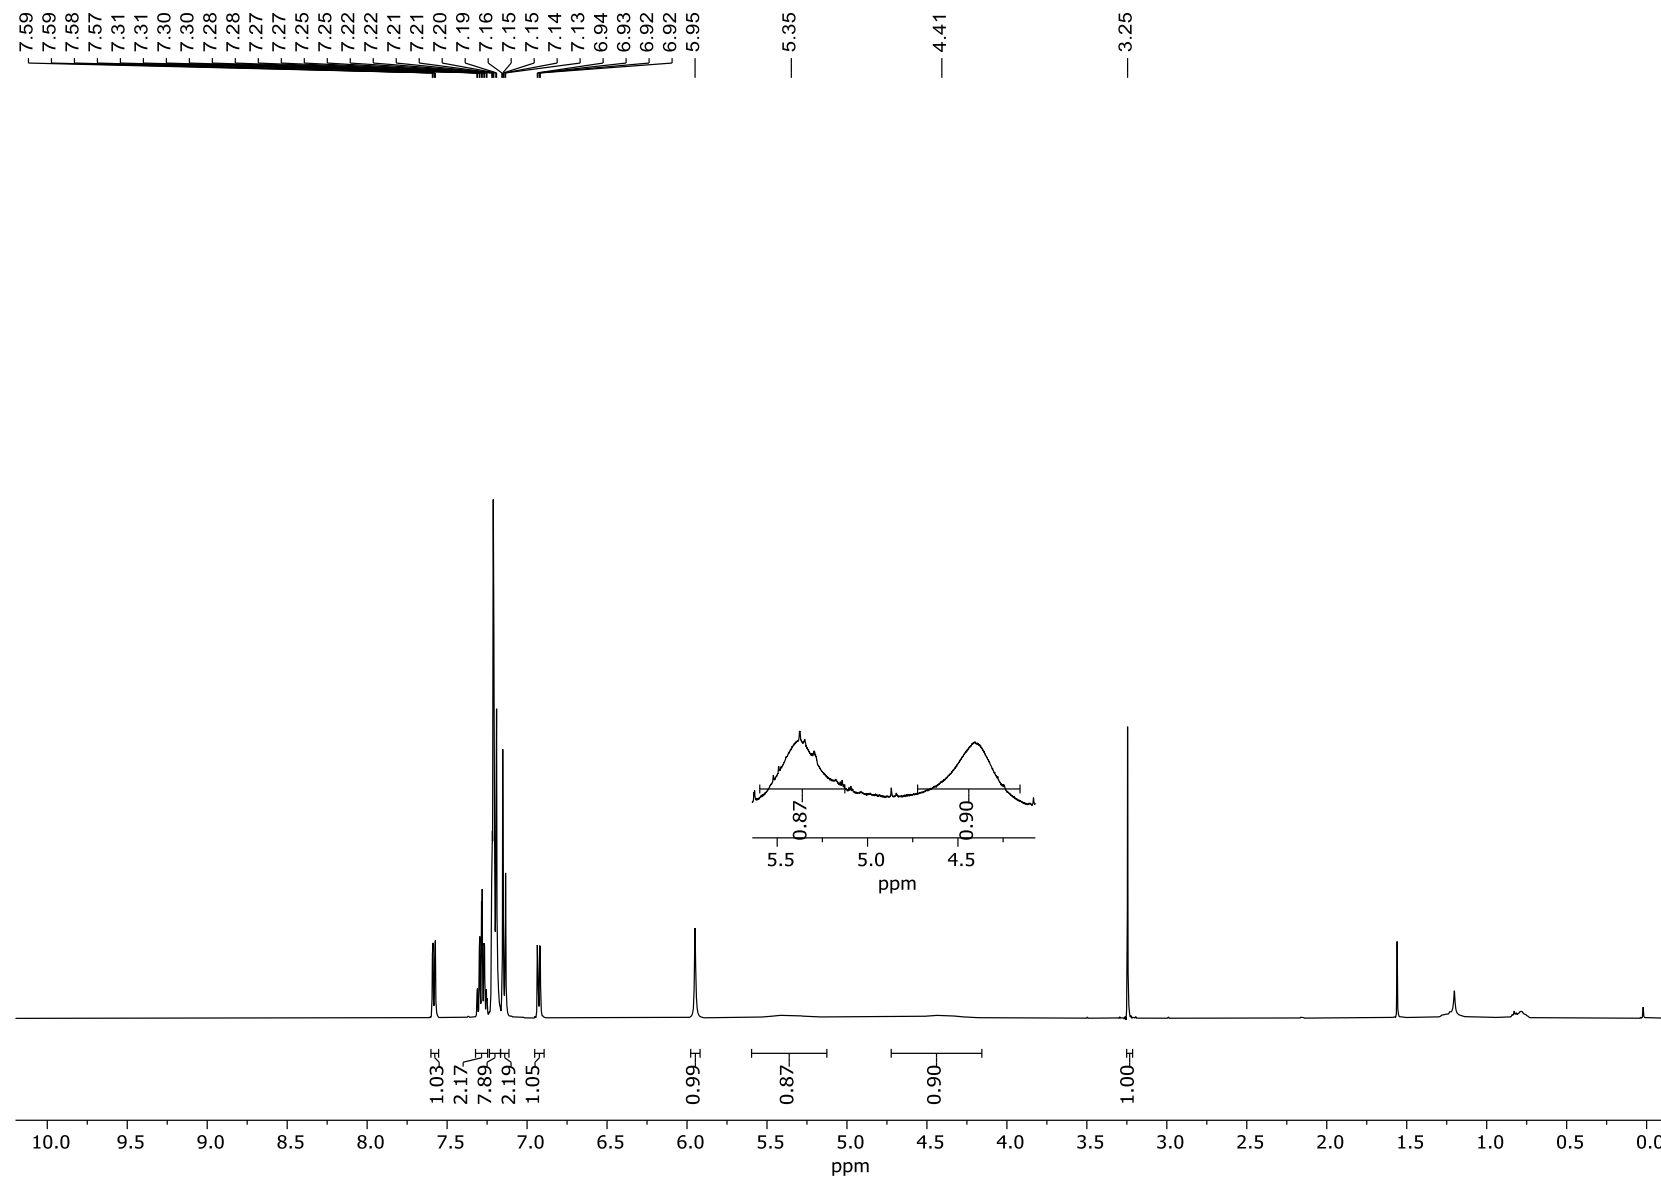

Figure S113:  $^{13}\text{C}$  NMR (126 MHz,  $\text{CDCl}_3$ , 298 K) spectrum of **6g**.

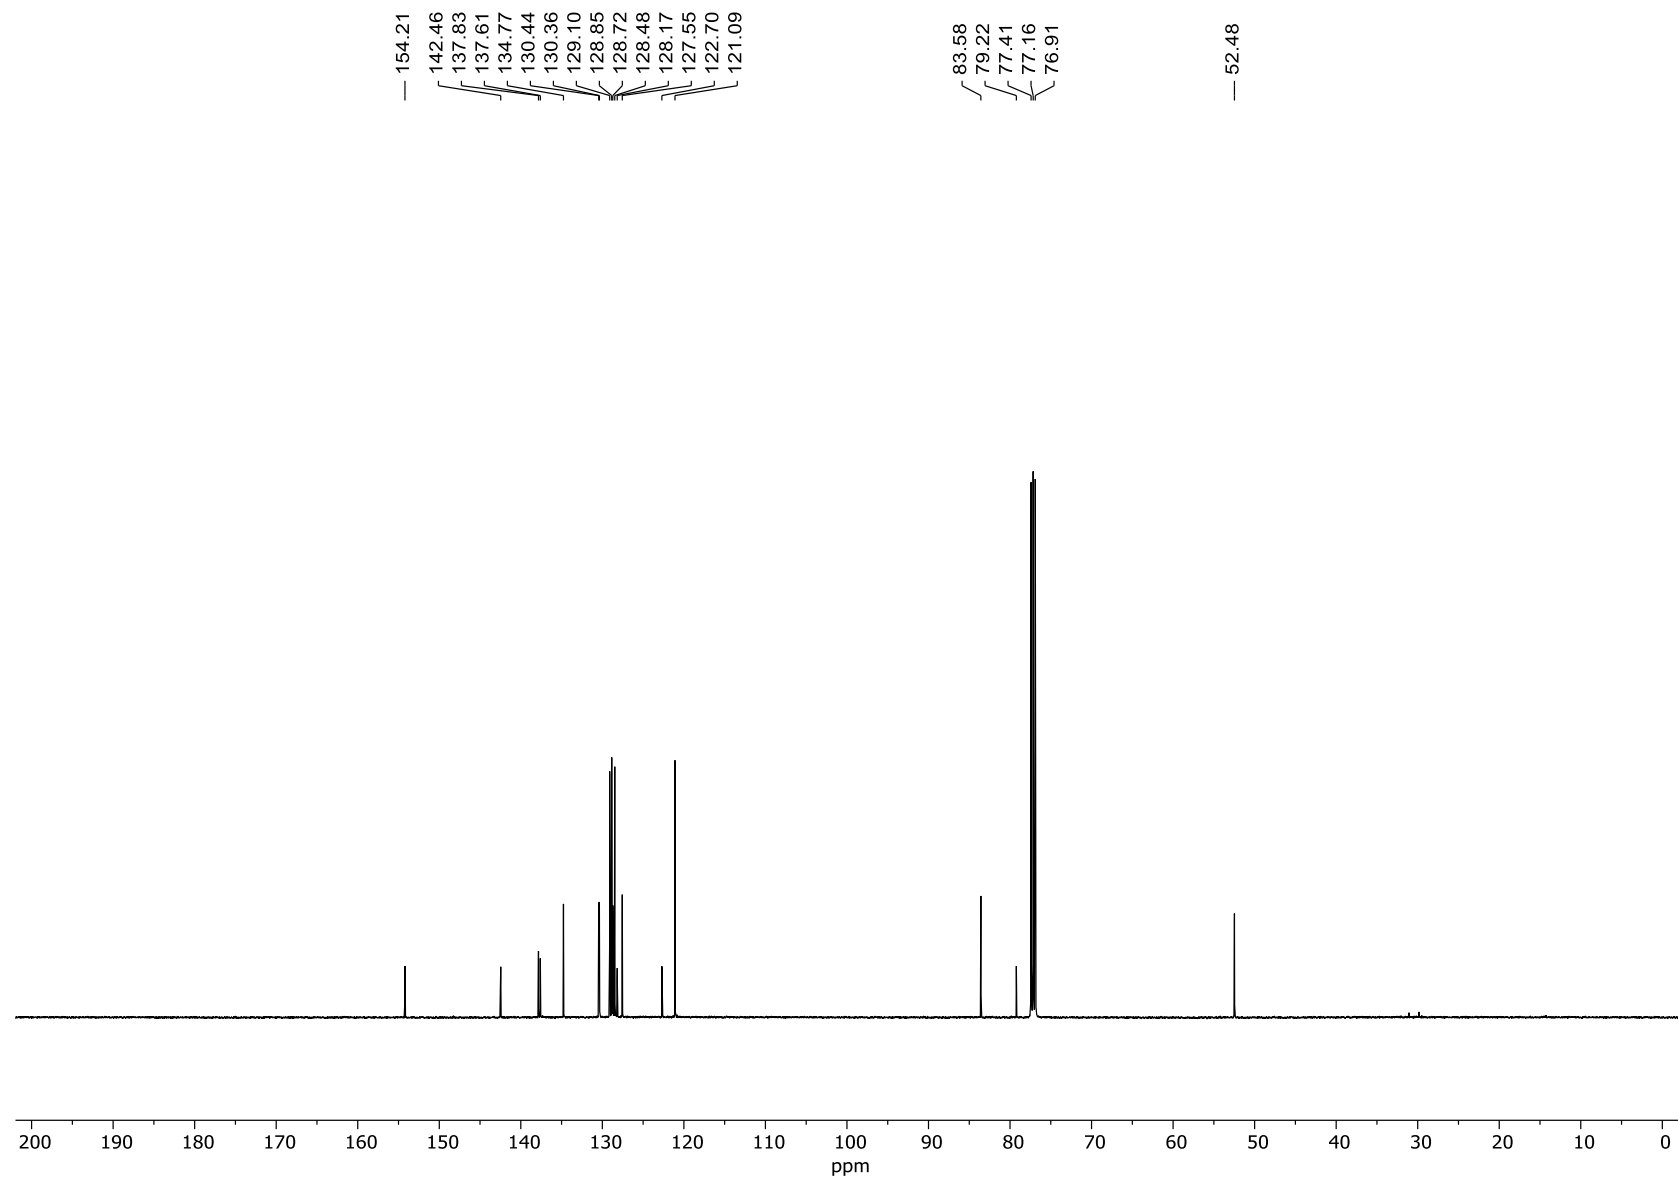

Figure S114:  $^1\text{H}$  NMR (500 MHz,  $\text{CDCl}_3$ , 298 K) spectrum of **6h**.

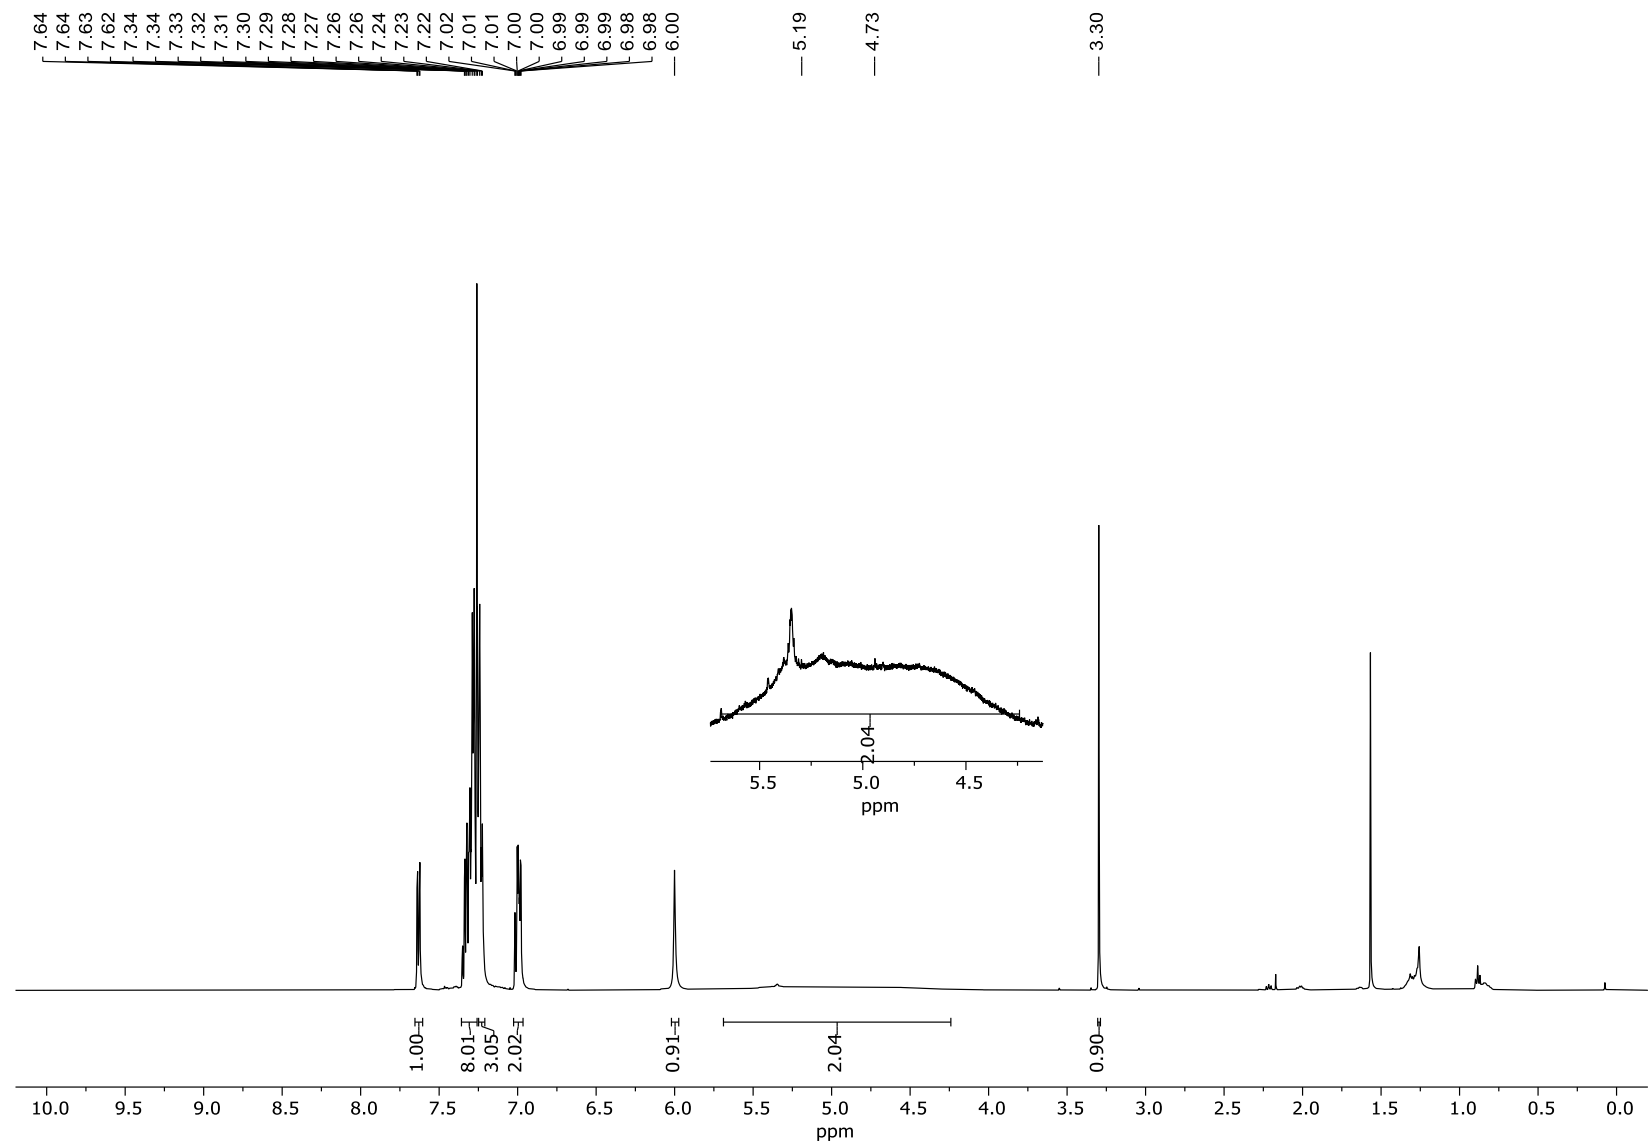

Figure S115:  $^{13}\text{C}$  NMR (126 MHz,  $\text{CDCl}_3$ , 298 K) spectrum of **6h**.

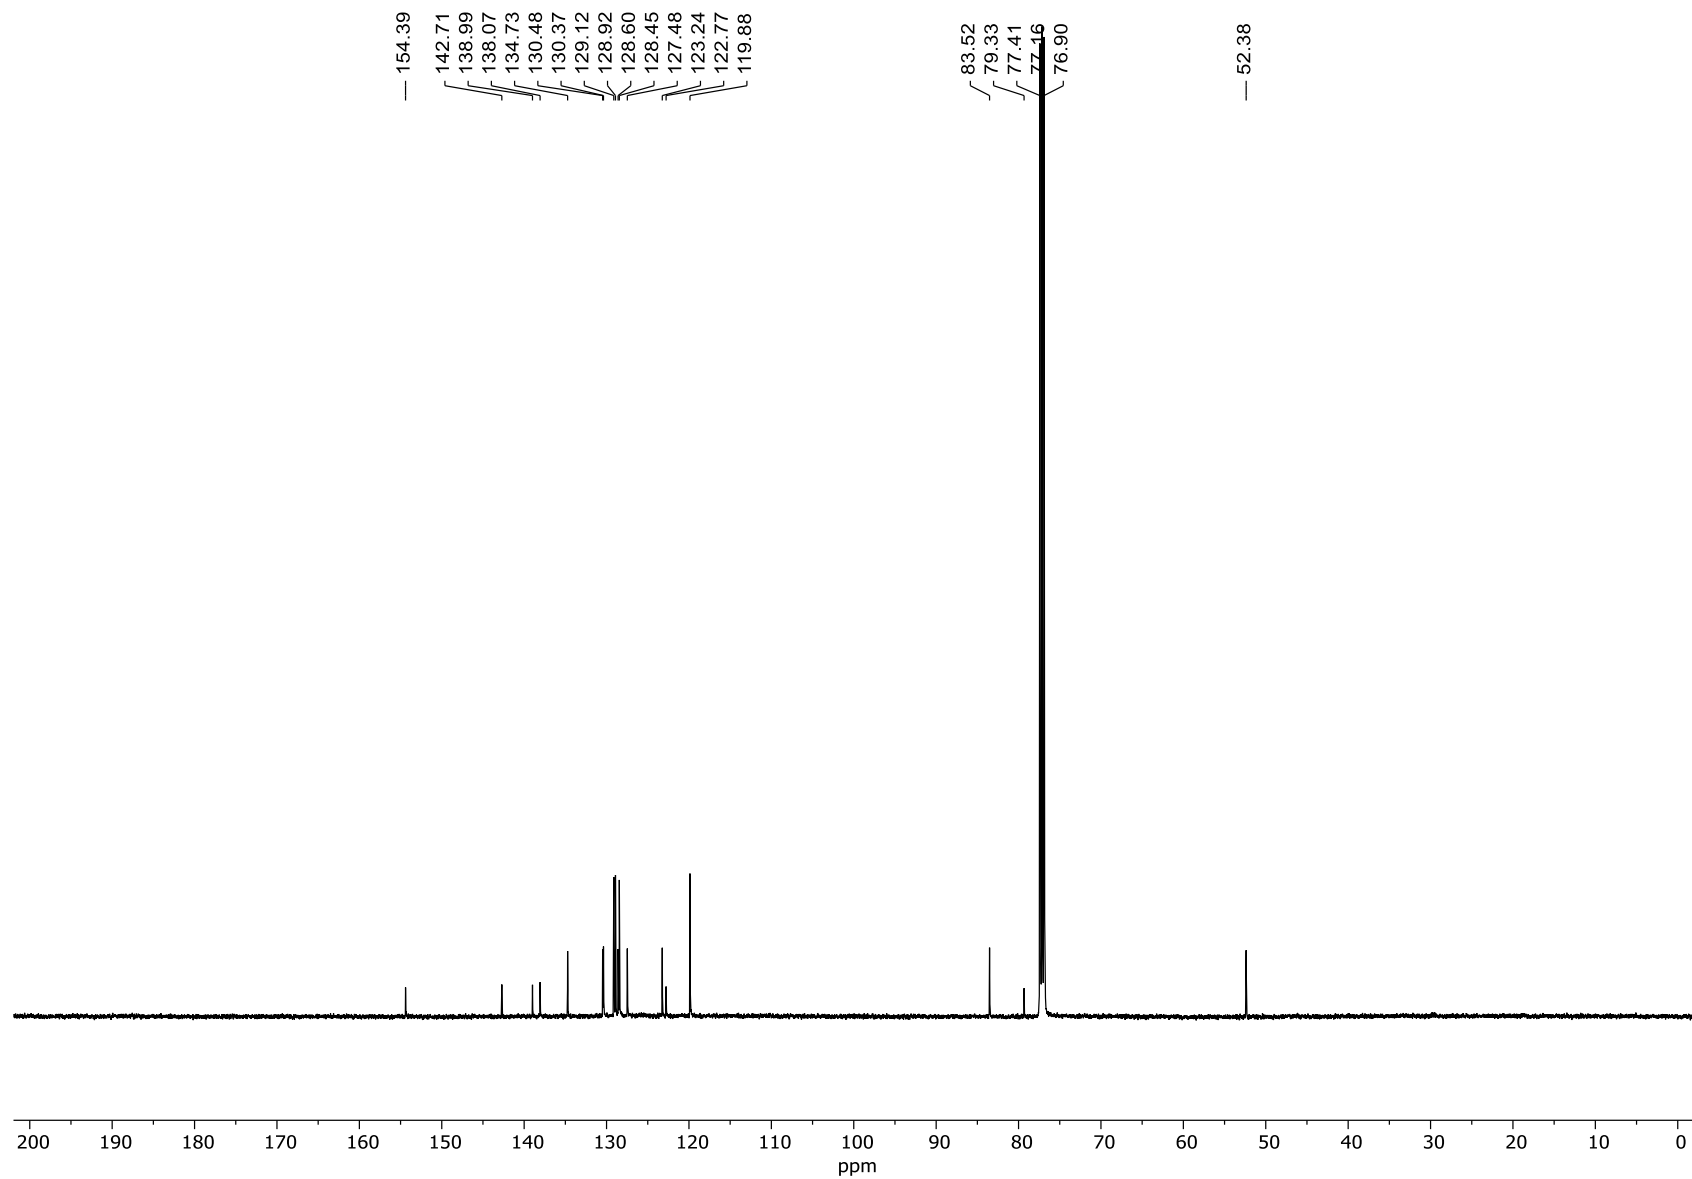



Figure S116:  $^1\text{H}$  NMR (500 MHz,  $\text{CDCl}_3$ , 298 K) spectrum of **6i**.

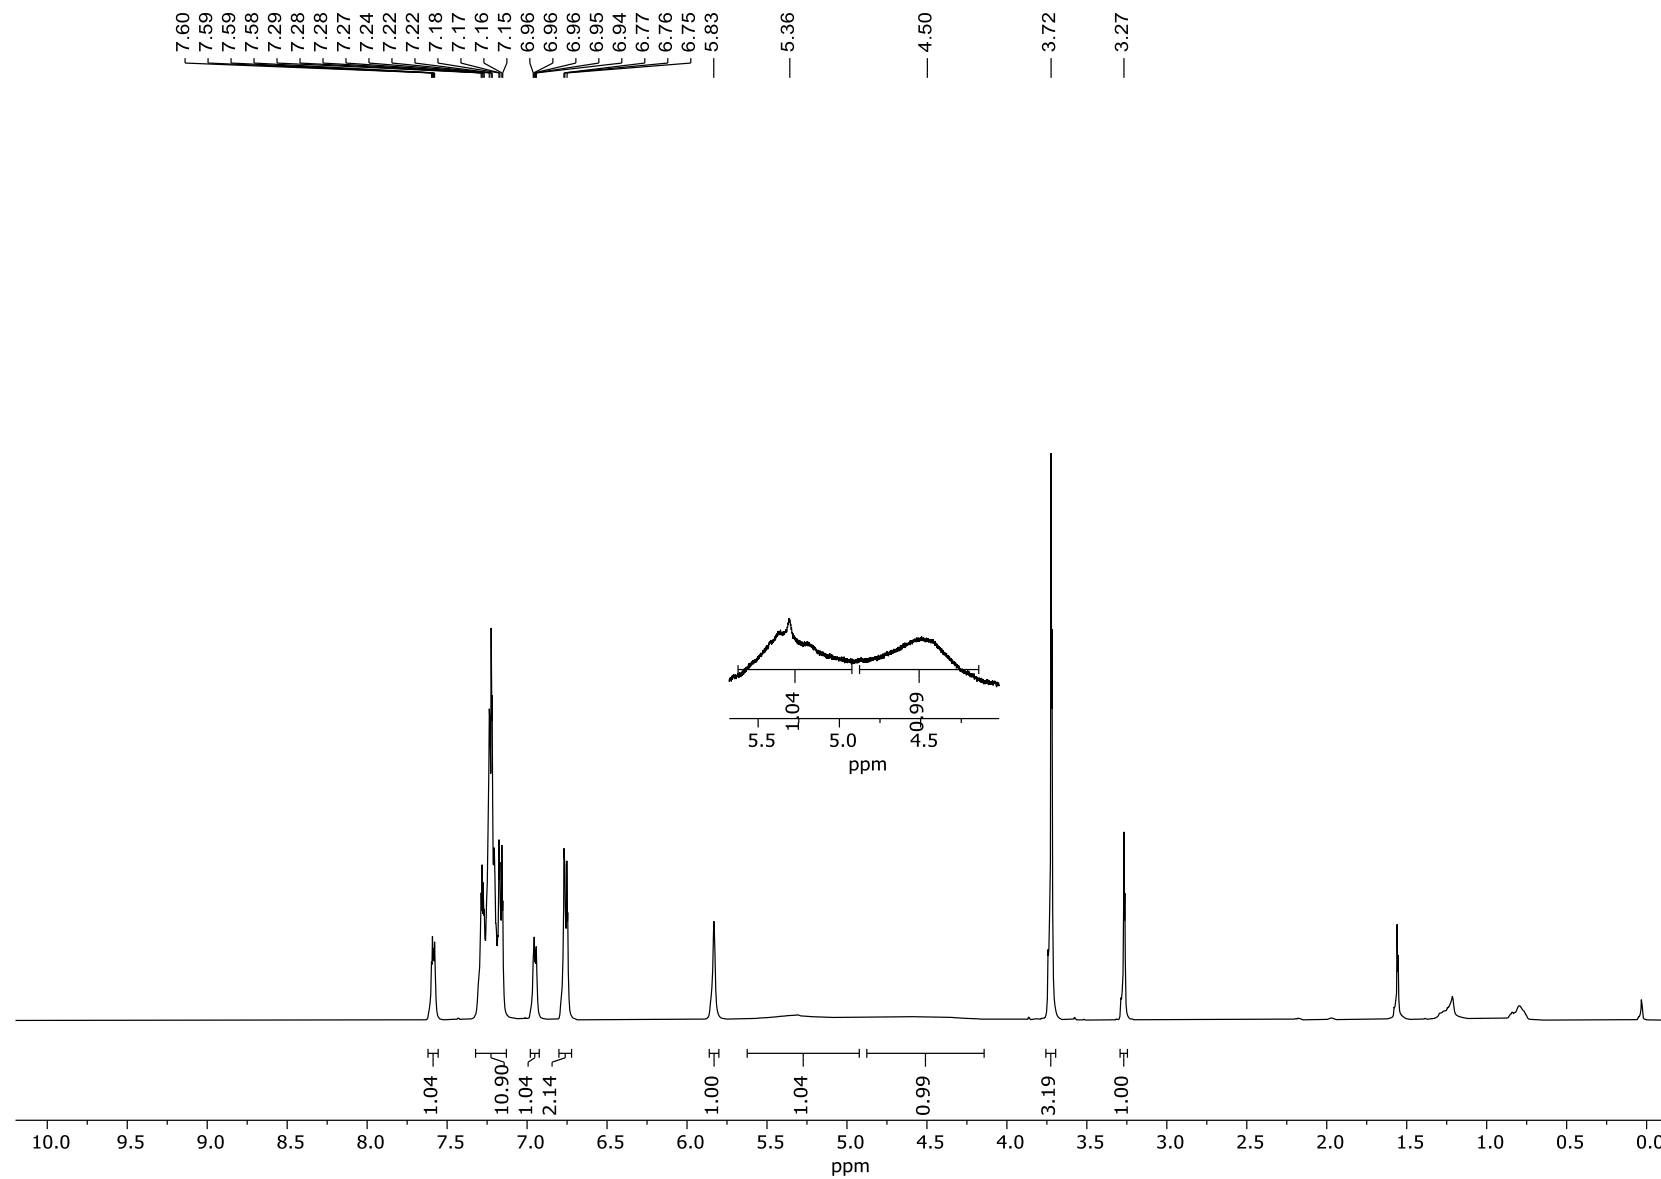

Figure S117:  $^{13}\text{C}$  NMR (126 MHz,  $\text{CDCl}_3$ , 298 K) spectrum of **6i**.

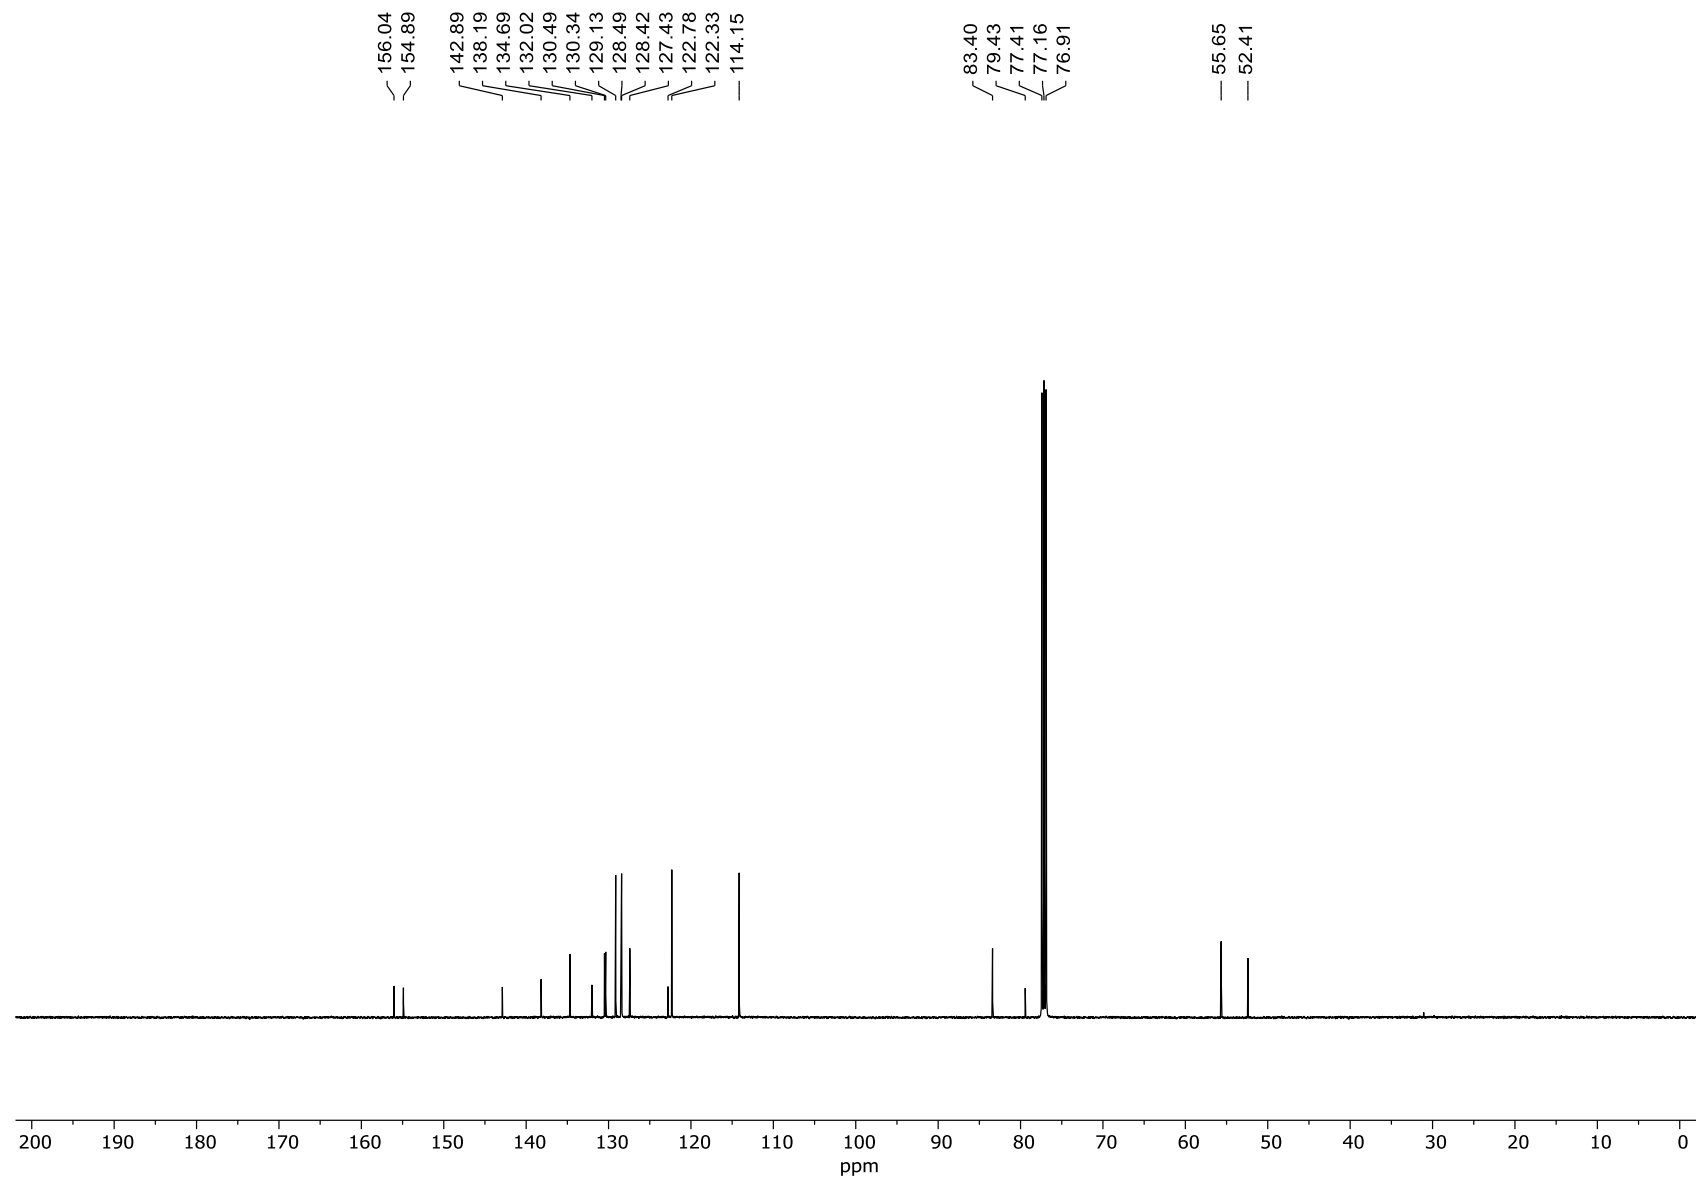

Figure S118:  $^1\text{H}$  NMR (400 MHz,  $\text{CD}_2\text{Cl}_2$ , 298 K) spectrum of  $\mathbf{10}\cdot\text{BCl}_3$ .

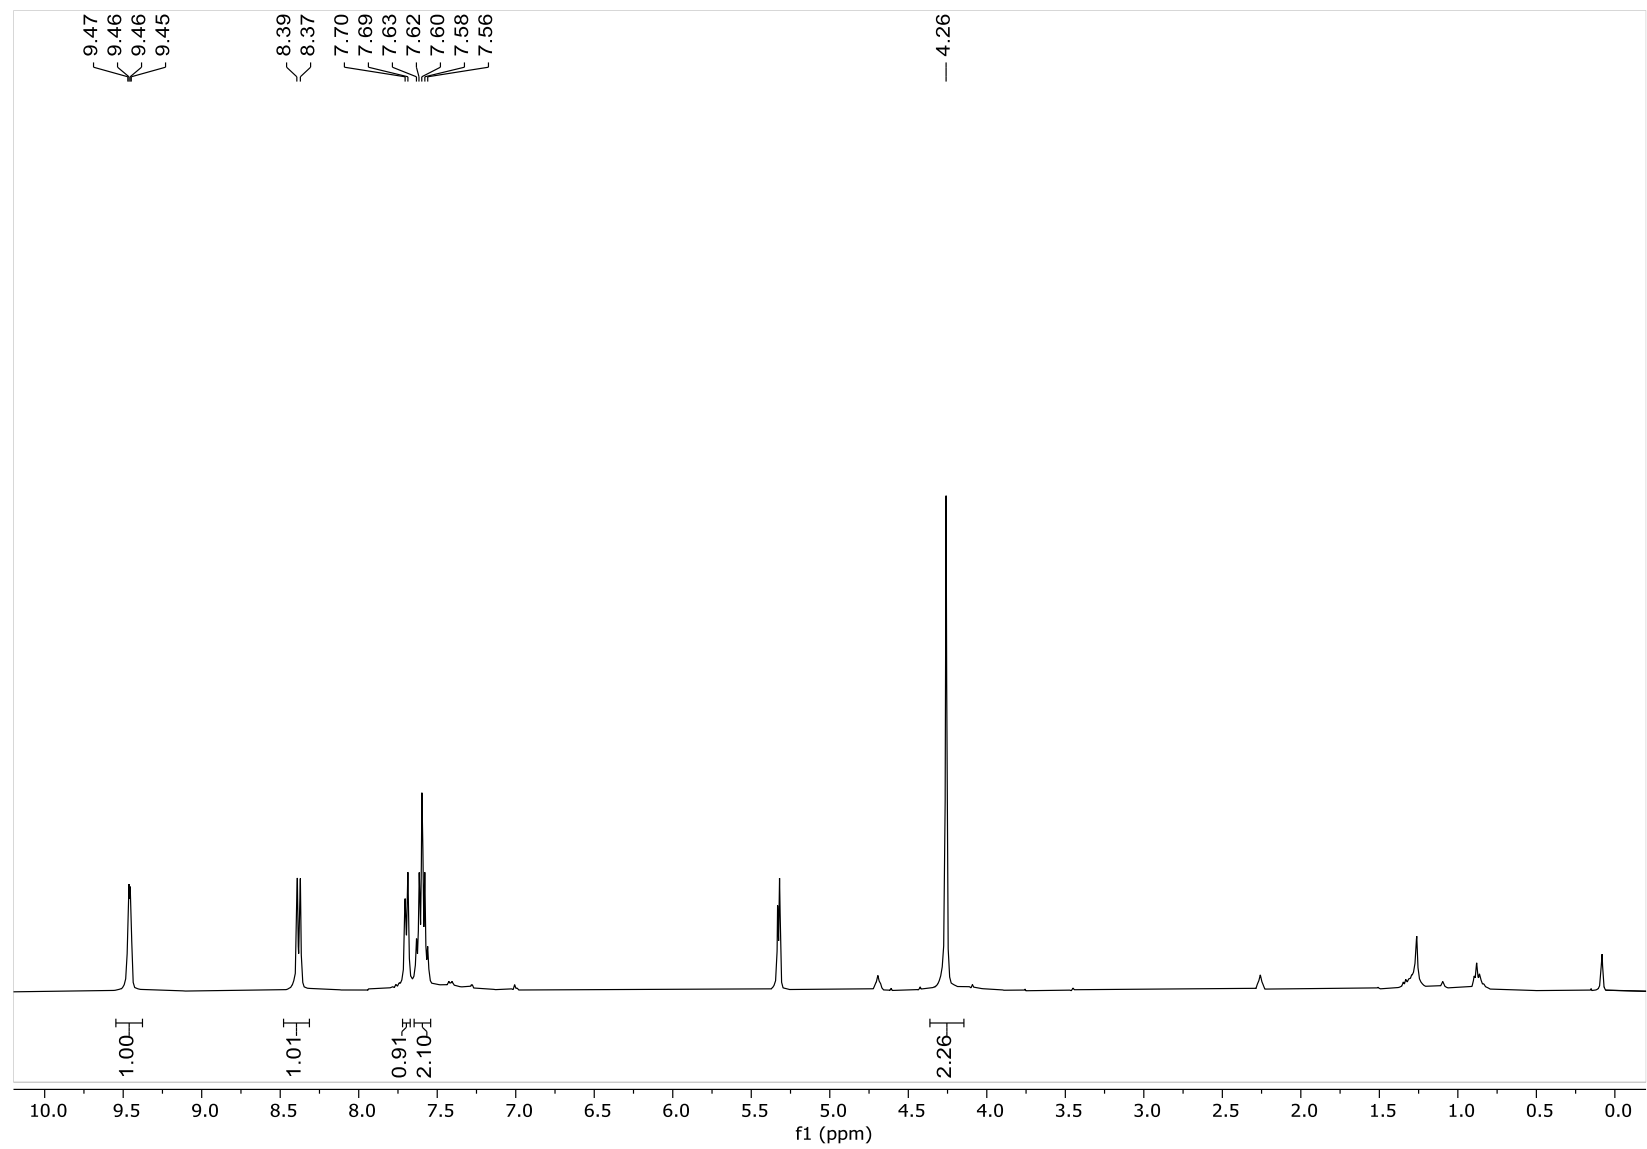

Figure S119:  $^{13}\text{C}$  NMR (101 MHz,  $\text{CD}_2\text{Cl}_2$ , 298 K) spectrum of  $\mathbf{10}\cdot\text{BCl}_3$ .

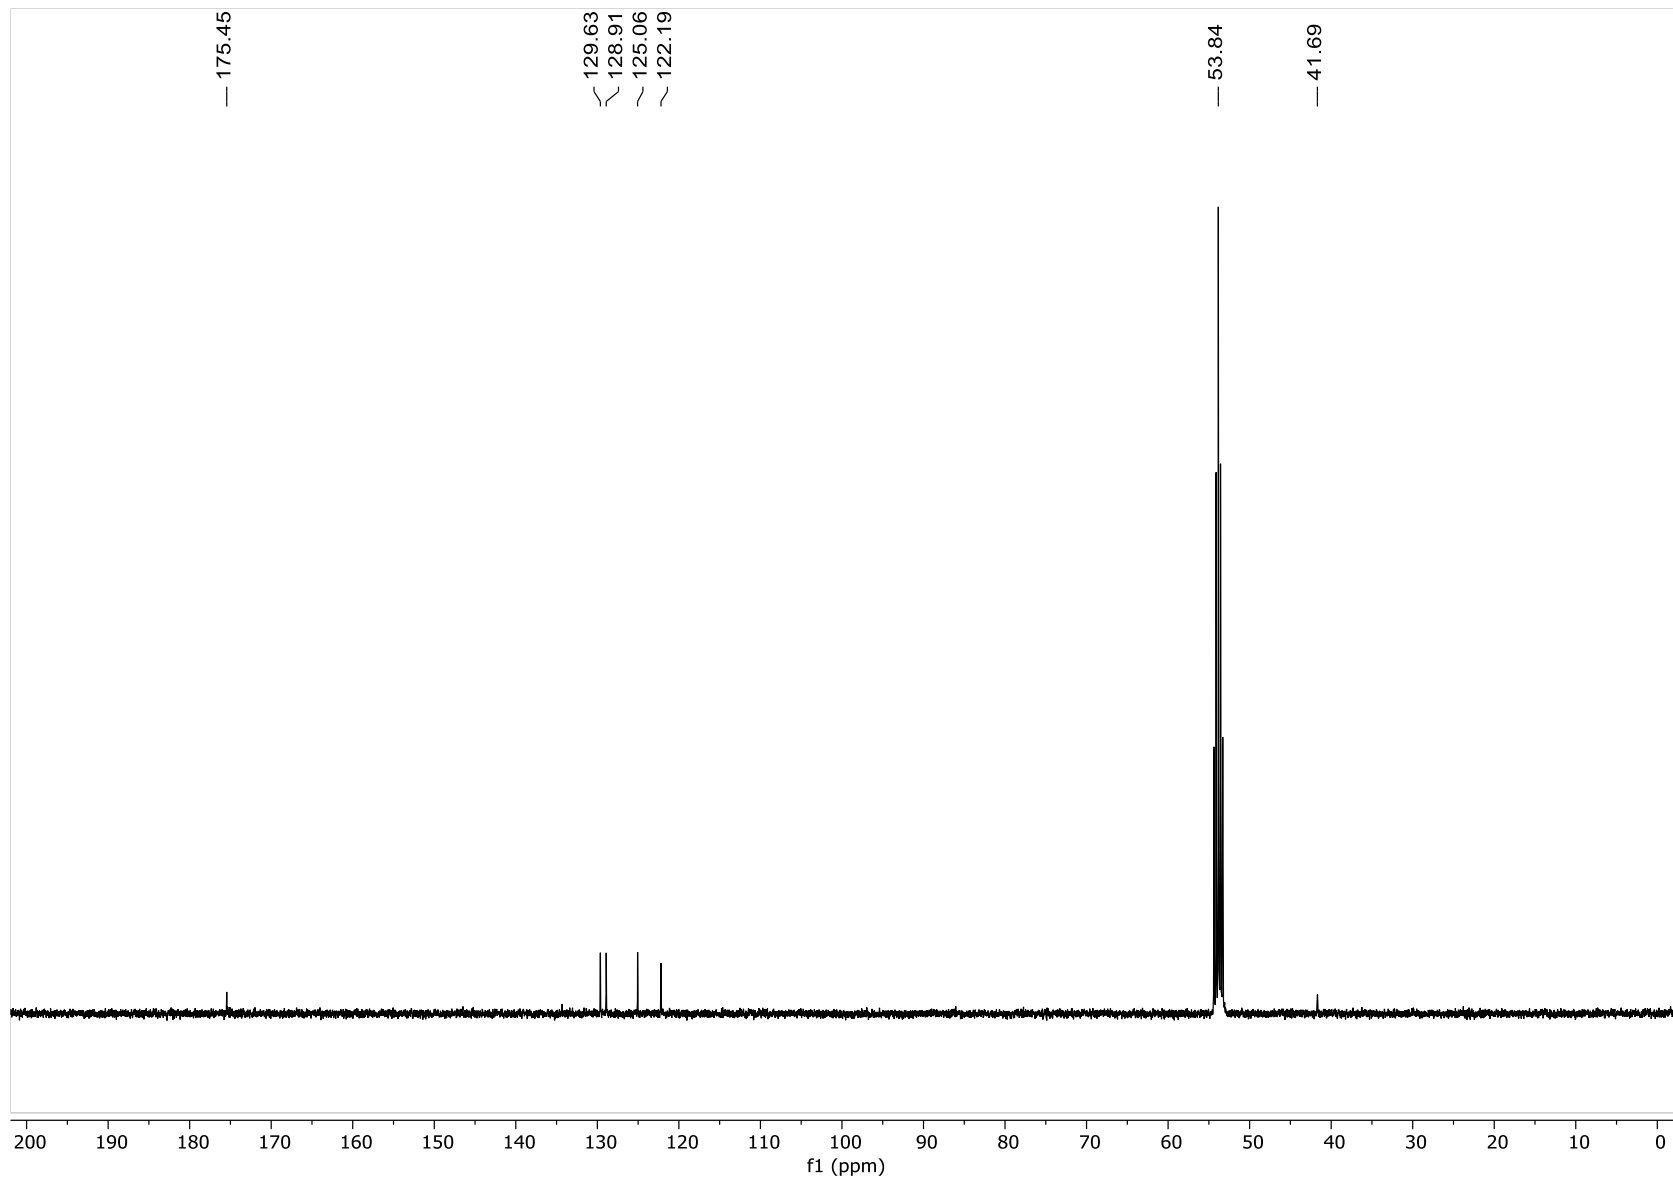

Figure S120:  $^{11}\text{B}$  NMR (128 MHz,  $\text{CD}_2\text{Cl}_2$ , 298 K) spectrum of  $10\cdot\text{BCl}_3$ .

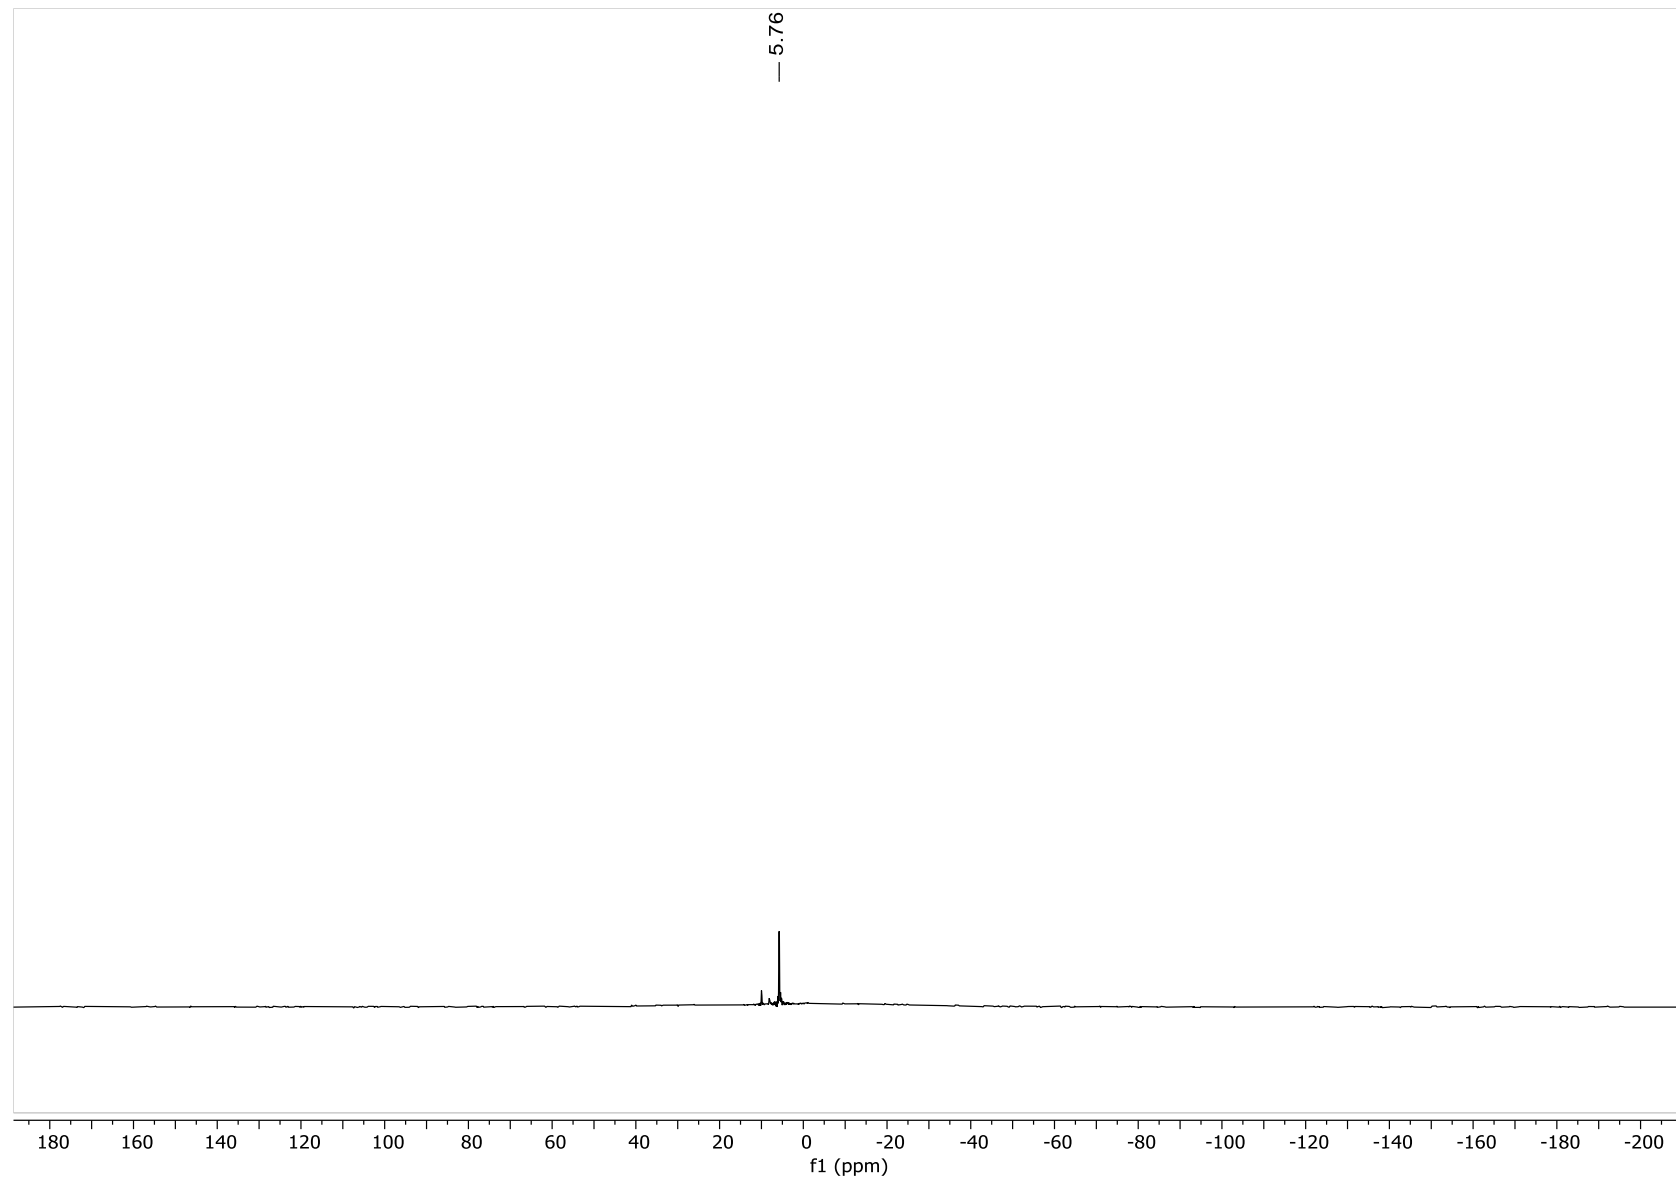

Figure S121:  $^1\text{H}$  NMR (500 MHz,  $\text{CDCl}_3$ , 298 K) of the reaction to afford **5a** using 0.05 equiv of **10**· $\text{BCl}_3$  (0.1 mmol toluene used as internal standard).

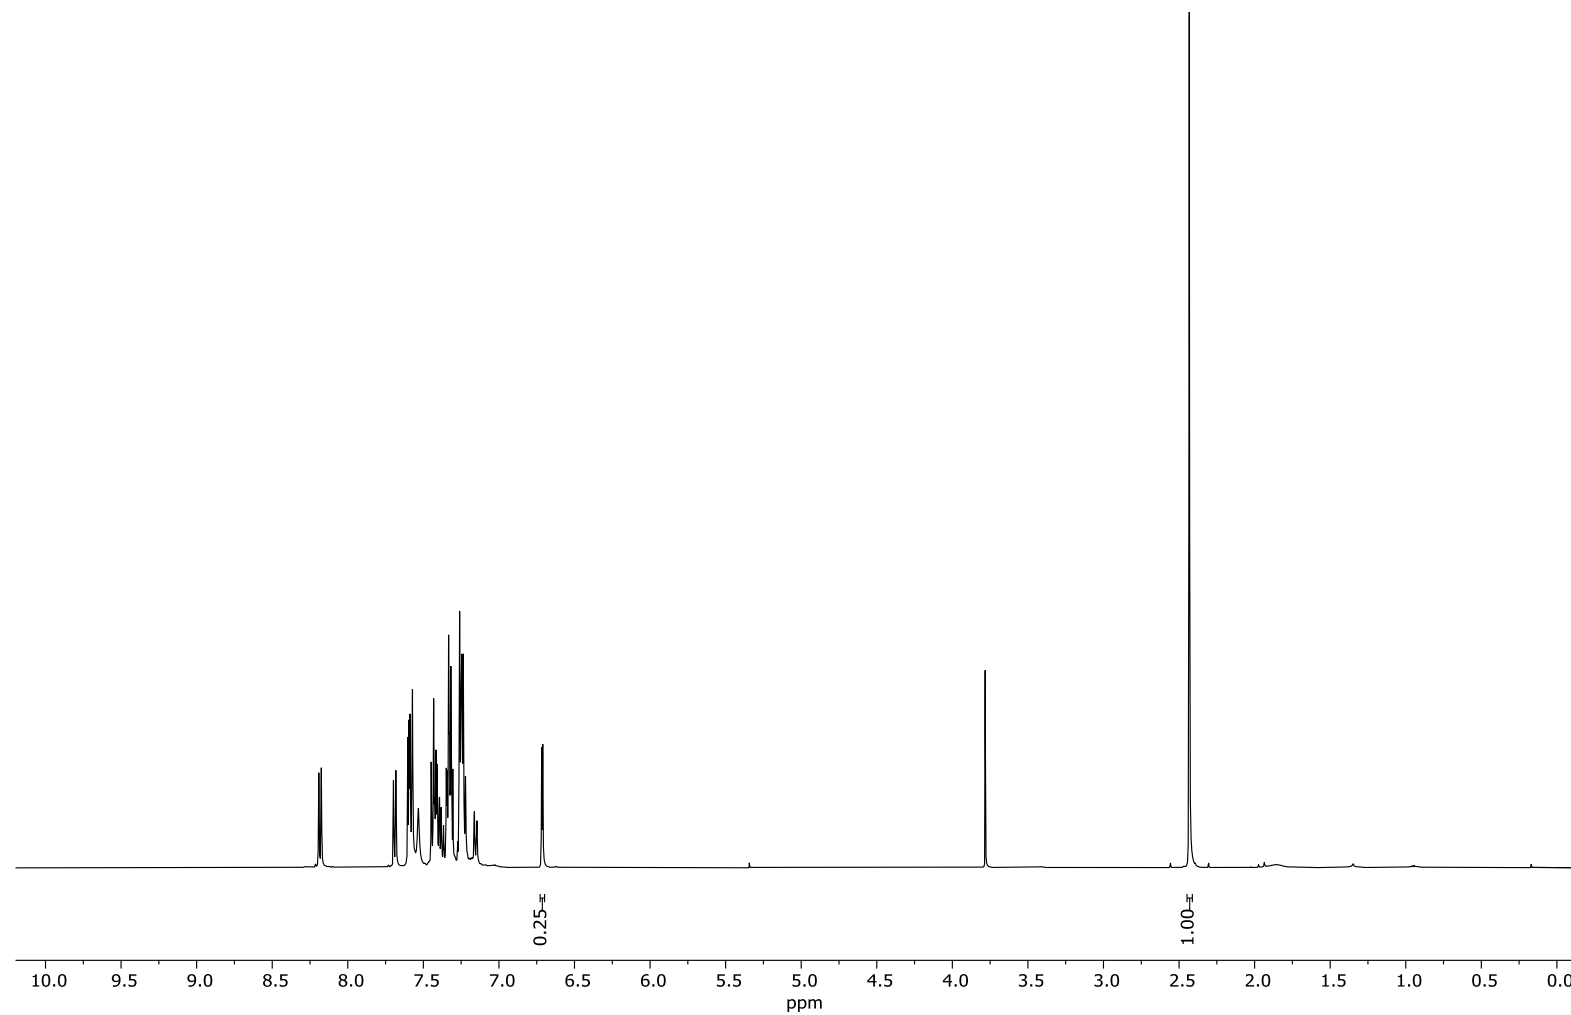

Figure S122: Stacked  $^1\text{H}$  NMR (500 MHz,  $\text{CDCl}_3$ , 298 K) of the crude reaction mixture (top) and **5a** (bottom).

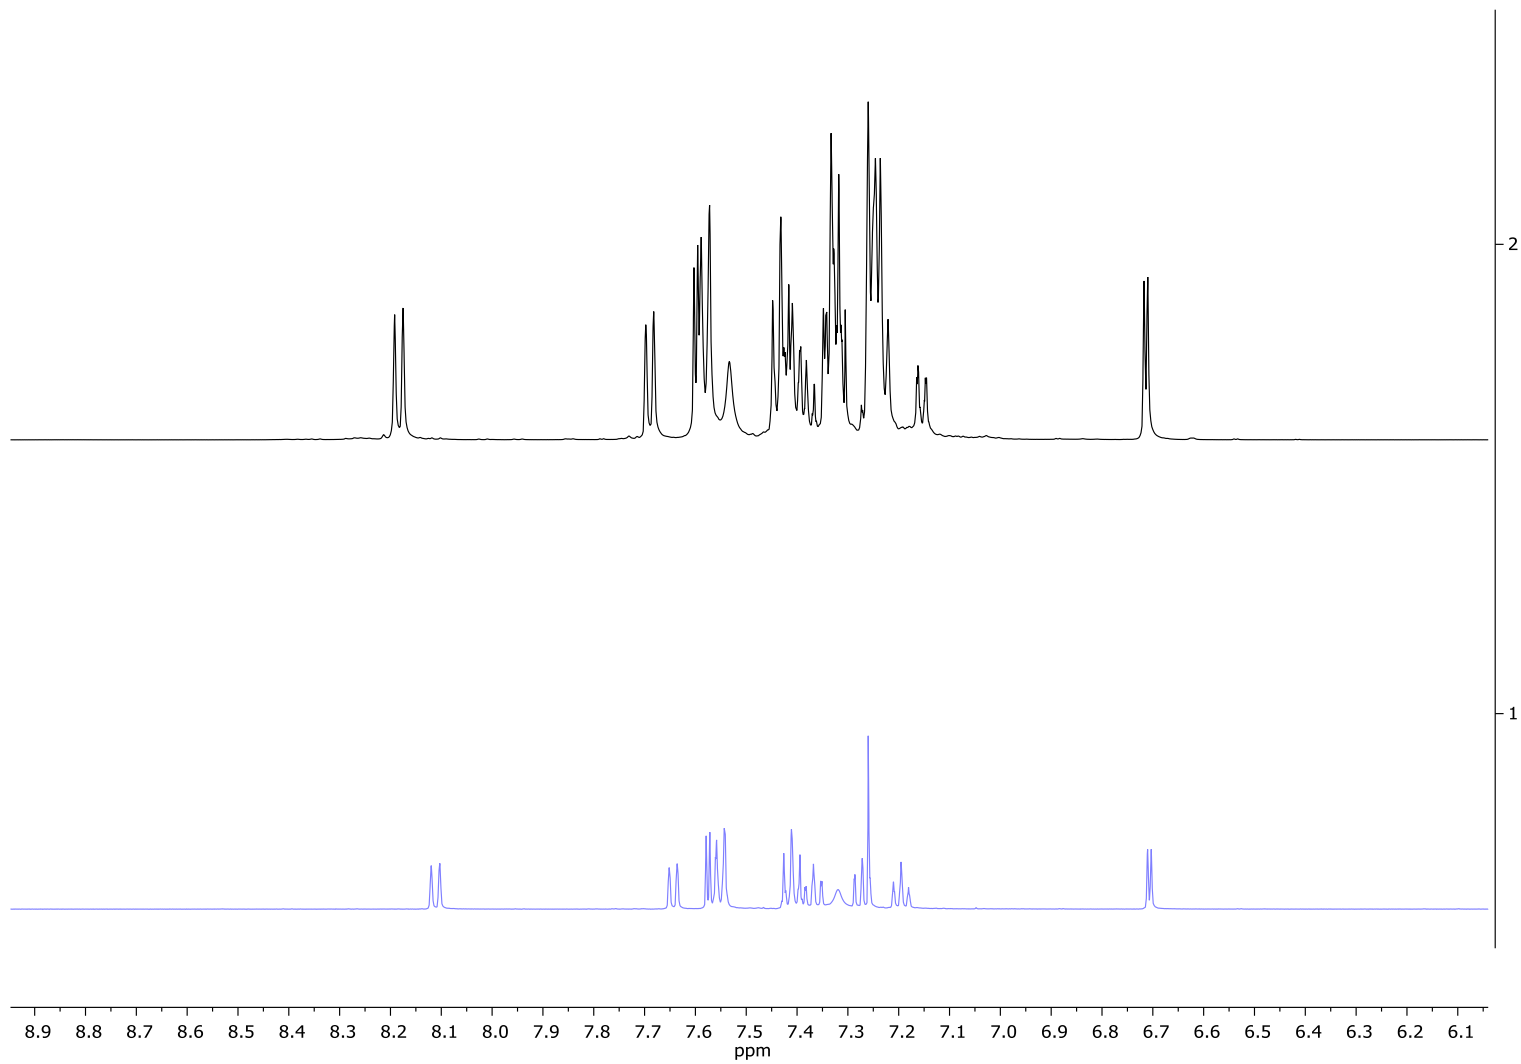

f

## 4. Crystallographic data

### 4.1 Single crystal X-ray diffraction experimental

Single crystals of **1b**, **2**, **3**, **4**, **5a**, **5i**, **5t**, and **6a** were grown in a fume hood by slow evaporation or vapor diffusion, **1a**·**B(C<sub>6</sub>F<sub>5</sub>)<sub>3</sub>**, **1b**·**B(C<sub>6</sub>F<sub>5</sub>)<sub>3</sub>** and **10**·**BCl<sub>3</sub>** were grown in a glovebox under a nitrogen atmosphere by slow evaporation at room temperature (23 °C). Crystallographic studies were undertaken on a single crystal mounted in Fomblin<sup>®</sup>Y and studied on an Agilent SuperNova Dual Atlas three-circle diffractometer using Mo- or Cu-K $\alpha$  radiation and a CCD detector. Measurements were taken at 298(1) K for **1b**, **4**, **5i** and **5t**; 200(1) K for **2** and **6a**; 180(1) K for **1a**·**B(C<sub>6</sub>F<sub>5</sub>)<sub>3</sub>**, **1b**·**B(C<sub>6</sub>F<sub>5</sub>)<sub>3</sub>**, **3**, **5a** and **10**·**BCl<sub>3</sub>** with temperatures maintained using an Oxford cryostream. Data were collected, integrated and corrected for absorption within CrysAlisPro.<sup>14</sup> The absorption correction implemented a numerical absorption correction based on Gaussian integration over a multifaceted crystal model. The structure was solved by intrinsic phasing and refined against  $F^2$  within SHELXL-2013.<sup>15</sup> The structure has been deposited with the Cambridge Structural Database [CCDC deposition numbers 2125082 (**1b**), 2125086, (**1a**·**B(C<sub>6</sub>F<sub>5</sub>)<sub>3</sub>**), 2125087 (**1b**·**B(C<sub>6</sub>F<sub>5</sub>)<sub>3</sub>**), 2125085 (**2**), 2163367 (**3**), 2167662 (**4**), 2143129 (**5a**), 2125083 (**5i**), 2163369 (**5t**), 2163272 (**6a**), 2163368 (**10**·**BCl<sub>3</sub>**)]. This can be obtained free of charge from the Cambridge Crystallographic Data Centre via [www.ccdc.cam.ac.uk/data\\_request/cif](http://www.ccdc.cam.ac.uk/data_request/cif).

In the refinement of crystal **1b**, weak high angle data ( $> 50^\circ$ ) with negative intensities ( $I/s > 3$ ) were omitted in the latter stages of refinement (OMIT -3 50) while maintaining sufficient data to provide a data:parameter ratio of approximately 10:1.

The structure of **2** contained two CH<sub>2</sub>Cl<sub>2</sub> molecules in the asymmetric unit, one of which was found to be disordered and modelled over two positions. The relative sof's were initially refined using a common U<sub>iso</sub> for the Cl atoms and then the sof fixed with an occupancy of 46:54% and the U<sub>ij</sub> refined freely for the Cl atoms. To add H atoms the CH<sub>2</sub>Cl<sub>2</sub> unit was modelled over two sites with common fractional atomic coordinates (EXYZ) and U<sub>ij</sub> (EADP) for the two components of C atom disorder and the two components of Cl atom disorder modelled anisotropically with a common C–Cl bond distance (SADI). This reduced the residual electron density and improved the final R<sub>1</sub> and wR<sub>2</sub> values.

In the refinement of crystal **5a**, nine particularly disagreeable reflections with computed intensity errors  $F_o^2 - F_c^2 > 7s$  were omitted (OMIT) in latter stages of refinement as these were obscured by the beamstop. Residual electron density ( $>0.75 \text{ e } \text{\AA}^{-3}$ ) was located around C27–H27 during the refinement with H27 added at the calculated position (HFIX 43). Alternatively, this H atom was



located in the difmap and refined with a DFIX instruction (DFIX 0.954 H27 C27) which reduced the residual electron density to  $< 0.55 \text{ e } \text{\AA}^{-3}$ .

Crystal **5i** was small and weakly diffracting but was the best of nine crystals screened. Much of the high angle data were weak despite selecting a data collection strategy with long exposure times and were omitted in the latter stages of refinement (OMIT -3 45). Despite omitting these high angle reflections, sufficient data were maintained to provide a data:parameter ratio of approximately 10:1.

The structure of **5t** displayed positional disorder on two n-propyl groups, both of which were modelled over two positions. The relative sof's were refined using a common  $U_{\text{iso}}$  for the C atoms and the sof was fixed with occupancies at 80:20% for the first n-propyl group, C14/C15/C16, and 59:41% for the second group, C31/C32/C33. In the C14-C16 chain a common  $U_{\text{ij}}$  was applied to the two components of C atom disorder (EADP) and the C atoms were modelled anisotropically with common N-C and C-C distances (SADI). H atoms were added to both components in the latter stages of refinement. In the C31-C33 chain, the C31 atom position and  $U_{\text{ij}}$  was fixed with EADP and EXYZ instructions, the two components of C atom disorder (C32 and C33) were further addressed with EADP and modelled anisotropically with common C-C distances (SADI) prior to addition of the H atoms. This reduced the residual electron density and improved the final  $R_1$  and  $wR_2$  values.

The structure of **6a** displayed rotational disorder on one TMS group in the asymmetric unit and this was modelled over two positions. The relative sof's were refined using a common  $U_{\text{iso}}$  for the C atoms and the sof was then fixed with occupancies at 74:26%. To add the H atoms, the TMS group was modelled over two sites with common  $U_{\text{ij}}$  (EADP) for the two components of C atom disorder, and the C atoms were modelled anisotropically with a common Si-C and C-C bond distance (SADI). DELU instructions were later used to improve the thermal ellipsoids of the C atoms (DELU 0.01 0.01 C78A C78B C79A C79B C80A C80B). This reduced the residual electron density and improved the  $R_1$  and  $wR_2$  values. Additionally, three particularly disagreeable reflections ( $F_o^2 - F_c^2 > 7s$ ) were omitted (OMIT) in latter stages of refinement.

## 4.2 Crystal Structures

Figure S123. Crystal structure of **1b**, thermal ellipsoids drawn at 50% probability. H atoms omitted for clarity, C atoms in black, O in red, N in blue.

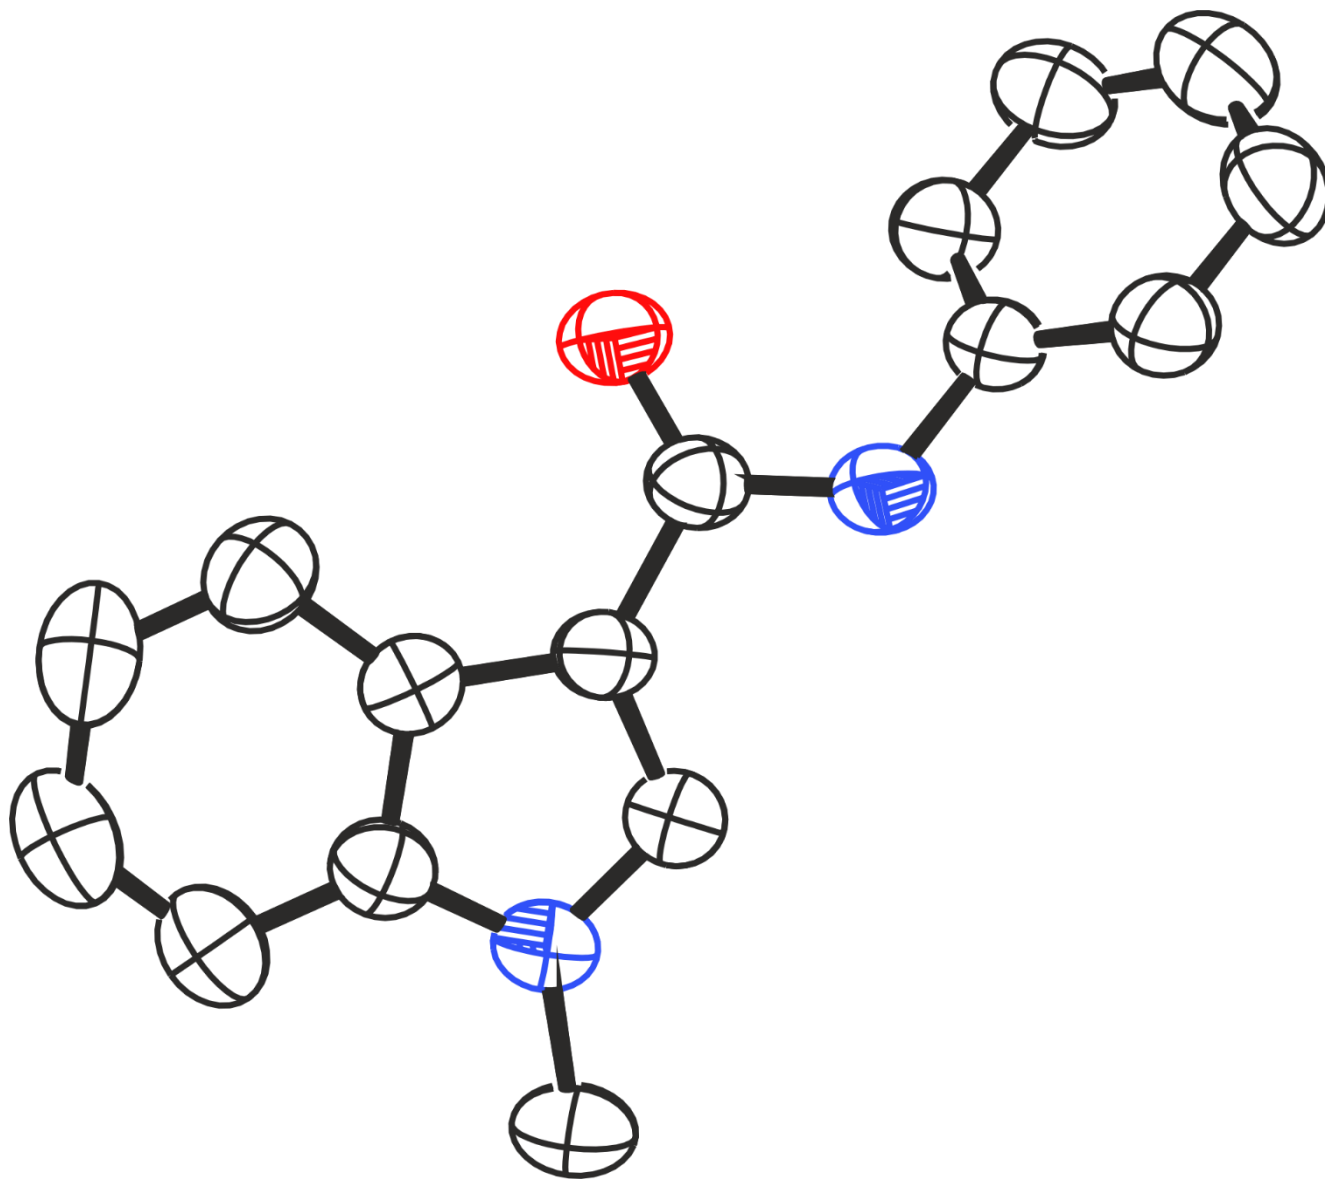

Figure S124. Crystal structure of **1a**·**B(C<sub>6</sub>F<sub>5</sub>)<sub>3</sub>**, thermal ellipsoids drawn at 50% probability. H atoms omitted for clarity, C atoms in black, O in red, N in blue, Cl in bright green, F in light green, B in pink.

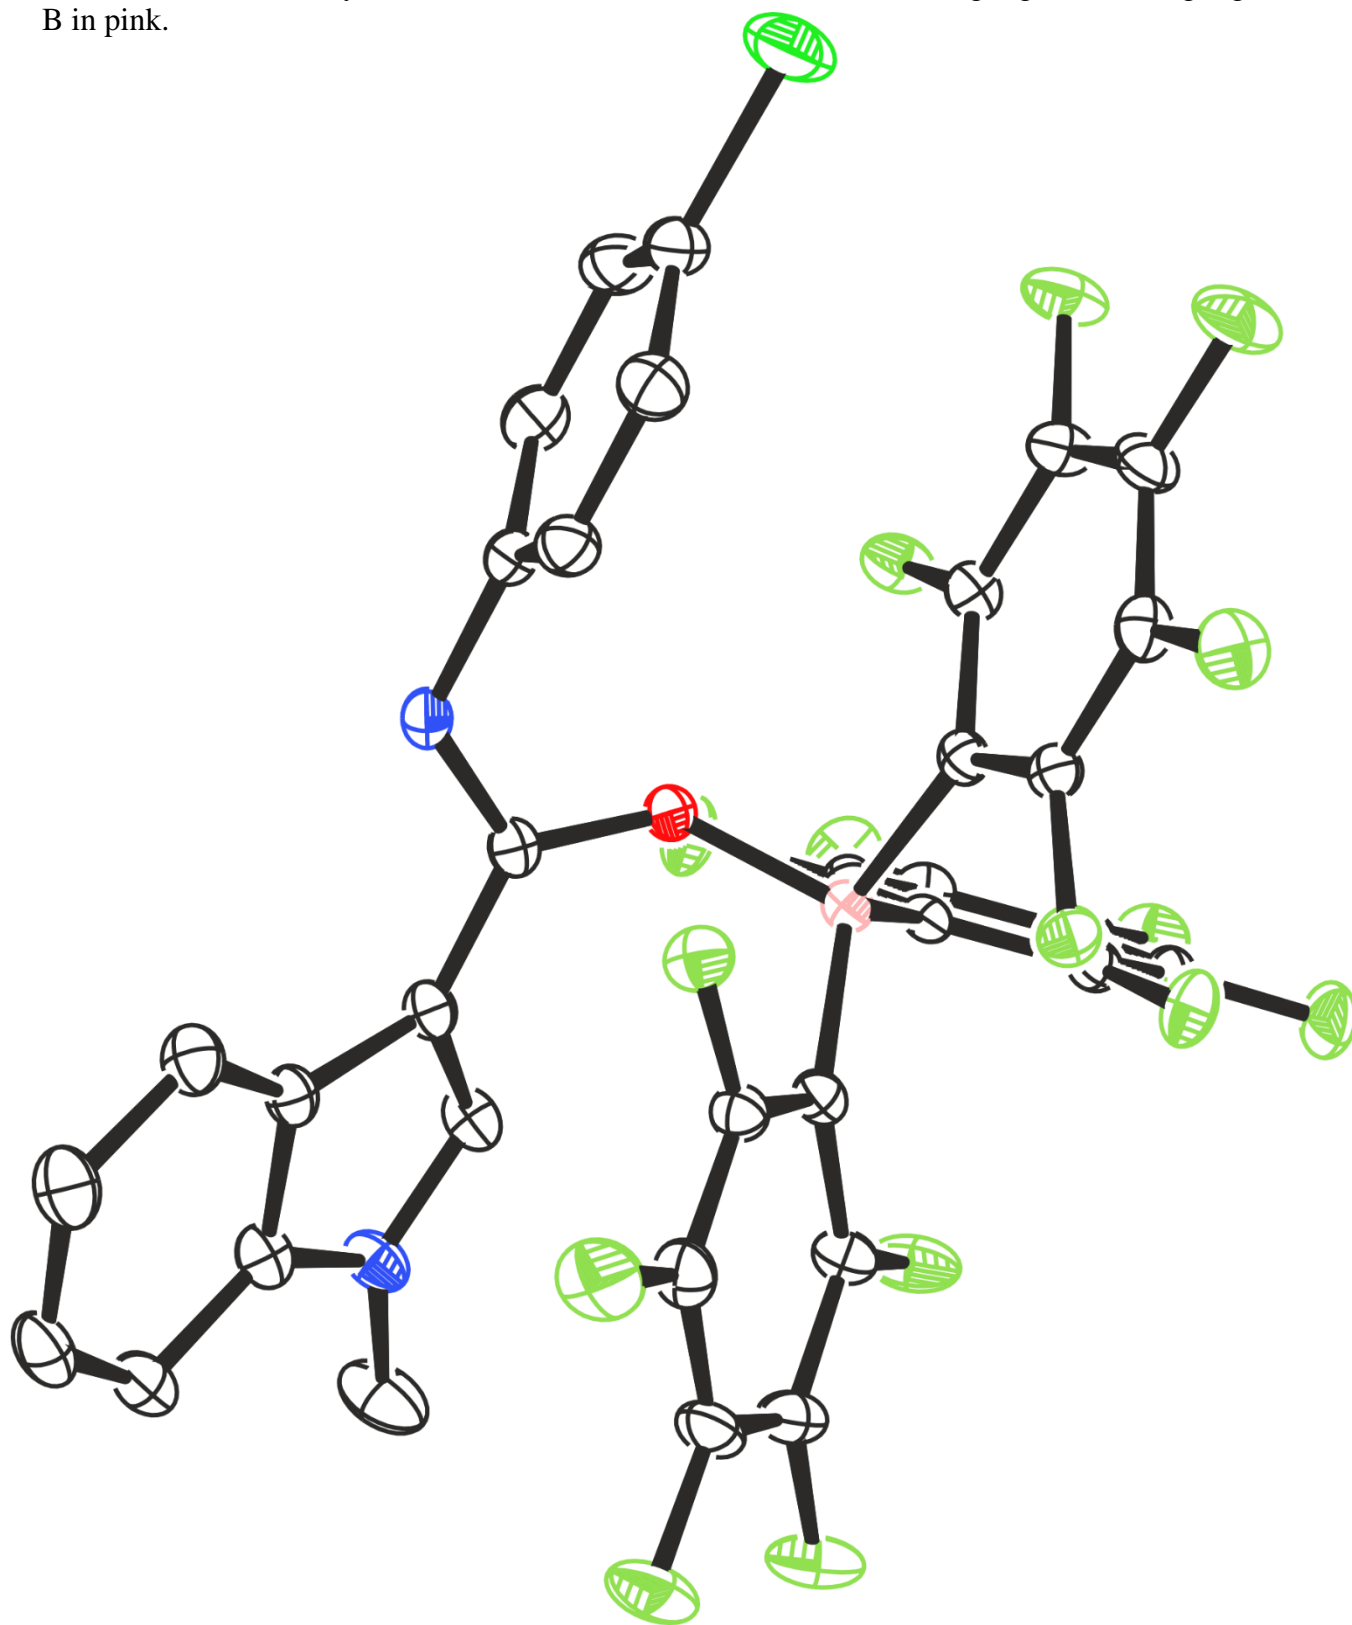

Figure S125. Crystal structure of **1b**·**B(C<sub>6</sub>F<sub>5</sub>)<sub>3</sub>**, thermal ellipsoids drawn at 50% probability. H atoms omitted for clarity, C atoms in black, O in red, N in blue, Cl in bright green, F in light green, B in pink.

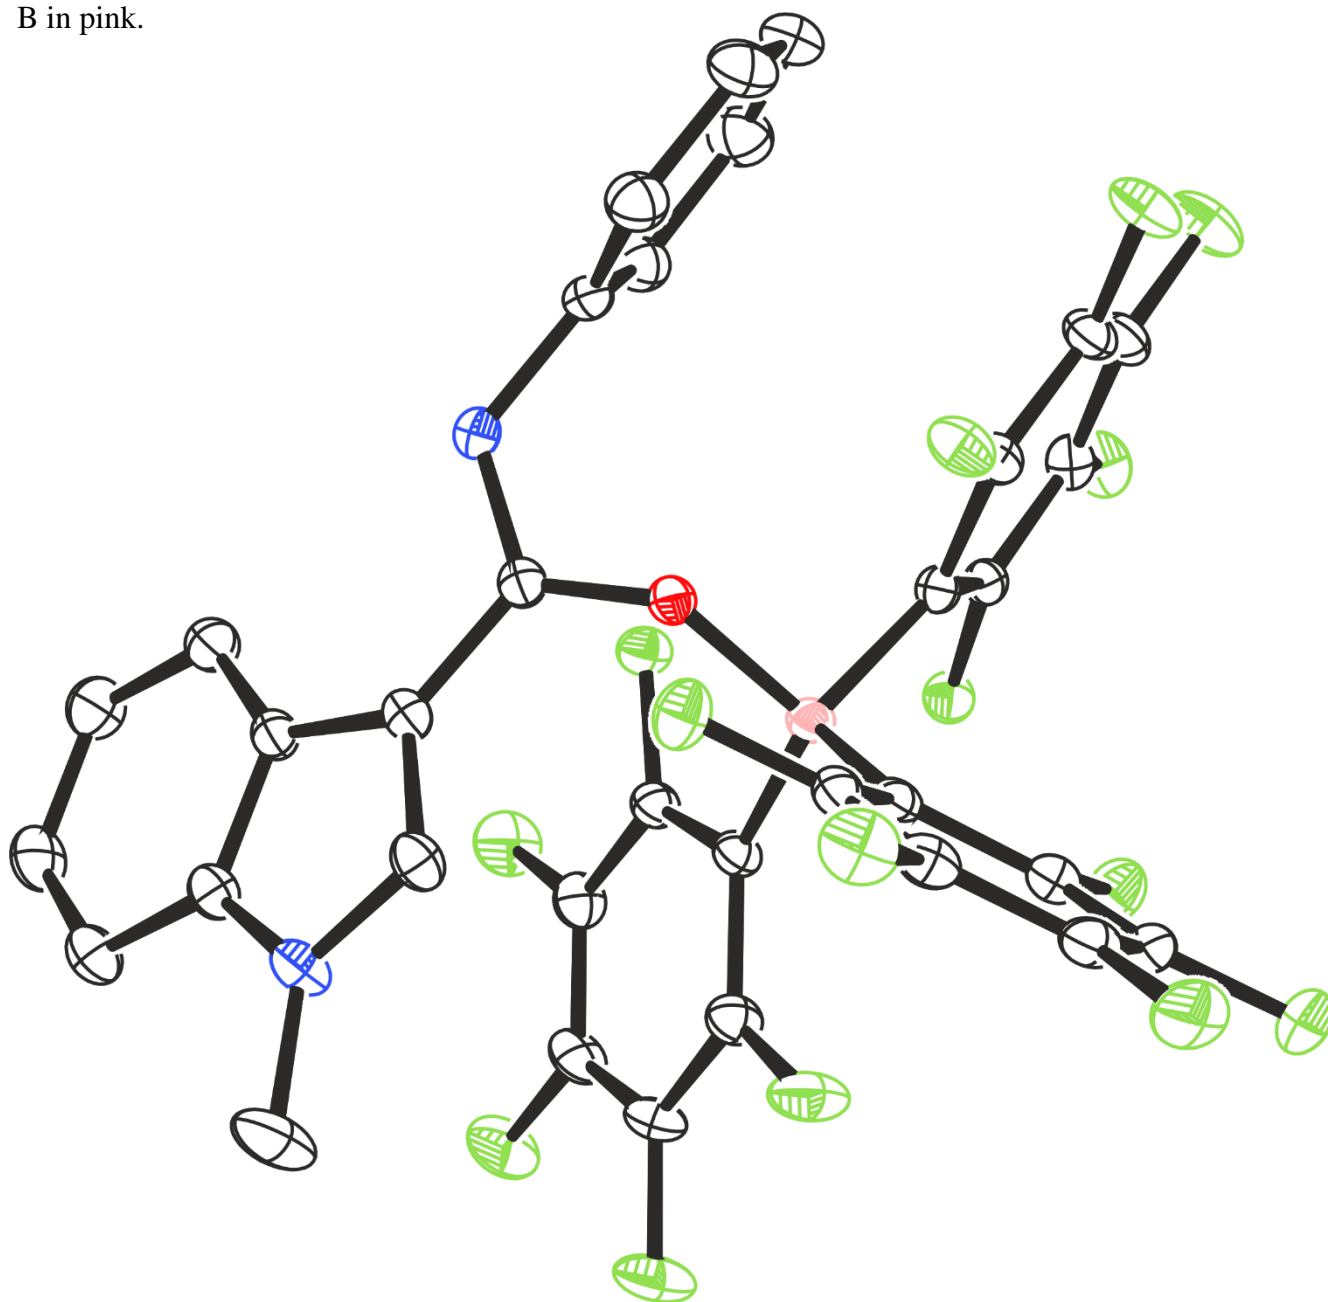

Figure S126. Crystal structure of **2**, thermal ellipsoids drawn at 50% probability. H atoms omitted for clarity, C atoms in black, O in red, N in blue, Cl in bright green, F in light green, B in pink, Br in maroon.

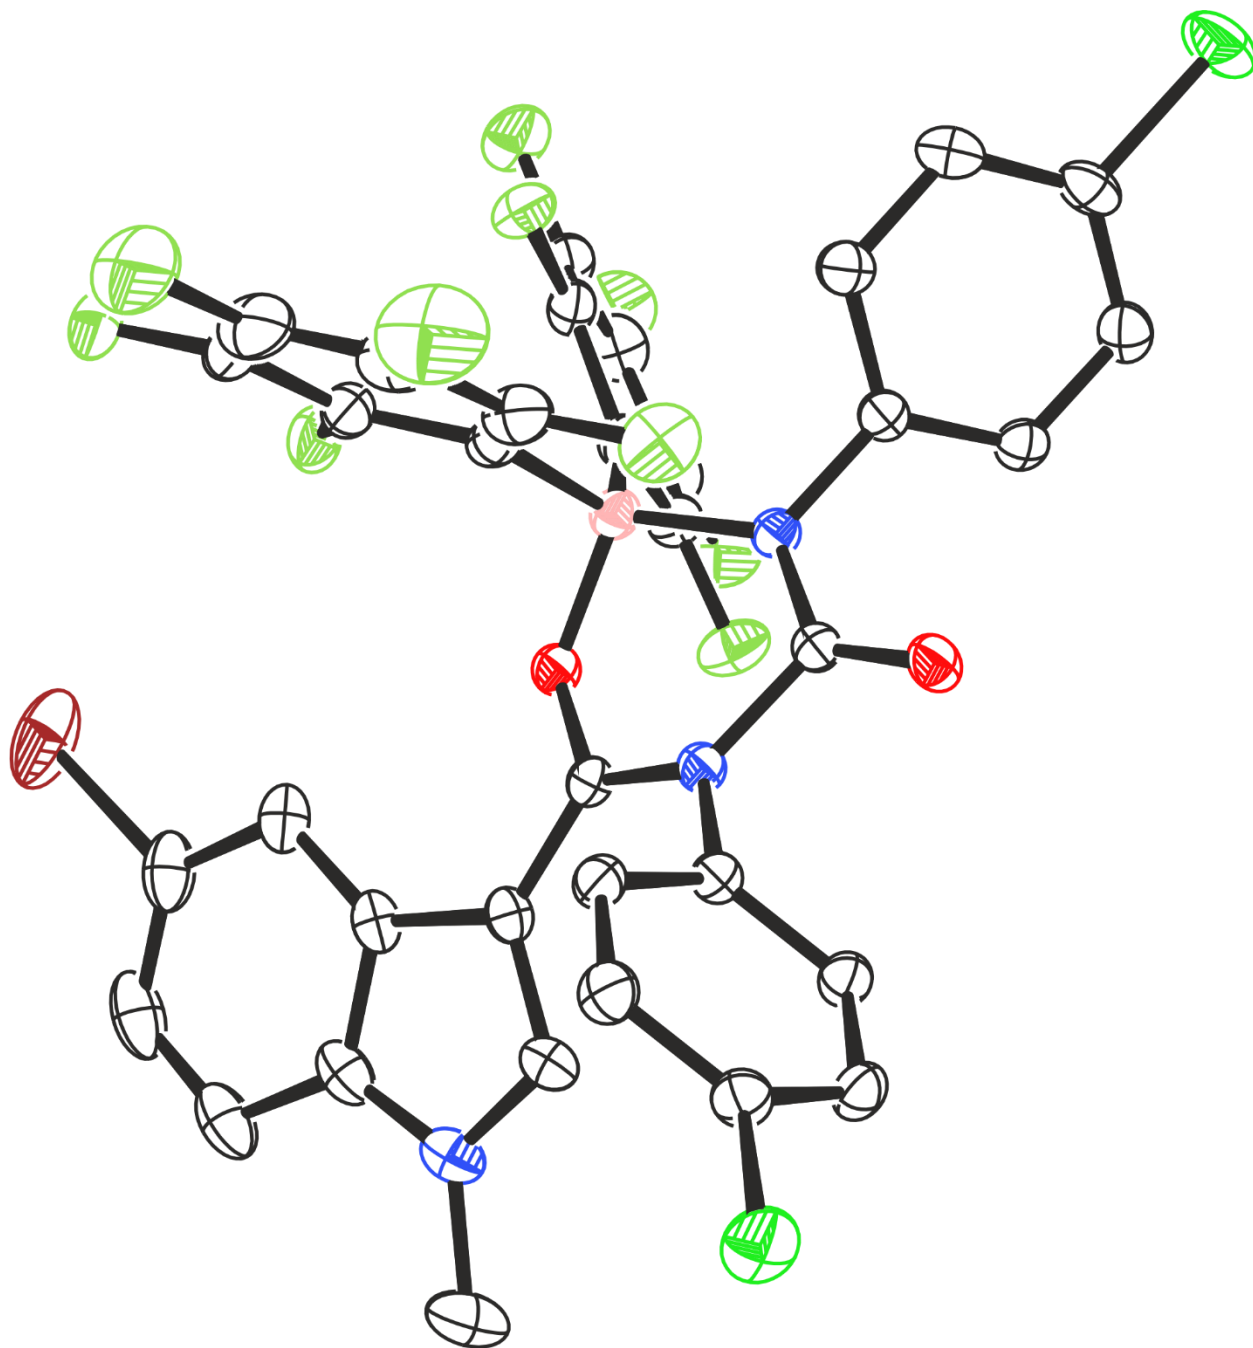

Figure S127. Crystal structure of **3**, thermal ellipsoids drawn at 50% probability. H atoms omitted for clarity, C atoms in black, O in red, N in blue, Cl in bright green, F in light green.

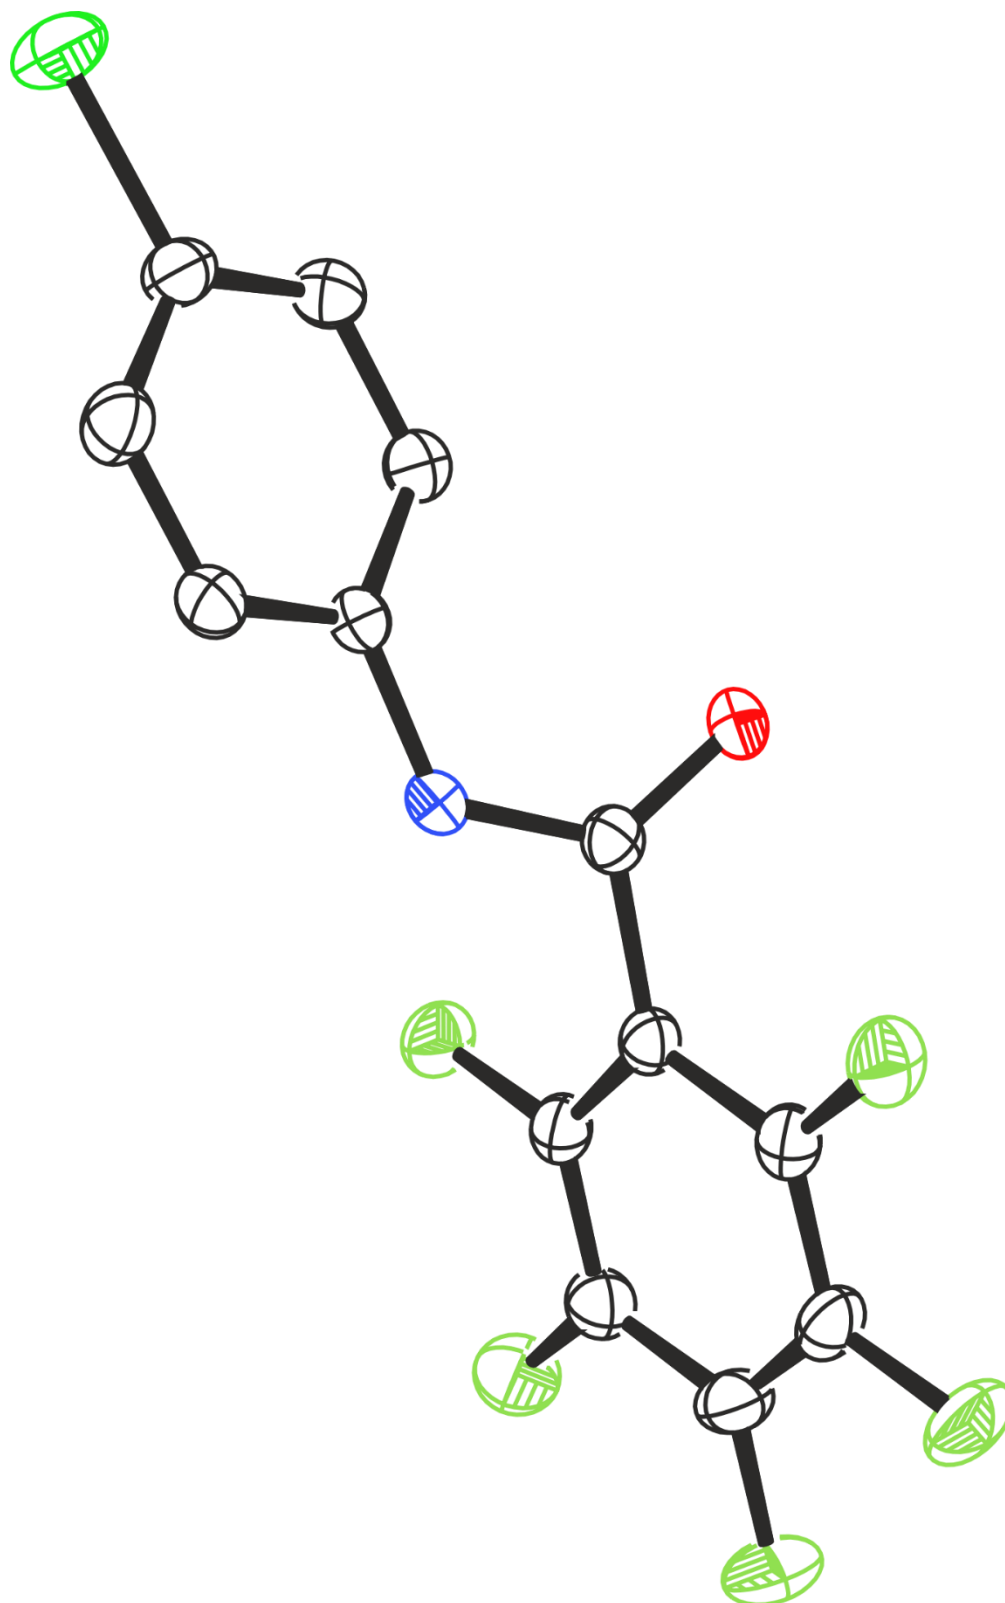

Figure S128. Crystal structure of **4**, thermal ellipsoids drawn at 50% probability. H atoms omitted for clarity, C atoms in black, O in red, N in blue, Cl in green.

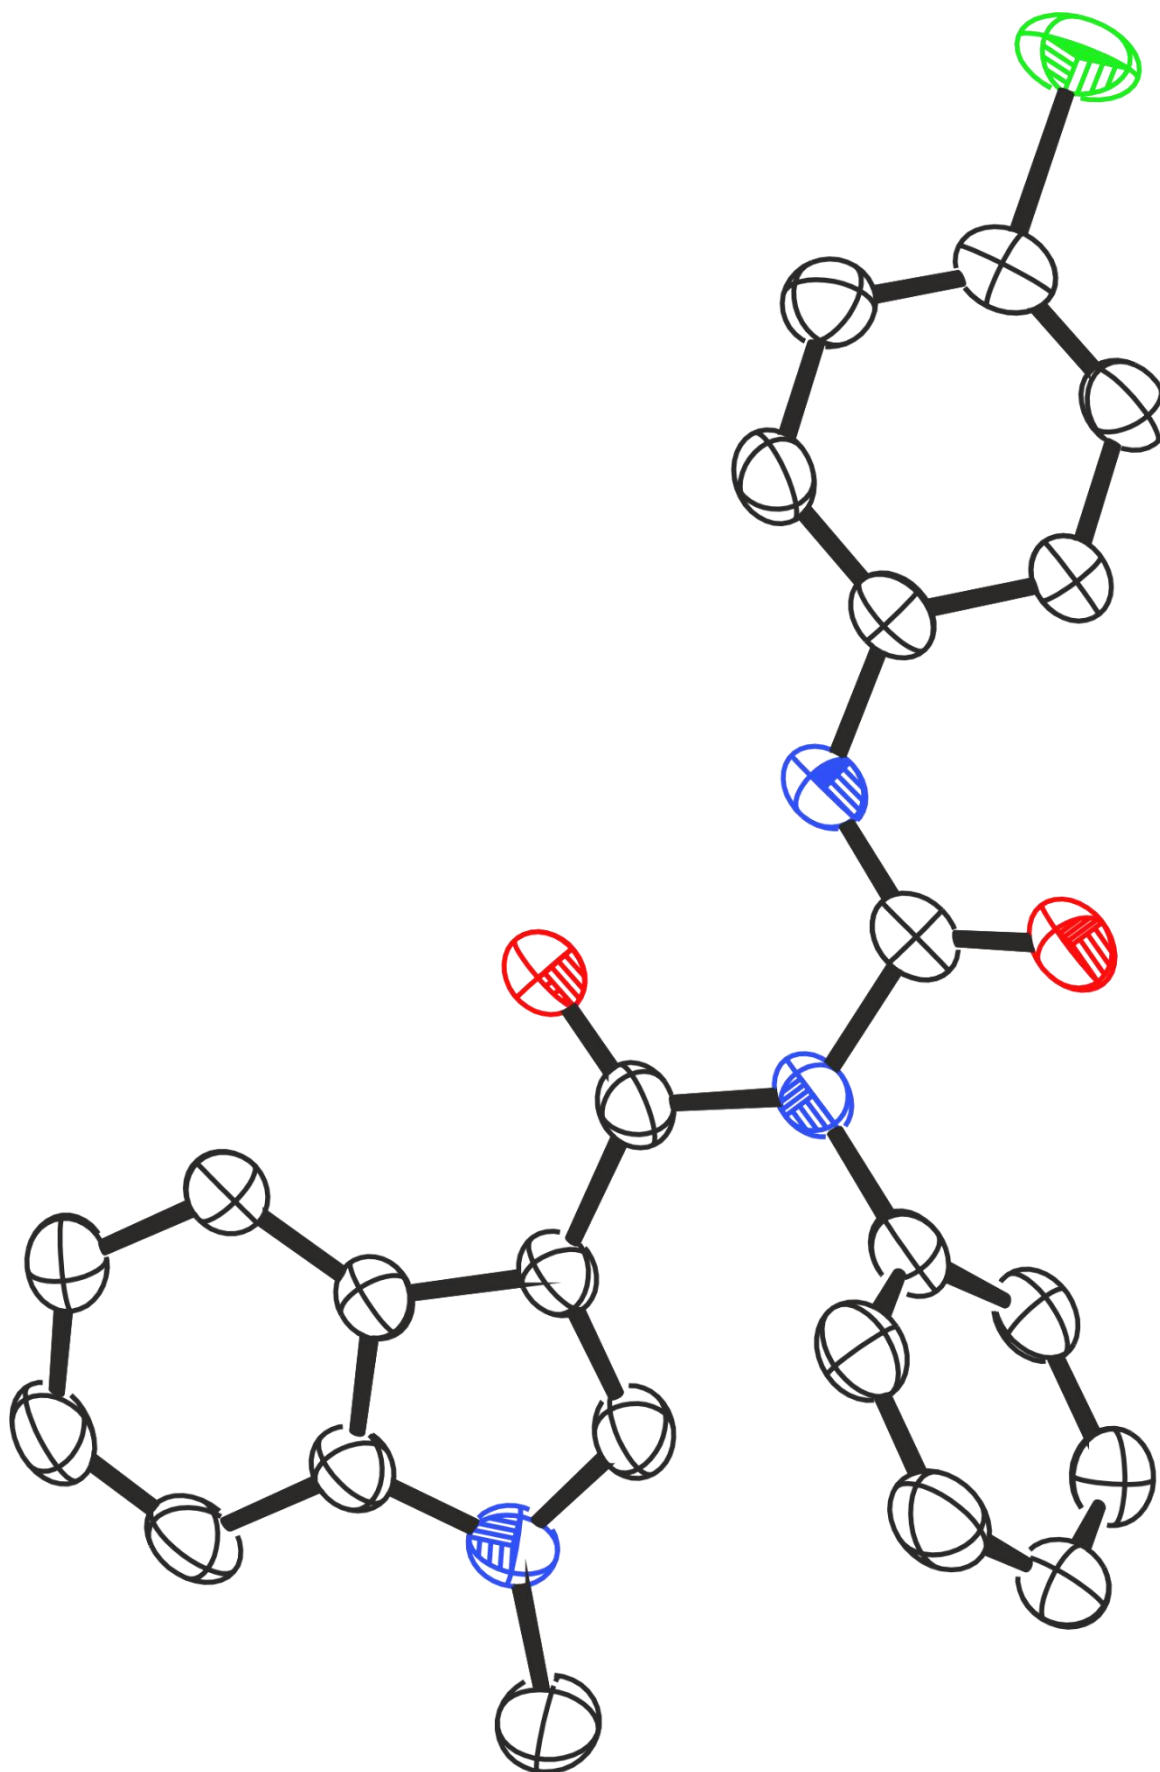

Figure S129. Crystal structure of **5a**, thermal ellipsoids drawn at 50% probability. H atoms omitted for clarity, C atoms in black, O in red, N in blue.

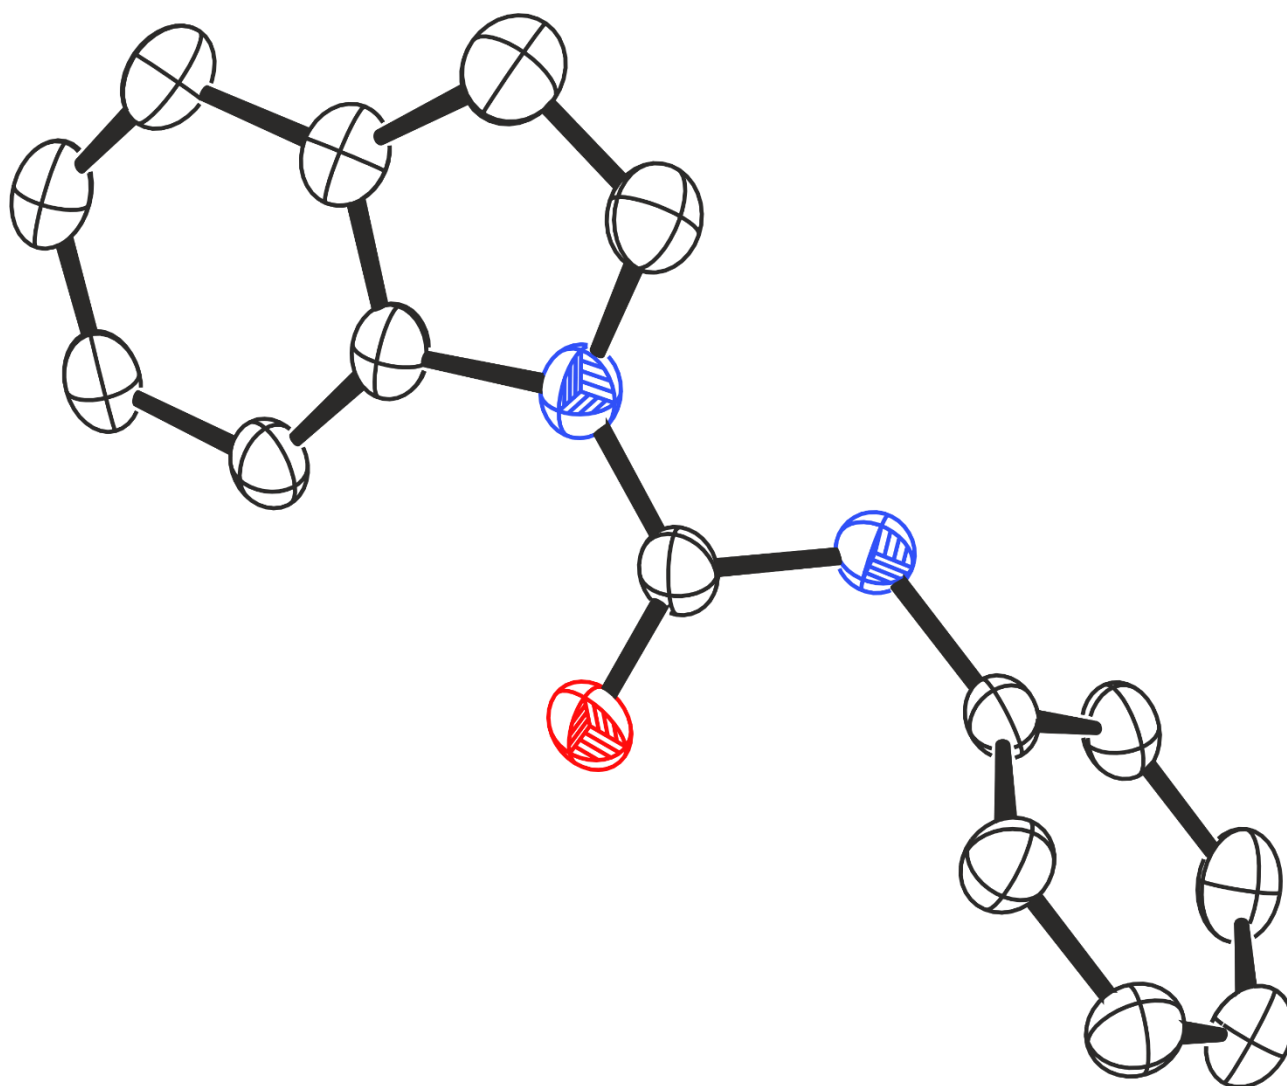



Figure S130. Crystal structure of **5i**, thermal ellipsoids drawn at 50% probability. H atoms omitted for clarity, C atoms in black, O in red, N in blue.

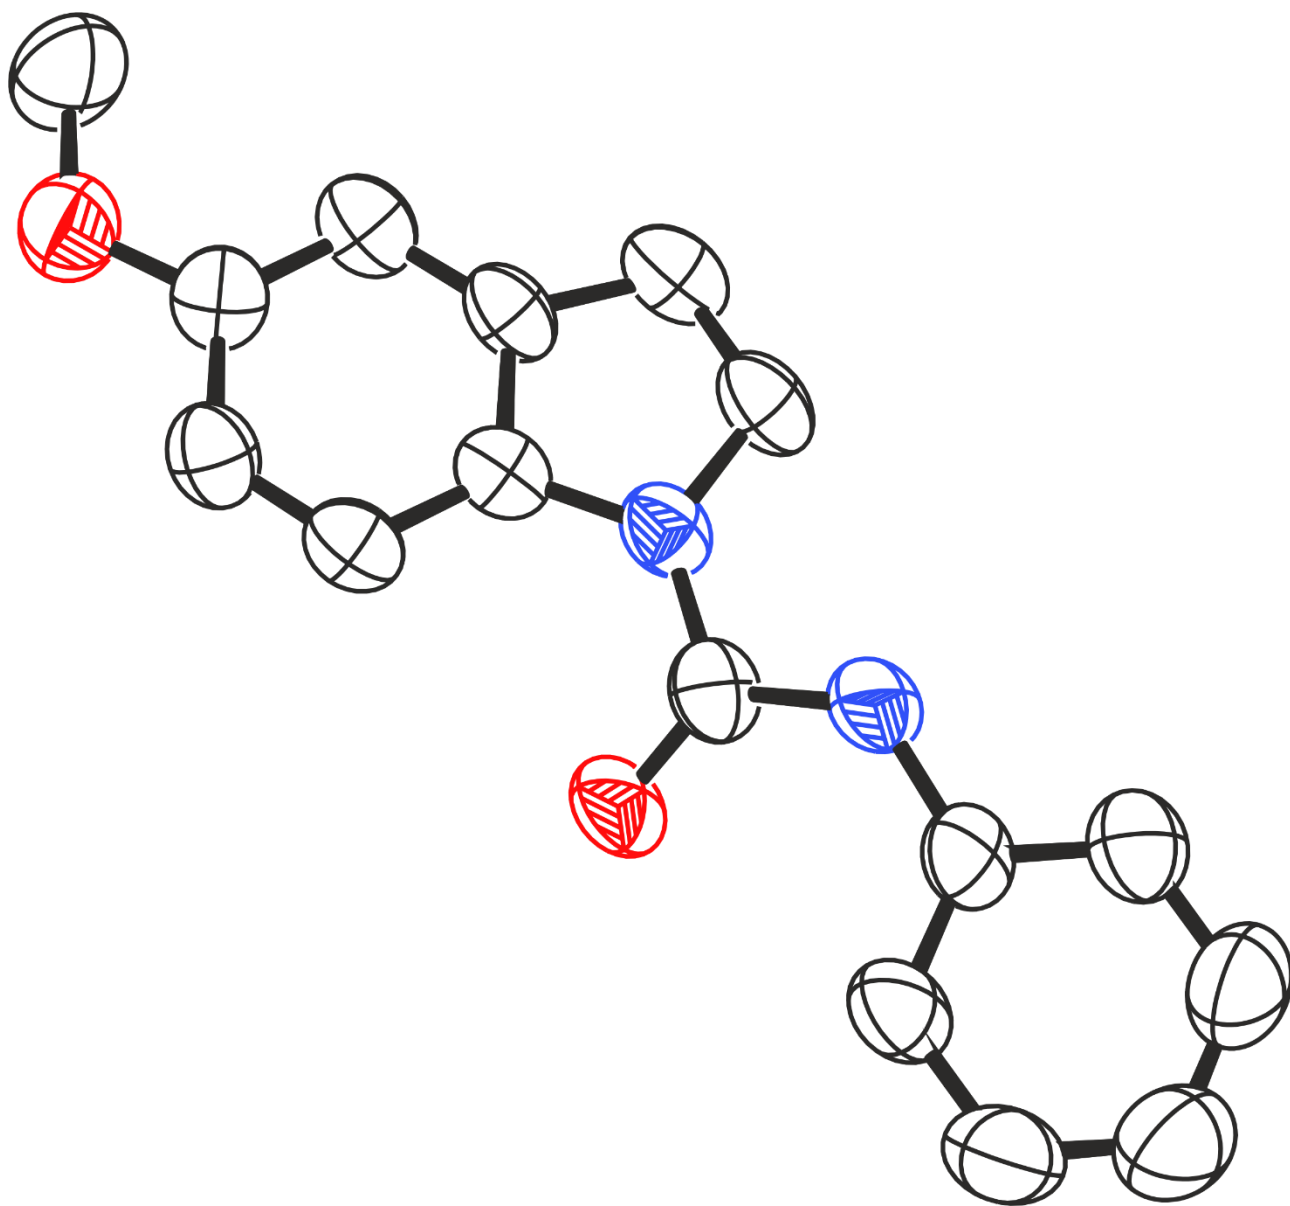

Figure S131. Crystal structure of **5t**, thermal ellipsoids drawn at 50% probability. H atoms omitted for clarity, C atoms in black, O in red, N in blue.

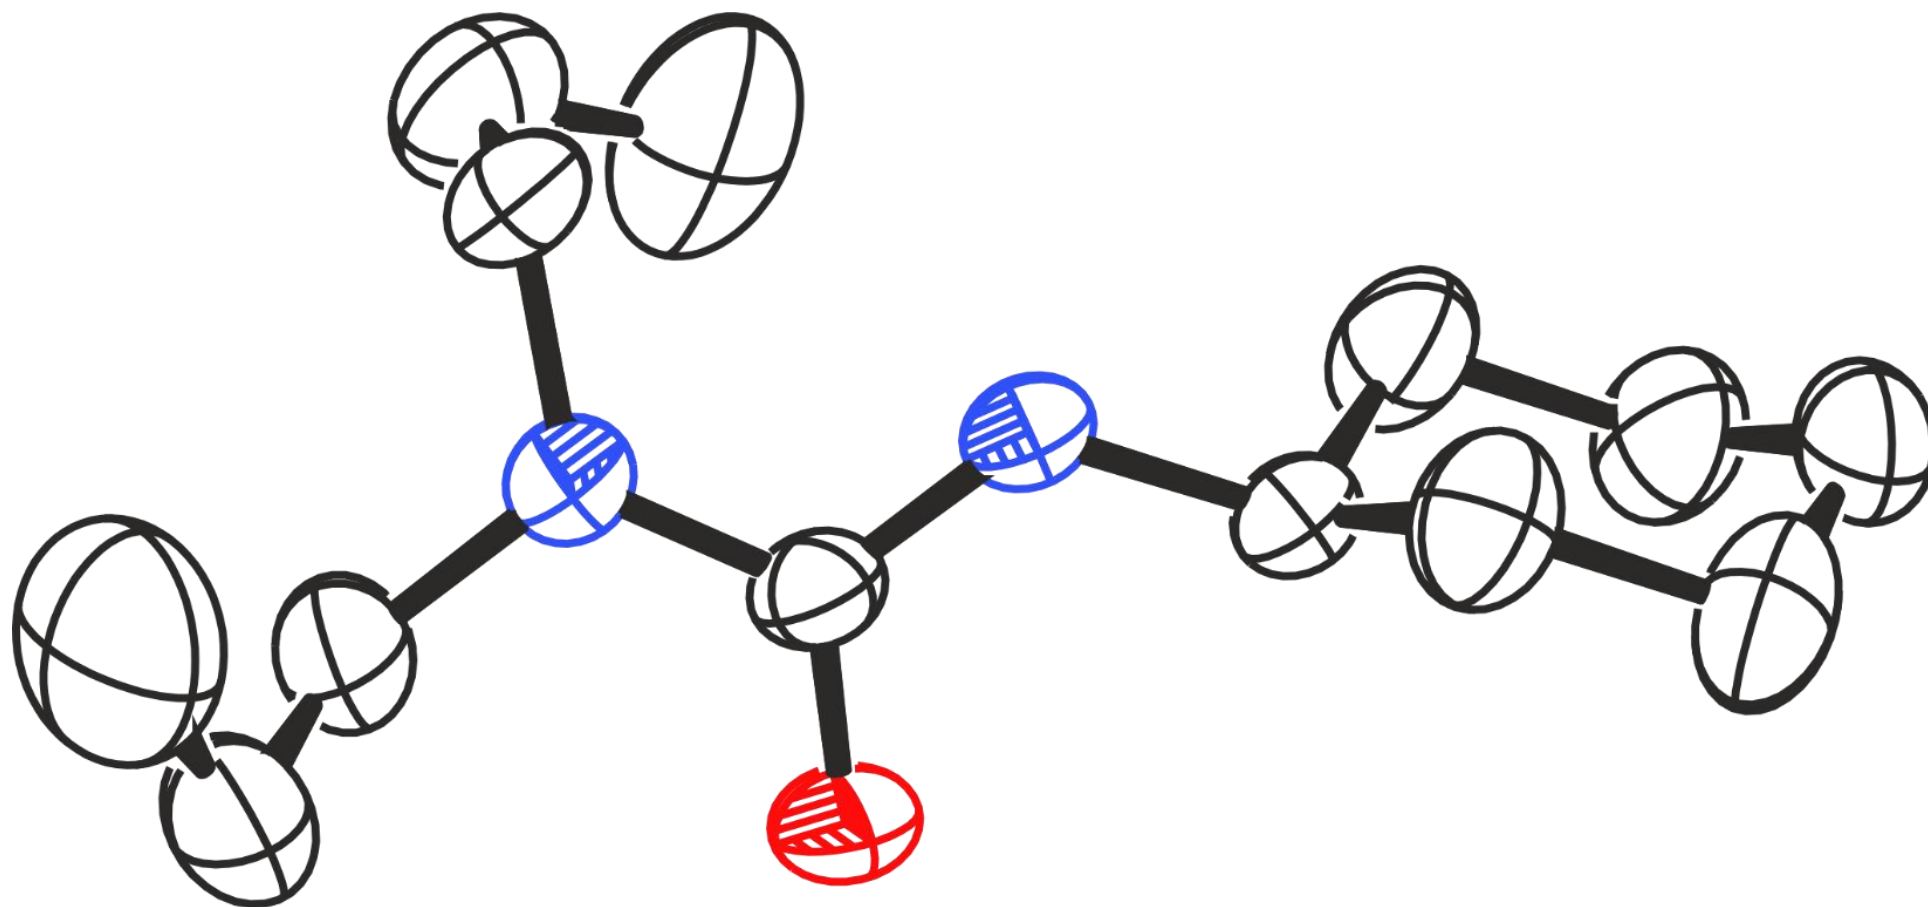

Figure S132. Crystal structure of **6a**, thermal ellipsoids drawn at 50% probability. H atoms omitted for clarity, C atoms in black, O in red, N in blue, Cl in bright green, Si in beige.

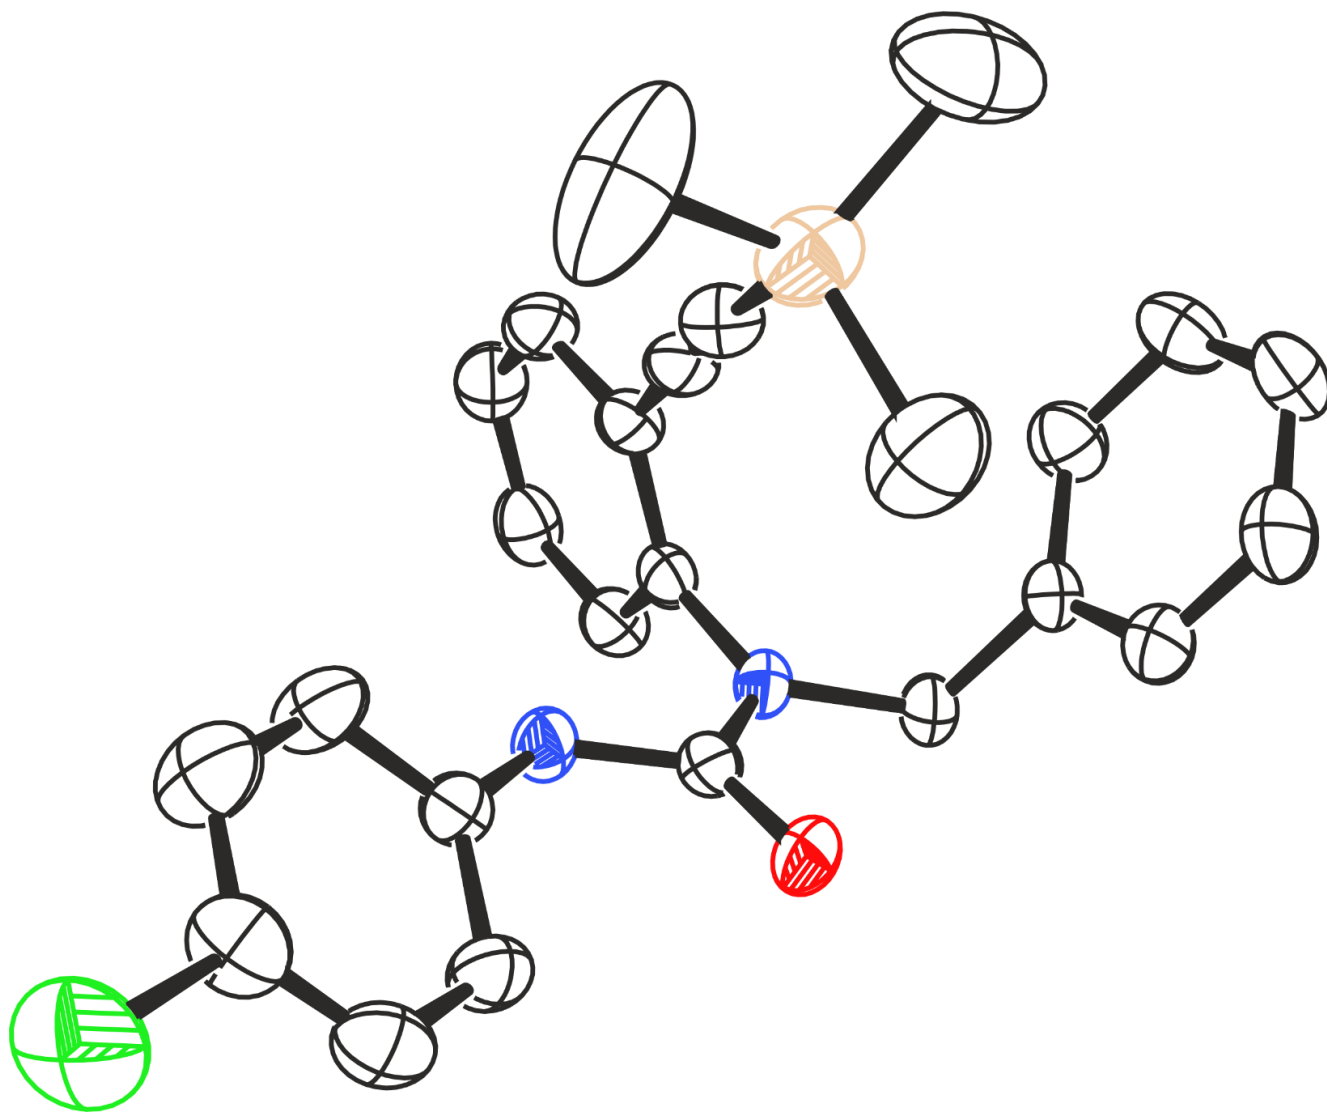

Figure S133. Crystal structure of **10**·BCl<sub>3</sub>, thermal ellipsoids drawn at 50% probability. H atoms omitted for clarity, C atoms in black, N in blue, B in pink, Cl in bright green.

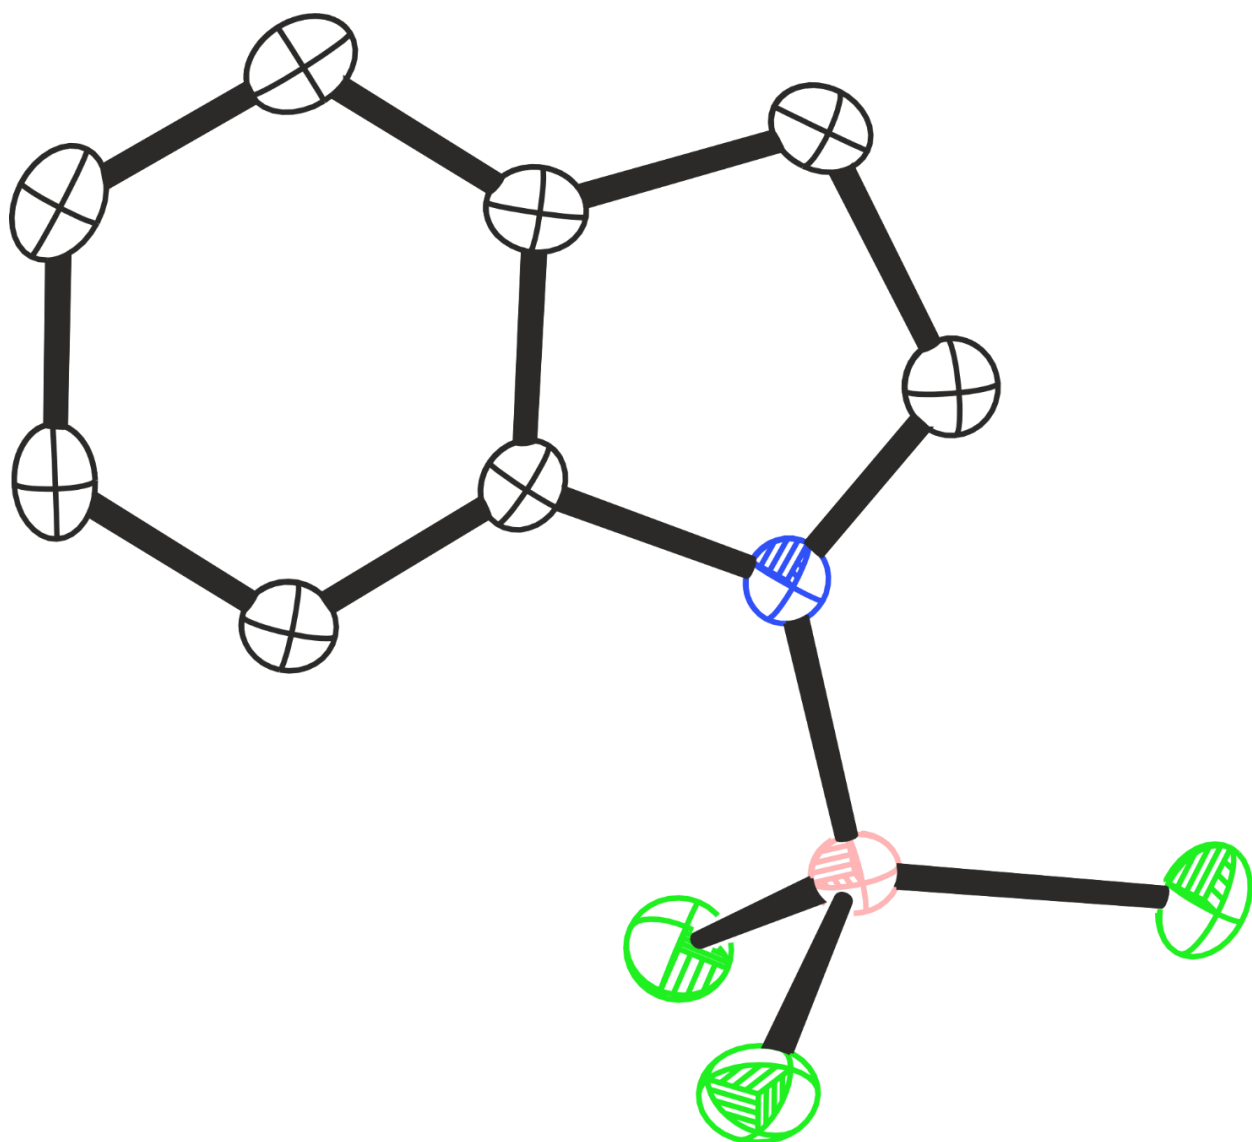

### 4.3 Crystal Structure Data:

Table S2: Crystal data and structure refinement for compound **1b**.

| Compound                                                            | <b>1b</b>                                                           |
|---------------------------------------------------------------------|---------------------------------------------------------------------|
| Empirical formula                                                   | C <sub>16</sub> H <sub>14</sub> N <sub>2</sub> O                    |
| <i>M</i> <sub>r</sub>                                               | 250.29                                                              |
| Crystal system                                                      | Monoclinic                                                          |
| Space group                                                         | <i>P</i> 2 <sub>1</sub> / <i>c</i>                                  |
| Temperature (K)                                                     | 298                                                                 |
| <i>a</i> , <i>b</i> , <i>c</i> (Å)                                  | 22.5646 (17), 13.0075 (10), 8.9569 (10)                             |
| $\alpha$ , $\beta$ , $\gamma$ (°)                                   | 90, 95.530 (8), 90                                                  |
| Volume, <i>V</i> (Å <sup>3</sup> )                                  | 2616.7 (4)                                                          |
| <i>Z</i>                                                            | 8                                                                   |
| Density, calc (g cm <sup>-3</sup> )                                 | 1.271                                                               |
| Absorption coefficient, $\mu$ (mm <sup>-1</sup> )                   | 0.08                                                                |
| Crystal size (mm)                                                   | 0.29 × 0.07 × 0.05                                                  |
| Radiation type                                                      | Mo K $\alpha$                                                       |
| Wavelength (Å)                                                      | 0.71073                                                             |
| $\theta$ range (°)                                                  | 3.7–21.8                                                            |
| Index ranges                                                        | $-26 \leq h \leq 26$<br>$-15 \leq k \leq 15$<br>$-8 \leq l \leq 10$ |
| Reflections collected                                               | 21848                                                               |
| Independent reflections                                             | 4601                                                                |
| R(int)                                                              | 0.086                                                               |
| Absorption correction                                               | Gaussian                                                            |
| Data / restraints / parameters                                      | 4601 / 1 / 359                                                      |
| Goodness of fit, <i>S</i>                                           | 1.072                                                               |
| Final R indices [ <i>I</i> > 2 $\sigma$ ( <i>I</i> )]               | R <sub>1</sub> = 0.0650<br>wR <sub>2</sub> = 0.1463                 |
| R indices (all data)                                                | R <sub>1</sub> = 0.1563<br>wR <sub>2</sub> = 0.1930                 |
| Min/Max residual electron density (e <sup>-</sup> Å <sup>-3</sup> ) | 0.16, -0.21                                                         |

Table S3: Crystal data and structure refinement for compound **1a·B(C<sub>6</sub>F<sub>5</sub>)<sub>3</sub>**.

| Compound                                                            | <b>1a·B(C<sub>6</sub>F<sub>5</sub>)<sub>3</sub></b>                 |
|---------------------------------------------------------------------|---------------------------------------------------------------------|
| Empirical formula                                                   | C <sub>34</sub> H <sub>13</sub> BClF <sub>15</sub> N <sub>2</sub> O |
| <i>M<sub>r</sub></i>                                                | 796.72                                                              |
| Crystal system                                                      | Triclinic                                                           |
| Space group                                                         | <i>P</i> -1                                                         |
| Temperature (K)                                                     | 180                                                                 |
| <i>a</i> , <i>b</i> , <i>c</i> (Å)                                  | 8.0666 (6), 12.7868 (8), 15.6641 (11)                               |
| $\alpha$ , $\beta$ , $\gamma$ (°)                                   | 77.581 (6), 87.401 (6), 78.419 (6)                                  |
| Volume, <i>V</i> (Å <sup>3</sup> )                                  | 1545.76 (19)                                                        |
| <i>Z</i>                                                            | 2                                                                   |
| Density, calc (g cm <sup>-3</sup> )                                 | 1.712                                                               |
| Absorption coefficient, $\mu$ (mm <sup>-1</sup> )                   | 0.25                                                                |
| Crystal size (mm)                                                   | 0.44 × 0.28 × 0.20                                                  |
| Radiation type                                                      | Mo K $\alpha$                                                       |
| Wavelength (Å)                                                      | 0.71073                                                             |
| $\theta$ range (°)                                                  | 3.7–29.5                                                            |
| Index ranges                                                        | -11 ≤ <i>h</i> ≤ 10<br>-17 ≤ <i>k</i> ≤ 17<br>-20 ≤ <i>l</i> ≤ 21   |
| Reflections collected                                               | 15105                                                               |
| Independent reflections                                             | 7363                                                                |
| R(int)                                                              | 0.025                                                               |
| Absorption correction                                               | Gaussian                                                            |
| Data / restraints / parameters                                      | 7363 / 0 / 492                                                      |
| Goodness of fit, <i>S</i>                                           | 0.969                                                               |
| Final R indices [ <i>I</i> > 2 $\sigma$ ( <i>I</i> )]               | R <sub>1</sub> = 0.0451<br>wR <sub>2</sub> = 0.0940                 |
| R indices (all data)                                                | R <sub>1</sub> = 0.1125<br>wR <sub>2</sub> = 0.0703                 |
| Max/Min residual electron density (e <sup>-</sup> Å <sup>-3</sup> ) | 0.33, -0.45                                                         |

Table S4: Crystal data and structure refinement for compound **1b·B(C<sub>6</sub>F<sub>5</sub>)<sub>3</sub>**.

| <b>Compound</b>                                                     | <b>1b·B(C<sub>6</sub>F<sub>5</sub>)<sub>3</sub></b>               |
|---------------------------------------------------------------------|-------------------------------------------------------------------|
| Empirical formula                                                   | C <sub>34</sub> H <sub>14</sub> BF <sub>15</sub> N <sub>2</sub> O |
| <i>M<sub>r</sub></i>                                                | 762.28                                                            |
| Crystal system                                                      | Triclinic                                                         |
| Space group                                                         | <i>P</i> -1                                                       |
| Temperature (K)                                                     | 180                                                               |
| <i>a</i> , <i>b</i> , <i>c</i> (Å)                                  | 7.9694 (4) , 12.4723 (8), 15.5816 (8)                             |
| $\alpha$ , $\beta$ , $\gamma$ (°)                                   | 78.311 (5), 86.618 (4), 79.065 (4)                                |
| Volume, <i>V</i> (Å <sup>3</sup> )                                  | 1488.76 (15)                                                      |
| <i>Z</i>                                                            | 2                                                                 |
| Density, calc (g cm <sup>-3</sup> )                                 | 1.700                                                             |
| Absorption coefficient, $\mu$ (mm <sup>-1</sup> )                   | 0.17                                                              |
| Crystal size (mm)                                                   | 0.60 × 0.24 × 0.17                                                |
| Radiation type                                                      | Mo K $\alpha$                                                     |
| Wavelength (Å)                                                      | 0.71073                                                           |
| $\theta$ range (°)                                                  | 3.8–28.6                                                          |
| Index ranges                                                        | -10 ≤ <i>h</i> ≤ 10<br>-13 ≤ <i>k</i> ≤ 16<br>-20 ≤ <i>l</i> ≤ 21 |
| Reflections collected                                               | 13554                                                             |
| Independent reflections                                             | 7125                                                              |
| R(int)                                                              | 0.022                                                             |
| Absorption correction                                               | Gaussian                                                          |
| Data / restraints / parameters                                      | 7125 / 0 / 483                                                    |
| Goodness of fit, <i>S</i>                                           | 1.062                                                             |
| Final R indices [ <i>I</i> > 2 $\sigma$ ( <i>I</i> )]               | R <sub>1</sub> = 0.0443<br>wR <sub>2</sub> = 0.0878               |
| R indices (all data)                                                | R <sub>1</sub> = 0.0718<br>wR <sub>2</sub> = 0.1047               |
| Max/Min residual electron density (e <sup>-</sup> Å <sup>-3</sup> ) | 0.30, -0.25                                                       |

Table S5: Crystal data and structure refinement for compound **2**.

| Compound                                                                    | <b>2</b>                                                                                                                          |
|-----------------------------------------------------------------------------|-----------------------------------------------------------------------------------------------------------------------------------|
| Empirical formula                                                           | C <sub>35</sub> H <sub>16</sub> BBrCl <sub>2</sub> F <sub>10</sub> N <sub>3</sub> O <sub>2</sub> ·CH <sub>2</sub> Cl <sub>2</sub> |
| <i>M<sub>r</sub></i>                                                        | 946.04                                                                                                                            |
| Crystal system                                                              | Triclinic                                                                                                                         |
| Space group                                                                 | <i>P</i> -1                                                                                                                       |
| Temperature (K)                                                             | 200                                                                                                                               |
| <i>a</i> , <i>b</i> , <i>c</i> (Å)                                          | 12.7275 (4), 16.2624 (4), 19.5564 (6)                                                                                             |
| $\alpha$ , $\beta$ , $\gamma$ (°)                                           | 69.141 (3), 77.001 (3), 87.734 (2)                                                                                                |
| Volume, <i>V</i> (Å <sup>3</sup> )                                          | 3681.9 (2)                                                                                                                        |
| <i>Z</i>                                                                    | 4                                                                                                                                 |
| Density, calc (g cm <sup>-3</sup> )                                         | 1.707                                                                                                                             |
| Absorption coefficient, $\mu$ (mm <sup>-1</sup> )                           | 5.01                                                                                                                              |
| Crystal size (mm)                                                           | 0.33 × 0.16 × 0.05                                                                                                                |
| Radiation type                                                              | Cu K $\alpha$                                                                                                                     |
| Wavelength (Å)                                                              | 1.54178                                                                                                                           |
| $\theta$ range (°)                                                          | 3.8–73.0                                                                                                                          |
| Index ranges                                                                | -15 ≤ <i>h</i> ≤ 12<br>-14 ≤ <i>k</i> ≤ 20<br>-24 ≤ <i>l</i> ≤ 23                                                                 |
| Reflections collected                                                       | 26747                                                                                                                             |
| Independent reflections                                                     | 14256                                                                                                                             |
| R(int)                                                                      | 0.034                                                                                                                             |
| Absorption correction                                                       | Gaussian                                                                                                                          |
| Data / restraints / parameters                                              | 14256 / 3 / 1047                                                                                                                  |
| Goodness of fit, <i>S</i>                                                   | 1.040                                                                                                                             |
| Final R indices [ <i>I</i> > 2 $\sigma$ ( <i>I</i> )]                       | R <sub>1</sub> = 0.0584<br>wR <sub>2</sub> = 0.1632                                                                               |
| R indices (all data)                                                        | R <sub>1</sub> = 0.0699<br>wR <sub>2</sub> = 0.1792                                                                               |
| Max/Min residual electron density ( <i>e</i> <sup>-</sup> Å <sup>-3</sup> ) | 1.39, -1.45                                                                                                                       |



Table S6: Crystal data and structure refinement for compound **3**.

| <b>Compound</b>                                                     | <b>3</b>                                                       |
|---------------------------------------------------------------------|----------------------------------------------------------------|
| Empirical formula                                                   | C <sub>13</sub> H <sub>5</sub> ClF <sub>5</sub> NO             |
| <i>M</i> <sub>r</sub>                                               | 321.63                                                         |
| Crystal system                                                      | Monoclinic                                                     |
| Space group                                                         | <i>P</i> 2 <sub>1</sub> / <i>n</i>                             |
| Temperature (K)                                                     | 180                                                            |
| <i>a</i> , <i>b</i> , <i>c</i> (Å)                                  | 5.6086 (2), 9.3087 (3), 23.8205 (7)                            |
| α, β, γ (°)                                                         | 90, 90.950 (3), 90                                             |
| Volume, <i>V</i> (Å <sup>3</sup> )                                  | 1243.47 (7)                                                    |
| <i>Z</i>                                                            | 4                                                              |
| Density, calc (g cm <sup>-3</sup> )                                 | 1.718                                                          |
| Absorption coefficient, μ (mm <sup>-1</sup> )                       | 3.34                                                           |
| Crystal size (mm)                                                   | 0.55 × 0.47 × 0.10                                             |
| Radiation type                                                      | Cu Kα                                                          |
| Wavelength (Å)                                                      | 1.54178                                                        |
| θ range (°)                                                         | 3.7–72.7                                                       |
| Index ranges                                                        | -6 ≤ <i>h</i> ≤ 6<br>-6 ≤ <i>k</i> ≤ 11<br>-29 ≤ <i>l</i> ≤ 29 |
| Reflections collected                                               | 4597                                                           |
| Independent reflections                                             | 2393                                                           |
| R(int)                                                              | 0.025                                                          |
| Absorption correction                                               | Gaussian                                                       |
| Data / restraints / parameters                                      | 4597 / 0 / 190                                                 |
| Goodness of fit, <i>S</i>                                           | 1.043                                                          |
| Final R indices [ <i>I</i> > 2σ( <i>I</i> )]                        | R <sub>1</sub> = 0.0377<br>wR <sub>2</sub> = 0.0997            |
| R indices (all data)                                                | R <sub>1</sub> = 0.0431<br>wR <sub>2</sub> = 0.1053            |
| Max/Min residual electron density (e <sup>-</sup> Å <sup>-3</sup> ) | 0.26, -0.40                                                    |

Table S7: Crystal data and structure refinement for compound **4**.

| Compound                                                            | <b>4</b>                                                           |
|---------------------------------------------------------------------|--------------------------------------------------------------------|
| Empirical formula                                                   | C <sub>23</sub> H <sub>18</sub> ClN <sub>3</sub> O <sub>2</sub>    |
| <i>M</i> <sub>r</sub>                                               | 403.85                                                             |
| Crystal system                                                      | Orthorhombic                                                       |
| Space group                                                         | <i>P</i> 21 21 21                                                  |
| Temperature (K)                                                     | 298                                                                |
| <i>a</i> , <i>b</i> , <i>c</i> (Å)                                  | 5.7822(3), 12.3852(6), 27.1093(14)                                 |
| $\alpha$ , $\beta$ , $\gamma$ (°)                                   | 90, 90, 90                                                         |
| Volume, <i>V</i> (Å <sup>3</sup> )                                  | 1941.40 (17)                                                       |
| <i>Z</i>                                                            | 4                                                                  |
| Density, calc (g cm <sup>-3</sup> )                                 | 1.382                                                              |
| Absorption coefficient, $\mu$ (mm <sup>-1</sup> )                   | 1.95                                                               |
| Crystal size (mm)                                                   | 0.66 × 0.06 × 0.04                                                 |
| Radiation type                                                      | Cu K $\alpha$                                                      |
| Wavelength (Å)                                                      | 1.54178                                                            |
| $\theta$ range (°)                                                  | 3.9–72.8                                                           |
| Index ranges                                                        | $-6 \leq h \leq 6$<br>$-10 \leq k \leq 15$<br>$-33 \leq l \leq 28$ |
| Reflections collected                                               | 7005                                                               |
| Independent reflections                                             | 3727                                                               |
| R(int)                                                              | 0.058                                                              |
| Absorption correction                                               | Gaussian                                                           |
| Data / restraints / parameters                                      | 3727 / 0 / 263                                                     |
| Goodness of fit, <i>S</i>                                           | 1.027                                                              |
| Final R indices [ <i>I</i> > 2 $\sigma$ ( <i>I</i> )]               | R <sub>1</sub> = 0.0667<br>wR <sub>2</sub> = 0.1709                |
| R indices (all data)                                                | R <sub>1</sub> = 0.0764<br>wR <sub>2</sub> = 0.1829                |
| Max/Min residual electron density (e <sup>-</sup> Å <sup>-3</sup> ) | 0.42, -0.38                                                        |

Table S8: Crystal data and structure refinement for compound **5a**.

| <b>Compound</b>                                                     | <b>5a</b>                                                      |
|---------------------------------------------------------------------|----------------------------------------------------------------|
| Empirical formula                                                   | C <sub>15</sub> H <sub>12</sub> N <sub>2</sub> O               |
| <i>M</i> <sub>r</sub>                                               | 236.27                                                         |
| Crystal system                                                      | Monoclinic                                                     |
| Space group                                                         | <i>P</i> 2 <sub>1</sub> / <i>c</i>                             |
| Temperature (K)                                                     | 180                                                            |
| <i>a</i> , <i>b</i> , <i>c</i> (Å)                                  | 5.5956 (4), 23.7388 (13), 9.2195 (6)                           |
| α, β, γ (°)                                                         | 90, 99.725 (7), 90                                             |
| Volume, <i>V</i> (Å <sup>3</sup> )                                  | 1207.05 (14)                                                   |
| <i>Z</i>                                                            | 4                                                              |
| Density, calc (g cm <sup>-3</sup> )                                 | 1.300                                                          |
| Absorption coefficient, μ (mm <sup>-1</sup> )                       | 0.08                                                           |
| Crystal size (mm)                                                   | 0.30 × 0.20 × 0.08                                             |
| Radiation type                                                      | Mo Kα                                                          |
| Wavelength (Å)                                                      | 0.71073                                                        |
| θ range (°)                                                         | 4.1–28.3                                                       |
| Index ranges                                                        | -7 ≤ <i>h</i> ≤ 6<br>-32 ≤ <i>k</i> ≤ 29<br>-12 ≤ <i>l</i> ≤ 9 |
| Reflections collected                                               | 6033                                                           |
| Independent reflections                                             | 2867                                                           |
| R(int)                                                              | 0.025                                                          |
| Absorption correction                                               | Gaussian                                                       |
| Data / restraints / parameters                                      | 2867 / 1 / 173                                                 |
| Goodness of fit, <i>S</i>                                           | 1.08                                                           |
| Final R indices [ <i>I</i> > 2σ( <i>I</i> )]                        | R <sub>1</sub> = 0.0519<br>wR <sub>2</sub> = 0.1231            |
| R indices (all data)                                                | R <sub>1</sub> = 0.0725<br>wR <sub>2</sub> = 0.1371            |
| Max/Min residual electron density (e <sup>-</sup> Å <sup>-3</sup> ) | 0.53, -0.19                                                    |

Table S9: Crystal data and structure refinement for compound **5i**.

| <b>Compound</b>                                                     | <b>5i</b>                                                       |
|---------------------------------------------------------------------|-----------------------------------------------------------------|
| Empirical formula                                                   | C <sub>16</sub> H <sub>14</sub> N <sub>2</sub> O <sub>2</sub>   |
| <i>M</i> <sub>r</sub>                                               | 266.29                                                          |
| Crystal system                                                      | Monoclinic                                                      |
| Space group                                                         | <i>P</i> 2 <sub>1</sub> / <i>c</i>                              |
| Temperature (K)                                                     | 293                                                             |
| <i>a</i> , <i>b</i> , <i>c</i> (Å)                                  | 26.505 (6), 5.5966 (7), 9.4104 (11)                             |
| α, β, γ (°)                                                         | 90, 98.519 (15), 90                                             |
| Volume, <i>V</i> (Å <sup>3</sup> )                                  | 1380.5 (4)                                                      |
| <i>Z</i>                                                            | 4                                                               |
| Density, calc (g cm <sup>-3</sup> )                                 | 1.281                                                           |
| Absorption coefficient, μ (mm <sup>-1</sup> )                       | 0.09                                                            |
| Crystal size (mm)                                                   | 0.21 × 0.10 × 0.06                                              |
| Radiation type                                                      | Mo Kα                                                           |
| Wavelength (Å)                                                      | 0.71073                                                         |
| θ range (°)                                                         | 3.9–20.1                                                        |
| Index ranges                                                        | -28 ≤ <i>h</i> ≤ 19<br>-6 ≤ <i>k</i> ≤ 6<br>-10 ≤ <i>l</i> ≤ 10 |
| Reflections collected                                               | 7061                                                            |
| Independent reflections                                             | 1786                                                            |
| R(int)                                                              | 0.068                                                           |
| Absorption correction                                               | Gaussian                                                        |
| Data / restraints / parameters                                      | 1786 / 1 / 185                                                  |
| Goodness of fit, <i>S</i>                                           | 1.07                                                            |
| Final R indices [ <i>I</i> > 2σ( <i>I</i> )]                        | R <sub>1</sub> = 0.0726<br>wR <sub>2</sub> = 0.1669             |
| R indices (all data)                                                | R <sub>1</sub> = 0.1258<br>wR <sub>2</sub> = 0.2072             |
| Max/Min residual electron density (e <sup>-</sup> Å <sup>-3</sup> ) | 0.21, -0.18                                                     |

Table S10: Crystal data and structure refinement for compound **5t**.

| <b>Compound</b>                                                     | <b>5t</b>                                                        |
|---------------------------------------------------------------------|------------------------------------------------------------------|
| Empirical formula                                                   | C <sub>13</sub> H <sub>26</sub> N <sub>2</sub> O                 |
| <i>M</i> <sub>r</sub>                                               | 226.36                                                           |
| Crystal system                                                      | Monoclinic                                                       |
| Space group                                                         | <i>C</i> 2/ <i>c</i>                                             |
| Temperature (K)                                                     | 293                                                              |
| <i>a</i> , <i>b</i> , <i>c</i> (Å)                                  | 16.5207 (4), 9.9632 (2), 34.8180 (9)                             |
| α, β, γ (°)                                                         | 90, 91.771 (2), 90                                               |
| Volume, <i>V</i> (Å <sup>3</sup> )                                  | 5728.3 (2)                                                       |
| <i>Z</i>                                                            | 16                                                               |
| Density, calc (g cm <sup>-3</sup> )                                 | 1.050                                                            |
| Absorption coefficient, μ (mm <sup>-1</sup> )                       | 0.51                                                             |
| Crystal size (mm)                                                   | 0.59 × 0.11 × 0.05                                               |
| Radiation type                                                      | Cu Kα                                                            |
| Wavelength (Å)                                                      | 1.54178                                                          |
| θ range (°)                                                         | 5.1–72.7                                                         |
| Index ranges                                                        | -20 ≤ <i>h</i> ≤ 18<br>-11 ≤ <i>k</i> ≤ 7<br>-42 ≤ <i>l</i> ≤ 40 |
| Reflections collected                                               | 10376                                                            |
| Independent reflections                                             | 5488                                                             |
| R(int)                                                              | 0.017                                                            |
| Absorption correction                                               | Gaussian                                                         |
| Data / restraints / parameters                                      | 5488 / 13 / 319                                                  |
| Goodness of fit, <i>S</i>                                           | 1.05                                                             |
| Final R indices [ <i>I</i> > 2σ( <i>I</i> )]                        | R <sub>1</sub> = 0.0559<br>wR <sub>2</sub> = 0.1658              |
| R indices (all data)                                                | R <sub>1</sub> = 0.0721<br>wR <sub>2</sub> = 0.1717              |
| Max/Min residual electron density (e <sup>-</sup> Å <sup>-3</sup> ) | 0.16, -0.17                                                      |

Table S11: Crystal data and structure refinement for compound **6a**.

| Compound                                                            | <b>6a</b>                                                         |
|---------------------------------------------------------------------|-------------------------------------------------------------------|
| Empirical formula                                                   | C <sub>25</sub> H <sub>25</sub> ClN <sub>2</sub> OSi              |
| <i>M</i> <sub>r</sub>                                               | 433.01                                                            |
| Crystal system                                                      | Triclinic                                                         |
| Space group                                                         | <i>P</i> -1                                                       |
| Temperature (K)                                                     | 200                                                               |
| <i>a</i> , <i>b</i> , <i>c</i> (Å)                                  | 10.0506 (6), 12.4111 (9), 19.1784 (12)                            |
| α, β, γ (°)                                                         | 99.504 (5), 93.559 (5), 90.568 (5)                                |
| Volume, <i>V</i> (Å <sup>3</sup> )                                  | 2354.4 (3)                                                        |
| <i>Z</i>                                                            | 4                                                                 |
| Density, calc (g cm <sup>-3</sup> )                                 | 1.222                                                             |
| Absorption coefficient, μ (mm <sup>-1</sup> )                       | 2.06                                                              |
| Crystal size (mm)                                                   | 0.18 × 0.13 × 0.03                                                |
| Radiation type                                                      | Cu Kα                                                             |
| Wavelength (Å)                                                      | 1.54178                                                           |
| θ range (°)                                                         | 3.9–72.0                                                          |
| Index ranges                                                        | -10 ≤ <i>h</i> ≤ 12<br>-15 ≤ <i>k</i> ≤ 15<br>-23 ≤ <i>l</i> ≤ 19 |
| Reflections collected                                               | 17234                                                             |
| Independent reflections                                             | 9111                                                              |
| R(int)                                                              | 0.069                                                             |
| Absorption correction                                               | Gaussian                                                          |
| Data / restraints / parameters                                      | 9111 / 30 / 578                                                   |
| Goodness of fit, <i>S</i>                                           | 0.97                                                              |
| Final R indices [ <i>I</i> > 2σ( <i>I</i> )]                        | R <sub>1</sub> = 0.0588<br>wR <sub>2</sub> = 0.1384               |
| R indices (all data)                                                | R <sub>1</sub> = 0.1023<br>wR <sub>2</sub> = 0.1677               |
| Max/Min residual electron density (e <sup>-</sup> Å <sup>-3</sup> ) | 0.28, -0.41                                                       |

Table S12: Crystal data and structure refinement for compound **10**•BCl<sub>3</sub>.

| <b>Compound</b>                                                     | <b>10</b> •BCl <sub>3</sub>                                     |
|---------------------------------------------------------------------|-----------------------------------------------------------------|
| Empirical formula                                                   | C <sub>8</sub> H <sub>7</sub> BCl <sub>3</sub> N                |
| <i>M</i> <sub>r</sub>                                               | 243.31                                                          |
| Crystal system                                                      | Monoclinic                                                      |
| Space group                                                         | <i>C2/m</i>                                                     |
| Temperature (K)                                                     | 180                                                             |
| <i>a</i> , <i>b</i> , <i>c</i> (Å)                                  | 15.121 (2), 6.9264 (7), 9.8879 (13)                             |
| α, β, γ (°)                                                         | 90, 109.906 (14), 90                                            |
| Volume, <i>V</i> (Å <sup>3</sup> )                                  | 973.7 (2)                                                       |
| <i>Z</i>                                                            | 4                                                               |
| Density, calc (g cm <sup>-3</sup> )                                 | 1.598                                                           |
| Absorption coefficient, μ (mm <sup>-1</sup> )                       | 0.89                                                            |
| Crystal size (mm)                                                   | 0.64 × 0.27 × 0.15                                              |
| Radiation type                                                      | Mo Kα                                                           |
| Wavelength (Å)                                                      | 0.71073                                                         |
| θ range (°)                                                         | 4.1 – 28.4                                                      |
| Index ranges                                                        | -20 ≤ <i>h</i> ≤ 20<br>-9 ≤ <i>k</i> ≤ 7<br>-13 ≤ <i>l</i> ≤ 12 |
| Reflections collected                                               | 2544                                                            |
| Independent reflections                                             | 1257                                                            |
| R(int)                                                              | 0.024                                                           |
| Absorption correction                                               | Gaussian                                                        |
| Data / restraints / parameters                                      | 1257 / 0 / 76                                                   |
| Goodness of fit, <i>S</i>                                           | 1.12                                                            |
| Final R indices [ <i>I</i> > 2σ( <i>I</i> )]                        | R <sub>1</sub> = 0.0378<br>wR <sub>2</sub> = 0.0754             |
| R indices (all data)                                                | R <sub>1</sub> = 0.0518<br>wR <sub>2</sub> = 0.0830             |
| Max/Min residual electron density (e <sup>-</sup> Å <sup>-3</sup> ) | 0.34, -0.24                                                     |

## 5. Computational Data

### 5.1 Computational details

Gaussian 16<sup>16</sup> was used to fully optimise all the structures reported in this paper at the M06-2X level of theory.<sup>17</sup> For all the calculations, solvent effects were considered using the SMD solvation model<sup>18</sup> with dichloroethane as the solvent. The 6-31G(d) basis set<sup>19</sup> was used for all atoms. This basis set combination will be referred to as BS1. Frequency calculations were carried out at the same level of theory as those for the structural optimisation. Transition structures were located using the Berny algorithm. Intrinsic reaction coordinate (IRC) calculations were used to confirm the connectivity between transition structures and minima.<sup>20</sup> To further refine the energies obtained from the SMD/M06-2X/6-31G(d) calculations, we carried out single-point energy calculations using the M06-2X functional method for all of the structures with a larger basis set (BS2). BS2 utilises the def2-TZVP basis set<sup>21</sup> on all atoms. Tight convergence criterion and ultrafine integral grid were also employed to increase the accuracy of the calculations. In this work, the free energy for each species in solution was calculated using the following formula:

$$G = E(\text{BS2}) + G(\text{BS1}) - E(\text{BS1}) + \Delta G^{\text{latm} \rightarrow 1\text{M}} \quad (1)$$

where  $\Delta G^{\text{latm} \rightarrow 1\text{M}} = 1.89$  kcal/mol is the free-energy change for compression of 1 mol of an ideal gas from 1 atm to the 1 M solution phase standard state.

To validate the accuracy of the results obtained at the SMD/M06-2X/def2-TZVP/ SMD/M06-2X/6-31G(d) level of theory, some of the key structures were re-optimized using the SMD/M06-2X/def2-TZVP calculations. The results show that this change in methodology has a negligible effect on the relative free energy of the structures. Using the SMD/M06-2X/def2-TZVP/ SMD/M06-2X/6-31G(d) calculations, the relative free energies of **TS**<sub>16-17</sub>, **TS**<sub>18</sub>, **10**·**BCl**<sub>3</sub>, **TS**<sub>10-12</sub>, **5a**·**BCl**<sub>3</sub>, and **5** are 23.2, 29.6, -11.1, 21.9, -11.0, and -3.8 kcal/mol, respectively. Using the SMD/M06-2X/def2-TZVP calculations, the relative free energies are 23.7, 29.7, -11.0, 21.7, -10.7, and -3.8 kcal/mol, respectively.

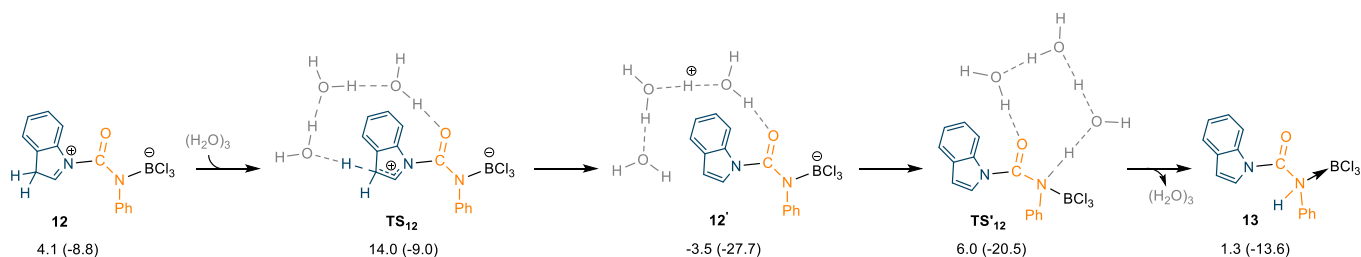

Figure S2. Calculated mechanism for proton transfer converting **12** to **13** mediated by model water cluster  $(\text{H}_2\text{O})_3$ .



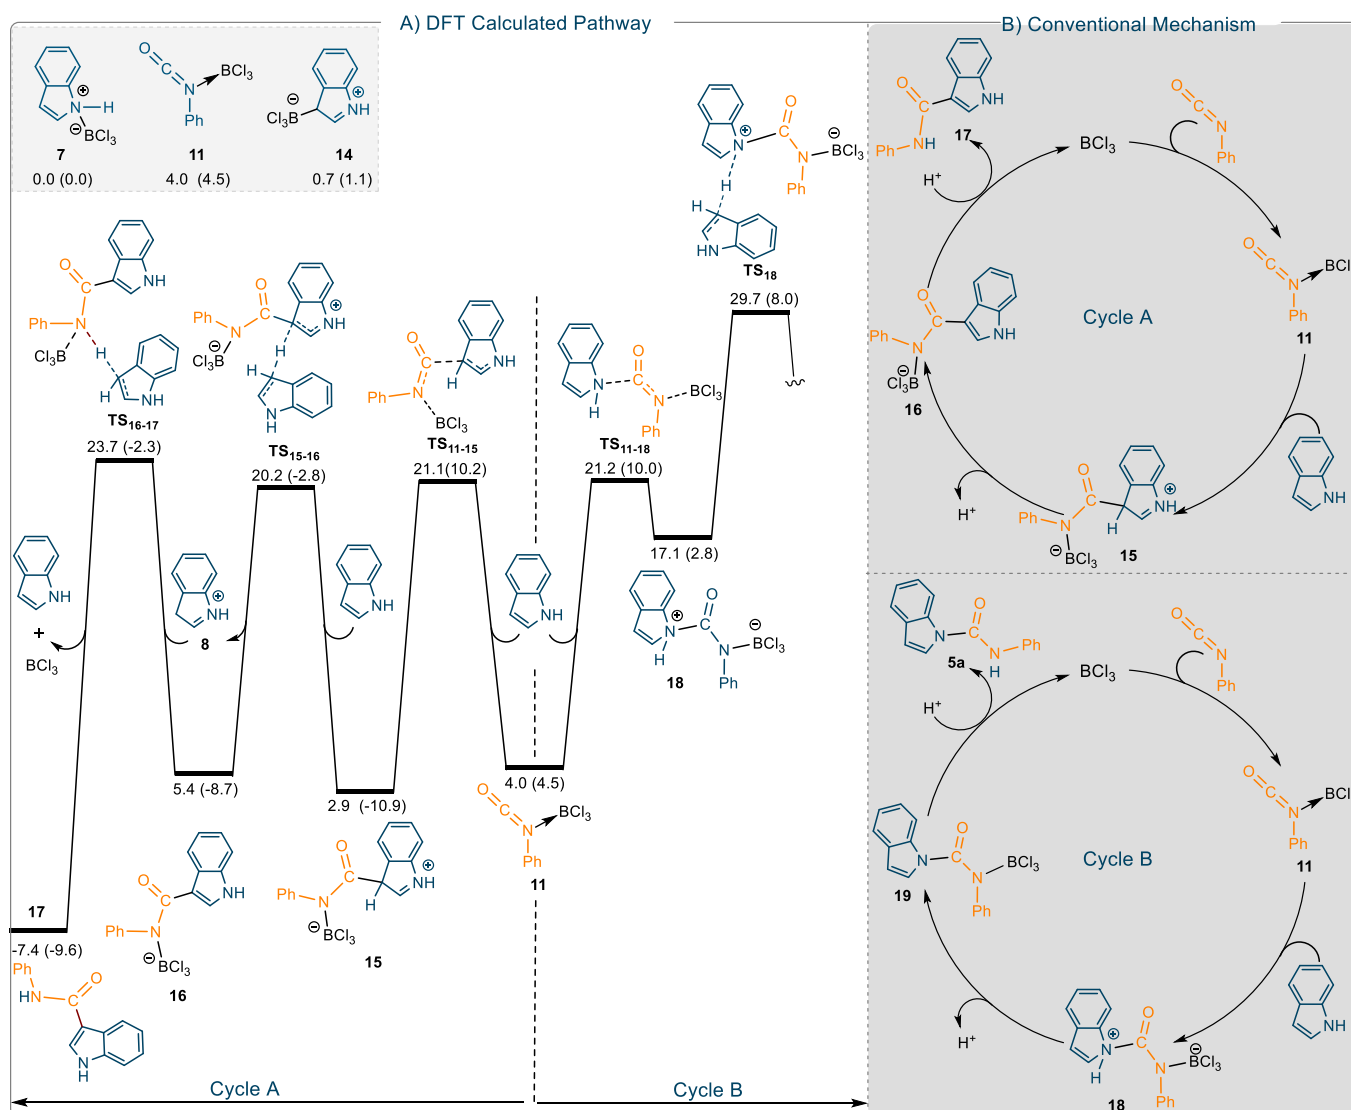

Figure S134. DFT calculated reaction pathway at the SMD/M06-2X-D3/def2-TZVP//SMD/M06-2X/6-31G(d) level of theory in CH<sub>2</sub>Cl<sub>2</sub> for the amidation of 1*H*-indole using phenyl isocyanate and BCl<sub>3</sub> as a catalyst. Free energies (potential energies) are given in kcal/mol (A). DFT proposed catalytic cycle for the C3 amidation and *N*-carboxamidation of 1*H*-indole with phenyl isocyanate and catalytic BCl<sub>3</sub> (B).

## 5.2 Cartesian Coordinates and Total Energies for the Calculated Structures

Total potential (E), enthalpy (H) and Gibbs free energies (G) of all structures optimized at the SMD/M06-2X/BS1 level of theory along with the total potential energies calculated by SMD/ M06-2X/BS2//SMD/M06-2X/BS1 and cartesian coordinates for all of the calculated structures.

BCl3

E (SMD/M06-2X/BS1) = -1405.4610358 au

G (SMD/M06-2X/BS1) = -1405.480883 au

E (SMD/M06-2X/BS2//SMD/M06-2X/BS1) = -1405.57478984 au

|    |             |             |            |
|----|-------------|-------------|------------|
| B  | 0.00000000  | 0.00000000  | 0.00000000 |
| Cl | 0.00000000  | 1.74493100  | 0.00000000 |
| Cl | -1.51115400 | -0.87246500 | 0.00000000 |
| Cl | 1.51115400  | -0.87246500 | 0.00000000 |

phenyl isocyanate

E (SMD/M06-2X/BS1) = -399.573059777 au

G (SMD/M06-2X/BS1) = -399.50079 au

E (SMD/M06-2X/BS2//SMD/M06-2X/BS1) = -399.731207695 au

|   |             |             |             |
|---|-------------|-------------|-------------|
| C | 2.53077800  | -0.07655500 | -0.00010600 |
| O | 3.64198800  | 0.30079900  | -0.00093300 |
| N | 1.44573300  | -0.59461800 | 0.00103100  |
| C | 0.08652000  | -0.25808400 | 0.00047800  |
| C | -0.84931800 | -1.29255900 | 0.00008900  |
| C | -0.32905100 | 1.07647100  | 0.00056700  |
| C | -2.20716000 | -0.98710900 | -0.00042500 |
| H | -0.50290700 | -2.32082900 | 0.00017300  |
| C | -1.68863400 | 1.36790300  | 0.00002600  |
| H | 0.41323900  | 1.86909200  | 0.00111700  |
| C | -2.63134600 | 0.34020900  | -0.00051800 |
| H | -2.93503100 | -1.79253500 | -0.00076700 |
| H | -2.01085400 | 2.40459200  | 0.00002900  |
| H | -3.69120700 | 0.57395000  | -0.00097100 |

1H-Indole

E (SMD/M06-2X/BS1) = -363.676769872 au

G (SMD/M06-2X/BS1) = -363.575437 au

E (SMD/M06-2X/BS2//SMD/M06-2X/BS1) = -363.814825175 au

|   |             |             |             |
|---|-------------|-------------|-------------|
| C | -0.24969900 | 0.75173700  | -0.00000100 |
| C | -0.25014000 | -0.66738700 | 0.00000000  |
| C | 0.93219500  | -1.41775900 | -0.00000100 |
| C | 2.12867300  | -0.72101600 | -0.00000100 |
| C | 2.15500200  | 0.68998600  | 0.00000200  |
| C | 0.98384700  | 1.42775800  | 0.00000000  |

|   |             |             |             |
|---|-------------|-------------|-------------|
| C | -1.62501200 | 1.16681200  | -0.00000100 |
| C | -2.38155600 | 0.02666300  | -0.00000100 |
| H | 0.90638700  | -2.50341800 | -0.00000300 |
| H | 3.06522400  | -1.27052400 | -0.00000300 |
| H | 3.11302200  | 1.20114400  | 0.00000500  |
| H | 1.01312300  | 2.51401400  | 0.00000300  |
| H | -1.99980700 | 2.18074800  | -0.00000200 |
| H | -3.45537800 | -0.09781500 | -0.00000100 |
| N | -1.56096100 | -1.07550200 | 0.00000200  |
| H | -1.87570400 | -2.03640600 | 0.00000400  |

### 5a·BCl<sub>3</sub>

E (SMD/M06-2X/BS1) = -2168.78558766 au

G (SMD/M06-2X/BS1) = -2168.584412 au

E (SMD/M06-2X/BS2//SMD/M06-2X/BS1) = -2169.18159618 au

|   |             |             |             |
|---|-------------|-------------|-------------|
| C | 3.46377300  | -1.46295300 | 0.17582900  |
| C | 2.43341900  | -0.64040900 | -0.31344800 |
| C | 2.67258000  | 0.41527100  | -1.19110700 |
| C | 3.99433100  | 0.64245500  | -1.55369800 |
| C | 5.04130000  | -0.15348600 | -1.06216100 |
| C | 4.78750100  | -1.20920000 | -0.19954900 |
| C | 2.85866600  | -2.47849600 | 1.01203200  |
| C | 1.52467400  | -2.28410200 | 1.00185500  |
| H | 1.87485400  | 1.04288600  | -1.56869900 |
| H | 4.21824200  | 1.46167800  | -2.22937200 |
| H | 6.06099600  | 0.06121800  | -1.36564800 |
| H | 5.59210100  | -1.83453700 | 0.17472700  |
| H | 0.73937100  | -2.79356000 | 1.54228200  |
| N | 1.22161600  | -1.15587500 | 0.20899500  |
| C | -0.02755200 | -0.73257100 | -0.11932800 |
| O | -0.20860500 | 0.49449200  | -0.49034700 |
| N | -1.02787400 | -1.58959300 | -0.12342700 |
| H | -0.80719700 | -2.56637800 | 0.06091500  |
| C | -2.41236500 | -1.31389100 | -0.36763600 |
| C | -3.33567900 | -2.04325100 | 0.37768700  |
| C | -2.82207800 | -0.39943300 | -1.33592200 |
| C | -4.69485200 | -1.83806000 | 0.16592400  |
| H | -2.98774500 | -2.75316500 | 1.12263400  |
| C | -4.18555000 | -0.19975500 | -1.52999100 |
| H | -2.09601700 | 0.14659200  | -1.92557800 |
| C | -5.12207900 | -0.91145900 | -0.78289500 |
| H | -5.41776100 | -2.40023900 | 0.74811700  |
| H | -4.51363800 | 0.51526600  | -2.27746700 |
| H | -6.18282200 | -0.74732500 | -0.94339200 |

|    |             |             |             |
|----|-------------|-------------|-------------|
| H  | 3.37889900  | -3.24622700 | 1.56785000  |
| B  | -0.36905200 | 1.65690700  | 0.44455400  |
| Cl | -1.75958300 | 1.29291500  | 1.62949300  |
| Cl | -0.76544000 | 3.08472100  | -0.65551900 |
| Cl | 1.18632300  | 1.96046000  | 1.41009100  |

### 5a

E (SMD/M06-2X/BS1) = -763.287676171 au

G (SMD/M06-2X/BS1) = -763.088521 au

E (SMD/M06-2X/BS2//SMD/M06-2X/BS1) = -763.576904733 au

|   |             |             |             |
|---|-------------|-------------|-------------|
| C | -3.24104700 | 0.86936900  | -0.11672600 |
| C | -2.26574700 | -0.14639500 | -0.00354600 |
| C | -2.60700400 | -1.47185000 | 0.28518700  |
| C | -3.95476400 | -1.75777600 | 0.45042700  |
| C | -4.94143000 | -0.76188800 | 0.33441000  |
| C | -4.59570400 | 0.54983100  | 0.05334600  |
| C | -2.54676800 | 2.09969900  | -0.40505700 |
| C | -1.22173700 | 1.81562600  | -0.44602300 |
| H | -1.85092700 | -2.24139100 | 0.36695200  |
| H | -4.25230500 | -2.77822800 | 0.67189600  |
| H | -5.98543000 | -1.02807900 | 0.46831400  |
| H | -5.35480000 | 1.32184200  | -0.03325500 |
| H | -0.38845700 | 2.46156600  | -0.68367800 |
| N | -1.01878600 | 0.45558600  | -0.19603700 |
| C | 0.21018900  | -0.23229500 | -0.16643400 |
| O | 0.26243300  | -1.43720100 | -0.32451300 |
| N | 1.28156600  | 0.58304000  | 0.05494000  |
| H | 1.09503500  | 1.50824700  | 0.42364300  |
| C | 2.63948300  | 0.20310300  | 0.05892500  |
| C | 3.54333300  | 1.09614800  | 0.64698100  |
| C | 3.11103600  | -0.97952100 | -0.52091600 |
| C | 4.90271500  | 0.80993700  | 0.66055000  |
| H | 3.17116700  | 2.01479800  | 1.09385800  |
| C | 4.47689100  | -1.25293100 | -0.49554300 |
| H | 2.42185700  | -1.67444300 | -0.98005300 |
| C | 5.37935500  | -0.36945300 | 0.09065000  |
| H | 5.58975200  | 1.51336100  | 1.12108500  |
| H | 4.83416900  | -2.17373700 | -0.94697700 |
| H | 6.44069000  | -0.59569500 | 0.10312400  |
| H | -2.99247800 | 3.06935800  | -0.57850400 |

### 7

E (SMD/M06-2X/BS1) = -1769.16673172 au

G (SMD/M06-2X/BS1) = -1769.063037 au

E (SMD/M06-2X/BS2//SMD/M06-2X/BS1) = -1769.41132742 au

|    |             |             |             |
|----|-------------|-------------|-------------|
| C  | 1.90574200  | 1.01755300  | -0.12366300 |
| C  | 1.11232500  | -0.07341800 | -0.48556700 |
| C  | 1.59185300  | -1.37018400 | -0.52467300 |
| C  | 2.92419700  | -1.55766400 | -0.15001000 |
| C  | 3.72877900  | -0.48394400 | 0.23899500  |
| C  | 3.23120400  | 0.81695400  | 0.25156000  |
| C  | 1.09981500  | 2.22518500  | -0.27477600 |
| C  | -0.11538600 | 1.88226600  | -0.70240900 |
| H  | 0.97734400  | -2.20583300 | -0.83364800 |
| H  | 3.33739000  | -2.56077800 | -0.16536500 |
| H  | 4.75955900  | -0.66633700 | 0.52555000  |
| H  | 3.85794500  | 1.65580600  | 0.53620500  |
| H  | 1.43549300  | 3.23647100  | -0.08588900 |
| H  | -0.98401700 | 2.47807500  | -0.93639000 |
| N  | -0.23415800 | 0.41791900  | -0.82012500 |
| H  | -0.46010400 | 0.17567200  | -1.79737900 |
| B  | -1.46680800 | -0.17354300 | 0.08510600  |
| Cl | -1.06577000 | 0.13772800  | 1.84702400  |
| Cl | -2.99310800 | 0.72129100  | -0.45644600 |
| Cl | -1.63651300 | -1.97144700 | -0.29084200 |

**8**

E (SMD/M06-2X/BS1) = -364.104913286 au

G (SMD/M06-2X/BS1) = -363.991370 au

E (SMD/M06-2X/BS2//SMD/M06-2X/BS1) = -364.237747309 au

|   |             |             |             |
|---|-------------|-------------|-------------|
| H | 1.93174700  | 1.75946000  | 0.88044000  |
| C | 0.20544300  | 0.73208100  | 0.00005000  |
| C | 0.17894800  | -0.66263200 | 0.00016200  |
| C | -0.97871300 | -1.42184600 | 0.00037500  |
| C | -2.17464000 | -0.70647400 | 0.00002900  |
| C | -2.18078200 | 0.69263100  | -0.00008100 |
| C | -0.99430900 | 1.42851800  | -0.00016200 |
| C | 1.64280900  | 1.17041200  | 0.00024700  |
| C | 2.36738000  | -0.12526300 | 0.00006400  |
| H | -0.95308800 | -2.50617700 | 0.00020300  |
| H | -3.11564400 | -1.24607500 | -0.00011400 |
| H | -3.13038000 | 1.21764700  | -0.00017400 |
| H | -1.01095200 | 2.51351400  | -0.00026200 |
| H | 1.93123400  | 1.76001000  | -0.88035500 |
| H | 3.43787400  | -0.29195200 | 0.00073700  |
| N | 1.52989100  | -1.10831300 | -0.00058400 |
| H | 1.80315100  | -2.09280100 | -0.00049300 |

**9**

E (SMD/M06-2X/BS1) = -1768.74038238 au  
 G (SMD/M06-2X/BS1) = -1768.649892 au  
 E (SMD/M06-2X/BS2//SMD/M06-2X/BS1) = -1768.98654441 au  
 C 2.11114100 1.05893500 -0.00274800  
 C 1.11944000 0.04320100 -0.00579300  
 C 1.46835200 -1.31526400 -0.00352400  
 C 2.81628500 -1.63891300 -0.00094100  
 C 3.81160900 -0.64119800 0.00048500  
 C 3.46993000 0.70066000 0.00009500  
 C 1.41094800 2.31070500 -0.00298700  
 C 0.07858900 2.01097900 -0.00625700  
 H 0.70884100 -2.08941300 -0.00390000  
 H 3.11012400 -2.68455300 0.00010200  
 H 4.85805500 -0.93239700 0.00235500  
 H 4.23841900 1.46935600 0.00216300  
 H 1.84260500 3.30227600 -0.00107500  
 H -0.76804800 2.68132500 -0.00681900  
 N -0.13025400 0.64439700 -0.00929300  
 B -1.45519000 -0.08543400 -0.00077300  
 Cl -1.60407600 -1.15822300 1.54572800  
 Cl -2.88158600 1.12670400 -0.02022700  
 Cl -1.60375200 -1.20406000 -1.51337700

### 10·BCl<sub>3</sub>

E (SMD/M06-2X/BS1) = -1769.18619985 au  
 G (SMD/M06-2X/BS1) = -1769.083648 au  
 E (SMD/M06-2X/BS2//SMD/M06-2X/BS1) = -1769.42770120 au  
 C 2.11089300 1.01412900 0.00004600  
 C 1.13375200 0.01794900 0.00000900  
 C 1.44052200 -1.33627900 -0.00005800  
 C 2.79385500 -1.66995200 -0.00002500  
 C 3.78622200 -0.68590700 0.00007100  
 C 3.45451000 0.66864800 0.00009000  
 C 1.41706400 2.34119900 -0.00004200  
 C -0.00995800 1.93525200 -0.00014100  
 H 0.67535200 -2.10283400 -0.00014500  
 H 3.07733700 -2.71726400 -0.00007700  
 H 4.83053100 -0.98123800 0.00011500  
 H 4.22527900 1.43287200 0.00012500  
 H 1.63221100 2.95996800 -0.88107000  
 H -0.86148300 2.60440500 -0.00026200  
 N -0.16156000 0.65056300 -0.00007400  
 H 1.63198000 2.95993300 0.88107700  
 B -1.52989700 -0.13562400 -0.00003900

|    |             |             |             |
|----|-------------|-------------|-------------|
| Cl | -2.93623400 | 1.06585100  | 0.00041800  |
| Cl | -1.56679400 | -1.17263900 | 1.53417900  |
| Cl | -1.56708800 | -1.17214700 | -1.53452400 |

## 10

E (SMD/M06-2X/BS1) = -363.660971275 au

G (SMD/M06-2X/BS1) = -363.560821 au

E (SMD/M06-2X/BS2//SMD/M06-2X/BS1) = -363.795130470 au

|   |             |             |             |
|---|-------------|-------------|-------------|
| C | -0.24541500 | 0.70909200  | 0.00003200  |
| C | -0.23027900 | -0.69348300 | -0.00004500 |
| C | 0.95865800  | -1.41175500 | -0.00004600 |
| C | 2.15297300  | -0.68936200 | 0.00003100  |
| C | 2.14662400  | 0.70788700  | 0.00010800  |
| C | 0.94418100  | 1.42192600  | 0.00010900  |
| C | -1.68955500 | 1.11996100  | 0.00001000  |
| C | -2.35052600 | -0.23414800 | -0.00009000 |
| H | 0.95032500  | -2.49744800 | -0.00010700 |
| H | 3.10026200  | -1.22008000 | 0.00003200  |
| H | 3.08916200  | 1.24695900  | 0.00016800  |
| H | 0.94834400  | 2.50835100  | 0.00016800  |
| H | -1.97989300 | 1.70411200  | -0.88199400 |
| H | -3.42833200 | -0.37729500 | -0.00013600 |
| N | -1.54569900 | -1.23561300 | -0.00012400 |
| H | -1.97994200 | 1.70398600  | 0.88208200  |

## 10'

E (SMD/M06-2X/BS1) = -2168.72782513 au

G (SMD/M06-2X/BS1) = -2168.533642 au

E (SMD/M06-2X/BS2//SMD/M06-2X/BS1) = -2169.12427751 au

|   |             |             |             |
|---|-------------|-------------|-------------|
| C | -1.05853000 | 0.00482300  | 1.74366800  |
| O | -1.04434600 | -0.19279400 | 2.86959600  |
| N | -1.19209400 | 0.20492600  | 0.50479100  |
| C | -0.45649500 | 1.32480200  | -0.08644000 |
| C | -0.67304300 | 2.59903200  | 0.42349400  |
| C | 0.43804200  | 1.07608500  | -1.12030700 |
| C | 0.04992500  | 3.66246000  | -0.11070400 |
| H | -1.39328300 | 2.75132000  | 1.22228900  |
| C | 1.14469700  | 2.15294200  | -1.64951100 |
| H | 0.59540400  | 0.06749300  | -1.48400400 |
| C | 0.95812400  | 3.43935100  | -1.14356000 |
| H | -0.10271600 | 4.66304100  | 0.28013100  |
| H | 1.85208000  | 1.97867800  | -2.45412900 |
| H | 1.51971800  | 4.27017700  | -1.55873500 |
| B | -2.39079400 | -0.56597700 | -0.28055600 |

|    |             |             |             |
|----|-------------|-------------|-------------|
| Cl | -3.55805300 | 0.73769600  | -0.83977200 |
| Cl | -1.66050300 | -1.48895400 | -1.68834700 |
| Cl | -3.16754300 | -1.71591200 | 0.93966300  |
| C  | 3.29941400  | -0.48446000 | 0.10880900  |
| C  | 2.11025400  | -0.88524300 | 0.73413000  |
| C  | 1.47618800  | -2.07914300 | 0.41587400  |
| C  | 2.06402200  | -2.88049300 | -0.56461100 |
| C  | 3.24770800  | -2.48904800 | -1.19554300 |
| C  | 3.87937600  | -1.28592900 | -0.86306200 |
| C  | 3.65865200  | 0.85244600  | 0.69001900  |
| C  | 2.50610900  | 1.05226800  | 1.63781900  |
| H  | 0.55415900  | -2.37403900 | 0.91051200  |
| H  | 1.59244400  | -3.81794000 | -0.84334100 |
| H  | 3.68317000  | -3.12861200 | -1.95721400 |
| H  | 4.79772200  | -0.98978300 | -1.36205600 |
| H  | 3.69288600  | 1.65883200  | -0.05375200 |
| H  | 2.37433500  | 1.93888100  | 2.25320000  |
| N  | 1.65214500  | 0.09160900  | 1.66049200  |
| H  | 4.61947200  | 0.86096100  | 1.21943900  |

## 11

E (SMD/M06-2X/BS1) = -1805.05429067 au

G (SMD/M06-2X/BS1) = -1804.980448 au

E (SMD/M06-2X/BS2//SMD/M06-2X/BS1) = -1805.32100188 au

|    |             |             |             |
|----|-------------|-------------|-------------|
| C  | 0.49460200  | 1.91746800  | 0.05078300  |
| O  | 0.74279900  | 3.03433800  | 0.07411200  |
| N  | 0.20359400  | 0.69659300  | 0.02581100  |
| C  | -1.22998500 | 0.36982500  | 0.01588900  |
| C  | -1.87150700 | 0.15907400  | 1.22959600  |
| C  | -1.87632900 | 0.26515300  | -1.20929200 |
| C  | -3.22145400 | -0.18167700 | 1.20650200  |
| H  | -1.32650000 | 0.25973600  | 2.16204400  |
| C  | -3.22627500 | -0.07515500 | -1.21149000 |
| H  | -1.33381900 | 0.44603700  | -2.13122800 |
| C  | -3.89410400 | -0.29953400 | -0.00858600 |
| H  | -3.74478600 | -0.35252900 | 2.14131900  |
| H  | -3.75332400 | -0.16312700 | -2.15564900 |
| H  | -4.94641400 | -0.56493800 | -0.01821600 |
| B  | 1.37426100  | -0.42513200 | -0.01101300 |
| Cl | 1.15682200  | -1.47621500 | 1.47470700  |
| Cl | 2.96377200  | 0.51699100  | 0.02555300  |
| Cl | 1.16271800  | -1.36908700 | -1.56832900 |



**12**

E (SMD/M06-2X/BS1) = -2168.76296011 au

G (SMD/M06-2X/BS1) = -2168.563514 au

E (SMD/M06-2X/BS2//SMD/M06-2X/BS1) = -2169.15625420 au

|    |             |             |             |
|----|-------------|-------------|-------------|
| C  | 0.33971100  | -1.19603400 | -0.73456600 |
| O  | 0.74751700  | -2.26809300 | -1.09399700 |
| N  | 0.97428100  | -0.17983600 | -0.12536600 |
| C  | 0.37028400  | 1.12988200  | -0.12859400 |
| C  | 0.22090400  | 1.81066900  | -1.33578300 |
| C  | -0.05040100 | 1.71080200  | 1.06654500  |
| C  | -0.37398700 | 3.07035400  | -1.35003700 |
| H  | 0.57513100  | 1.35100700  | -2.25506000 |
| C  | -0.63653200 | 2.97281600  | 1.04748200  |
| H  | 0.08897000  | 1.17462400  | 1.99995900  |
| C  | -0.80398200 | 3.65145800  | -0.15918500 |
| H  | -0.49216600 | 3.59836400  | -2.29110900 |
| H  | -0.96434200 | 3.42544600  | 1.97797900  |
| H  | -1.26419700 | 4.63462300  | -0.16955400 |
| B  | 2.47400900  | -0.38734600 | 0.24164200  |
| Cl | 3.47789700  | -0.62047800 | -1.32595100 |
| Cl | 3.12439300  | 1.10729200  | 1.14113200  |
| Cl | 2.64761100  | -1.87777400 | 1.35580200  |
| C  | -3.34581500 | -0.67746200 | -0.52376900 |
| C  | -2.10322900 | -0.84609800 | 0.08409900  |
| C  | -1.91027500 | -0.94058400 | 1.45244500  |
| C  | -3.05696300 | -0.83512700 | 2.23666700  |
| C  | -4.31642200 | -0.64884100 | 1.65651700  |
| C  | -4.47756900 | -0.57175600 | 0.27238900  |
| C  | -3.14136000 | -0.67328800 | -2.01121900 |
| C  | -1.67470000 | -0.87099100 | -2.12499800 |
| H  | -0.92754600 | -1.09224200 | 1.88784000  |
| H  | -2.96814400 | -0.90129500 | 3.31574900  |
| H  | -5.18815600 | -0.57021000 | 2.29797200  |
| H  | -5.46013800 | -0.43898100 | -0.16844300 |
| H  | -3.42316100 | 0.26937200  | -2.50032800 |
| H  | -1.08223800 | -0.94230400 | -3.03113900 |
| N  | -1.12518700 | -0.93739400 | -0.95683300 |
| H  | -3.67414600 | -1.47479900 | -2.53937700 |

**12'**

E (SMD/M06-2X/BS1) = -2397.93855741 au

G (SMD/M06-2X/BS1) = -2397.678588 au

E (SMD/M06-2X/BS2//SMD/M06-2X/BS1) = -2398.47320820 au

|   |             |             |            |
|---|-------------|-------------|------------|
| C | -0.15843900 | -0.55838100 | 0.11006500 |
|---|-------------|-------------|------------|

|    |             |             |             |
|----|-------------|-------------|-------------|
| O  | 0.14773200  | -1.67870600 | 0.54514600  |
| N  | -1.43221800 | -0.17375200 | -0.09600400 |
| C  | -1.74905400 | 1.23307100  | -0.03892100 |
| C  | -1.51359100 | 1.93474900  | 1.14156800  |
| C  | -2.28749800 | 1.88220300  | -1.14926400 |
| C  | -1.80499600 | 3.29605000  | 1.20584400  |
| H  | -1.10020800 | 1.41440300  | 2.00135300  |
| C  | -2.58415100 | 3.23916300  | -1.07665400 |
| H  | -2.46425600 | 1.31975800  | -2.06084700 |
| C  | -2.34142300 | 3.94925900  | 0.09932700  |
| H  | -1.61555900 | 3.84171000  | 2.12498400  |
| H  | -3.00248000 | 3.74334900  | -1.94229600 |
| H  | -2.57101700 | 5.00904900  | 0.15150600  |
| B  | -2.55758400 | -1.23995300 | 0.06110200  |
| Cl | -2.69844900 | -1.75894900 | 1.85975100  |
| Cl | -4.20297300 | -0.53135800 | -0.46141900 |
| Cl | -2.20509400 | -2.72220600 | -1.02811600 |
| C  | 2.89079300  | 1.38330800  | -0.09681700 |
| C  | 2.07724900  | 0.42432800  | 0.54270400  |
| C  | 2.47757800  | -0.23346000 | 1.71029500  |
| C  | 3.73599000  | 0.07202100  | 2.20671500  |
| C  | 4.57178100  | 1.00803200  | 1.57166600  |
| C  | 4.15866600  | 1.67079000  | 0.42772000  |
| C  | 2.14785500  | 1.88366600  | -1.22983500 |
| C  | 0.94630400  | 1.24586700  | -1.24294100 |
| H  | 1.83416200  | -0.94626300 | 2.21396600  |
| H  | 4.07890000  | -0.42216300 | 3.11043200  |
| H  | 5.54995400  | 1.21874200  | 1.99275700  |
| H  | 4.79606500  | 2.40726400  | -0.05276100 |
| H  | 2.66343700  | 0.23978100  | -2.69146600 |
| H  | 0.12653400  | 1.32098800  | -1.94151500 |
| N  | 0.87678700  | 0.35382600  | -0.17413400 |
| H  | 2.47273700  | 2.63307200  | -1.93945700 |
| O  | 3.19463500  | -0.53121100 | -2.96525200 |
| H  | 3.87166200  | -0.17285800 | -3.56388300 |
| H  | 3.83258900  | -1.20056000 | -1.63955400 |
| O  | 4.13107300  | -1.66942800 | -0.80116400 |
| H  | 3.13512400  | -2.33768700 | -0.27637500 |
| H  | 4.86343200  | -2.26181400 | -1.04991500 |
| O  | 2.29277700  | -2.90103000 | 0.19633700  |
| H  | 2.05438600  | -3.67339100 | -0.35374500 |
| H  | 1.42910900  | -2.32241300 | 0.31923300  |

**13**

E (SMD/M06-2X/BS1) = -2168.76817347 au

G (SMD/M06-2X/BS1) = -2168.565459 au

E (SMD/M06-2X/BS2//SMD/M06-2X/BS1) = -2169.16392264 au

|    |             |             |             |
|----|-------------|-------------|-------------|
| C  | -3.68606700 | -0.17468600 | -0.97368600 |
| C  | -2.80081100 | -0.36533900 | 0.10332000  |
| C  | -3.24250000 | -0.74543800 | 1.37002600  |
| C  | -4.61226200 | -0.92941900 | 1.52912200  |
| C  | -5.51079200 | -0.74181000 | 0.46897100  |
| C  | -5.05808200 | -0.36430200 | -0.78755700 |
| C  | -2.89685900 | 0.20409200  | -2.12581000 |
| C  | -1.60333400 | 0.23491300  | -1.75115100 |
| H  | -2.55916600 | -0.89145800 | 2.19463000  |
| H  | -4.98995800 | -1.22574500 | 2.50259600  |
| H  | -6.57232300 | -0.89483700 | 0.63595700  |
| H  | -5.74856200 | -0.21787800 | -1.61236200 |
| H  | -0.74204900 | 0.48780000  | -2.35232700 |
| N  | -1.49521900 | -0.11095200 | -0.38351600 |
| C  | -0.38487000 | -0.17869100 | 0.41149100  |
| O  | -0.37980600 | -0.44609500 | 1.57997500  |
| N  | 0.90806500  | 0.10500100  | -0.27505800 |
| C  | 1.83216500  | -1.05557800 | -0.21346700 |
| C  | 2.29895500  | -1.54782100 | -1.42772800 |
| C  | 2.22048100  | -1.61224800 | 0.99993400  |
| C  | 3.18099400  | -2.62327700 | -1.42990400 |
| H  | 1.98240100  | -1.09670400 | -2.36384200 |
| C  | 3.09966800  | -2.69323200 | 0.97914500  |
| H  | 1.84299900  | -1.22479000 | 1.93632400  |
| C  | 3.58205800  | -3.19719700 | -0.22602500 |
| H  | 3.54928600  | -3.00874600 | -2.37477300 |
| H  | 3.40739100  | -3.13951900 | 1.91901300  |
| H  | 4.26861700  | -4.03773600 | -0.22760700 |
| H  | -3.26871000 | 0.42811700  | -3.11593200 |
| H  | 0.72802800  | 0.24368300  | -1.27373000 |
| B  | 1.55365400  | 1.57425400  | 0.17066700  |
| Cl | 2.08533200  | 1.54940600  | 1.91288100  |
| Cl | 2.95839500  | 1.84221000  | -0.98689800 |
| Cl | 0.18979300  | 2.78821700  | -0.12075600 |

**14**

E (SMD/M06-2X/BS1) = -1769.16605901 au

G (SMD/M06-2X/BS1) = -1769.063062 au

E (SMD/M06-2X/BS2//SMD/M06-2X/BS1) = -1769.40950483 au

|   |             |            |             |
|---|-------------|------------|-------------|
| C | -1.11243700 | 0.15119500 | -0.61622300 |
|---|-------------|------------|-------------|

|    |             |             |             |
|----|-------------|-------------|-------------|
| C  | -1.85794100 | -0.93738400 | -0.15411300 |
| C  | -3.15540200 | -0.84978600 | 0.32702500  |
| C  | -3.72427300 | 0.42023100  | 0.32452300  |
| C  | -3.00853100 | 1.53008900  | -0.14212400 |
| C  | -1.70106600 | 1.41224800  | -0.61126400 |
| C  | 0.24852500  | -0.34617400 | -0.98729300 |
| C  | 0.11202600  | -1.79229400 | -0.80849500 |
| H  | -3.69307800 | -1.72296000 | 0.68089700  |
| H  | -4.73869000 | 0.55032500  | 0.68683400  |
| H  | -3.48336900 | 2.50604600  | -0.13647700 |
| H  | -1.15773700 | 2.28155100  | -0.96465800 |
| H  | 0.61428800  | -0.07247800 | -1.98226700 |
| H  | 0.85515300  | -2.55903400 | -0.99198500 |
| N  | -1.04663600 | -2.08735300 | -0.29763800 |
| H  | -1.33237400 | -3.02802900 | -0.02717400 |
| B  | 1.47016400  | 0.17293900  | 0.04503000  |
| Cl | 1.64342200  | 2.01763100  | -0.12141700 |
| Cl | 3.06381900  | -0.66008000 | -0.47638700 |
| Cl | 1.06370200  | -0.28327900 | 1.80962300  |

## 15

E (SMD/M06-2X/BS1) = -2168.76410526 au

G (SMD/M06-2X/BS1) = -2168.562723 au

E (SMD/M06-2X/BS2//SMD/M06-2X/BS1) = -2169.16008849 au

|    |             |             |             |
|----|-------------|-------------|-------------|
| C  | 0.21690000  | 0.47507600  | -0.58684500 |
| O  | 0.38479400  | 1.63099800  | -0.94694700 |
| N  | -0.95973700 | -0.02916100 | -0.13258700 |
| C  | -2.01834900 | 0.95035700  | -0.07500800 |
| C  | -2.22455200 | 1.66847900  | 1.09882800  |
| C  | -2.82319800 | 1.16722800  | -1.18989100 |
| C  | -3.25409500 | 2.60471100  | 1.16049400  |
| H  | -1.58396400 | 1.48071100  | 1.95607900  |
| C  | -3.85090500 | 2.10443800  | -1.12431700 |
| H  | -2.64446600 | 0.59328000  | -2.09491800 |
| C  | -4.06828600 | 2.82327000  | 0.05048200  |
| H  | -3.42047500 | 3.16228300  | 2.07724800  |
| H  | -4.48330700 | 2.27179500  | -1.99097500 |
| H  | -4.87160200 | 3.55204100  | 0.10082700  |
| B  | -1.24472200 | -1.49273800 | 0.22545500  |
| Cl | -0.13716600 | -2.06748700 | 1.64762900  |
| Cl | -3.01035800 | -1.72819500 | 0.74251800  |
| Cl | -0.91781000 | -2.60539800 | -1.27750600 |
| C  | 2.59968800  | 0.10013100  | 0.17472800  |
| C  | 3.63745700  | 0.45057100  | -0.68655500 |

|   |            |             |             |
|---|------------|-------------|-------------|
| C | 4.84190100 | 0.99146000  | -0.27424200 |
| C | 4.98142600 | 1.18957400  | 1.09910200  |
| C | 3.95382000 | 0.85491200  | 1.98610500  |
| C | 2.74926100 | 0.30744700  | 1.53706400  |
| C | 1.46335000 | -0.44825500 | -0.65243200 |
| C | 2.02212400 | -0.35715500 | -2.03154200 |
| H | 5.62662300 | 1.24691500  | -0.97786200 |
| H | 5.90351800 | 1.61281400  | 1.48297400  |
| H | 4.09466300 | 1.02602000  | 3.04838700  |
| H | 1.95397800 | 0.05476500  | 2.23069100  |
| H | 1.24685100 | -1.49589000 | -0.42631200 |
| H | 1.53651500 | -0.64738700 | -2.95664800 |
| N | 3.21071000 | 0.14136600  | -2.00887100 |
| H | 3.78152200 | 0.29780300  | -2.84170100 |

## 16

E (SMD/M06-2X/BS1) = -2168.33243985 au

G (SMD/M06-2X/BS1) = -2168.144391 au

E (SMD/M06-2X/BS2//SMD/M06-2X/BS1) = -2168.73204641 au

|    |             |             |             |
|----|-------------|-------------|-------------|
| C  | 0.22371900  | -0.80598300 | 0.00898000  |
| O  | 0.23135500  | -2.01922700 | 0.20415600  |
| N  | -0.96612600 | -0.08115700 | 0.04207400  |
| C  | -2.13438600 | -0.89962600 | -0.16103400 |
| C  | -2.79239500 | -0.85046500 | -1.38730000 |
| C  | -2.61094300 | -1.73577100 | 0.84988600  |
| C  | -3.93487600 | -1.62327700 | -1.59939800 |
| H  | -2.40669200 | -0.20175200 | -2.16777700 |
| C  | -3.74505400 | -2.51062400 | 0.63424900  |
| H  | -2.08768200 | -1.76353200 | 1.80020900  |
| C  | -4.41301800 | -2.45433700 | -0.59072500 |
| H  | -4.44610900 | -1.57552200 | -2.55649600 |
| H  | -4.11252100 | -3.15846400 | 1.42488900  |
| H  | -5.30113700 | -3.05744100 | -0.75505200 |
| B  | -1.20382800 | 1.37818400  | 0.38161800  |
| Cl | -1.43116600 | 2.45559700  | -1.18764300 |
| Cl | -2.80887800 | 1.57164700  | 1.36672600  |
| Cl | 0.14836900  | 2.13863700  | 1.43387000  |
| C  | 2.79680100  | -0.65554100 | -0.02090700 |
| C  | 3.73781400  | 0.20749900  | -0.63048900 |
| C  | 5.11889800  | 0.02480700  | -0.50898900 |
| C  | 5.55162000  | -1.05399900 | 0.24497600  |
| C  | 4.63289900  | -1.92892100 | 0.86052100  |
| C  | 3.26566400  | -1.74341200 | 0.73477600  |
| C  | 1.48848100  | -0.14245700 | -0.35112400 |

|   |            |             |             |
|---|------------|-------------|-------------|
| C | 1.69084000 | 0.96162900  | -1.14564300 |
| H | 5.81856000 | 0.70361700  | -0.98736500 |
| H | 6.61673900 | -1.22982800 | 0.36247100  |
| H | 5.00848800 | -2.76603000 | 1.44165400  |
| H | 2.55917800 | -2.42218200 | 1.20004500  |
| H | 0.96861700 | 1.61792400  | -1.61006800 |
| N | 3.02659100 | 1.17227300  | -1.31091600 |
| H | 3.42968700 | 1.92118900  | -1.85882800 |

## 17

E (SMD/M06-2X/BS1) = -763.291664655 au

G (SMD/M06-2X/BS1) = -763.092760 au

E (SMD/M06-2X/BS2//SMD/M06-2X/BS1) = -763.582422909 au

|   |             |             |             |
|---|-------------|-------------|-------------|
| C | 2.30629900  | -0.19095800 | -0.00987900 |
| C | 3.27845800  | 0.83284400  | 0.06818500  |
| C | 4.65073400  | 0.57968100  | -0.02778700 |
| C | 5.03860900  | -0.73748600 | -0.20509400 |
| C | 4.08696400  | -1.77554500 | -0.28563300 |
| C | 2.72952400  | -1.51923500 | -0.19003200 |
| C | 1.02078000  | 0.45185800  | 0.11805400  |
| C | 1.26807900  | 1.79872000  | 0.27787800  |
| H | 5.37571500  | 1.38533100  | 0.03531700  |
| H | 6.09493700  | -0.97611100 | -0.28292500 |
| H | 4.43013300  | -2.79650200 | -0.42320800 |
| H | 1.99839400  | -2.31782800 | -0.24669800 |
| H | 0.58499000  | 2.62268000  | 0.43761000  |
| N | 2.60894100  | 2.02485700  | 0.24518900  |
| H | 3.04511300  | 2.93174200  | 0.35412600  |
| C | -0.27269800 | -0.25137300 | 0.11231700  |
| O | -0.34196000 | -1.46788900 | 0.25413500  |
| N | -1.37414800 | 0.55080200  | -0.06387600 |
| H | -1.19763100 | 1.52022200  | -0.30027500 |
| C | -2.73071800 | 0.18753100  | -0.05196600 |
| C | -3.65615800 | 1.19280300  | -0.36882600 |
| C | -3.19516000 | -1.09470200 | 0.27049000  |
| C | -5.01852400 | 0.92484400  | -0.36685100 |
| H | -3.29520000 | 2.18823900  | -0.61609300 |
| C | -4.56604200 | -1.34584200 | 0.26834000  |
| H | -2.49193100 | -1.87759600 | 0.51411100  |
| C | -5.48551100 | -0.34976100 | -0.04792600 |
| H | -5.71681400 | 1.71831800  | -0.61596900 |
| H | -4.91343700 | -2.34370200 | 0.52037600  |
| H | -6.54995000 | -0.56157000 | -0.04625400 |

**18**

E (SMD/M06-2X/BS1) = -2168.74353481 au

G (SMD/M06-2X/BS1) = -2168.541370 au

E (SMD/M06-2X/BS2//SMD/M06-2X/BS1) = -2169.13823683 au

|    |             |             |             |
|----|-------------|-------------|-------------|
| C  | -0.44464500 | -0.98405300 | 1.10411000  |
| O  | -0.89482800 | -2.02732100 | 1.49187600  |
| N  | -0.97292300 | -0.04780200 | 0.31864900  |
| C  | -0.24782600 | 1.14559600  | -0.03044900 |
| C  | -0.45609200 | 2.30818400  | 0.71188800  |
| C  | 0.62186800  | 1.13444700  | -1.11592300 |
| C  | 0.26305800  | 3.45594100  | 0.39979400  |
| H  | -1.16967900 | 2.29452000  | 1.53110900  |
| C  | 1.34871700  | 2.28498800  | -1.41582000 |
| H  | 0.73639100  | 0.22818400  | -1.70431400 |
| C  | 1.17883600  | 3.43906000  | -0.65330200 |
| H  | 0.11301700  | 4.36133000  | 0.97936200  |
| H  | 2.04579300  | 2.27734200  | -2.24813000 |
| H  | 1.74726900  | 4.33309800  | -0.89081600 |
| B  | -2.40197400 | -0.32867300 | -0.25738900 |
| Cl | -3.62830100 | -0.49883600 | 1.14155900  |
| Cl | -2.92118900 | 1.08709000  | -1.34471300 |
| Cl | -2.35393100 | -1.89154700 | -1.28574300 |
| C  | 3.03052500  | -0.19964000 | 0.49563400  |
| C  | 2.01269000  | -1.15032400 | 0.51489600  |
| C  | 1.93520500  | -2.23631000 | -0.33150800 |
| C  | 2.96703000  | -2.35276000 | -1.26619900 |
| C  | 4.00477800  | -1.41666900 | -1.31585800 |
| C  | 4.05348700  | -0.33302500 | -0.43879500 |
| C  | 2.72568400  | 0.80587200  | 1.51339500  |
| C  | 1.56752900  | 0.49899700  | 2.10303000  |
| H  | 1.11891000  | -2.95026200 | -0.28297900 |
| H  | 2.95798800  | -3.18327500 | -1.96389900 |
| H  | 4.78873700  | -1.53560800 | -2.05681600 |
| H  | 4.85984700  | 0.39130200  | -0.48760400 |
| H  | 3.33281300  | 1.67071400  | 1.74744000  |
| H  | 1.00623100  | 0.96268800  | 2.90066700  |
| N  | 1.04776600  | -0.77493500 | 1.56257300  |
| H  | 1.10038100  | -1.47477900 | 2.32124500  |

**TS7-9**

E (SMD/M06-2X/BS1) = -2132.83905148 au

G (SMD/M06-2X/BS1) = -2132.619475 au

E (SMD/M06-2X/BS2//SMD/M06-2X/BS1) = -2133.21617916 au

|   |            |            |             |
|---|------------|------------|-------------|
| C | 0.47205600 | 1.82370800 | -1.01068100 |
|---|------------|------------|-------------|

|    |             |             |             |
|----|-------------|-------------|-------------|
| C  | -0.39927400 | 1.36840900  | -0.00466700 |
| C  | -0.65253500 | 2.12312000  | 1.13791700  |
| C  | -0.01497800 | 3.35721800  | 1.24678300  |
| C  | 0.85933000  | 3.81968500  | 0.25396500  |
| C  | 1.11170100  | 3.05823100  | -0.88061600 |
| C  | 0.55168900  | 0.78134200  | -2.01250500 |
| C  | -0.23078700 | -0.23508300 | -1.60547400 |
| H  | -1.31910300 | 1.77637300  | 1.91714700  |
| H  | -0.20101900 | 3.96955600  | 2.12361900  |
| H  | 1.34441500  | 4.78328500  | 0.37599400  |
| H  | 1.79532400  | 3.40707700  | -1.64879300 |
| H  | 1.14444800  | 0.80524500  | -2.91726000 |
| H  | -0.43295500 | -1.18314400 | -2.08118900 |
| N  | -0.82908700 | 0.03827700  | -0.33190800 |
| H  | -0.10703200 | -0.73079100 | 0.56407600  |
| B  | -2.30564000 | -0.42820200 | -0.12056400 |
| Cl | -3.45565900 | 0.67638300  | -1.07263000 |
| Cl | -2.44475700 | -2.19593400 | -0.72018400 |
| Cl | -2.72552600 | -0.40930000 | 1.69722900  |
| C  | 2.01704300  | -0.81146600 | 0.91122700  |
| C  | 2.49425500  | -1.81603900 | 0.05148300  |
| C  | 3.63245600  | -1.66481000 | -0.73856000 |
| C  | 4.30999700  | -0.45906200 | -0.62588100 |
| C  | 3.86124400  | 0.55541800  | 0.24001800  |
| C  | 2.71421100  | 0.39762300  | 1.00465300  |
| C  | 0.74875500  | -1.29547700 | 1.46583100  |
| C  | 0.63169000  | -2.62825200 | 1.00437800  |
| H  | 3.96806600  | -2.45185500 | -1.40586600 |
| H  | 5.20527100  | -0.29557500 | -1.21725700 |
| H  | 4.41945500  | 1.48454600  | 0.30020300  |
| H  | 2.35541800  | 1.19516300  | 1.64955300  |
| H  | 0.30412800  | -0.95595100 | 2.39664600  |
| H  | -0.14227800 | -3.35483900 | 1.21283100  |
| N  | 1.61451100  | -2.89634800 | 0.14816800  |
| H  | 1.69600600  | -3.75850400 | -0.38298300 |

**TS<sub>10-12</sub>**

E (SMD/M06-2X/BS1) = -2168.72699749 au

G (SMD/M06-2X/BS1) = -2168.533100 au

E (SMD/M06-2X/BS2//SMD/M06-2X/BS1) = -2169.12260166 au

|   |             |             |             |
|---|-------------|-------------|-------------|
| C | -0.76925800 | -0.44592200 | 1.56966500  |
| O | -0.65418900 | -0.93142300 | 2.60212900  |
| N | -1.19499200 | -0.02548900 | 0.45061800  |
| C | -0.67421500 | 1.22585400  | -0.09133100 |



|    |             |             |             |
|----|-------------|-------------|-------------|
| C  | -0.97269600 | 2.40855600  | 0.57343100  |
| C  | 0.11132600  | 1.19576100  | -1.23667900 |
| C  | -0.45365600 | 3.60241500  | 0.07810100  |
| H  | -1.59481900 | 2.38942800  | 1.46327300  |
| C  | 0.62064400  | 2.39725700  | -1.72135400 |
| H  | 0.34044300  | 0.25209700  | -1.71830900 |
| C  | 0.34245100  | 3.59608600  | -1.06549700 |
| H  | -0.67430500 | 4.53444800  | 0.58815400  |
| H  | 1.24290300  | 2.39211600  | -2.61035000 |
| H  | 0.74658200  | 4.52797600  | -1.44807400 |
| B  | -2.52081700 | -0.71607300 | -0.18127100 |
| Cl | -3.88424600 | 0.51401200  | -0.02998600 |
| Cl | -2.15427600 | -1.11143000 | -1.94014000 |
| Cl | -2.87771400 | -2.25045000 | 0.77997700  |
| C  | 3.64870200  | -0.18973400 | 0.28379300  |
| C  | 2.34619500  | -0.69046100 | 0.40635300  |
| C  | 1.92598700  | -1.83610000 | -0.25733500 |
| C  | 2.85944400  | -2.48767500 | -1.06466900 |
| C  | 4.16271600  | -1.99934000 | -1.19265400 |
| C  | 4.57121500  | -0.84432400 | -0.51889600 |
| C  | 3.71784900  | 1.04782900  | 1.13176600  |
| C  | 2.31492800  | 1.08799600  | 1.67226500  |
| H  | 0.90977400  | -2.20806700 | -0.15043300 |
| H  | 2.56925900  | -3.38621900 | -1.60026400 |
| H  | 4.86939500  | -2.52559900 | -1.82694700 |
| H  | 5.58620200  | -0.47282100 | -0.62599500 |
| H  | 3.93678300  | 1.95823500  | 0.55932000  |
| H  | 1.93626100  | 1.85996800  | 2.33697500  |
| N  | 1.56335600  | 0.12902300  | 1.26545500  |
| H  | 4.45678600  | 0.99001500  | 1.94023600  |

### TS<sub>16-17</sub>

E (SMD/M06-2X/BS1) = -2532.42743211 au

G (SMD/M06-2X/BS1) = -2532.106436 au

E (SMD/M06-2X/BS2//SMD/M06-2X/BS1) = -2532.95695140 au

|   |             |             |             |
|---|-------------|-------------|-------------|
| C | 0.10191400  | -0.65858300 | -0.71805600 |
| O | 0.02377000  | -1.04041000 | -1.86678700 |
| N | -1.14772700 | -0.30036600 | -0.04142000 |
| C | -2.27104100 | -1.00016000 | -0.68077600 |
| C | -3.37846500 | -0.29793600 | -1.14345000 |
| C | -2.24536200 | -2.39320100 | -0.76174800 |
| C | -4.45427500 | -0.98822700 | -1.70134600 |
| H | -3.43530100 | 0.77954700  | -1.04052300 |
| C | -3.32121500 | -3.07643000 | -1.31607000 |

|    |             |             |             |
|----|-------------|-------------|-------------|
| H  | -1.38299100 | -2.93872000 | -0.39102000 |
| C  | -4.42902000 | -2.37573300 | -1.79232000 |
| H  | -5.31684100 | -0.43216200 | -2.05529100 |
| H  | -3.29313000 | -4.16010700 | -1.37378700 |
| H  | -5.26871800 | -2.91037400 | -2.22531300 |
| B  | -1.26356100 | -0.27163200 | 1.53762200  |
| Cl | -0.42754300 | 1.25528100  | 2.22296200  |
| Cl | -3.05672300 | -0.14663900 | 2.04710100  |
| Cl | -0.53112500 | -1.81711400 | 2.27736700  |
| C  | 2.37975600  | -1.65731900 | -0.24687600 |
| C  | 3.58323300  | -1.23165200 | 0.35739300  |
| C  | 4.72540800  | -2.03727200 | 0.40546900  |
| C  | 4.64027800  | -3.29176900 | -0.17536200 |
| C  | 3.44936300  | -3.73552600 | -0.78643500 |
| C  | 2.32053800  | -2.93416100 | -0.82751800 |
| C  | 1.42267200  | -0.58821400 | -0.06796200 |
| C  | 2.08761600  | 0.42591100  | 0.58188900  |
| H  | 5.63755400  | -1.68864200 | 0.87980500  |
| H  | 5.50674200  | -3.94583000 | -0.16049600 |
| H  | 3.42082700  | -4.72450000 | -1.23358700 |
| H  | 1.40862400  | -3.27771300 | -1.30683800 |
| H  | -1.23230400 | 1.03068600  | -0.49199600 |
| H  | 1.75888300  | 1.41920200  | 0.84422700  |
| N  | 3.36974700  | 0.04305900  | 0.83371200  |
| H  | 4.06216700  | 0.62408000  | 1.28878100  |
| C  | 0.16499700  | 2.65111500  | -1.26194500 |
| C  | 0.31344600  | 3.64483300  | -0.27960700 |
| C  | 1.53257000  | 4.25325800  | 0.01247900  |
| C  | 2.62344000  | 3.85360500  | -0.74875700 |
| C  | 2.49422700  | 2.88326200  | -1.75828500 |
| C  | 1.27650400  | 2.26869500  | -2.01866300 |
| C  | -1.23018700 | 2.20041100  | -1.20879000 |
| C  | -1.85138200 | 3.06709800  | -0.27179500 |
| H  | 1.61919200  | 5.00642100  | 0.78890200  |
| H  | 3.59337400  | 4.30471100  | -0.56467700 |
| H  | 3.36866300  | 2.60205400  | -2.33667400 |
| H  | 1.18906500  | 1.49955300  | -2.78027000 |
| H  | -1.76231100 | 1.82208200  | -2.07912500 |
| H  | -2.88576700 | 3.09521400  | 0.04732600  |
| N  | -0.94717600 | 3.86292200  | 0.28209300  |
| H  | -1.13242700 | 4.48860300  | 1.06092100  |

**TS<sub>12</sub>**

E (SMD/M06-2X/BS1) = -2397.93855741 au

G (SMD/M06-2X/BS1) = -2397.678588 au

E (SMD/M06-2X/BS2//SMD/M06-2X/BS1) = -2398.47320820 au

|    |             |             |             |
|----|-------------|-------------|-------------|
| C  | -0.26491100 | -0.70039100 | -0.05023800 |
| O  | 0.04526100  | -1.84876500 | 0.20678600  |
| N  | -1.50528000 | -0.19353000 | -0.13912300 |
| C  | -1.69422300 | 1.23400900  | -0.04765500 |
| C  | -1.41388800 | 1.88349000  | 1.15226000  |
| C  | -2.15397700 | 1.95023400  | -1.15111900 |
| C  | -1.58449000 | 3.26356500  | 1.24388500  |
| H  | -1.06360500 | 1.30646000  | 2.00413100  |
| C  | -2.32735300 | 3.32731000  | -1.05181400 |
| H  | -2.37401500 | 1.42229000  | -2.07450600 |
| C  | -2.04128900 | 3.98585800  | 0.14413600  |
| H  | -1.36281800 | 3.77070300  | 2.17771300  |
| H  | -2.68589700 | 3.88632500  | -1.91051600 |
| H  | -2.17673000 | 5.06043000  | 0.21784500  |
| B  | -2.70591500 | -1.17488000 | 0.02258000  |
| Cl | -2.69948000 | -1.90005900 | 1.75274800  |
| Cl | -4.31422500 | -0.26628400 | -0.22243300 |
| Cl | -2.59282800 | -2.53108800 | -1.25979900 |
| C  | 2.84757800  | 1.24192000  | -0.03614600 |
| C  | 1.96002600  | 0.33461800  | 0.55741300  |
| C  | 2.20808500  | -0.29968500 | 1.77245000  |
| C  | 3.40409400  | 0.02230300  | 2.40005500  |
| C  | 4.30657900  | 0.93486900  | 1.83032400  |
| C  | 4.04625800  | 1.54458600  | 0.60993600  |
| C  | 2.27887600  | 1.61024100  | -1.34426500 |
| C  | 0.98821100  | 1.01409200  | -1.35468300 |
| H  | 1.50849500  | -1.00767400 | 2.20345700  |
| H  | 3.64343100  | -0.44233300 | 3.35096700  |
| H  | 5.22839200  | 1.16378900  | 2.35577300  |
| H  | 4.75170900  | 2.24301200  | 0.17103700  |
| H  | 2.85870500  | 0.75675200  | -2.12330100 |
| H  | 0.23175100  | 1.05589700  | -2.12944200 |
| N  | 0.82869500  | 0.24147900  | -0.28607000 |
| H  | 2.45946900  | 2.55808100  | -1.84585900 |
| O  | 3.55646800  | -0.22683800 | -2.80890300 |
| H  | 4.29321800  | 0.19330900  | -3.28797900 |
| H  | 3.97613900  | -0.78921800 | -2.07072800 |
| O  | 4.53565600  | -1.53665400 | -0.81470200 |
| H  | 3.81230300  | -2.06372300 | -0.38196000 |
| H  | 5.21351200  | -2.18812900 | -1.05695500 |
| O  | 2.57968800  | -3.03382000 | 0.24914400  |
| H  | 2.46102800  | -3.85321300 | -0.25750800 |

H 1.70758800 -2.59118800 0.21667000

**TS'12**

E (SMD/M06-2X/BS1) = -2397.95938490 au

G (SMD/M06-2X/BS1) = -2397.693891 au

E (SMD/M06-2X/BS2//SMD/M06-2X/BS1) = -2398.49146483 au

|    |             |             |             |
|----|-------------|-------------|-------------|
| C  | -0.23604600 | -0.17533000 | -0.52997100 |
| O  | -0.43630100 | -0.91714000 | -1.46515600 |
| N  | 1.06361700  | -0.06322900 | 0.11355800  |
| C  | 1.63864200  | 1.27568900  | -0.06472300 |
| C  | 1.51463200  | 1.92063300  | -1.29274900 |
| C  | 2.30071800  | 1.88737300  | 0.99813300  |
| C  | 2.05378400  | 3.19458800  | -1.45398600 |
| H  | 1.00384200  | 1.43159300  | -2.11765400 |
| C  | 2.84244900  | 3.15757400  | 0.82471500  |
| H  | 2.39525300  | 1.37550000  | 1.95110500  |
| C  | 2.71960600  | 3.81327600  | -0.39904100 |
| H  | 1.95389200  | 3.69841100  | -2.40994500 |
| H  | 3.35895400  | 3.63430300  | 1.65155700  |
| H  | 3.14054000  | 4.80523000  | -0.52861600 |
| B  | 2.07100300  | -1.25905900 | -0.23525800 |
| Cl | 2.61240300  | -1.22372300 | -1.99942900 |
| Cl | 3.54671800  | -1.08220400 | 0.88209200  |
| Cl | 1.20496300  | -2.85979400 | 0.19119600  |
| C  | -3.33697300 | 1.31736500  | 0.51470600  |
| C  | -2.60138800 | 0.49013000  | -0.35715000 |
| C  | -3.21874600 | -0.22731600 | -1.38297400 |
| C  | -4.59877300 | -0.09946400 | -1.50524200 |
| C  | -5.34559600 | 0.71370500  | -0.64139900 |
| C  | -4.72250400 | 1.42886100  | 0.37156900  |
| C  | -2.40050700 | 1.92399300  | 1.43363000  |
| C  | -1.16902100 | 1.47009700  | 1.12635700  |
| H  | -2.65988000 | -0.84851200 | -2.06787700 |
| H  | -5.10478100 | -0.64415600 | -2.29612200 |
| H  | -6.42087000 | 0.78584300  | -0.77118400 |
| H  | -5.29231200 | 2.06546500  | 1.04163700  |
| H  | 0.81237500  | -0.32853900 | 1.38612000  |
| H  | -0.21926800 | 1.74440700  | 1.55651600  |
| N  | -1.24490800 | 0.57565500  | 0.03710200  |
| H  | -2.63386100 | 2.63119700  | 2.21753900  |
| O  | 0.48750700  | -0.71935300 | 2.46819300  |
| H  | 0.36596700  | 0.02468400  | 3.08916700  |
| H  | -0.44714700 | -1.17463500 | 2.34178500  |
| O  | -1.79829300 | -1.66993500 | 2.04260400  |

|   |             |             |             |
|---|-------------|-------------|-------------|
| H | -1.88600300 | -2.17269500 | 1.18584800  |
| H | -2.12202800 | -2.26962000 | 2.73607800  |
| O | -2.01923900 | -2.99339200 | -0.28059600 |
| H | -1.60137400 | -3.86514700 | -0.17894900 |
| H | -1.42974100 | -2.51624100 | -0.89252300 |

**TS<sub>11-15</sub>**

E (SMD/M06-2X/BS1) = -2168.72854766 au

G (SMD/M06-2X/BS1) = -2168.531881 au

E (SMD/M06-2X/BS2//SMD/M06-2X/BS1) = -2169.12640697 au

|    |             |             |             |
|----|-------------|-------------|-------------|
| C  | 0.12485300  | 0.49421200  | 0.49695100  |
| O  | 0.73969000  | 1.22995600  | 1.14929600  |
| N  | -1.00116400 | -0.07778400 | 0.20668100  |
| C  | -2.12547400 | 0.85529500  | 0.22000700  |
| C  | -2.55181400 | 1.38738400  | 1.43220700  |
| C  | -2.74075700 | 1.17557200  | -0.98476800 |
| C  | -3.63281200 | 2.26405900  | 1.43344000  |
| H  | -2.05025300 | 1.10833300  | 2.35421200  |
| C  | -3.82855500 | 2.04576200  | -0.96655000 |
| H  | -2.37792900 | 0.74504600  | -1.91232300 |
| C  | -4.27167100 | 2.58970400  | 0.23741700  |
| H  | -3.97983400 | 2.68505700  | 2.37143600  |
| H  | -4.32497700 | 2.30081500  | -1.89727900 |
| H  | -5.11754000 | 3.26990100  | 0.24447800  |
| B  | -1.19076400 | -1.62214900 | -0.01544700 |
| Cl | 0.27056700  | -2.47681800 | 0.75184800  |
| Cl | -2.75071000 | -2.11511300 | 0.84119000  |
| Cl | -1.31301600 | -1.99915400 | -1.83348900 |
| C  | 2.87465600  | -0.08435100 | -0.44086000 |
| C  | 3.27980400  | 1.26714500  | -0.43927900 |
| C  | 4.42529000  | 1.71293100  | 0.22435200  |
| C  | 5.17396600  | 0.75677300  | 0.89123200  |
| C  | 4.79274300  | -0.60034100 | 0.90047700  |
| C  | 3.64996600  | -1.03057400 | 0.24665300  |
| C  | 1.63555200  | -0.14348000 | -1.17871600 |
| C  | 1.40125000  | 1.14632200  | -1.65479500 |
| H  | 4.71207400  | 2.75956200  | 0.21396300  |
| H  | 6.07396600  | 1.05858900  | 1.41796700  |
| H  | 5.40846900  | -1.31854400 | 1.43280300  |
| H  | 3.35919300  | -2.07638300 | 0.25900800  |
| H  | 1.12378800  | -1.03070700 | -1.52099800 |
| H  | 0.59580900  | 1.51482900  | -2.27691900 |
| N  | 2.35522800  | 1.97843800  | -1.18938600 |
| H  | 2.37681800  | 2.97999300  | -1.34348200 |

**TS<sub>11-18</sub>**

E (SMD/M06-2X/BS1) = -2168.72946445 au

G (SMD/M06-2X/BS1) = -2168.532263 au

E (SMD/M06-2X/BS2//SMD/M06-2X/BS1) = -2169.12671088 au

|    |             |             |             |
|----|-------------|-------------|-------------|
| C  | -0.80048500 | -0.57226600 | 1.47477700  |
| O  | -1.14938700 | -1.17562900 | 2.39808600  |
| N  | -0.97150800 | -0.00163100 | 0.34283400  |
| C  | -0.16995100 | 1.14390400  | -0.04668300 |
| C  | -0.28184800 | 2.31960700  | 0.68973200  |
| C  | 0.65354500  | 1.04651500  | -1.16062300 |
| C  | 0.47090000  | 3.42571700  | 0.30604000  |
| H  | -0.94801000 | 2.36089800  | 1.54685800  |
| C  | 1.39960000  | 2.16091700  | -1.53451200 |
| H  | 0.71871000  | 0.11156900  | -1.70875400 |
| C  | 1.31138400  | 3.34462900  | -0.80295600 |
| H  | 0.39746600  | 4.34803400  | 0.87295700  |
| H  | 2.05667700  | 2.09795600  | -2.39617400 |
| H  | 1.89682200  | 4.20877300  | -1.10137500 |
| B  | -2.41185800 | -0.31245200 | -0.34437500 |
| Cl | -3.67421400 | 0.67204000  | 0.58799900  |
| Cl | -2.32690500 | 0.19464500  | -2.10266700 |
| Cl | -2.72576500 | -2.12777500 | -0.18975000 |
| C  | 3.04633100  | -0.35157300 | 0.25711000  |
| C  | 2.01620900  | -1.19823800 | 0.69681200  |
| C  | 1.65461200  | -2.36122500 | 0.02868600  |
| C  | 2.37080800  | -2.67639400 | -1.12277600 |
| C  | 3.40112900  | -1.84252200 | -1.58471200 |
| C  | 3.74709400  | -0.67791400 | -0.90723000 |
| C  | 3.09328700  | 0.77023400  | 1.18097700  |
| C  | 2.13082900  | 0.57665500  | 2.10631100  |
| H  | 0.84324500  | -2.98978000 | 0.38563400  |
| H  | 2.12272900  | -3.57696700 | -1.67532800 |
| H  | 3.93382800  | -2.11207400 | -2.49150700 |
| H  | 4.53784400  | -0.03237400 | -1.27775300 |
| H  | 3.76625400  | 1.61563600  | 1.12848600  |
| H  | 1.85411200  | 1.17153200  | 2.96574300  |
| N  | 1.39245100  | -0.60293700 | 1.82207500  |
| H  | 1.22448400  | -1.21371200 | 2.62341300  |

**TS<sub>15-16</sub>**

E (SMD/M06-2X/BS1) = -2532.42831649 au

G (SMD/M06-2X/BS1) = -2532.109677 au

E (SMD/M06-2X/BS2//SMD/M06-2X/BS1) = -2532.95775850 au

|    |             |             |             |
|----|-------------|-------------|-------------|
| C  | 0.79968000  | 0.35376000  | -0.83321100 |
| O  | 0.84070100  | 0.21912500  | -2.05361400 |
| N  | 1.92157900  | 0.26803600  | -0.04497100 |
| C  | 3.05563200  | -0.30219300 | -0.73434800 |
| C  | 3.41940000  | -1.61889600 | -0.46809100 |
| C  | 3.78071300  | 0.45428200  | -1.65383600 |
| C  | 4.51984200  | -2.17993100 | -1.11679100 |
| H  | 2.84626400  | -2.19266800 | 0.25435600  |
| C  | 4.87354200  | -0.10960700 | -2.30280000 |
| H  | 3.48324700  | 1.48034100  | -1.84679300 |
| C  | 5.24715700  | -1.42768200 | -2.03462400 |
| H  | 4.80539600  | -3.20544000 | -0.90215500 |
| H  | 5.43801200  | 0.48116400  | -3.01807500 |
| H  | 6.10333200  | -1.86400300 | -2.54021800 |
| B  | 2.14254500  | 0.74342600  | 1.39012200  |
| Cl | 1.78979500  | -0.66034500 | 2.63693700  |
| Cl | 3.92671000  | 1.25280300  | 1.64709100  |
| Cl | 1.08502000  | 2.23039200  | 1.83150300  |
| C  | -1.52481500 | 1.50266800  | -0.77075400 |
| C  | -2.54258600 | 1.63704600  | 0.18805500  |
| C  | -3.67761000 | 2.42007500  | -0.01388300 |
| C  | -3.76101100 | 3.09449700  | -1.22351900 |
| C  | -2.75110800 | 2.97736400  | -2.19631000 |
| C  | -1.63422800 | 2.17887200  | -1.98930500 |
| C  | -0.56380100 | 0.53229000  | -0.23496700 |
| C  | -1.03632300 | 0.22381600  | 1.06328700  |
| H  | -4.45473900 | 2.49312000  | 0.74010600  |
| H  | -4.62359600 | 3.72165800  | -1.42496100 |
| H  | -2.85287400 | 3.52018700  | -3.13081800 |
| H  | -0.86211500 | 2.07339200  | -2.74382700 |
| H  | -1.10553300 | -0.62833900 | -0.88538500 |
| H  | -0.60387700 | -0.43336000 | 1.80558000  |
| N  | -2.20124800 | 0.83379100  | 1.27343800  |
| H  | -2.77912400 | 0.69572500  | 2.09706500  |
| C  | -2.92756900 | -1.70002100 | -0.80381700 |
| C  | -2.67284200 | -2.45840200 | 0.35413500  |
| C  | -3.58326400 | -2.56689500 | 1.40589800  |
| C  | -4.78779900 | -1.89599600 | 1.25606700  |
| C  | -5.07166100 | -1.14345200 | 0.09889100  |
| C  | -4.14985500 | -1.02786200 | -0.92985200 |
| C  | -1.69482400 | -1.70948000 | -1.58416500 |
| C  | -0.84017200 | -2.61949500 | -0.93237200 |
| H  | -3.35550000 | -3.14730600 | 2.29406100  |
| H  | -5.53056800 | -1.95684900 | 2.04528400  |

|   |             |             |             |
|---|-------------|-------------|-------------|
| H | -6.02870100 | -0.63733500 | 0.01939200  |
| H | -4.36082400 | -0.42552600 | -1.80863600 |
| H | -1.58217100 | -1.40154400 | -2.61686000 |
| H | 0.16138700  | -2.92758200 | -1.20296800 |
| N | -1.38974400 | -2.98964300 | 0.22820900  |
| H | -0.93537100 | -3.57806100 | 0.92025800  |

**TS<sub>18</sub>**

E (SMD/M06-2X/BS1) = -2532.41671109 au

G (SMD/M06-2X/BS1) = -2532.098486 au

E (SMD/M06-2X/BS2//SMD/M06-2X/BS1) = -2532.94472985 au

|    |             |             |             |
|----|-------------|-------------|-------------|
| C  | 0.83421400  | -0.05000800 | -0.84757100 |
| O  | 0.77112900  | -0.50398800 | -1.96925000 |
| N  | 1.94403300  | 0.09623500  | -0.08142200 |
| C  | 3.01580200  | -0.80279100 | -0.45668400 |
| C  | 3.34809200  | -1.82687400 | 0.42513800  |
| C  | 3.70279500  | -0.65214400 | -1.66004800 |
| C  | 4.38234200  | -2.70569500 | 0.10403700  |
| H  | 2.80073900  | -1.92563400 | 1.35762000  |
| C  | 4.72714900  | -1.53743400 | -1.97885000 |
| H  | 3.43398300  | 0.15667500  | -2.33114600 |
| C  | 5.07076000  | -2.56339500 | -1.09744300 |
| H  | 4.64444600  | -3.50197000 | 0.79393500  |
| H  | 5.26320200  | -1.42213200 | -2.91594200 |
| H  | 5.87468800  | -3.24853700 | -1.34856100 |
| B  | 2.29392600  | 1.26401900  | 0.87206300  |
| Cl | 2.20425000  | 0.73288600  | 2.67852900  |
| Cl | 4.05028000  | 1.83181900  | 0.54519700  |
| Cl | 1.16874000  | 2.72013100  | 0.56929900  |
| C  | -1.37650800 | 1.18902200  | -0.79126400 |
| C  | -2.18769700 | 1.67502900  | 0.24111100  |
| C  | -3.21113500 | 2.57199900  | -0.06543200 |
| C  | -3.37760000 | 2.95627700  | -1.39292300 |
| C  | -2.54717200 | 2.45534200  | -2.40400200 |
| C  | -1.53036500 | 1.54352700  | -2.12112300 |
| C  | -0.71993000 | 0.23497700  | 1.20488700  |
| H  | -3.86235400 | 2.95463400  | 0.71412900  |
| H  | -4.16535800 | 3.65659600  | -1.65201500 |
| H  | -2.69902600 | 2.77610800  | -3.42954600 |
| H  | -0.89162000 | 1.13782100  | -2.89730400 |
| H  | -1.06659500 | -0.88428300 | -0.56652400 |
| H  | -0.12462700 | -0.40965400 | 1.83427000  |
| C  | -3.15457400 | -1.63718900 | -0.49811400 |
| C  | -3.24948400 | -2.29198300 | 0.74555400  |



|   |             |             |             |
|---|-------------|-------------|-------------|
| C | -4.31820300 | -2.10226900 | 1.62340000  |
| C | -5.32125300 | -1.24123800 | 1.20656000  |
| C | -5.25771700 | -0.58989500 | -0.04126500 |
| C | -4.18241300 | -0.77187400 | -0.89607000 |
| C | -1.86322000 | -2.00505700 | -1.06860200 |
| C | -1.31529700 | -2.94572400 | -0.18212800 |
| H | -4.35720400 | -2.60660400 | 2.58343300  |
| H | -6.17402000 | -1.06535600 | 1.85459000  |
| H | -6.06423000 | 0.07641600  | -0.33135200 |
| H | -4.12549500 | -0.24585800 | -1.84505800 |
| H | -1.57102800 | -1.91161600 | -2.10923100 |
| H | -0.37946800 | -3.48514700 | -0.25049100 |
| N | -2.10981800 | -3.07472700 | 0.88897700  |
| H | -1.89112100 | -3.63738700 | 1.70486600  |
| N | -0.48629300 | 0.20422600  | -0.21837000 |
| C | -1.75557300 | 1.04371700  | 1.47851300  |
| H | -2.19270600 | 1.19746000  | 2.45620500  |

### TS9-10

E (SMD/M06-2X/BS1) = -2133.21948180 au

G (SMD/M06-2X/BS1) = -2132.622128 au

E (SMD/M06-2X/BS2//SMD/M06-2X/BS1) = -2133.22251296 au

|    |             |             |             |
|----|-------------|-------------|-------------|
| C  | -0.54580500 | 0.72548500  | -1.50001900 |
| C  | 0.45412400  | 0.94298800  | -0.53364400 |
| C  | 0.33648900  | 1.94462300  | 0.43431400  |
| C  | -0.80235400 | 2.73753800  | 0.39154200  |
| C  | -1.79971400 | 2.54244900  | -0.58031800 |
| C  | -1.68789800 | 1.53204800  | -1.52389600 |
| C  | -0.14317200 | -0.46477300 | -2.24075400 |
| C  | 1.15592000  | -0.75911800 | -1.78651300 |
| H  | 1.10434100  | 2.10788500  | 1.18132300  |
| H  | -0.92036700 | 3.53118600  | 1.12288800  |
| H  | -2.67373000 | 3.18663000  | -0.58335400 |
| H  | -2.46638100 | 1.36547300  | -2.26239300 |
| H  | -0.53908200 | -0.78730100 | -3.19671900 |
| H  | 1.81141100  | -1.55012600 | -2.12327500 |
| N  | 1.48016700  | -0.00261200 | -0.72888500 |
| B  | 2.76561100  | -0.09043700 | 0.12266000  |
| Cl | 2.29559800  | -0.34054700 | 1.92548700  |
| Cl | 3.80275000  | -1.52653500 | -0.43360600 |
| Cl | 3.72019000  | 1.49859600  | -0.05763600 |
| H  | -0.73112400 | -1.39037800 | -1.30997600 |
| C  | -2.63589800 | -1.41158000 | -0.08050800 |
| C  | -2.40122900 | -0.64091700 | 1.07429200  |

|   |             |             |             |
|---|-------------|-------------|-------------|
| C | -3.31493300 | 0.28998900  | 1.56522100  |
| C | -4.50508000 | 0.42593400  | 0.86469400  |
| C | -4.76782900 | -0.34083300 | -0.28555900 |
| C | -3.84290500 | -1.25507500 | -0.77076200 |
| C | -1.41896700 | -2.18016500 | -0.33209500 |
| C | -0.57577300 | -1.90370900 | 0.76720200  |
| H | -3.09765200 | 0.88253900  | 2.44820400  |
| H | -5.24852900 | 1.13653900  | 1.21182300  |
| H | -5.71321300 | -0.21020000 | -0.80297400 |
| H | -4.04898500 | -1.83601800 | -1.66476300 |
| H | -1.37018400 | -3.11118400 | -0.88857500 |
| H | 0.40646800  | -2.29943300 | 0.99110700  |
| N | -1.13892300 | -0.98068200 | 1.55229100  |
| H | -0.67472100 | -0.53541400 | 2.33818600  |

**TS<sub>10-11</sub>**

E (SMD/M06-2X/BS1) = -2168.72699749 au

G (SMD/M06-2X/BS1) = -2168.533100 au

E (SMD/M06-2X/BS2//SMD/M06-2X/BS1) = -2169.12260166 au

|    |             |             |             |
|----|-------------|-------------|-------------|
| C  | -0.76925800 | -0.44592200 | 1.56966500  |
| O  | -0.65418900 | -0.93142300 | 2.60212900  |
| N  | -1.19499200 | -0.02548900 | 0.45061800  |
| C  | -0.67421500 | 1.22585400  | -0.09133100 |
| C  | -0.97269600 | 2.40855600  | 0.57343100  |
| C  | 0.11132600  | 1.19576100  | -1.23667900 |
| C  | -0.45365600 | 3.60241500  | 0.07810100  |
| H  | -1.59481900 | 2.38942800  | 1.46327300  |
| C  | 0.62064400  | 2.39725700  | -1.72135400 |
| H  | 0.34044300  | 0.25209700  | -1.71830900 |
| C  | 0.34245100  | 3.59608600  | -1.06549700 |
| H  | -0.67430500 | 4.53444800  | 0.58815400  |
| H  | 1.24290300  | 2.39211600  | -2.61035000 |
| H  | 0.74658200  | 4.52797600  | -1.44807400 |
| B  | -2.52081700 | -0.71607300 | -0.18127100 |
| Cl | -3.88424600 | 0.51401200  | -0.02998600 |
| Cl | -2.15427600 | -1.11143000 | -1.94014000 |
| Cl | -2.87771400 | -2.25045000 | 0.77997700  |
| C  | 3.64870200  | -0.18973400 | 0.28379300  |
| C  | 2.34619500  | -0.69046100 | 0.40635300  |
| C  | 1.92598700  | -1.83610000 | -0.25733500 |
| C  | 2.85944400  | -2.48767500 | -1.06466900 |
| C  | 4.16271600  | -1.99934000 | -1.19265400 |
| C  | 4.57121500  | -0.84432400 | -0.51889600 |
| C  | 3.71784900  | 1.04782900  | 1.13176600  |

|   |            |             |             |
|---|------------|-------------|-------------|
| C | 2.31492800 | 1.08799600  | 1.67226500  |
| H | 0.90977400 | -2.20806700 | -0.15043300 |
| H | 2.56925900 | -3.38621900 | -1.60026400 |
| H | 4.86939500 | -2.52559900 | -1.82694700 |
| H | 5.58620200 | -0.47282100 | -0.62599500 |
| H | 3.93678300 | 1.95823500  | 0.55932000  |
| H | 1.93626100 | 1.85996800  | 2.33697500  |
| N | 1.56335600 | 0.12902300  | 1.26545500  |
| H | 4.45678600 | 0.99001500  | 1.94023600  |

## 6. References

- 1 M. Santi, D. M. C. Ould, J. Wenz, Y. Soltani, R. L. Melen and T. Wirth, *Angew. Chem. Int. Ed.*, 2019, **58**, 7861.
  - 2 G. C. Senadi, J. Wang, B. S. Gore and J. Wang, *Adv. Synth. Catal.*, 2017, **359**, 2747.
  - 3 C. Yue, Q. Xing, P. Sun, Z. Zhao, H. Lv and F. Li, *Nat. Commun.*, 2021, **12**, 1.
  - 4 P. La Manna, C. Talotta, M. De Rosa, A. Soriente, C. Gaeta and P. Neri, *Org. Lett.*, 2020, **22**, 2590.
  - 5 K. Hiramatsu and H. Tamamura, *Eur. J. Org. Chem.*, 2016, 3491.
  - 6 Y. Yan, Z. Zhang, Y. Wan, G. Zhang, N. Ma and Q. Liu, *J. Org. Chem.*, 2017, **82**, 7957.
  - 7 A. Velavan, S. Sumathi and K. K. Balasubramanian, *Eur. J. Org. Chem.*, 2013, 3148.
  - 8 J. Chen, L. Hu, H. Wang, L. Liu and B. Yuan, *Eur. J. Org. Chem.*, 2019, **2019**, 3949.
  - 9 D. Ye, J. Wang, X. Zhang, Y. Zhou, X. Ding, E. Feng, H. Sun, G. Liu, H. Jiang and H. Liu, *Green Chem.*, 2009, **11**, 1201.
  - 10 S. Özcan and M. Balci, *Tetrahedron*, 2008, **64**, 5531.
  - 11 L. Mistry, K. Mapesa, T. W. Bousfield and J. E. Camp, *Green Chem.*, 2017, **19**, 2123.
  - 12 D. Chaturvedi, N. Mishra and V. Mishra, *Monatshefte für Chemie*, 2008, **139**, 267.
  - 13 Z. Hou, Z. Mao, H. Zhao, Y. Y. Melcamu, X. Lu, J. Song and H. Xu, *Angew. Chem. Int. Ed.*, 2016, **55**, 9168.
- [\* the benzylic protons (CH<sub>2</sub>) in **6a-6i** compounds, appeared as very weak broad singlets in the region between 4.5–5.5 ppm, as evidenced from the HSQC for this compound (Figure S101). This is also supported by this literature report.]
- 14 S. Guidotti, I. Camurati, F. Focante, L. Angellini, G. Moscardi, L. Resconi, R. Leardini, D. Nanni, P. Mercandelli and A. Sironi, *J. Org. Chem.*, 2003, **68**, 5445.
  - 14 Agilent Technologies. CrysAlisPro. (2014).
  - 15 Sheldrick, G. M. SHELXL-2013. (2013).
  - 16 M. J. Frisch, G. W. Trucks, H. B. Schlegel, G. E. Scuseria, M. A. Robb, J. R. Cheeseman, G. Scalmani, V. Barone, G. A. Petersson, H. Nakatsuji, X. Li, M. Caricato, A. V. Marenich, J. Bloino, B. G. Janesko, R. Gomperts, B. Mennucci, H. P. Hratchian, J. V. Ortiz, A. F. Izmaylov, J. L. Sonnenberg, D. Williams-Young, F. Ding, F. Lipparini, F. Egidi, J. Goings, B. Peng, A. Petrone, T. Henderson, D. Ranasinghe, V. G. Zakrzewski, J. Gao, N. Rega, G. Zheng, W. Liang, M. Hada, M. Ehara, K. Toyota, R. Fukuda, J. Hasegawa, M. Ishida, T. Nakajima, Y. Honda, O. Kitao, H. Nakai, T. Vreven, K. Throssell, J. A. Montgomery, J. E. Peralta, F.

Ogliaro, M. J. Bearpark, J. J. Heyd, E. N. Brothers, K. N. Kudin, V. N. Staroverov, T. A. Keith, R. Kobayashi, J. Normand, K. Raghavachari, A. P. Rendell, J. C. Burant, S. S. Iyengar, J. Tomasi, M. Cossi, J. M. Millam, M. Klene, C. Adamo, R. Cammi, J. W. Ochterski, R. L. Martin, K. Morokuma, O. Farkas, J. B. Foresman and D. J. Fox, Gaussian 16, Revision A.03, Gaussian, Inc., Wallingford CT, 2016.

- 17 Y. Zhao and D. G. Truhlar, *Theor. Chem. Acc.*, 2008, **120**, 215.
- 18 A. V. Marenich, C. T. Cramer and D. G. Truhlar, *J. Phys. Chem. B*, 2009, **113**, 6378.
- 19 P. C. Hariharan and J. A. Pople, *Theor. Chem. Acta.*, 1973, **28**, 213.
- 20 (a) K. Fukui, *J. Chem. Phys.*, 1970, **74**, 4161 (b) K. Fukui, *Acc. Chem. Res.*, 1981, **14**, 363.
- 21 F. Weigend, F. Furche and R. Ahlrichs, *J. Chem. Phys.*, 2003, **119**, 12753.
